# Supplementary material
Source: publisher figshare collection journal article supplement (https://acs.figshare.com/ndownloader/files/20163416)
Supplement: Supplementary file 1 [file 20163416]

## Sheet: Table S1
Supplemental Table S1. Complete list of protein detected by iTRAQ
Accession	Description	Coverage	# Peptides	# PSMs	# Unique Peptides	# AAs	MW [kDa]	calc. pI	Entrez Gene ID	Gene ID	Chromosome	Biological Process	Cellular Component	Molecular Function	Pfam IDs	Abundances (Scaled): non-infiltrated (n.i.)	Abundances (Scaled): empty-vector (EV)	Abundances (Scaled): M2 channel (M2)	Ratio: EV / n.i.	Ratio: M2 / n.i.	Ratio: M2 / EV	emPAI	Score Mascot
K4B9V1	Aminomethyltransferase OS=Solanum lycopersicum GN=Solyc02g080810.2 PE=3 SV=1	24.1379	16	134	16	406	44.266	8.44	101249137	LOC101249137; Solyc02g080810.2	2	metabolic process;response to stimulus	cytoplasm;extracellular;membrane;ribosome	catalytic activity;protein binding	Pf01571, Pf08669	100.5	96.9	81.4	0.964179	0.80995	0.840041	13.065	2583.93
Q5M9V4	ATP synthase subunit alpha OS=Nicotiana tabacum GN=atp1 PE=3 SV=2	35.167	17	180	16	509	55.289	6.1				metabolic process;transport	mitochondrion	catalytic activity;nucleotide binding;transporter activity	Pf00006, Pf00306, Pf02874, Pf09378	51	110.7	135	2.17059	2.64706	1.21951	28.552	3748.69
P93338	NADP-dependent glyceraldehyde-3-phosphate dehydrogenase OS=Nicotiana plumbaginifolia GN=GAPN PE=2 SV=1	35.0806	16	162	16	496	53.109	7.37				metabolic process	cytoplasm	catalytic activity	Pf00171, Pf05893	100.3	89.2	104.2	0.889332	1.03888	1.16816	37.075	4533.19
K4CPC2	Uncharacterized protein OS=Solanum lycopersicum GN=Solyc08g081250.2 PE=4 SV=1	19.019	16	36	16	999	113.085	6.67		Solyc08g081250.2	8	metabolic process		catalytic activity;metal ion binding	Pf01433, Pf11940, Pf13485	101.5	109.1	104.5	1.07488	1.02956	0.957837	0.949	677.626
R4S2V6	Lipoxygenase (Fragment) OS=Nicotiana benthamiana GN=9-lox PE=2 SV=1	21.2297	19	38	15	862	97.385	5.77				metabolic process		catalytic activity;metal ion binding;protein binding	Pf00305, Pf01477	86.8	48.5	50.5	0.558756	0.581797	1.04124	1.868	718.209
P93400	Phospholipase D alpha 1 OS=Nicotiana tabacum GN=PLD1 PE=2 SV=2	20.9158	16	63	15	808	91.908	5.63				metabolic process	membrane	catalytic activity;metal ion binding;protein binding	Pf00168, Pf00614, Pf12357, Pf13091	62.1	115	115.5	1.85185	1.8599	1.00435	1.904	1535.15
P35494	2,3-bisphosphoglycerate-independent phosphoglycerate mutase OS=Nicotiana tabacum PE=2 SV=1	39.356	20	144	14	559	61.029	6.42				metabolic process	cytoplasm	catalytic activity;metal ion binding	Pf01676, Pf06415	81.9	100.8	110.5	1.23077	1.34921	1.09623	32.839	4327.95
A0A0E3JCP4	Developmentally-regulated plasma membrane polypeptide OS=Nicotiana benthamiana GN=DREPP PE=2 SV=1	66.9492	14	68	14	236	24.755	4.92				response to stimulus			Pf05558	133.6	92.3	66.7	0.690868	0.499251	0.722644	60.054	1255.88
W0KS23	Glucose-1-phosphate adenylyltransferase OS=Nicotiana tabacum GN=agpL3 PE=2 SV=1	26.4078	14	118	14	515	56.475	7.75				metabolic process		catalytic activity	Pf00483	132.9	90.8	89.7	0.68322	0.674944	0.987885	6.686	3510.73
Q9XPR6	Thylakoid-bound ascorbate peroxidase OS=Nicotiana tabacum PE=2 SV=1	35.4023	14	69	14	435	47.218	8.07				metabolic process;response to stimulus		antioxidant activity;catalytic activity	Pf00141	107.8	87.9	91.5	0.815399	0.848794	1.04096	9.826	1343.88
K4AVZ4	Uncharacterized protein OS=Solanum lycopersicum GN=Solyc01g057830.2 PE=4 SV=1	36.4078	14	55	14	412	45.236	5.45	101247851	LOC101247851; Solyc01g057830.2	1	metabolic process	ribosome	RNA binding;structural molecule activity	Pf00575	167.7	47.2	60.3	0.281455	0.359571	1.27754	7.483	1252.98
K4DAD5	Uncharacterized protein OS=Solanum lycopersicum GN=Solyc11g069790.1 PE=3 SV=1	30.4422	17	136	14	588	61.918	5.3	101266598	LOC101266598; Solyc11g069790.1	11	cell organization and biogenesis;metabolic process	cytoplasm;extracellular;membrane;mitochondrion;ribosome	nucleotide binding	Pf00118	141.3	62.1	75.6	0.43949	0.535032	1.21739	27.48	4545.95
P00823	ATP synthase subunit alpha, chloroplastic OS=Nicotiana tabacum GN=atpA PE=2 SV=2	33.3333	16	357	13	507	55.42	5.21				metabolic process;transport	membrane	catalytic activity;nucleotide binding;transporter activity	Pf00006, Pf00306, Pf02874, Pf09378	132	66.1	94.8	0.500758	0.718182	1.43419	38.811	7142.84
S6A7M4	Cysteine synthase OS=Nicotiana attenuata PE=2 SV=1	55.5556	14	151	13	387	41.163	5.38				metabolic process		catalytic activity	Pf00291	158.1	61.7	83.2	0.390259	0.526249	1.34846	53.844	4559.17
Q7X998	MRNA-binding protein (Fragment) OS=Nicotiana tabacum GN=csp41 PE=2 SV=1	39.0123	16	247	13	405	44.217	6.96				metabolic process		catalytic activity	Pf01370, Pf13460	122.7	85.8	112.8	0.699267	0.919315	1.31469	74.858	5938.07
Q9XG77	Proteasome subunit alpha type-6 OS=Nicotiana tabacum GN=PAA1 PE=2 SV=1	47.561	13	52	13	246	27.286	6.32				metabolic process	cytoplasm;nucleus;proteasome	catalytic activity	Pf00227, Pf10584	75.6	118.5	113.7	1.56746	1.50397	0.959494	15.238	1305.09
K4C8H3	Uncharacterized protein OS=Solanum lycopersicum GN=Solyc06g071000.2 PE=4 SV=1	25.8123	13	46	13	554	61.475	7.25		Solyc06g071000.2	6	metabolic process;response to stimulus		catalytic activity;metal ion binding	Pf00171	67.4	126.1	107.7	1.87092	1.59792	0.854084	4.179	1129.55
O80360	50S ribosomal protein L3, chloroplastic (Fragment) OS=Nicotiana tabacum GN=RPL3 PE=2 SV=1	46.332	12	99	12	259	28.352	10.64				metabolic process	ribosome	RNA binding;structural molecule activity	Pf00297	145.1	75.8	97	0.522398	0.668504	1.27968	51.75	1927.62
K4BJE6	Alanine--tRNA ligase OS=Solanum lycopersicum GN=Solyc03g097290.2 PE=3 SV=1	13.7624	12	45	12	1010	110.797	6.38	101244561	LOC101244561; Solyc03g097290.2	3	metabolic process;response to stimulus	cytoplasm;cytosol;mitochondrion	catalytic activity;metal ion binding;nucleotide binding;RNA binding	Pf01411, Pf07973	117.4	71.2	91.2	0.606474	0.776831	1.2809	1.569	1136.09
Q7M242	Glutamate synthase (Ferredoxin) (Clone C(35)) (Fragment) OS=Nicotiana tabacum PE=4 SV=1	38.1818	35	445	12	990	106.083	6.96				metabolic process		catalytic activity	Pf01493, Pf01645, Pf04898	123.1	88.6	105.6	0.71974	0.857839	1.19187	43.478	11588.8
Q43797	Inorganic pyrophosphatase OS=Nicotiana tabacum GN=ppa PE=2 SV=1	12.4021	12	43	12	766	79.997	5.11				metabolic process;transport	membrane	catalytic activity;transporter activity	Pf03030	205.5	20.2	26.2	0.0982968	0.127494	1.29703	2.808	1255.73
M1A989	Ribosomal protein OS=Solanum tuberosum GN=PGSC0003DMG400006846 PE=3 SV=1	29.912	12	118	12	341	37.3	9.16	102605048	LOC102605048; PGSC0003DMG400006846	1	metabolic process	membrane;nucleus;ribosome	RNA binding;structural molecule activity	Pf00687	151.2	61.2	101.9	0.404762	0.673942	1.66503	19.893	2760.2
C3VP56	SnRK2 calcium sensor OS=Nicotiana plumbaginifolia GN=SCaS PE=2 SV=1	45.3521	12	30	12	355	38.767	4.74						metal ion binding	Pf13499	87.2	140.5	101.4	1.61124	1.16284	0.721708	19.535	706.149
A0A068JFR6	Triosephosphate isomerase OS=Nicotiana tabacum PE=2 SV=1	48.2213	12	149	12	253	27.034	5.99				metabolic process		catalytic activity	Pf00121	89.4	99.8	106.3	1.11633	1.18904	1.06513	70.969	4896.72
M0ZV40	Uncharacterized protein OS=Solanum tuberosum GN=PGSC0003DMG400003419 PE=3 SV=1	28.2787	12	80	12	488	54.209	5.1	102593980	LOC102593980; PGSC0003DMG400003419	1	metabolic process;transport		catalytic activity;nucleotide binding;transporter activity	Pf00006, Pf00306, Pf02874	117.6	81.4	74.3	0.692177	0.631803	0.912776	5.813	1945.1
K4CI93	40S ribosomal protein S6 OS=Solanum lycopersicum GN=Solyc08g006040.2 PE=3 SV=1	28.1124	11	34	11	249	28.277	10.7	101257286	LOC101257286; Solyc08g006040.2	8	metabolic process	ribosome	structural molecule activity	Pf01092	93.7	105.7	105.4	1.12807	1.12487	0.997162	17.478	584.122
G5ELZ2	FK506-binding protein OS=Nicotiana tabacum GN=FKBP62 PE=2 SV=1	20.5934	16	26	11	573	63.691	5.27				metabolic process		protein binding	Pf00254, Pf00515, Pf07719, Pf13181, Pf13414, Pf13424, Pf13428, Pf13432, Pf14559	129.3	58.6	71.1	0.45321	0.549884	1.21331	2.652	532.051
O22402	GDP dissociation inhibitor OS=Nicotiana tabacum GN=GDI PE=2 SV=1	29.7297	11	87	11	444	49.671	5.67				regulation of biological process;transport		enzyme regulator activity	Pf00996	90.3	87	84.9	0.963455	0.940199	0.975862	14.317	1588.83
K4BU47	Glucose-6-phosphate isomerase OS=Solanum lycopersicum GN=GPI PE=3 SV=1	17.1799	11	67	11	617	67.665	5.74		Solyc04g076090.2	4	metabolic process;regulation of biological process	cytosol	catalytic activity	Pf00342	94.7	104.6	110.5	1.10454	1.16684	1.05641	2.244	1321.01
A0A0A8IBT8	Glyceraldehyde-3-phosphate dehydrogenase OS=Nicotiana benthamiana GN=NbGAPDH-A PE=2 SV=1	31.1721	14	125	11	401	42.66	7.39				metabolic process		catalytic activity;nucleotide binding	Pf00044, Pf02800	106.3	65.8	76.8	0.619003	0.722484	1.16717	29.2	2898.52
U3PLK3	Leucine aminopeptidase OS=Nicotiana tabacum GN=lap2 PE=2 SV=1	36.8121	23	205	11	527	54.996	5.82				metabolic process	cytoplasm	catalytic activity;metal ion binding	Pf00883, Pf02789	92.6	109.7	106	1.18467	1.14471	0.966272	41.17	6200.52
M1AJF6	Phosphoribulokinase OS=Solanum tuberosum GN=PGSC0003DMG400009317 PE=3 SV=1	35.0617	11	289	11	405	44.838	6.21	102591470	LOC102591470; PGSC0003DMG400009317	8	defense response;metabolic process;response to stimulus	extracellular;membrane	catalytic activity;nucleotide binding	Pf00485	103.4	113.1	110.1	1.09381	1.0648	0.973475	18.573	5376.24
P93393	Ubiquitin activating enzyme E1 OS=Nicotiana tabacum GN=UBA1 PE=2 SV=1	14.3519	14	21	11	1080	120.174	5.58				metabolic process		catalytic activity;nucleotide binding	Pf00899, Pf02134, Pf09358, Pf10585	110.7	60.6	69.4	0.547425	0.62692	1.14521	0.826	475.63
K4B2I9	Uncharacterized protein OS=Solanum lycopersicum GN=Solyc01g106210.2 PE=3 SV=1	16.0059	11	68	11	681	72.925	5.91	101267273	LOC101267273; Solyc01g106210.2	1	metabolic process;response to stimulus	membrane	metal ion binding;nucleotide binding;protein binding	Pf00012, Pf06723	61.9	128.4	114.7	2.07431	1.85299	0.893302	2.849	1256.99
K4B8P9	Uncharacterized protein OS=Solanum lycopersicum GN=Solyc02g076720.2 PE=3 SV=1	14.599	19	121	11	1459	159.796	5.43		Solyc02g076720.2	2	metabolic process		catalytic activity	Pf00586, Pf02769, Pf13507	100.3	106	104.8	1.05683	1.04487	0.988679	2.849	3584.84
K4BMW3	Uncharacterized protein OS=Solanum lycopersicum GN=Solyc03g121640.2 PE=3 SV=1	19.1972	11	14	11	573	60.717	7.36	101265626	LOC101265626; Solyc03g121640.2	3	metabolic process;response to stimulus	cytoplasm;membrane	nucleotide binding	Pf00118	101	73.3	81.3	0.725743	0.80495	1.10914	1.198	320.85
K4CJ85	Uncharacterized protein OS=Solanum lycopersicum GN=Solyc08g014550.2 PE=4 SV=1	45.8763	11	51	11	194	21.978	9.58	101257196	LOC101257196; Solyc08g014550.2	8	metabolic process	cytosol;membrane;ribosome;vacuole	RNA binding;structural molecule activity	Pf00347	93.9	111.4	113.1	1.18637	1.20447	1.01526	57.78	1203.94
K4DFA0	Uncharacterized protein OS=Solanum lycopersicum GN=Solyc12g043120.1 PE=3 SV=1	12.5296	11	16	11	846	92.938	5.33	101265903	LOC101265903; Solyc12g043120.1	12			nucleotide binding	Pf00012	113.8	75.9	80.3	0.66696	0.705624	1.05797	0.986	389.108
M1CM45	Uncharacterized protein OS=Solanum tuberosum GN=PGSC0003DMG400027374 PE=4 SV=1	44.0476	11	70	11	168	19.795	5.4	102603904	LOC102603904; PGSC0003DMG400027374	11	metabolic process;transport		transporter activity	Pf05873	101.8	68.6	88	0.67387	0.86444	1.2828	53.117	1315.23
A0A077D9P0	40S ribosomal protein S17-like protein OS=Nicotiana tabacum PE=2 SV=1	49.3056	10	38	10	144	16.24	9.95				metabolic process	ribosome	structural molecule activity	Pf00833	89.4	112.4	108.4	1.25727	1.21253	0.964413	277.256	556.311
Q2VCI3	60S ribosomal protein L7A-like OS=Solanum tuberosum PE=2 SV=1	27.7992	10	44	10	259	29.353	10.3					ribosome		Pf01248	108.3	92.5	111.9	0.854109	1.03324	1.20973	9	724.604
A1KYB0	Adenosylhomocysteinase OS=Nicotiana tabacum GN=SAHH2 PE=2 SV=1	24.1237	10	21	10	485	53.086	5.77				metabolic process;transport		catalytic activity	Pf00670, Pf02254, Pf02826, Pf05221, Pf13241	101.8	80.2	81.5	0.787819	0.800589	1.01621	2.914	633.074
A0A0A7AEQ3	Carotenoid cleavage dioxygenase 1 OS=Nicotiana sylvestris GN=CCD1 PE=2 SV=1	20.4044	10	36	10	544	61.002	6.7	104212927	LOC104212927		metabolic process		catalytic activity	Pf03055	104.2	94.7	89.3	0.908829	0.857006	0.942978	3.329	856.248
E1AXT8	Glycolate oxidase OS=Nicotiana benthamiana GN=GOX PE=2 SV=1	24.5283	10	23	10	371	40.57	9				metabolic process		catalytic activity;nucleotide binding	Pf00478, Pf01070, Pf01645, Pf03060	66.3	97.9	104.4	1.47662	1.57466	1.06639	2.775	497.737
Q1W375	Phosphomannomutase OS=Nicotiana tabacum PE=2 SV=1	35.3175	10	48	10	252	28.557	6.05				metabolic process	cytoplasm	catalytic activity	Pf03332, Pf08282	77.9	111	83.9	1.4249	1.07702	0.755856	12.111	1167.61
C3RXI5	Plastid transketolase OS=Nicotiana tabacum PE=2 SV=1	36.1559	22	416	10	744	80.051	6.61				metabolic process		catalytic activity	Pf00456, Pf02779, Pf02780	78.2	100.2	151.6	1.28133	1.93862	1.51297	23.851	9450.6
K4AV63	Uncharacterized protein OS=Solanum lycopersicum GN=Solyc01g028810.2 PE=3 SV=1	28.3806	18	96	10	599	62.953	5.87	101253117	LOC101253117; Solyc01g028810.2	1	metabolic process	cytoplasm	nucleotide binding	Pf00118	125.2	72.6	88	0.579872	0.702875	1.21212	5.683	2458.1
K4AXJ0	Uncharacterized protein OS=Solanum lycopersicum GN=Solyc01g079450.2 PE=4 SV=1	12.7812	10	39	10	978	108.918	6.48		Solyc01g079450.2	1	metabolic process		catalytic activity	Pf00326, Pf01738	86.7	109.4	106.1	1.26182	1.22376	0.969835	1.346	1042.11
K4BKR7	Uncharacterized protein OS=Solanum lycopersicum GN=Solyc03g114150.2 PE=3 SV=1	21.1215	15	115	10	535	58.298	7.74	101250104	LOC101250104; Solyc03g114150.2	3	metabolic process;response to stimulus		catalytic activity;nucleotide binding	Pf00171, Pf07368	95.4	110.2	96.2	1.15514	1.00839	0.872958	8.326	2722.96
K4C945	Uncharacterized protein OS=Solanum lycopersicum GN=Solyc06g073260.2 PE=4 SV=1	20.5805	10	62	10	379	42.425	7.87	101253094	LOC101253094; Solyc06g073260.2	6	cell communication;cell organization and biogenesis;defense response;metabolic process;regulation of biological process;response to stimulus	extracellular;membrane;ribosome;vacuole	catalytic activity	Pf01370, Pf13460	105.9	96.3	125	0.909348	1.18036	1.29803	4.623	836.482
K4CQW8	Uncharacterized protein OS=Solanum lycopersicum GN=Solyc09g009390.2 PE=4 SV=1	32.3326	10	98	10	433	46.992	6.02	101264360	LOC101264360; Solyc09g009390.2	9	cellular homeostasis;metabolic process;regulation of biological process;response to stimulus	cytosol;extracellular;membrane;organelle lumen	catalytic activity;nucleotide binding	Pf00070, Pf04820, Pf07992	60.4	105.2	116.9	1.74172	1.93543	1.11122	5.404	2233.41
K4D5C2	Uncharacterized protein OS=Solanum lycopersicum GN=Solyc11g008620.1 PE=4 SV=1	26.1111	10	88	10	360	39.613	8.15	101249417	LOC101249417; Solyc11g008620.1	11	metabolic process		catalytic activity	Pf00702, Pf13242, Pf13344	145	67.5	102.4	0.465517	0.706207	1.51704	14.199	2360.83
M1AE33	Uncharacterized protein OS=Solanum tuberosum GN=PGSC0003DMG400008050 PE=3 SV=1	17.027	11	24	10	740	82.037	6.15	102591285	LOC102591285; PGSC0003DMG400008050	11	metabolic process;regulation of biological process;response to stimulus		catalytic activity;metal ion binding	Pf04551	119.8	87.6	106	0.731219	0.884808	1.21005	1.031	572.316
M1D7F6	Uncharacterized protein OS=Solanum tuberosum GN=PGSC0003DMG400033683 PE=4 SV=1	23.5431	10	33	10	429	47.079	5.85	102599024	LOC102599024; PGSC0003DMG400033683	3	cell communication;metabolic process;response to stimulus	cytoplasm	catalytic activity	Pf01180	83.8	102.9	92	1.22792	1.09785	0.894072	5.31	838.912
M1CMJ2	Xylose isomerase OS=Solanum tuberosum GN=PGSC0003DMG400027477 PE=3 SV=1	21.8295	10	61	10	481	53.517	5.31	102582159	LOC102582159; PGSC0003DMG400027477	7	metabolic process	endoplasmic reticulum;Golgi;membrane;vacuole	catalytic activity;metal ion binding	Pf01261	75.2	129.1	107.7	1.71676	1.43218	0.834237	4.412	1572.02
E5KCJ8	Ycf3-interacting protein 1, chloroplastic OS=Nicotiana tabacum PE=1 SV=2	32.6996	10	43	10	263	29.561	4.64					membrane			130.1	88.9	98.3	0.683321	0.755573	1.10574	45.416	857.983
P93343	14-3-3-like protein C OS=Nicotiana tabacum PE=1 SV=1	54.2308	15	99	9	260	29.346	4.84						protein binding	Pf00244	105.9	82	91.6	0.774315	0.864967	1.11707	45.416	2860.67
Q0PWS5	Chloroplast pigment-binding protein CP26 OS=Nicotiana tabacum GN=Lhcb5 PE=2 SV=1	23.8596	9	24	9	285	30.428	6.01				metabolic process	membrane	metal ion binding	Pf00504	201.6	19.1	22.8	0.0947421	0.113095	1.19372	2.36	494.361
A0A0A8K9V3	Geranylgeranyl reductase OS=Nicotiana benthamiana GN=chlP PE=2 SV=1	23.7069	9	22	9	464	51.291	9.04				metabolic process		catalytic activity	Pf01494, Pf05669	121.5	80.3	79.2	0.660905	0.651852	0.986301	1.683	541.879
Q2WGN6	Glycerophosphodiesterase-like protein OS=Nicotiana tabacum GN=NtGPDL PE=2 SV=1	12.367	10	49	9	752	81.954	5.57				metabolic process		catalytic activity	Pf03009	95.2	115.7	104.6	1.21534	1.09874	0.904062	2.875	1304.4
W6KDG8	Green fluorescent protein OS=Nicotiana benthamiana GN=gfp PE=4 SV=1	31.5126	9	163	9	238	26.897	6.23				metabolic process			Pf01353	35.2	38.3	29.7	1.08807	0.84375	0.775457	55.234	2620.37
Q9XQP4	NAD-malate dehydrogenase OS=Nicotiana tabacum PE=2 SV=1	28.6408	10	49	9	412	43.28	7.88				metabolic process		catalytic activity	Pf00056, Pf01073, Pf02866	94.6	102.4	110.6	1.08245	1.16913	1.08008	4.505	1298.17
Q9XIV8	Peroxidase N1 OS=Nicotiana tabacum GN=poxN1 PE=1 SV=1	34.2424	9	38	9	330	35.709	7.66				metabolic process;response to stimulus	extracellular	antioxidant activity;catalytic activity;metal ion binding	Pf00141	40.8	65.1	87.6	1.59559	2.14706	1.34562	2.899	1059.42
D2CNC6	Subtilase OS=Nicotiana tabacum GN=SBT1.2A PE=4 SV=1	16.3185	9	24	9	766	82.792	7.61				metabolic process;regulation of biological process		catalytic activity;protein binding	Pf00082, Pf05922	78	129.7	97.5	1.66282	1.25	0.751735	1.239	658.435
K4B0D3	Uncharacterized protein OS=Solanum lycopersicum GN=Solyc01g097460.2 PE=3 SV=1	37.2014	9	196	9	293	31.128	6.42	101264255	LOC101264255; Solyc01g097460.2	1	defense response;metabolic process;response to stimulus	membrane	catalytic activity	Pf00455, Pf06026	112.6	108.7	106	0.965364	0.941385	0.975161	32.598	5530.42
K4B0Q1	Uncharacterized protein OS=Solanum lycopersicum GN=Solyc01g098640.2 PE=4 SV=1	28.7197	9	45	9	289	31.573	7.33	101258104	LOC101258104; Solyc01g098640.2	1	metabolic process		catalytic activity	Pf04536	179.1	31.3	41.8	0.174763	0.233389	1.33546	7.799	1231.72
K4B924	Uncharacterized protein OS=Solanum lycopersicum GN=Solyc02g077990.2 PE=3 SV=1	29.8361	9	28	9	305	33.351	8.9	101255358	LOC101255358; Solyc02g077990.2	2	metabolic process;response to stimulus	membrane;nucleus;ribosome	RNA binding;structural molecule activity	Pf03719	147.8	64	85.5	0.433018	0.578484	1.33594	7.859	773.556
K4BT19	Uncharacterized protein OS=Solanum lycopersicum GN=Solyc04g063290.2 PE=3 SV=1	33.5714	9	50	9	280	30.557	10.27	101254082	LOC101254082; Solyc04g063290.2	4	metabolic process	cytosol;membrane;ribosome	RNA binding;structural molecule activity	Pf00333, Pf03719	91.2	113.5	109.5	1.24452	1.20066	0.964758	6.079	1384.53
K4CMQ6	Uncharacterized protein OS=Solanum lycopersicum GN=Solyc08g075390.2 PE=4 SV=1	12.7714	9	28	9	783	88.487	5.15	101253517	LOC101253517; Solyc08g075390.2	8	metabolic process	vacuole	catalytic activity	Pf00293	95.4	113.4	107.1	1.18868	1.12264	0.944444	1.154	609.069
K4CNS6	Uncharacterized protein OS=Solanum lycopersicum GN=Solyc08g079180.2 PE=3 SV=1	16.8996	9	21	9	787	86.444	5.62	101245683	LOC101245683; Solyc08g079180.2	8	cell organization and biogenesis;metabolic process	extracellular;mitochondrion	catalytic activity;nucleotide binding;RNA binding	Pf00009, Pf00679, Pf01926, Pf03144, Pf03764, Pf14492	187.9	59.7	59.2	0.317722	0.315061	0.991625	1.024	569.317
M1BQ55	Uncharacterized protein OS=Solanum tuberosum GN=PGSC0003DMG400019568 PE=4 SV=1	39.7727	9	59	9	264	28.669	6.96	102600885	LOC102600885; PGSC0003DMG400019568	7				Pf07876	104	99.5	101.1	0.956731	0.972115	1.01608	26.384	1187.59
M1C4Z7	Uncharacterized protein OS=Solanum tuberosum GN=PGSC0003DMG400023334 PE=3 SV=1	19.8157	9	21	9	434	49.655	6.25	102580607	LOC102580607; PGSC0003DMG400023334	5	metabolic process	cytoplasm;membrane	catalytic activity;metal ion binding;nucleotide binding;RNA binding	Pf01409, Pf03147	132.7	79.5	85.4	0.599096	0.643557	1.07421	1.512	396.459
M1CCF2	Uncharacterized protein OS=Solanum tuberosum GN=PGSC0003DMG400025052 PE=4 SV=1	24.3802	9	29	9	242	27.651	8.66	102606142	LOC102606142; PGSC0003DMG400025052	4	development		metal ion binding		136.2	49.6	59.8	0.36417	0.43906	1.20565	10.659	549.363
M1CXP4	Uncharacterized protein OS=Solanum tuberosum GN=PGSC0003DMG400029938 PE=3 SV=1	16.0386	19	315	9	1035	112.828	6.98		PGSC0003DMG400029938	8	metabolic process;response to stimulus	extracellular	catalytic activity;nucleotide binding	Pf02347	82.4	135.9	108.2	1.64927	1.31311	0.796174	7.405	7061.93
K4CMT7	60S ribosomal protein L13 OS=Solanum lycopersicum GN=Solyc08g075700.2 PE=3 SV=1	26.2136	8	57	8	206	23.586	11.17	101264241	LOC101264241; Solyc08g075700.2	8	metabolic process	membrane;ribosome	structural molecule activity	Pf01294	94.9	108.7	111.2	1.14542	1.17176	1.023	16.013	928.737
Q9FVE9	Aconitate hydratase OS=Nicotiana tabacum GN=ACO PE=2 SV=1	26.6147	20	194	8	898	98.008	6.29				metabolic process		catalytic activity;metal ion binding	Pf00330, Pf00694	58.5	112.6	113.9	1.92479	1.94701	1.01155	8.152	4545.18
A0A0F6P9E3	Aldehyde dehydrogenase 1 OS=Capsicum annuum GN=ALDH1 PE=2 SV=1	16.8	8	38	8	500	54.835	6.28				metabolic process		catalytic activity	Pf00171	37.5	115.5	143.4	3.08	3.824	1.24156	1.31	696.228
M1CRA7	Alpha-1,4 glucan phosphorylase OS=Solanum tuberosum GN=PGSC0003DMG400028382 PE=3 SV=1	11.0769	8	25	8	975	110.82	5.38		PGSC0003DMG400028382	5	metabolic process		catalytic activity	Pf00343	64	113.3	140.7	1.77031	2.19844	1.24184	0.573	676.778
C3PTS5	Aspartic protease OS=Nicotiana tabacum PE=2 SV=1	18.8976	8	39	8	508	54.745	5.85				metabolic process		catalytic activity	Pf00026, Pf03489, Pf05184, Pf14543	70.9	87.7	99.9	1.23695	1.40903	1.13911	2.914	1107
C5J0G6	Enolase OS=Nicotiana tabacum PE=2 SV=1	62.3874	20	570	8	444	47.798	5.57				metabolic process		catalytic activity;metal ion binding	Pf00113, Pf03952	89.1	106.9	114.4	1.19978	1.28395	1.07016	183.785	16888.2
O81101	Glutamate decarboxylase OS=Nicotiana tabacum GN=NtGAD2 PE=2 SV=1	20.7661	11	54	8	496	55.895	5.81				metabolic process		catalytic activity	Pf00282	60.5	136.7	132.8	2.2595	2.19504	0.97147	6.667	1237.1
Q94KK8	Glutamate decarboxylase OS=Nicotiana tabacum PE=2 SV=1	20.3666	9	54	8	491	55.915	5.85				metabolic process		catalytic activity	Pf00282	39.7	145.5	135.5	3.66499	3.4131	0.931271	4.736	1379.39
Q6TBQ2	Glycinamide ribonucleotide synthetase OS=Nicotiana tabacum PE=2 SV=1	19.4175	8	11	8	515	54.713	5.99				metabolic process		catalytic activity;metal ion binding;nucleotide binding	Pf01071, Pf02222, Pf02843, Pf02844, Pf07478, Pf08442, Pf13535, Pf15632	106.2	97.3	108.4	0.916196	1.02072	1.11408	0.911	289.696
A0A075EZS4	Glyoxisomal malate dehydrogenase OS=Nicotiana tabacum GN=gMDH PE=2 SV=1	37.535	11	109	8	357	37.546	8.15				metabolic process		catalytic activity	Pf00056, Pf02866	120	91.8	88.5	0.765	0.7375	0.964052	23.041	2797.36
I7GVS5	Heat shock protein 70 OS=Nicotiana tabacum GN=NtHsp70 PE=2 SV=1	44.53	28	347	8	649	71.06	5.25				response to stimulus		nucleotide binding	Pf00012, Pf06723	59.3	112.5	111.4	1.89713	1.87858	0.990222	135.501	7755.76
W8SRK9	Imidazole glycerol phosphate synthase OS=Nicotiana tabacum PE=2 SV=1	14.5	8	12	8	600	65.225	7.69				metabolic process	cytoplasm	catalytic activity	Pf00117, Pf00977, Pf01174, Pf02548, Pf07685	102.9	79.6	91.6	0.773567	0.890185	1.15075	0.983	231.72
Q9M7J4	MAR-binding filament-like protein 1-1 OS=Nicotiana tabacum GN=MFP1-1 PE=2 SV=1	19.6676	15	29	8	722	82.11	5.45				cell organization and biogenesis;transport	cytoskeleton;nucleus	DNA binding;transporter activity	Pf01496, Pf06160, Pf12128, Pf13166	165.8	63.9	58.8	0.385404	0.354644	0.920188	1.884	509.04
K4BZA6	NADH-cytochrome b5 reductase OS=Solanum lycopersicum GN=Solyc05g018520.2 PE=3 SV=1	20.4334	8	33	8	323	35.454	8.81	101244772	LOC101244772; Solyc05g018520.2	5	metabolic process;response to stimulus	Golgi	catalytic activity;metal ion binding	Pf00175, Pf00970	67.4	132.4	116	1.96439	1.72107	0.876133	3.642	480.208
Q42961	Phosphoglycerate kinase, chloroplastic OS=Nicotiana tabacum PE=2 SV=1	57.3805	24	158	8	481	50.146	8.38				metabolic process		catalytic activity;nucleotide binding	Pf00162	84.2	140.5	85.6	1.66865	1.01663	0.609253	28.552	3941.31
I6N953	Photosystem II CP43 reaction center protein OS=Datura stramonium GN=psbC PE=3 SV=1	18.3932	8	36	8	473	51.907	7.21	13230307	psbC		metabolic process	membrane	metal ion binding	Pf00421	211.4	28.5	34.9	0.134816	0.16509	1.22456	6.499	992.63
M1DZ44	Photosystem II CP47 reaction center protein OS=Solanum tuberosum GN=PGSC0003DMG400046303 PE=3 SV=1	16.2037	8	59	8	648	71.133	6.84		PGSC0003DMG400046303	1	metabolic process	membrane		Pf00421	194.9	46.9	45.6	0.240636	0.233966	0.972281	10.007	2011.5
B1NYI4	Phytoene desaturase OS=Nicotiana benthamiana GN=PDS PE=2 SV=1	16.3823	8	19	8	586	65.372	6.74				metabolic process		catalytic activity	Pf00890, Pf01266, Pf01593, Pf01946, Pf07992, Pf13450	148.9	73	86.6	0.490262	0.581598	1.1863	1.154	338.498
E5L8B5	Plastid thioredoxin M OS=Nicotiana tabacum PE=2 SV=1	34.0659	9	146	8	182	19.624	9				cellular homeostasis;metabolic process;regulation of biological process		catalytic activity	Pf00085, Pf08534, Pf13098, Pf13899, Pf13905, Pf14595	131.9	83.6	93.4	0.633813	0.708112	1.11722	99	3800.39
Q84QE4	Putative chloroplast thiazole biosynthetic protein OS=Nicotiana tabacum GN=ThiI PE=2 SV=1	29.6089	8	119	8	358	37.947	6.16				metabolic process;response to stimulus	cytosol	catalytic activity;metal ion binding	Pf00890, Pf01266, Pf01946, Pf03486, Pf05834, Pf07992, Pf12831, Pf13450, Pf13454	213.3	43.2	81.7	0.202532	0.383029	1.8912	25.367	4428.59
A0A076L1Z5	Remorin 2 OS=Nicotiana tabacum PE=2 SV=1	34.4828	8	14	8	174	19.096	8.81							Pf03763	175.1	49.9	53.4	0.28498	0.304969	1.07014	4.412	190.359
A0A075F2H0	Succinic semialdehyde reductase isoform 1 OS=Nicotiana tabacum GN=SSR1 PE=2 SV=1	39.0411	8	63	8	292	30.693	6.15				metabolic process		catalytic activity;nucleotide binding	Pf02558, Pf03435, Pf03446, Pf03807, Pf14833	105.4	99	105.4	0.939279	1	1.06465	34.938	2608.24
Q9AXU4	Threonine dehydratase OS=Nicotiana attenuata GN=THD1_NICAT PE=2 SV=1	18.3028	8	22	8	601	65.604	6.29				metabolic process		catalytic activity	Pf00291, Pf00585	66.5	129.7	122	1.95038	1.83459	0.940632	1.154	549.735
K4B2L1	Uncharacterized protein OS=Solanum lycopersicum GN=Solyc01g106430.2 PE=4 SV=1	30.6897	10	149	8	290	32.363	6.43	101253833	LOC101253833; Solyc01g106430.2	1	defense response;metabolic process;response to stimulus	cytoplasm	catalytic activity;metal ion binding	Pf00719	100.3	117	107.3	1.1665	1.06979	0.917094	152.993	3620.55
K4BBJ8	Uncharacterized protein OS=Solanum lycopersicum GN=Solyc02g086910.2 PE=4 SV=1	25.0554	8	84	8	451	49.256	5.11	101249229	LOC101249229; Solyc02g086910.2	2	defense response;metabolic process;response to stimulus	membrane	catalytic activity	Pf00160	105.3	124	92.3	1.17759	0.876543	0.744355	4.995	2464.22
K4BJC4	Uncharacterized protein OS=Solanum lycopersicum GN=Solyc03g097070.2 PE=4 SV=1	21.9697	8	12	8	396	43.953	4.89	101256571	LOC101256571; Solyc03g097070.2	3	transport	cytosol;membrane		Pf00790, Pf03127	90.6	72	68.2	0.794702	0.752759	0.947222	1.754	272.073
K4BKV2	Uncharacterized protein OS=Solanum lycopersicum GN=Solyc03g114500.2 PE=3 SV=1	20.2869	8	46	8	488	52.096	6.46	101267392	LOC101267392; Solyc03g114500.2	3	cell organization and biogenesis;metabolic process		catalytic activity;metal ion binding	Pf00113, Pf03952, Pf13378	64.7	114.7	126.1	1.7728	1.949	1.09939	1.762	1278.13
K4BLS5	Uncharacterized protein OS=Solanum lycopersicum GN=Solyc03g117740.2 PE=4 SV=1	31.1258	8	38	8	302	32.833	7.74	101253367	LOC101253367; Solyc03g117740.2	3	metabolic process	extracellular	catalytic activity		103	108.5	97	1.0534	0.941748	0.894009	4.623	1115.3
K4CA57	Uncharacterized protein OS=Solanum lycopersicum GN=Solyc06g081980.1 PE=3 SV=1	27.5081	9	78	8	309	33.139	6.32	101257782	LOC101257782; Solyc06g081980.1	6	metabolic process;response to stimulus	cytosol	catalytic activity;protein binding	Pf00218, Pf01207, Pf01680	112.6	88.4	107	0.78508	0.950266	1.21041	16.783	2422.38
K4CEJ1	Uncharacterized protein OS=Solanum lycopersicum GN=Solyc07g043320.2 PE=4 SV=1	13.6334	18	72	8	1511	170.115	4.77	101256605	LOC101256605; Solyc07g043320.2	7	response to stimulus	membrane		Pf00261, Pf05667, Pf12128, Pf13166	80.8	105.6	111.8	1.30693	1.38366	1.05871	0.915	1106
K4CNS0	Uncharacterized protein OS=Solanum lycopersicum GN=Solyc08g079110.2 PE=4 SV=1	39.0152	8	48	8	264	28.155	8.29		Solyc08g079110.2	8		membrane		Pf00805, Pf13599	112.8	95.1	100.4	0.843085	0.890071	1.05573	17.957	1518.53
K4D3B5	Uncharacterized protein OS=Solanum lycopersicum GN=Solyc10g083280.1 PE=3 SV=1	36.6667	8	46	8	150	16.335	10.7	101256436; 101247549	LOC101256436; LOC101247549; Solyc10g083280.1; Solyc09g010100.2	10; 9	metabolic process	cytosol;membrane;ribosome	structural molecule activity	Pf00411	96.2	105.5	104.8	1.09667	1.0894	0.993365	73.989	1026.73
M1AH87	Uncharacterized protein OS=Solanum tuberosum GN=PGSC0003DMG400008847 PE=4 SV=1	7.9653	8	16	8	1268	137.592	6.01	102582244	LOC102582244; PGSC0003DMG400008847	9	metabolic process	cytosol	catalytic activity	Pf01968, Pf02538, Pf05378	70.5	119.6	101.5	1.69645	1.43972	0.848662	0.596	481.575
B3F8G9	1-hydroxy-2-methyl-2-(E)-butenyl 4-diphosphate reductase OS=Nicotiana langsdorffii x Nicotiana sanderae PE=2 SV=1	15.8351	7	15	7	461	51.687	5.82				metabolic process		catalytic activity;metal ion binding	Pf02401	188.9	50.9	57.8	0.269455	0.305982	1.13556	1.31	211.747
Q762F2	14-3-3 protein OS=Nicotiana tabacum GN=Nt14-3-3kappa2 PE=3 SV=1	48.0159	10	42	7	252	28.533	4.72						protein binding	Pf00244	90.6	73.7	85	0.813466	0.93819	1.15332	6.079	970.88
Q285L8	40S ribosomal protein S3a OS=Nicotiana tabacum GN=cyc07 PE=2 SV=1	44.4444	11	50	7	261	29.709	9.72				metabolic process	cytoplasm;ribosome	structural molecule activity	Pf01015	86.2	117.6	112.9	1.36427	1.30974	0.960034	19.691	1153.52
K4C7I8	60S ribosomal protein L18a OS=Solanum lycopersicum GN=Solyc06g065590.2 PE=3 SV=1	28.6517	7	27	7	178	21.415	10.26	101245264	LOC101245264; Solyc06g065590.2	6	metabolic process	cytosol;membrane;ribosome	structural molecule activity	Pf01775	95.7	104.6	108.9	1.093	1.13793	1.04111	6.197	517.282
B1Q486	Aconitate hydratase OS=Capsicum chinense PE=2 SV=1	21.809	19	233	7	995	108.332	7.43				metabolic process		catalytic activity;metal ion binding	Pf00330, Pf00694	60	113.1	117.9	1.885	1.965	1.04244	8.249	5415.82
A0A075EYT4	Acyl-coenzyme A oxidase OS=Nicotiana tabacum PE=2 SV=1	16.2651	10	43	7	664	74.348	7.96				metabolic process		catalytic activity;nucleotide binding	Pf01756, Pf02770, Pf14749	40.1	172	106.4	4.28928	2.65337	0.618605	2.7	901.847
M1CXI6	Aspartate aminotransferase OS=Solanum tuberosum GN=PGSC0003DMG400029897 PE=3 SV=1	29.2208	10	45	7	462	50.807	8.54		PGSC0003DMG400029897	8	metabolic process;response to stimulus	extracellular	catalytic activity	Pf00155, Pf08326	109.2	97.2	119.8	0.89011	1.09707	1.23251	3.437	1058.63
A8Y664	ATP synthase subunit beta (Fragment) OS=Solanum sisymbriifolium GN=atpB PE=3 SV=1	85.7143	25	954	7	336	35.937	5.41				metabolic process;transport	membrane	catalytic activity;nucleotide binding;transporter activity	Pf00006, Pf02874	122.9	95.2	92.7	0.774614	0.754272	0.973739	5622.41	23328
Q9FR00	Avr9/Cf-9 rapidly elicited protein 31 OS=Nicotiana tabacum GN=ACRE31 PE=2 SV=1	41.4634	7	11	7	205	23.038	4.69						metal ion binding	Pf00036, Pf13202, Pf13405, Pf13499, Pf13833	29.4	160.8	121.2	5.46939	4.12245	0.753731	3.394	178.491
O82151	Beta-D-glucan exohydrolase OS=Nicotiana tabacum PE=2 SV=1	19.586	10	20	7	628	68.401	8.9				metabolic process		catalytic activity	Pf00933, Pf01915	116.9	66.4	60.9	0.568007	0.520958	0.917169	2.275	490.647
A0A077DBL2	Chaperonin 21 OS=Nicotiana tabacum PE=2 SV=1	32.9365	9	74	7	252	26.354	8.44				metabolic process	cytoplasm	nucleotide binding	Pf00166	117.4	88.4	97.7	0.752981	0.832198	1.1052	15.238	1558.49
Q3C1I8	Cytochrome f OS=Nicotiana sylvestris GN=petA PE=3 SV=1	30.9375	7	33	7	320	35.224	9.07	3735070	petA		metabolic process;transport	membrane	metal ion binding	Pf01333	139.5	53.3	43.2	0.382079	0.309677	0.810507	2.981	925.873
Q6E7D1	DNA damage-binding protein 1 OS=Solanum cheesmaniae GN=DDB1 PE=3 SV=1	6.94064	7	9	7	1095	122.216	5.26				metabolic process;regulation of biological process;response to stimulus	nucleus	protein binding	Pf03178, Pf10433	100.1	111	99.9	1.10889	0.998002	0.9	0.359	150.566
Q9LEC8	Glutamate dehydrogenase B OS=Nicotiana plumbaginifolia GN=GDHB PE=2 SV=1	28.4672	10	35	7	411	44.48	6.86				metabolic process		catalytic activity	Pf00208, Pf02812	73	120.9	103.2	1.65616	1.4137	0.853598	3.489	857.129
Q5QJB2	Harpin binding protein 1 OS=Nicotiana tabacum GN=HrBP1 PE=2 SV=1	30.7971	9	61	7	276	29.98	8.6						structural molecule activity	Pf04755	143.1	52.7	69.3	0.368274	0.484277	1.31499	14.849	918.597
Q006Q0	Malic enzyme OS=Nicotiana tabacum PE=2 SV=2	21.489	12	89	7	591	65.372	6.24				metabolic process		catalytic activity;metal ion binding;nucleotide binding	Pf00390, Pf03949	38.6	89.6	123.5	2.32124	3.19948	1.37835	3.184	2470.07
B5AQ04	Metacaspase type II (Fragment) OS=Nicotiana tabacum PE=2 SV=1	18.9904	7	14	7	416	45.639	4.97				metabolic process		catalytic activity	Pf00656	83.8	88	87.9	1.05012	1.04893	0.998864	2.548	315.8
F2VJF4	Miraculin-like protein OS=Nicotiana benthamiana GN=Mir3 PE=2 SV=1	30.7317	7	14	7	205	22.825	8.41				regulation of biological process		enzyme regulator activity	Pf00197	29.3	123.8	64.9	4.22526	2.21502	0.524233	5.813	336.54
U3RE33	Monodehydroascorbate reductase OS=Nicotiana tabacum PE=2 SV=1	18.2008	7	34	7	478	52.024	8.03				metabolic process		catalytic activity;nucleotide binding	Pf00070, Pf01266, Pf07992	83	108.2	108.9	1.30361	1.31205	1.00647	1.512	1029.2
Q76G13	Nitrite reductase OS=Nicotiana tabacum GN=nii2 PE=2 SV=1	22.3169	12	72	7	587	65.756	7.28				metabolic process		catalytic activity	Pf01077, Pf03460	102.7	87.9	98.9	0.855891	0.962999	1.12514	2.262	1725.04
Q76KB0	Nitrite reductase OS=Nicotiana tabacum GN=nii3 PE=1 SV=1	35.9455	21	158	7	587	65.574	6.49				metabolic process		catalytic activity;metal ion binding	Pf01077, Pf03460	140.8	77.9	93.1	0.553267	0.661222	1.19512	10.994	4115.85
Q56E62	Nucleoside diphosphate kinase 1 OS=Nicotiana tabacum PE=2 SV=1	44.5946	7	112	7	148	16.286	6.8				metabolic process		catalytic activity;metal ion binding;nucleotide binding	Pf00334	80	121.1	114.5	1.51375	1.43125	0.9455	34.938	3097.09
K4ATJ4	Peptidyl-prolyl cis-trans isomerase OS=Solanum lycopersicum GN=Solyc01g009990.2 PE=3 SV=1	30.6452	9	171	7	248	26.519	9.11	101263049	LOC101263049; Solyc01g009990.2	1	cell organization and biogenesis;metabolic process	membrane	catalytic activity;protein binding	Pf00160	106.1	116.3	90	1.09614	0.848256	0.773861	152.993	3784.48
P27154	Phosphoenolpyruvate carboxylase OS=Nicotiana tabacum GN=PPC PE=2 SV=1	31.9502	27	91	7	964	110.095	5.88				metabolic process	cytoplasm	catalytic activity	Pf00311	81.3	104.7	116.1	1.28782	1.42804	1.10888	3.329	1677.96
O24163	Protoporphyrinogen oxidase, chloroplastic OS=Nicotiana tabacum GN=PPXI PE=2 SV=1	15.6934	8	19	7	548	59.193	9.11				metabolic process		catalytic activity	Pf01593, Pf13450	148.5	68.8	65.3	0.4633	0.439731	0.949128	1.276	379.604
B5LAU8	Putative ferredoxin-dependent glutamate synthase 1 OS=Capsicum annuum PE=2 SV=1	30.1538	41	584	7	1625	177.609	6.54				metabolic process		catalytic activity	Pf00310, Pf01493, Pf01645, Pf04898	109.9	99.7	104.8	0.907188	0.953594	1.05115	17.33	15370.7
D6P3J0	Putative progesterone 5 beta-reductase OS=Nicotiana tabacum PE=2 SV=1	17.0103	7	12	7	388	43.681	5.69				metabolic process		catalytic activity	Pf01370, Pf13460	87.1	89.1	97.5	1.02296	1.1194	1.09428	1.228	216.063
S6A1Z8	S-adenosylmethionine synthase OS=Nicotiana attenuata PE=2 SV=1	34.3511	10	29	7	393	42.999	5.91				metabolic process		catalytic activity;metal ion binding;nucleotide binding	Pf00438, Pf02772, Pf02773	93.4	105.5	105.4	1.12955	1.12848	0.999052	5.7	808.842
K4BCV4	Serine hydroxymethyltransferase OS=Solanum lycopersicum GN=Solyc02g091560.2 PE=3 SV=1	26.834	12	298	7	518	57.196	8.18	101254439	LOC101254439; Solyc02g091560.2	2	metabolic process;response to stimulus	cytosol;extracellular;membrane;nucleus;ribosome	catalytic activity;RNA binding	Pf00155, Pf00464, Pf02142	79.1	105.1	132.8	1.3287	1.67889	1.26356	43.367	6902.93
K4CLC9	Serine hydroxymethyltransferase OS=Solanum lycopersicum GN=Solyc08g065490.2 PE=3 SV=1	13.9313	7	18	7	524	56.958	7.49	101263138	LOC101263138; Solyc08g065490.2	8	metabolic process		catalytic activity	Pf00464	87.1	105	120.3	1.20551	1.38117	1.14571	1.31	369.996
K4BB47	Succinate dehydrogenase [ubiquinone] flavoprotein subunit, mitochondrial OS=Solanum lycopersicum GN=Solyc02g085350.2 PE=3 SV=1	11.7647	7	17	7	629	69.12	6.54	101256641	LOC101256641; Solyc02g085350.2	2	metabolic process;transport	membrane	catalytic activity;metal ion binding;nucleotide binding	Pf00890, Pf02910	81.8	94.8	93.6	1.15892	1.14425	0.987342	1.106	295.02
P11796	Superoxide dismutase [Mn], mitochondrial OS=Nicotiana plumbaginifolia GN=SODA PE=1 SV=1	30.2632	7	52	7	228	25.488	8.13				metabolic process;response to stimulus	mitochondrion;organelle lumen	antioxidant activity;catalytic activity;metal ion binding	Pf00081, Pf02777	77.3	119.3	114.5	1.54334	1.48124	0.959765	30.623	1229.41
K4AZT2	Uncharacterized protein OS=Solanum lycopersicum GN=Solyc01g095430.2 PE=4 SV=1	24.1176	7	38	7	170	17.977	8.92	101248140	LOC101248140; Solyc01g095430.2	1		membrane		Pf14159	186.4	32.7	42	0.175429	0.225322	1.2844	45.416	913.225
K4B8J0	Uncharacterized protein OS=Solanum lycopersicum GN=Solyc02g072160.2 PE=4 SV=1	12.9983	7	27	7	577	63.41	8.5		Solyc02g072160.2	2			catalytic activity	Pf07993, Pf08547, Pf13460	135.2	75.5	78.2	0.558432	0.578402	1.03576	1.297	611.64
K4BBN1	Uncharacterized protein OS=Solanum lycopersicum GN=Solyc02g087240.2 PE=4 SV=1	14.3737	7	15	7	487	53.612	8.03	101268050	LOC101268050; Solyc02g087240.2	2	metabolic process		catalytic activity;nucleotide binding	Pf01512, Pf10531, Pf10589	103.8	84.8	87.2	0.816956	0.840077	1.0283	1.264	329.66
K4BCQ9	Uncharacterized protein OS=Solanum lycopersicum GN=Solyc02g091100.2 PE=3 SV=1	12.892	7	24	7	574	61.595	6.48	101264774	LOC101264774; Solyc02g091100.2	2	metabolic process	cytosol	catalytic activity;metal ion binding	Pf00205, Pf02775, Pf02776	70.4	118.5	108.3	1.68324	1.53835	0.913924	1.352	422.788
K4BXB1	Uncharacterized protein OS=Solanum lycopersicum GN=Solyc05g009370.2 PE=3 SV=1	27.6753	7	42	7	271	28.86	10.62	101255295	LOC101255295; Solyc05g009370.2	5	metabolic process	ribosome	structural molecule activity	Pf00828	135.1	81.6	94.8	0.603997	0.701702	1.16176	3.833	922.482
K4C390	Uncharacterized protein OS=Solanum lycopersicum GN=Solyc06g006080.2 PE=3 SV=1	16.8971	7	14	7	651	72.63	6.49	101264726	LOC101264726; Solyc06g006080.2	6	metabolic process;response to stimulus		catalytic activity	Pf01964, Pf13667	195.1	47	85.5	0.240902	0.438237	1.81915	1.202	369.799
K4D5V2	Uncharacterized protein OS=Solanum lycopersicum GN=Solyc11g011470.1 PE=4 SV=1	13.1258	7	12	7	739	79.856	6.24	101263481	LOC101263481; Solyc11g011470.1	11	metabolic process;response to stimulus	membrane	catalytic activity	Pf00111, Pf00384, Pf09326, Pf10588, Pf13510	107.8	86	80.6	0.797774	0.747681	0.937209	0.778	320.214
K4D9K1	Uncharacterized protein OS=Solanum lycopersicum GN=Solyc11g065920.1 PE=4 SV=1	4.5388	7	8	7	1366	150.525	6.7	101252457	LOC101252457; Solyc11g065920.1	11	metabolic process;response to stimulus	cytosol	catalytic activity;metal ion binding;nucleotide binding	Pf00941, Pf01315, Pf01799, Pf02738, Pf03450	85.6	101.8	98	1.18925	1.14486	0.962672	0.252	198.325
M1A0X0	Uncharacterized protein OS=Solanum tuberosum GN=PGSC0003DMG400004789 PE=4 SV=1	15.2174	7	18	7	598	67.022	8.54	102581894	LOC102581894; PGSC0003DMG400004789	8	cell growth;cell organization and biogenesis;metabolic process	extracellular;membrane	catalytic activity;metal ion binding	Pf00394, Pf07731, Pf07732	113.2	108.7	95.7	0.960247	0.845406	0.880405	1.009	356.28
M1C4U3	Uncharacterized protein OS=Solanum tuberosum GN=PGSC0003DMG400023281 PE=4 SV=1	25.4125	7	54	7	303	32.92	4.58		PGSC0003DMG400023281	11	cell organization and biogenesis;transport	membrane			104.7	99.2	93.7	0.947469	0.894938	0.944556	13.678	1332.7
M1D249	Uncharacterized protein OS=Solanum tuberosum GN=PGSC0003DMG400030998 PE=4 SV=1	19.0722	7	55	7	388	41.008	6.98	102604604	LOC102604604; PGSC0003DMG400030998	5	metabolic process;response to stimulus	extracellular	catalytic activity;metal ion binding	Pf00107, Pf08240, Pf13602	111	101.8	113.7	0.917117	1.02432	1.1169	2.03	1849.78
M1D7P1	Uncharacterized protein OS=Solanum tuberosum GN=PGSC0003DMG400033906 PE=4 SV=1	27.5974	7	20	7	308	33.809	6.37		PGSC0003DMG400033906	10				Pf01073, Pf01370, Pf02254, Pf03435, Pf05368, Pf07993, Pf08659, Pf13460	78.2	123	104.6	1.57289	1.3376	0.850407	2.981	603.475
M1E0E5	Uncharacterized protein OS=Solanum tuberosum GN=PGSC0003DMG400046906 PE=4 SV=1	13.6964	7	14	7	606	67.323	5.29		PGSC0003DMG400046906	1	metabolic process		catalytic activity;nucleotide binding	Pf00155, Pf00266, Pf00724, Pf01041, Pf01053, Pf06838	83.7	128.7	113.3	1.53763	1.35364	0.880342	0.84	258.169
Q75ZE5	14-3-3 a-1 protein OS=Nicotiana tabacum GN=14-3-3 a-1 PE=2 SV=1	56.0784	15	102	6	255	28.747	4.78						protein binding	Pf00244	98	77.1	90.1	0.786735	0.919388	1.16861	112.646	2422.15
Q08935	29 kDa ribonucleoprotein A, chloroplastic OS=Nicotiana sylvestris PE=2 SV=1	31.8681	6	23	6	273	29.657	4.87	104230409	CP29A		metabolic process		nucleotide binding;RNA binding	Pf00076, Pf13893, Pf14259	186.6	47.1	62.7	0.252412	0.336013	1.33121	4.623	508.625
P19683	31 kDa ribonucleoprotein, chloroplastic OS=Nicotiana sylvestris PE=1 SV=1	32.0635	6	112	6	315	35.027	4.65	104227036	LOC104227036		metabolic process		nucleotide binding;RNA binding	Pf00076, Pf13893, Pf14259	122	96.8	108.1	0.793443	0.886066	1.11674	14.399	3275.08
Q08948	33 kd chloroplast ribonucleoprotein OS=Nicotiana sylvestris PE=4 SV=1	23.1975	6	21	6	319	34.778	4.77	104214985	LOC104214985				nucleotide binding	Pf00076, Pf13893, Pf14259	157.1	69.6	86.2	0.44303	0.548695	1.23851	4.817	412.73
F5BFS9	Alpha-galactosidase OS=Nicotiana tabacum PE=3 SV=1	18.1598	7	23	6	413	45.496	6.44				metabolic process		catalytic activity	Pf02065, Pf10566	107.6	123.4	95.2	1.14684	0.884758	0.771475	1.712	588.443
J9Z324	Ascorbate peroxidase OS=Capsicum frutescens GN=APX PE=2 SV=1	28.5714	8	37	6	287	31.594	7.58				metabolic process;response to stimulus		antioxidant activity;catalytic activity	Pf00141	116.2	45.6	52.4	0.392427	0.450947	1.14912	4.179	839.106
J7HAR8	ATP synthase epsilon chain, chloroplastic OS=Capsicum annuum GN=atpE PE=3 SV=1	60.9023	7	54	6	133	14.597	5.54	13540224	atpE		metabolic process;transport	membrane	catalytic activity;nucleotide binding;transporter activity	Pf00401, Pf02823	163.1	52.9	70.9	0.324341	0.434703	1.34026	192.07	1162.4
H9CCH7	Beta-keto-ACP reductase OS=Nicotiana tabacum GN=KAR PE=2 SV=1	18.4615	6	13	6	325	33.976	9.41				metabolic process		catalytic activity;nucleotide binding	Pf00106, Pf08659, Pf13561	166.1	45.7	46.3	0.275135	0.278748	1.01313	1.683	351.099
A0A0A1E5J9	CBL3 protein OS=Nicotiana sylvestris GN=CBL3 PE=2 SV=1	34.2342	6	10	6	222	25.332	5.11	104211231	LOC104211231				metal ion binding	Pf13202, Pf13499, Pf13833	167.7	36.5	49.4	0.217651	0.294574	1.35342	1.254	224.75
Q9SQI4	Centrin OS=Nicotiana tabacum GN=CEN2 PE=2 SV=1	44.0678	6	11	6	177	20.476	4.83						metal ion binding	Pf00036, Pf13405, Pf13499, Pf13833, Pf14658	63.8	148.7	101.6	2.33072	1.59248	0.683255	3.125	255.989
I0B7J8	Chloroplast PsbP4 OS=Nicotiana benthamiana GN=psbP4 PE=2 SV=1	28.7313	6	74	6	268	28.562	7.84				metabolic process		metal ion binding	Pf01789	172.9	63.5	63.9	0.367264	0.369578	1.0063	17.957	1758.8
Q2QFR3	Cysteine proteinase aleuran type OS=Nicotiana benthamiana PE=2 SV=1	18.3333	6	50	6	360	39.183	7.28				metabolic process		catalytic activity	Pf00112, Pf03051, Pf08246	34.3	169.8	122.3	4.95044	3.5656	0.720259	6.743	1015.92
S5ZIN5	Cysteine synthase OS=Nicotiana attenuata PE=2 SV=1	35.0769	7	47	6	325	34.217	5.83				metabolic process		catalytic activity	Pf00291	88.7	59.4	88.5	0.669673	0.997745	1.4899	12.111	1271.44
Q40589	Cytosolic ascorbate peroxidase OS=Nicotiana tabacum PE=2 SV=1	36	10	148	6	250	27.433	5.67				metabolic process;response to stimulus		antioxidant activity;catalytic activity	Pf00141	86.2	94.7	112.4	1.09861	1.30394	1.18691	26.826	2796.72
M0ZU44	Elongation factor Ts OS=Solanum tuberosum GN=PGSC0003DMG400003138 PE=3 SV=1	17.5238	21	69	6	1050	114.201	4.79	102602783	LOC102602783; PGSC0003DMG400003138	7	metabolic process;response to stimulus		protein binding;RNA binding	Pf00575, Pf00627, Pf00889, Pf03344	194	50.3	61.2	0.259278	0.315464	1.2167	2.981	1491.29
Q38HV4	Fructose-bisphosphate aldolase OS=Solanum tuberosum PE=2 SV=1	30.1676	9	28	6	358	38.412	8.28	102577842	LOC102577842		metabolic process		catalytic activity	Pf00274	91.7	111.7	92.7	1.2181	1.01091	0.829902	2.008	964.732
Q9ZP50	FtsH-like protein Pftf OS=Nicotiana tabacum GN=Pftf PE=2 SV=1	13.5642	6	19	6	693	74.336	6.35				metabolic process;response to stimulus	membrane	catalytic activity;metal ion binding;nucleotide binding	Pf00004, Pf01057, Pf01078, Pf01434, Pf01695, Pf05496, Pf06068, Pf06480, Pf07724, Pf07726, Pf07728, Pf13191, Pf13207, Pf13401, Pf13934	128.9	81.2	82.3	0.629946	0.638479	1.01355	1.113	539.182
Q40403	G protein beta-subunit-like protein OS=Nicotiana plumbaginifolia PE=2 SV=1	25.9146	7	29	6	328	35.984	7.37						protein binding	Pf00400	99	107.5	99.6	1.08586	1.00606	0.926512	2.899	773.631
A0A076FN11	Glucose-6-phosphate isomerase OS=Nicotiana tabacum GN=GPI PE=2 SV=1	24.8239	15	52	6	568	62.765	7.06				metabolic process		catalytic activity	Pf00342	52	123.8	143.1	2.38077	2.75192	1.1559	5.813	1208
G9MD87	Heat shock protein 90 OS=Nicotiana tabacum GN=NtHsp90er-2 PE=2 SV=1	9.72906	6	8	6	812	93.169	5				metabolic process;response to stimulus		nucleotide binding;protein binding	Pf00183, Pf02518, Pf13589	83.9	107.6	90.9	1.28248	1.08343	0.844796	0.334	143.595
K4B8G4	Histidinol dehydrogenase, chloroplastic OS=Solanum lycopersicum GN=Solyc02g071890.2 PE=3 SV=1	17.5799	6	20	6	438	47.471	5.71	101243855	LOC101243855; Solyc02g071890.2	2	development;metabolic process;response to stimulus		catalytic activity;metal ion binding;nucleotide binding	Pf00815	90.1	117.9	104.1	1.30855	1.15538	0.882952	2.3	442.268
B6ZLB8	Indole-3-acetamide hydrolase OS=Nicotiana tabacum GN=NtAMI1 PE=2 SV=1	24	6	24	6	425	45.024	5.94				metabolic process		catalytic activity	Pf01425	106.2	113.2	103.5	1.06591	0.974576	0.914311	2.899	724.47
A0A075F1V0	Malate dehydrogenase OS=Nicotiana tabacum GN=mMDH PE=2 SV=1	40.4692	14	278	6	341	35.679	8.37				metabolic process		catalytic activity	Pf00056, Pf01073, Pf02056, Pf02866, Pf11582	75.3	116.8	115.8	1.55113	1.53785	0.991438	111.202	7536.42
Q006P9	Malic enzyme OS=Nicotiana tabacum PE=2 SV=2	15.4206	7	14	6	642	70.476	6.57				metabolic process		catalytic activity;metal ion binding;nucleotide binding	Pf00390, Pf03949	104	107.2	96.2	1.03077	0.925	0.897388	0.624	253.223
Q1W1W5	Nascent polypeptide-associated complex subunit beta OS=Nicotiana benthamiana PE=2 SV=1	71.875	6	19	6	160	17.334	6.81				metabolic process;regulation of biological process			Pf01849	151	60	61.4	0.397351	0.406623	1.02333	15.681	486.144
A0A068JKR2	Pathogenesis-related protein PR-10 OS=Nicotiana benthamiana GN=PR-10 PE=2 SV=1	39.375	7	19	6	160	17.803	5.58				defense response;response to stimulus			Pf00407	31.4	91.1	173.9	2.90127	5.53822	1.90889	10.938	457.621
M1BIS5	Pectinesterase OS=Solanum tuberosum GN=PGSC0003DMG402017934 PE=3 SV=1	11.7021	6	39	6	564	62.586	8.78		PGSC0003DMG402017934	6	cell organization and biogenesis;metabolic process;regulation of biological process		catalytic activity;enzyme regulator activity	Pf01095, Pf04043	111.7	130.7	94.6	1.1701	0.846911	0.723795	1.738	1016.5
O24141	Plastid-lipid-Associated Protein (Fragment) OS=Nicotiana tabacum GN=pap PE=4 SV=1	21.8519	6	63	6	270	29.385	4.88						structural molecule activity	Pf04755	82.8	118.5	103.3	1.43116	1.24758	0.87173	4.817	1638.91
O24030	Proteasome subunit alpha type-7 OS=Solanum lycopersicum GN=PAD1 PE=2 SV=1	25.4826	6	44	6	259	28.463	8.35	544128	PAD1	1	metabolic process	cytoplasm;cytosol;membrane;nucleus;proteasome;ribosome;vacuole	catalytic activity	Pf00227, Pf10584	72.3	117.6	115.3	1.62656	1.59474	0.980442	4.08	1202.37
C9DFB7	Protein disulfide isomerase (Fragment) OS=Nicotiana benthamiana GN=PDI PE=2 SV=1	42.1384	6	62	6	159	17.775	4.81				metabolic process		catalytic activity	Pf13848	40.1	156	117.4	3.89027	2.92768	0.752564	42.288	1298
M1AP43	Pyrroline-5-carboxylate reductase OS=Solanum tuberosum GN=PGSC0003DMG400010441 PE=3 SV=1	20.8029	6	12	6	274	28.294	8.56	102593772	LOC102593772; PGSC0003DMG400010441	2	metabolic process;response to stimulus		catalytic activity	Pf01210, Pf01408, Pf02153, Pf03446, Pf03807, Pf14748	64.3	154.4	129.3	2.40124	2.01089	0.837435	3.217	205.645
A0A076L2F1	Remorin 1 OS=Nicotiana tabacum PE=2 SV=1	26.8293	9	37	6	205	22.556	5.94							Pf03763	223.1	37	48.4	0.165845	0.216943	1.30811	6.743	743.77
A0A077D7P8	Ripening regulated protein DDTFR8 OS=Nicotiana tabacum PE=2 SV=1	34.7826	6	12	6	184	20.729	4.46							Pf04969	87.8	116.5	105.2	1.32688	1.19818	0.903004	9	241.921
Q9SSV1	RNase NGR3 OS=Nicotiana glutinosa GN=NGR3 PE=1 SV=1	25	6	19	6	236	27.031	5.22				metabolic process		catalytic activity;nucleotide binding;RNA binding	Pf00445	27.5	127.5	79.1	4.63636	2.87636	0.620392	4.412	344.746
K4BUB7	Serine hydroxymethyltransferase OS=Solanum lycopersicum GN=Solyc04g076790.2 PE=3 SV=1	24.7582	11	220	6	517	57.21	8.12	101264818	LOC101264818; Solyc04g076790.2	4	metabolic process		catalytic activity	Pf00155, Pf00464, Pf01212	76.4	110.9	123.1	1.45157	1.61126	1.11001	18.513	4663.09
H8XZ69	Sulfite oxidase OS=Nicotiana benthamiana GN=SO PE=2 SV=1	18.8295	6	14	6	393	43.305	7.06				metabolic process		catalytic activity;metal ion binding	Pf00174, Pf03404	102.7	106.5	91.3	1.037	0.888997	0.857277	1.154	408.042
A0A077D830	Superoxide dismutase copper chaperone isoform 1 OS=Nicotiana tabacum PE=2 SV=1	19.8083	6	14	6	313	33.1	7.36				metabolic process;regulation of biological process;transport		enzyme regulator activity;metal ion binding	Pf00080, Pf00403	57.3	98.1	129.4	1.71204	2.25829	1.31906	1.31	327.268
K4B170	Uncharacterized protein OS=Solanum lycopersicum GN=Solyc01g100360.2 PE=3 SV=1	21.5789	11	34	6	570	60.163	7.28	101245293	LOC101245293; Solyc01g100360.2	1	cellular homeostasis;metabolic process;regulation of biological process		catalytic activity;nucleotide binding	Pf00070, Pf02852, Pf07992, Pf13434	113	92.8	96.1	0.821239	0.850442	1.03556	2.275	1238.66
K4B7N3	Uncharacterized protein OS=Solanum lycopersicum GN=Solyc02g069010.2 PE=4 SV=1	17.0799	6	47	6	363	39.092	6.44	101254658	LOC101254658; Solyc02g069010.2	2	metabolic process	cytosol		Pf00459	106.3	110.2	105.5	1.03669	0.992474	0.95735	6.079	1421.85
K4B858	Uncharacterized protein OS=Solanum lycopersicum GN=Solyc02g070770.2 PE=4 SV=1	23.9726	6	17	6	292	31.723	8.34	101268541	LOC101268541; Solyc02g070770.2	2		membrane		Pf01073, Pf01370, Pf02719, Pf05368, Pf07993, Pf13460	142.6	60.5	66.6	0.424264	0.467041	1.10083	1.976	336.824
K4BE81	Uncharacterized protein OS=Solanum lycopersicum GN=Solyc03g006580.2 PE=4 SV=1	41.3223	6	8	6	242	27.442	4.79	101263084	LOC101263084; Solyc03g006580.2	3			protein binding	Pf08513, Pf10607	89.5	105.8	100	1.18212	1.11732	0.94518	1.929	220.235
K4BF53	Uncharacterized protein OS=Solanum lycopersicum GN=Solyc03g025800.2 PE=4 SV=1	44.5312	6	22	6	128	14.302	10.13		Solyc03g025800.2	3	transport		metal ion binding	Pf00403	91.5	96.3	106.1	1.05246	1.15956	1.10177	45.416	698.707
K4BMF0	Uncharacterized protein OS=Solanum lycopersicum GN=Solyc03g120010.2 PE=4 SV=1	24.7191	6	13	6	356	38.568	5.73	101253366	LOC101253366; Solyc03g120010.2	3			protein binding	Pf00400	88.2	111.3	100.1	1.2619	1.13492	0.899371	1.565	334.662
K4BVV8	Uncharacterized protein OS=Solanum lycopersicum GN=Solyc04g082310.2 PE=4 SV=1	22.63	6	27	6	327	36.914	5.9	101256088	LOC101256088; Solyc04g082310.2	4				Pf05542	118.3	88.2	101.1	0.745562	0.854607	1.14626	4.456	759.408
K4C1Z0	Uncharacterized protein OS=Solanum lycopersicum GN=Solyc05g053100.2 PE=3 SV=1	22.0665	11	49	6	571	61.245	7.06	101246429	LOC101246429; Solyc05g053100.2	5	cellular homeostasis;metabolic process;regulation of biological process;response to stimulus		catalytic activity;nucleotide binding	Pf00070, Pf02852, Pf07992, Pf13434	120.2	96	93.6	0.798669	0.778702	0.975	3.101	1508.97
K4C234	Uncharacterized protein OS=Solanum lycopersicum GN=Solyc05g053540.2 PE=3 SV=1	14.8936	6	35	6	611	65.502	6.54	101246533	LOC101246533; Solyc05g053540.2	5	development;metabolic process		catalytic activity;metal ion binding	Pf00920	118.9	99.6	96.3	0.837679	0.809924	0.966867	1.955	1171.44
K4C2V1	Uncharacterized protein OS=Solanum lycopersicum GN=Solyc05g056270.2 PE=4 SV=1	12.6733	6	13	6	505	54.614	6.95	101247324	LOC101247324; Solyc05g056270.2	5	metabolic process		catalytic activity	Pf00463, Pf01188, Pf09587, Pf13714	111.2	99.8	95.1	0.897482	0.855216	0.952906	0.911	315.477
K4C8L9	Uncharacterized protein OS=Solanum lycopersicum GN=Solyc06g071470.2 PE=4 SV=1	13.2827	6	12	6	527	56.819	5.97	101253196	LOC101253196; Solyc06g071470.2	6		membrane	protein binding	Pf04695	122.2	87.1	69.2	0.712766	0.566285	0.794489	1.219	340.7
K4CWX0	Uncharacterized protein OS=Solanum lycopersicum GN=Solyc09g097980.2 PE=4 SV=1	17.094	6	9	6	351	38.55	6.68	101266267	LOC101266267; Solyc09g097980.2	9				Pf00248	79.8	103.9	78.1	1.30201	0.978697	0.751684	0.931	166.213
K4CX44	Uncharacterized protein OS=Solanum lycopersicum GN=Solyc10g005110.2 PE=4 SV=1	12.5313	8	20	6	399	44.788	6.32	101260673	LOC101260673; Solyc10g005110.2	10	metabolic process	extracellular	catalytic activity	Pf01218	100.3	128.3	91.6	1.27916	0.91326	0.713952	1.649	216.13
K4CXI0	Uncharacterized protein OS=Solanum lycopersicum GN=Solyc10g006490.2 PE=4 SV=1	29.5699	6	11	6	186	20.851	4.49	101243746	LOC101243746; Solyc10g006490.2	10	transport			Pf04051	103.2	91.5	78.3	0.886628	0.758721	0.855738	3.329	222.9
M0ZN11	Uncharacterized protein OS=Solanum tuberosum GN=PGSC0003DMG400001661 PE=4 SV=1	14.2395	6	36	6	309	34.74	6.46	102596820	LOC102596820; PGSC0003DMG400001661	1	metabolic process;response to stimulus	cytosol	catalytic activity	Pf00248	76.9	123.8	116.9	1.60988	1.52016	0.944265	6.743	342.865
M0ZND0	Uncharacterized protein OS=Solanum tuberosum GN=PGSC0003DMG400001748 PE=3 SV=1	33.0827	6	32	6	266	29.351	9.91	102591299	LOC102591299; PGSC0003DMG400001748	9	metabolic process	membrane;ribosome	structural molecule activity	Pf00281, Pf00673	163.5	61.2	89	0.374312	0.544343	1.45425	7.799	950.285
M0ZQN1	Uncharacterized protein OS=Solanum tuberosum GN=PGSC0003DMG400002324 PE=4 SV=1	18.0662	6	62	6	393	42.834	7.06		PGSC0003DMG400002324	2	cell organization and biogenesis;response to stimulus			Pf14870	125.6	91.8	75.1	0.730892	0.59793	0.818083	3.365	1215.64
M1A1C5	Uncharacterized protein OS=Solanum tuberosum GN=PGSC0003DMG400004886 PE=4 SV=1	13.2184	6	9	6	522	57.733	8.18	102591826	LOC102591826; PGSC0003DMG400004886	6	metabolic process			Pf00291	88.6	91.1	83	1.02822	0.936795	0.911087	0.778	186.936
M1B818	Uncharacterized protein OS=Solanum tuberosum GN=PGSC0003DMG400015189 PE=3 SV=1	17.1843	6	8	6	483	52.774	6.86	102588156	LOC102588156; PGSC0003DMG400015189	3	metabolic process;response to stimulus	cytosol;membrane;vacuole	catalytic activity;metal ion binding	Pf02127, Pf05343	95	100.7	104.3	1.06	1.09789	1.03575	0.562	153.595
M1BBJ6	Uncharacterized protein OS=Solanum tuberosum GN=PGSC0003DMG400016115 PE=3 SV=1	11.0803	7	37	6	361	38.794	6.84	102595669	LOC102595669; PGSC0003DMG400016115	11	metabolic process		catalytic activity;metal ion binding	Pf00107, Pf08240	26.4	148	104.5	5.60606	3.95833	0.706081	10.365	1250.1
M1BCC6	Uncharacterized protein OS=Solanum tuberosum GN=PGSC0003DMG400016293 PE=4 SV=1	13.5	6	23	6	400	45.385	7.96	102595552	LOC102595552; PGSC0003DMG400016293	6	metabolic process		catalytic activity	Pf00248	87.6	135.4	110.1	1.54566	1.25685	0.813146	1.462	477.33
M1BQ50	Uncharacterized protein OS=Solanum tuberosum GN=PGSC0003DMG400019563 PE=3 SV=1	24.6862	6	15	6	239	26.792	9.5	102599656	LOC102599656; PGSC0003DMG400019563	7	metabolic process;response to stimulus	cytosol;membrane;ribosome;vacuole	RNA binding;structural molecule activity	Pf00189, Pf07650	99.8	118.1	104.4	1.18337	1.04609	0.883997	1.637	231.083
M1C107	Uncharacterized protein OS=Solanum tuberosum GN=PGSC0003DMG400022297 PE=4 SV=1	35.1931	6	17	6	233	25.89	8.25	102597197	LOC102597197; PGSC0003DMG400022297	7	transport	membrane	protein binding	Pf05739, Pf09177	81.8	125.6	103.7	1.53545	1.26773	0.825637	2.875	458.651
M1D2T1	Uncharacterized protein OS=Solanum tuberosum GN=PGSC0003DMG400031141 PE=3 SV=1	28.9683	6	13	6	252	28.823	8.88		PGSC0003DMG400031141	4	regulation of biological process;response to stimulus;transport	Golgi;membrane	nucleotide binding	Pf00025, Pf00071, Pf01926, Pf04670, Pf08477, Pf13191	124.2	59.9	60.9	0.482287	0.490338	1.01669	1.31	463.9
M1BI72	Uncharacterized protein OS=Solanum tuberosum GN=PGSC0003DMG401017754 PE=4 SV=1	23.8095	6	29	6	189	20.94	4.28		PGSC0003DMG401017754	12	response to stimulus;transport	membrane;mitochondrion	catalytic activity;metal ion binding;transporter activity	Pf02297	61.8	139.1	102.6	2.25081	1.66019	0.737599	9	570.27
P93394	Uracil phosphoribosyltransferase OS=Nicotiana tabacum GN=UPP PE=2 SV=1	29.4643	6	40	6	224	24.18	7.03				metabolic process		catalytic activity;nucleotide binding	Pf00156, Pf14681	103.3	109.4	106.9	1.05905	1.03485	0.977148	3.642	808.137
Q8GUA3	Vacuolar invertase OS=Nicotiana tabacum GN=vi PE=2 SV=2	11.6641	6	31	6	643	71.2	5.77				metabolic process		catalytic activity	Pf00251, Pf08244, Pf11837	77.7	151.6	92.8	1.95109	1.19434	0.612137	1.106	694.148
V9TLJ9	12-oxophytodienoate reductase 1 OS=Nicotiana tabacum GN=OPR1 PE=2 SV=1	23.0769	6	35	5	377	41.9	6.54				metabolic process		catalytic activity;nucleotide binding	Pf00724	39.9	151.5	114.2	3.79699	2.86216	0.753795	1.61	880.154
Q75ZE0	14-3-3 e-1 protein OS=Nicotiana tabacum GN=14-3-3 e-1 PE=2 SV=1	38.4615	10	53	5	260	29.365	4.78						protein binding	Pf00244	81.3	97.2	87.9	1.19557	1.08118	0.904321	6.079	1210.97
Q75ZD4	14-3-3 i-1 protein OS=Nicotiana tabacum GN=14-3-3 i-1 PE=2 SV=1	34.6154	9	58	5	260	29.368	4.86						protein binding;structural molecule activity	Pf00244, Pf00901	97.6	89.5	96	0.917008	0.983607	1.07263	7.913	1240.9
H2A0J7	2-carboxy-D-arabinitol 1-phosphate (CA1P) phosphatase OS=Nicotiana tabacum GN=c1pp PE=2 SV=1	11.811	5	10	5	508	55.812	6.29				metabolic process		catalytic activity	Pf00300	111.8	106.1	98.2	0.949016	0.878354	0.925542	0.585	249.16
R9W4N2	2-Cys peroxiredoxin (Fragment) OS=Nicotiana benthamiana PE=2 SV=1	48.9177	10	196	5	231	25.486	8.38				metabolic process		antioxidant activity;catalytic activity	Pf00578, Pf08534, Pf13905	97.7	107.8	109.6	1.10338	1.1218	1.0167	84.77	4248.21
Q36570	30S ribosomal protein S19, chloroplastic OS=Nicotiana bigelovii GN=rps19 PE=3 SV=5	60.8696	5	15	5	92	10.415	10.59				metabolic process	ribosome	RNA binding;structural molecule activity	Pf00203	138.2	51.8	100.4	0.374819	0.726483	1.93822	62.096	230.867
K4CAS8	40S ribosomal protein S24 OS=Solanum lycopersicum GN=Solyc06g084230.2 PE=3 SV=1	33.8346	5	22	5	133	15.41	10.62	101253000	LOC101253000; Solyc06g084230.2	6	metabolic process	ribosome	nucleotide binding;structural molecule activity	Pf01231, Pf01282	90.1	115.2	114.6	1.27858	1.27192	0.994792	62.096	389.981
M9TLL1	50S ribosomal protein L14, chloroplastic OS=Solanum carolinense GN=rpl14 PE=3 SV=1	36.0656	5	47	5	122	13.555	8.51				metabolic process	ribosome	RNA binding;structural molecule activity	Pf00238	120.7	96.7	103.7	0.80116	0.859155	1.07239	30.623	1353.72
Q8W2N5	9-divinyl ether synthase OS=Nicotiana tabacum GN=DES1 PE=1 SV=1	10.251	5	9	5	478	54.045	8.46				metabolic process	cytoplasm;cytosol	catalytic activity;metal ion binding	Pf00067	44	94.6	79.1	2.15	1.79773	0.836152	0.719	229.164
M1APJ5	Acyl-coenzyme A oxidase OS=Solanum tuberosum GN=PGSC0003DMG400010548 PE=3 SV=1	7.7037	5	19	5	675	75.851	7.8		PGSC0003DMG400010548	10	metabolic process		catalytic activity;nucleotide binding	Pf00441, Pf01756, Pf02770, Pf14749	63.6	126.3	114.2	1.98585	1.7956	0.904196	0.585	579.439
Q5DKU8	Adenosine kinase isoform 2S OS=Nicotiana tabacum PE=2 SV=1	19.4118	7	44	5	340	37.53	5.27				metabolic process		catalytic activity	Pf00294	77.3	95.5	96.1	1.23545	1.24321	1.00628	4.623	1400.35
P93344	Aldehyde dehydrogenase (NAD+) OS=Nicotiana tabacum GN=Aldh 2A PE=2 SV=1	19.9262	11	34	5	542	59.298	7.33				metabolic process		catalytic activity	Pf00171	45.1	128.1	47.1	2.84035	1.04435	0.367681	2.06	830.137
M0ZK11	Aminoacylase-1 OS=Solanum tuberosum GN=PGSC0003DMG400000909 PE=3 SV=1	10.8108	5	20	5	444	50.05	5.99	102590216	LOC102590216; PGSC0003DMG400000909	11	metabolic process	cytoplasm;endoplasmic reticulum	catalytic activity;metal ion binding	Pf01546, Pf07687	72	126	114.5	1.75	1.59028	0.90873	1.276	362.83
P32980	ATP synthase delta chain, chloroplastic OS=Nicotiana tabacum GN=ATPD PE=2 SV=1	18.1452	5	21	5	248	26.768	8.98				metabolic process;transport	membrane	catalytic activity;transporter activity	Pf00213	179.2	37.5	44.5	0.209263	0.248326	1.18667	2.162	635.787
K4BCZ5	Branched-chain-amino-acid aminotransferase OS=Solanum lycopersicum GN=Solyc02g091970.2 PE=3 SV=1	21.7507	5	11	5	377	40.875	5.58		Solyc02g091970.2	2	metabolic process		catalytic activity	Pf01063	128.5	104.2	89.7	0.810895	0.698054	0.860845	0.874	270.34
Q40480	C-7 protein OS=Nicotiana tabacum GN=C-7 PE=2 SV=1	17.8082	5	26	5	219	25.412	5.55						protein binding	Pf00043, Pf02798, Pf13409, Pf13410, Pf13417, Pf14497	70.4	94.4	88.7	1.34091	1.25994	0.939619	3.437	457.457
A0A077DBL4	Calnexin-like protein OS=Nicotiana tabacum PE=2 SV=1	13.1725	9	54	5	539	61.279	4.87				metabolic process	endoplasmic reticulum;membrane	metal ion binding;protein binding	Pf00262	60.1	118.7	102.6	1.97504	1.70715	0.864364	2.652	972.421
A4D0J8	Carbonic anhydrase (Fragment) OS=Nicotiana benthamiana PE=2 SV=1	43.2432	6	34	5	185	20.513	7.33				metabolic process		catalytic activity;metal ion binding	Pf00484	165.6	93.3	84.8	0.563406	0.512077	0.908896	16.013	888.629
A0A077DCK9	Carbonic anhydrase OS=Nicotiana tabacum PE=2 SV=1	24.7312	6	13	5	279	30.594	7.02				metabolic process		catalytic activity;metal ion binding	Pf00484	104.9	82	73.3	0.781697	0.698761	0.893902	2.36	272.092
I0B7J3	Chloroplast PsbO3 OS=Nicotiana benthamiana GN=psbO3 PE=2 SV=1	48.6486	16	261	5	333	35.414	5.49				metabolic process;regulation of biological process	membrane	metal ion binding	Pf01716	126.5	98.3	99.6	0.777075	0.787352	1.01322	120.153	4596.58
M0ZG73	Cysteine synthase OS=Solanum tuberosum GN=PGSC0003DMG400000048 PE=3 SV=1	19.0202	6	20	5	347	37.7	8.41		PGSC0003DMG400000048	1	metabolic process	mitochondrion	catalytic activity	Pf00291	142	48.5	64.5	0.341549	0.454225	1.3299	4.995	315.543
A2ICR9	Dehydroascorbate reductase OS=Solanum tuberosum GN=DHAR2 PE=2 SV=1	16.791	5	31	5	268	29.97	6.95	102577766	DHAR2		metabolic process		protein binding	Pf02798, Pf13409, Pf13410, Pf13417	84.7	126.7	109.2	1.49587	1.28926	0.861878	1.994	653.863
A0A076FNJ9	Delta-aminolevulinic acid dehydratase OS=Nicotiana tabacum PE=2 SV=1	15.814	5	52	5	430	46.81	7.36				metabolic process		catalytic activity;metal ion binding	Pf00490	138.5	61.9	108.1	0.446931	0.780505	1.74637	2.455	1469.07
Q6QJL7	Dihydrolipoyl dehydrogenase OS=Capsicum annuum GN=LDH PE=2 SV=1	31.2127	18	162	5	503	53.312	7.18				cellular homeostasis;metabolic process;regulation of biological process	cytoplasm	catalytic activity;nucleotide binding	Pf00070, Pf02852, Pf07992, Pf12831	127	92.7	103.5	0.729921	0.814961	1.1165	9.746	3383.93
U3PWQ0	EF2 protein OS=Nicotiana tabacum PE=2 SV=1	16.5289	5	9	5	242	27.392	6.18								33.6	146.3	116.6	4.35417	3.47024	0.796992	2.162	218.783
K7WU45	Fructokinase 3 OS=Solanum tuberosum GN=PGSC0003DMG400030653 PE=2 SV=1	19.2802	6	19	5	389	41.756	5.53	102593836	LOC102593836; PGSC0003DMG400030653	2	metabolic process		catalytic activity	Pf00294	116.1	84.8	97	0.730405	0.835487	1.14387	1.512	474.788
Q9SXX4	Fructose-bisphosphate aldolase OS=Nicotiana paniculata GN=NpAldP1 PE=2 SV=1	41.2658	15	190	5	395	42.547	7.33				metabolic process		catalytic activity	Pf00274	118.5	69.9	77.1	0.589873	0.650633	1.103	99	5918.1
U3PJP9	GDP-mannose-3',5'-epimerase OS=Nicotiana tabacum GN=GME1 PE=2 SV=1	34.8404	15	67	5	376	42.532	6.47				metabolic process		catalytic activity	Pf01073, Pf01370	110	85.7	91.5	0.779091	0.831818	1.06768	16.783	1283.14
P80461	Glutathione reductase, chloroplastic (Fragment) OS=Nicotiana tabacum GN=GOR PE=1 SV=1	33.2136	15	75	5	557	59.998	8.29				cellular homeostasis;metabolic process;regulation of biological process	cytoplasm	antioxidant activity;catalytic activity;nucleotide binding	Pf00070, Pf02852, Pf07992, Pf13434	96	98.1	116.6	1.02187	1.21458	1.18858	9	2078.77
A0A076KXA6	Glycerate dehydrogenase HPR, peroxisomal OS=Nicotiana tabacum PE=2 SV=1	16.188	8	57	5	383	41.794	6.8				metabolic process		catalytic activity;nucleotide binding	Pf00389, Pf02826	84.8	130.8	111.5	1.54245	1.31486	0.852446	3.262	1335.76
Q6L5N5	Heat shock protein 70 (Fragment) OS=Nicotiana benthamiana GN=Hsp70 PE=2 SV=1	27.0042	6	22	5	237	26.565	5.01				response to stimulus			Pf00012	37.2	154.3	122.4	4.14785	3.29032	0.79326	4.817	308.622
Q6Q8A5	Hexokinase-2, chloroplastic OS=Nicotiana tabacum GN=HXK2 PE=2 SV=1	12.6253	5	11	5	499	53.963	5.6				cellular homeostasis;metabolic process		catalytic activity;nucleotide binding	Pf00349, Pf03727	89.4	105.2	110.6	1.17673	1.23714	1.05133	0.565	244.576
Q9LW96	Inositol-3-phosphate synthase OS=Nicotiana tabacum PE=2 SV=1	19.8039	10	21	5	510	56.334	5.77				metabolic process	cytoplasm	catalytic activity	Pf01658, Pf07994	39.7	200.9	122.7	5.06045	3.09068	0.610752	2.728	285.89
K9M7R4	Jasmonoyl-L-isoleucine hydrolase 1 OS=Nicotiana attenuata PE=2 SV=1	15.6463	5	8	5	441	48.482	5.85				metabolic process		catalytic activity	Pf01546, Pf07687	85.5	117.4	90.7	1.3731	1.06082	0.772572	0.957	223.745
Q03685	Luminal-binding protein 5 OS=Nicotiana tabacum GN=BIP5 PE=2 SV=1	41.3174	26	212	5	668	73.699	5.19				cell organization and biogenesis	endoplasmic reticulum;organelle lumen	catalytic activity;nucleotide binding	Pf00012, Pf01968, Pf03321, Pf06723	40.9	162.2	116.3	3.96577	2.84352	0.717016	28.936	4086.49
O22436	Magnesium-chelatase subunit ChlI, chloroplastic OS=Nicotiana tabacum GN=CHLI PE=2 SV=1	15.9624	5	6	5	426	46.599	7.09				metabolic process		catalytic activity;nucleotide binding		183.5	66.1	66.4	0.360218	0.361853	1.00454	0.701	155.261
Q41444	Mitochondrial processing peptidase OS=Solanum tuberosum GN=MPP PE=2 SV=1	12.0755	5	11	5	530	59.235	6.64	102590566	MPP		metabolic process		catalytic activity;metal ion binding	Pf00675, Pf05193	88.3	74.5	84	0.843715	0.951302	1.12752	0.45	266.448
Q70Z18	Nucleosome assembly protein 1;2 OS=Nicotiana tabacum GN=NAP1;2 PE=1 SV=1	17.5066	5	15	5	377	43.128	4.46				cell organization and biogenesis	cytoplasm;nucleus		Pf00956	128.8	55.5	60.8	0.430901	0.47205	1.0955	1.783	360.049
K4CTF8	Peptidyl-prolyl cis-trans isomerase OS=Solanum lycopersicum GN=Solyc09g057670.2 PE=4 SV=1	40.9396	5	22	5	149	16.036	7.96	101264667	LOC101264667; Solyc09g057670.2	9	metabolic process	cytosol;Golgi;vacuole	catalytic activity	Pf00254	67.3	125.6	107.5	1.86627	1.59733	0.855892	5.31	689.433
Q50LG4	Peroxidase OS=Nicotiana tabacum GN=NtPOX2 PE=2 SV=1	17.5	6	25	5	360	38.505	6.54				metabolic process;response to stimulus		antioxidant activity;catalytic activity;metal ion binding	Pf00141	25	222.2	49.8	8.888	1.992	0.224122	1.637	449.788
Q94IQ1	Peroxidase OS=Nicotiana tabacum GN=PER9-6 PE=2 SV=1	14.4068	6	11	5	354	39.039	6.42				metabolic process;response to stimulus		antioxidant activity;catalytic activity;metal ion binding	Pf00141	103	103.2	111.1	1.00194	1.07864	1.07655	1.404	177.325
B6VRE8	Phenylcoumaran benzylic ether reductase OS=Nicotiana tabacum GN=TP7 PE=2 SV=1	12.987	5	10	5	308	33.984	6.33				metabolic process		catalytic activity	Pf01073, Pf01370, Pf02254, Pf03435, Pf05368, Pf07993, Pf08659, Pf13460	95.7	107.8	102.8	1.12644	1.07419	0.953618	1.015	194.42
A9YTW3	Pheophorbide A oxygenase 1 OS=Nicotiana tabacum PE=2 SV=1	10.7345	5	8	5	531	60.449	7.65				metabolic process		catalytic activity;metal ion binding	Pf00355, Pf08417	128.4	52.9	53.9	0.411994	0.419782	1.0189	0.52	166.925
Q84UU0	Photosystem I subunit XI OS=Nicotiana attenuata PE=2 SV=1	25	5	14	5	220	23.256	9.58				metabolic process			Pf02605	211.5	32.2	41.4	0.152246	0.195745	1.28571	2.455	281.353
P30360	Probable cinnamyl alcohol dehydrogenase 2 OS=Nicotiana tabacum GN=CAD19 PE=1 SV=1	17.6471	6	13	5	357	38.735	5.97				metabolic process		catalytic activity;metal ion binding	Pf00107, Pf08240	82.6	74.3	81.6	0.899516	0.987893	1.09825	1.462	325.747
Q40473	PS60 protein OS=Nicotiana tabacum GN=PS60 PE=4 SV=1	8.51852	5	9	5	540	60.107	9.11				metabolic process		catalytic activity;metal ion binding	Pf00394, Pf07731, Pf07732	94.7	141.9	95.5	1.49842	1.00845	0.673009	0.638	196.993
Q01111	Ras-related protein YPT3 OS=Nicotiana plumbaginifolia GN=YPT3 PE=2 SV=1	40.367	9	22	5	218	24.168	5.72				regulation of biological process;response to stimulus;transport	membrane	nucleotide binding	Pf00025, Pf00071, Pf04670, Pf08477	106.3	88.1	79.2	0.828786	0.745061	0.898978	4.817	605.766
A9XG40	Subtilisin-like protease OS=Nicotiana tabacum GN=SBT1.1A PE=2 SV=1	6.90104	5	10	5	768	81.137	7.01				metabolic process;regulation of biological process		catalytic activity;protein binding	Pf00082, Pf02225, Pf05922	99.5	107.7	114.2	1.08241	1.14774	1.06035	0.496	251.21
K4DH85	Ubiquitin-fold modifier 1 OS=Solanum lycopersicum GN=Solyc12g096120.1 PE=3 SV=1	58.5859	5	27	5	99	10.396	9.52	101263096	LOC101263096; Solyc12g096120.1	12				Pf03671	86.8	102.1	107	1.17627	1.23272	1.04799	18.307	376.26
Q6IVK5	UDP-glucuronate decarboxylase 1 OS=Nicotiana tabacum PE=2 SV=1	17.7843	5	7	5	343	38.704	7.55				metabolic process		catalytic activity	Pf01073, Pf01370, Pf02719, Pf04321, Pf07993	71.1	109.4	102.1	1.53868	1.43601	0.933272	0.957	184.441
W8S2M6	UDP-sulfoquinovose synthase OS=Nicotiana tabacum PE=2 SV=1	14.1372	5	28	5	481	53.406	8.19				metabolic process		catalytic activity	Pf01073, Pf01266, Pf01370, Pf02719	126.3	84.3	100.2	0.667458	0.793349	1.18861	1.154	718.309
K4ASW3	Uncharacterized protein OS=Solanum lycopersicum GN=rpl2 PE=3 SV=1	19.6023	5	54	5	352	38.975	11.02		Solyc01g007630.2	1	metabolic process	ribosome	catalytic activity;nucleotide binding;RNA binding;structural molecule activity	Pf00181, Pf00276, Pf03947	106.1	100.2	99.5	0.944392	0.937795	0.993014	2.162	1313.42
K4ASB8	Uncharacterized protein OS=Solanum lycopersicum GN=Solyc01g005520.2 PE=4 SV=1	10.9091	5	16	5	330	37.099	7.64	101254513	LOC101254513; Solyc01g005520.2	1	response to stimulus	membrane	protein binding	Pf13424, Pf13432	177.9	43.4	52.3	0.243957	0.293985	1.20507	2.008	192.276
K4ASM9	Uncharacterized protein OS=Solanum lycopersicum GN=Solyc01g006630.2 PE=4 SV=1	11.6992	5	11	5	359	39.352	7.27	101248809	LOC101248809; Solyc01g006630.2	1	metabolic process	cytosol	catalytic activity	Pf01408	86.1	116.5	102	1.35308	1.18467	0.875536	0.823	265.871
K4ATQ2	Uncharacterized protein OS=Solanum lycopersicum GN=Solyc01g010580.2 PE=3 SV=1	19.2893	5	14	5	197	22.99	10.24	101257063; 101253011; 101253922	LOC101257063; LOC101253011; LOC101253922; Solyc04g005680.2; Solyc01g010540.2; Solyc01g010580.2	4; 1	metabolic process	cytosol;membrane;ribosome	RNA binding;structural molecule activity	Pf00163, Pf01479	82.3	128.5	112.6	1.56136	1.36817	0.876265	2.455	118.125
K4AXM7	Uncharacterized protein OS=Solanum lycopersicum GN=Solyc01g079820.2 PE=4 SV=1	26.3158	5	39	5	190	20.56	8.37	101251323	LOC101251323; Solyc01g079820.2	1	metabolic process;response to stimulus		catalytic activity	Pf00578, Pf08534	82	123.8	113.5	1.50976	1.38415	0.916801	3.642	858.009
K4B9Y6	Uncharacterized protein OS=Solanum lycopersicum GN=Solyc02g081160.2 PE=3 SV=1	7.73286	5	10	5	569	61.727	6.43	101243849	LOC101243849; Solyc02g081160.2	2	metabolic process	cytoplasm	catalytic activity;metal ion binding;nucleotide binding	Pf00365	93.5	87.4	93.4	0.934759	0.99893	1.06865	0.63	199.601
K4BAY6	Uncharacterized protein OS=Solanum lycopersicum GN=Solyc02g084710.2 PE=4 SV=1	37.2881	6	18	5	118	13.008	6.92	101245904	LOC101245904; Solyc02g084710.2	2	cellular homeostasis;metabolic process;regulation of biological process	extracellular	catalytic activity;enzyme regulator activity	Pf00085, Pf08534, Pf13098, Pf13899, Pf13905	74.2	83	108.7	1.1186	1.46496	1.30964	9	323.126
K4BDZ7	Uncharacterized protein OS=Solanum lycopersicum GN=Solyc03g005730.2 PE=4 SV=1	12.3772	6	22	5	509	55.241	7.3	101266391	LOC101266391; Solyc03g005730.2	3	metabolic process		catalytic activity	Pf00330	100.5	82.5	100.2	0.820896	0.997015	1.21455	0.995	468.743
K4BFN4	Uncharacterized protein OS=Solanum lycopersicum GN=Solyc03g033620.2 PE=4 SV=1	10.4822	5	11	5	477	53.484	6.92	101248271	LOC101248271; Solyc03g033620.2	3	metabolic process	membrane;vacuole	catalytic activity	Pf05577	71.6	132.1	106.3	1.84497	1.48464	0.804693	0.61	208.817
K4BK30	Uncharacterized protein OS=Solanum lycopersicum GN=Solyc03g111670.2 PE=4 SV=1	7.43551	5	10	5	659	71.547	8.22	101255081	LOC101255081; Solyc03g111670.2	3	metabolic process	membrane	catalytic activity;nucleotide binding;protein binding	Pf00069, Pf03283, Pf07714, Pf08263, Pf13855	128.3	81	86.8	0.631333	0.676539	1.0716	0.468	181.249
K4BN60	Uncharacterized protein OS=Solanum lycopersicum GN=Solyc03g123610.2 PE=4 SV=1	14.5215	8	47	5	606	66.301	8.24		Solyc03g123610.2	3	metabolic process		catalytic activity	Pf00155	89.2	94.6	102.6	1.06054	1.15022	1.08457	1.352	885.867
K4BNL9	Uncharacterized protein OS=Solanum lycopersicum GN=Solyc04g007120.2 PE=4 SV=1	14.4254	6	31	5	409	42.591	4.81	101249452	LOC101249452; Solyc04g007120.2	4	metabolic process;response to stimulus	nucleus	DNA binding;protein binding	Pf00240, Pf00627, Pf09280, Pf10302, Pf11976	77.3	116.1	112.8	1.50194	1.45925	0.971576	6.017	617.566
K4BQZ9	Uncharacterized protein OS=Solanum lycopersicum GN=Solyc04g025540.2 PE=4 SV=1	9.60549	5	11	5	583	64.107	7.28	101259530	LOC101259530; Solyc04g025540.2	4	metabolic process		catalytic activity	Pf00591, Pf02885	98.9	107.7	103.6	1.08898	1.04752	0.961931	0.604	193.01
K4BRG8	Uncharacterized protein OS=Solanum lycopersicum GN=Solyc04g045340.2 PE=3 SV=1	12.5214	6	15	5	583	63.412	6.55	101267885	LOC101267885; Solyc04g045340.2	4	development;metabolic process;response to stimulus	cytosol;extracellular;membrane;nucleus	catalytic activity;metal ion binding	Pf00408, Pf02878, Pf02879, Pf02880	110.3	89.3	87.9	0.80961	0.796917	0.984323	0.645	421.066
K4BUN4	Uncharacterized protein OS=Solanum lycopersicum GN=Solyc04g077970.2 PE=3 SV=1	20.6767	5	12	5	266	28.882	7.37	101260722	LOC101260722; Solyc04g077970.2	4	metabolic process	cytoplasm	catalytic activity	Pf00156	73.6	127.9	111.5	1.73777	1.51495	0.871775	1.955	140.7
K4C5A1	Uncharacterized protein OS=Solanum lycopersicum GN=Solyc06g048540.2 PE=3 SV=1	15.3846	5	5	5	312	33.996	7.03	101247531	LOC101247531; Solyc06g048540.2	6	cell organization and biogenesis;metabolic process;transport		catalytic activity;nucleotide binding;transporter activity	Pf00005, Pf13304, Pf13671	138.4	56.6	74.4	0.40896	0.537572	1.31449	0.778	97.3646
K4C8X8	Uncharacterized protein OS=Solanum lycopersicum GN=Solyc06g072580.2 PE=4 SV=1	14.7139	5	13	5	367	39.572	6.58	101266731	LOC101266731; Solyc06g072580.2	6	metabolic process		catalytic activity	Pf02779, Pf02780	75.9	92	97.5	1.21212	1.28458	1.05978	1.783	380.892
K4C947	Uncharacterized protein OS=Solanum lycopersicum GN=Solyc06g073280.2 PE=3 SV=1	14.7505	5	28	5	461	50.237	7.91	101252192	LOC101252192; Solyc06g073280.2	6	metabolic process;regulation of biological process;response to stimulus		catalytic activity;metal ion binding	Pf00155, Pf04864	106.5	112.9	108.5	1.06009	1.01878	0.961027	1.395	785.643
K4C9N4	Uncharacterized protein OS=Solanum lycopersicum GN=Solyc06g075180.1 PE=3 SV=1	33.1325	5	40	5	166	17.798	8.69	101262318	LOC101262318; Solyc06g075180.1	6	metabolic process	ribosome	structural molecule activity	Pf00298, Pf03946	109.3	77.6	105.2	0.709973	0.962489	1.35567	11.589	1032.3
K4CAN7	Uncharacterized protein OS=Solanum lycopersicum GN=Solyc06g083820.2 PE=4 SV=1	32.3308	7	30	5	133	15.279	10.35	101262929	LOC101262929; Solyc06g083820.2	6	metabolic process	ribosome	structural molecule activity	Pf01929	101.6	98.7	111.8	0.971457	1.10039	1.13273	20.544	716.153
K4CCK4	Uncharacterized protein OS=Solanum lycopersicum GN=Solyc07g017900.2 PE=4 SV=1	18.1529	5	8	5	314	35.387	6.71		Solyc07g017900.2	7	metabolic process	membrane	catalytic activity	Pf01263	92.1	97.6	110.8	1.05972	1.20304	1.13525	1.154	218.745
K4CIV5	Uncharacterized protein OS=Solanum lycopersicum GN=Solyc08g008210.2 PE=3 SV=1	19.917	5	8	5	241	27.588	7.09	543663	LOC543663; Solyc08g008210.2	8	transport		catalytic activity;transporter activity	Pf01991	126.4	52	52.5	0.411392	0.415348	1.00962	1.738	128.479
K4CL75	Uncharacterized protein OS=Solanum lycopersicum GN=Solyc08g062920.2 PE=4 SV=1	7.24638	7	11	5	828	92.323	6.16		Solyc08g062920.2	8	metabolic process;response to stimulus	cytosol;extracellular;membrane	catalytic activity;metal ion binding;nucleotide binding	Pf00009, Pf00679, Pf03144, Pf03764, Pf14492	115.9	47.4	45.5	0.408973	0.39258	0.959916	0.435	192.114
K4CLG9	Uncharacterized protein OS=Solanum lycopersicum GN=Solyc08g065900.2 PE=4 SV=1	16.6667	5	10	5	252	28.389	5.03		Solyc08g065900.2	8	transport	membrane		Pf03357	62.7	142.7	91.3	2.27592	1.45614	0.639804	1.512	199.754
K4CQB7	Uncharacterized protein OS=Solanum lycopersicum GN=Solyc09g007270.2 PE=3 SV=1	37.6	8	50	5	250	27.618	5.96	101258987	LOC101258987; Solyc09g007270.2	9	metabolic process;response to stimulus		antioxidant activity;catalytic activity	Pf00141	89.1	101.5	112	1.13917	1.25701	1.10345	5.31	957.283
K4CQE3	Uncharacterized protein OS=Solanum lycopersicum GN=Solyc09g007540.2 PE=3 SV=1	3.71747	5	5	5	1076	122.531	6.47	101250918	LOC101250918; Solyc09g007540.2	9	metabolic process;regulation of biological process	cytosol;mitochondrion	catalytic activity;nucleotide binding	Pf00133, Pf08264, Pf09334, Pf11172, Pf13603	130.3	69.5	69.7	0.533384	0.534919	1.00288	0.194	88.8825
K4CRS9	Uncharacterized protein OS=Solanum lycopersicum GN=Solyc09g014520.2 PE=4 SV=1	15.4386	5	13	5	285	31.123	6.14	101249002	LOC101249002; Solyc09g014520.2	9	metabolic process;response to stimulus	membrane	metal ion binding	Pf00504	191	35.2	35.2	0.184293	0.184293	1	1.738	211.582
K4CUR8	Uncharacterized protein OS=Solanum lycopersicum GN=Solyc09g066430.2 PE=4 SV=1	40.6015	7	42	5	133	15.36	10.43	101252219	LOC101252219; Solyc09g066430.2	9	metabolic process	cytosol;endoplasmic reticulum;membrane;ribosome;vacuole	structural molecule activity	Pf01929	92	112.6	113.7	1.22391	1.23587	1.00977	76.426	987.321
K4D2A4	Uncharacterized protein OS=Solanum lycopersicum GN=Solyc10g078620.1 PE=3 SV=1	20.4651	5	11	5	215	23.749	9.54	101248251	LOC101248251; Solyc10g078620.1	10	metabolic process	ribosome	RNA binding;structural molecule activity	Pf00177	105.5	99.7	104.4	0.945024	0.989573	1.04714	2.831	175.879
K4DC86	Uncharacterized protein OS=Solanum lycopersicum GN=Solyc12g009980.1 PE=4 SV=1	23.3696	5	32	5	184	19.988	8.15	101266487	LOC101266487; Solyc12g009980.1	12				Pf02575	146.3	59.9	66.1	0.409433	0.451811	1.10351	9	885.252
K4CZW8	Uncharacterized protein OS=Solanum lycopersicum GN=XYL1 PE=4 SV=1	10.9091	6	19	5	770	83.11	8.03		Solyc10g047030.1	10	metabolic process		catalytic activity	Pf00933, Pf01915, Pf14310	139.9	114.4	87.5	0.817727	0.625447	0.76486	0.901	361.69
M0ZP01	Uncharacterized protein OS=Solanum tuberosum GN=PGSC0003DMG400001912 PE=4 SV=1	12.8874	5	7	5	613	65.857	6.89	102592762	LOC102592762; PGSC0003DMG400001912	00	metabolic process		catalytic activity	Pf02878, Pf02879, Pf02880	95.5	107.5	110.7	1.12565	1.15916	1.02977	0.468	145.261
M0ZRG6	Uncharacterized protein OS=Solanum tuberosum GN=PGSC0003DMG400002537 PE=3 SV=1	20	13	60	5	605	64.273	5.66	102577751	LOC102577751; PGSC0003DMG400002537	3	cell death;defense response;metabolic process;response to stimulus	cytoplasm;extracellular;membrane;ribosome	nucleotide binding	Pf00118	123	78.7	99.4	0.639837	0.80813	1.26302	4.179	1449.54
M0ZWK1	Uncharacterized protein OS=Solanum tuberosum GN=PGSC0003DMG400003741 PE=3 SV=1	14.9733	7	21	5	374	41.004	6.9	102598576	LOC102598576; PGSC0003DMG400003741	4	metabolic process		catalytic activity	Pf00185, Pf02729	103.7	93.6	91.6	0.902604	0.883317	0.978632	2.34	438.12
M1A511	Uncharacterized protein OS=Solanum tuberosum GN=PGSC0003DMG400005805 PE=4 SV=1	23.6686	5	25	5	169	18.214	8.72	102603293	LOC102603293; PGSC0003DMG400005805	8	metabolic process	membrane	protein binding	Pf05479	185.9	27.5	37.2	0.147929	0.200108	1.35273	7.111	587.51
M1ASC5	Uncharacterized protein OS=Solanum tuberosum GN=PGSC0003DMG400011219 PE=4 SV=1	12.628	5	6	5	293	32.375	4.86		PGSC0003DMG400011219	7			protein binding	Pf00515, Pf07719, Pf12968, Pf13371, Pf13414, Pf13424	97.4	83.5	98	0.85729	1.00616	1.17365	0.931	117.507
M1AWJ2	Uncharacterized protein OS=Solanum tuberosum GN=PGSC0003DMG400012254 PE=3 SV=1	33.1334	22	199	5	667	73.418	5.16	102598457	LOC102598457; PGSC0003DMG400012254	8			nucleotide binding	Pf00012, Pf01968, Pf06723	38.2	156.6	123	4.09948	3.2199	0.785441	19.753	3992.73
Q3HRZ3	Uncharacterized protein OS=Solanum tuberosum GN=PGSC0003DMG400013035 PE=2 SV=1	41.5385	5	23	5	130	14.781	9.89	102597451; 102588930; 102597770; 102577793	LOC102597451; LOC102588930; LOC102597770; LOC102577793; PGSC0003DMG400025324; PGSC0003DMG400013035	4; 6	metabolic process	ribosome	structural molecule activity	Pf00410	90.8	105	109.1	1.15639	1.20154	1.03905	5.579	259.555
M1B932	Uncharacterized protein OS=Solanum tuberosum GN=PGSC0003DMG400015463 PE=3 SV=1	20.5805	7	31	5	379	41.716	7.37	102591304	LOC102591304; PGSC0003DMG400015463	12	metabolic process		catalytic activity	Pf00185, Pf02729	118.9	71.4	77.4	0.600505	0.650967	1.08403	1.721	847.04
M1BAU4	Uncharacterized protein OS=Solanum tuberosum GN=PGSC0003DMG400015881 PE=3 SV=1	4.83871	5	9	5	930	104.973	5.94	102596982	LOC102596982; PGSC0003DMG400015881	4	metabolic process;response to stimulus		catalytic activity	Pf01055	110.6	141.7	89.1	1.28119	0.805606	0.628793	0.292	253.717
M1CPX7	Uncharacterized protein OS=Solanum tuberosum GN=PGSC0003DMG400028115 PE=3 SV=1	12.7869	5	33	5	305	33.989	4.91		PGSC0003DMG400028115	10	metabolic process;regulation of biological process		enzyme regulator activity;nucleotide binding;protein binding	Pf01025	100.3	111.7	106.4	1.11366	1.06082	0.952551	1.783	541.007
M1CTG2	Uncharacterized protein OS=Solanum tuberosum GN=PGSC0003DMG400028869 PE=4 SV=1	6.15595	5	10	5	731	82.054	5.24		PGSC0003DMG400028869	1	metabolic process		catalytic activity	Pf00326, Pf02897	75.2	128	103.4	1.70213	1.375	0.807813	0.379	187.332
M1CV01	Uncharacterized protein OS=Solanum tuberosum GN=PGSC0003DMG400029301 PE=4 SV=1	9.32722	5	21	5	654	67.351	5.78	102595397	LOC102595397; PGSC0003DMG400029301	12		cytosol	RNA binding	Pf00013, Pf03153, Pf07650, Pf09770, Pf13014, Pf13083, Pf14967	106.6	129.4	66.5	1.21388	0.623827	0.51391	2.36	476.685
M1D2T7	Uncharacterized protein OS=Solanum tuberosum GN=PGSC0003DMG400031148 PE=4 SV=1	16.0665	6	22	5	361	39.596	6.02	102601087	LOC102601087; PGSC0003DMG400031148	4	metabolic process		catalytic activity	Pf01408	59.8	131.5	114.6	2.199	1.91639	0.871483	2.728	365.005
M1D3L2	Uncharacterized protein OS=Solanum tuberosum GN=PGSC0003DMG400031345 PE=3 SV=1	34.8684	5	29	5	152	17.512	10.62	102587187	LOC102587187; PGSC0003DMG400031345	3	metabolic process	cytosol;membrane;ribosome;vacuole	RNA binding;structural molecule activity	Pf00416	108.9	97.1	102.7	0.891644	0.943067	1.05767	24.119	886.971
M1AP60	Uncharacterized protein OS=Solanum tuberosum GN=PGSC0003DMG402010449 PE=4 SV=1	19.5876	5	12	5	194	21.566	8.73	102597067	LOC102597067; PGSC0003DMG402010449	2	cellular homeostasis;metabolic process;regulation of biological process		catalytic activity	Pf00085, Pf13098, Pf13728, Pf13899, Pf13905	117.2	82.2	80.7	0.701365	0.688567	0.981752	4.995	350.795
Q75ZD6	14-3-3 h-1 protein OS=Nicotiana tabacum GN=14-3-3 h-1 PE=2 SV=1	47.2868	11	82	4	258	29.007	4.78						protein binding	Pf00244	101.2	69.1	76.9	0.682806	0.759881	1.11288	19.691	2185
O49995	14-3-3-like protein B OS=Nicotiana tabacum PE=2 SV=1	39.2157	9	63	4	255	28.809	4.77						protein binding	Pf00244	108.6	71.7	92.4	0.660221	0.850829	1.2887	14.849	1714.14
B3F8G6	2-C-methyl-D-erythritol 4-phosphate cytidyltransferase OS=Nicotiana langsdorffii x Nicotiana sanderae PE=2 SV=1	26.4706	8	25	4	306	34.047	7.81				metabolic process		catalytic activity	Pf00483, Pf01128, Pf12804	78.1	136.8	124	1.7516	1.58771	0.906433	5.952	506.063
P19682	28 kDa ribonucleoprotein, chloroplastic OS=Nicotiana sylvestris PE=1 SV=1	24.2754	4	56	4	276	30.68	4.74	104242583	LOC104242583		metabolic process		nucleotide binding;RNA binding	Pf00076, Pf13893, Pf14259	138.5	84.7	101.6	0.611552	0.733574	1.19953	11.115	1800.72
A0A076L2E7	3-desoxy-D-manno octulosonic acid-8-phosphate synthase OS=Nicotiana tabacum PE=2 SV=1	16.2069	4	9	4	290	31.846	7.06				metabolic process	cytoplasm	catalytic activity	Pf00793	129.5	71.2	73.6	0.549807	0.56834	1.03371	1.371	248.839
A0A0C5B729	30S ribosomal protein S4, chloroplastic OS=Iochroma nitidum GN=rps4 PE=3 SV=1	22.3881	4	18	4	201	23.477	10.71	23631110	rps4		metabolic process	ribosome	RNA binding;structural molecule activity	Pf00163, Pf01479	189.5	39.4	81.8	0.207916	0.431662	2.07614	3.125	491.231
K4BNY4	4-hydroxy-4-methyl-2-oxoglutarate aldolase OS=Solanum lycopersicum GN=Solyc04g008280.2 PE=3 SV=1	21.9124	6	22	4	251	27.764	9.07		Solyc04g008280.2	4	regulation of biological process		catalytic activity;enzyme regulator activity;metal ion binding	Pf03737	121.1	78.6	98.2	0.64905	0.8109	1.24936	3.87	430.604
Q6L4B2	40S ribosomal protein S13, putative OS=Solanum demissum GN=SDM1_19t00016 PE=4 SV=2	20.6061	4	11	4	165	18.635	10.43				metabolic process	ribosome	structural molecule activity	Pf00312, Pf08069	88.5	96.5	98.7	1.0904	1.11525	1.0228	2.162	232.741
Q3HRZ6	40S ribosomal protein S8 OS=Solanum tuberosum PE=2 SV=1	15.1786	5	29	4	224	25.184	10.29	102577693	LOC102577693		metabolic process	ribosome	structural molecule activity	Pf01201	91.7	111.5	106.1	1.21592	1.15703	0.95157	3.125	1243.79
O80362	50S ribosomal protein L10, chloroplastic OS=Nicotiana tabacum GN=RPL10 PE=2 SV=1	14.0969	4	10	4	227	25.397	9.2					ribosome	RNA binding	Pf00466	163.6	58.3	59.2	0.356357	0.361858	1.01544	0.968	338.19
Q02764	50S ribosomal protein L24, chloroplastic OS=Nicotiana tabacum GN=RPL24 PE=1 SV=1	24.0642	6	40	4	187	20.689	9.79				metabolic process	ribosome	RNA binding;structural molecule activity	Pf00467	141.7	76.4	101.9	0.539167	0.719125	1.33377	20.544	660.192
P30956	50S ribosomal protein L28, chloroplastic OS=Nicotiana tabacum GN=RPL28 PE=1 SV=1	13.245	4	18	4	151	16.687	11.21				metabolic process	ribosome	structural molecule activity	Pf00830	133.8	73.3	98.4	0.547833	0.735426	1.34243	2.162	203.138
Q9XH13	6,7-dimethyl-8-ribityllumazine synthase (Fragment) OS=Nicotiana tabacum PE=2 SV=1	18.2222	4	13	4	225	24.105	7.72				metabolic process		catalytic activity	Pf00885	90.6	130	111	1.43488	1.22517	0.853846	2.831	379.143
Q07761	60S ribosomal protein L23a OS=Nicotiana tabacum GN=RPL23A PE=2 SV=1	17.5325	4	27	4	154	17.271	10.18				metabolic process	ribosome	nucleotide binding;RNA binding;structural molecule activity	Pf00276, Pf03939	99.7	102.7	121.4	1.03009	1.21765	1.18208	20.544	525.036
Q5DKU9	Adenosine kinase isoform 1S OS=Nicotiana tabacum PE=2 SV=1	16.1765	6	43	4	340	37.421	5.19				metabolic process		catalytic activity	Pf00294	83	96.3	98.3	1.16024	1.18434	1.02077	1.336	1392.46
A2PYH3	Alpha chain of nascent polypeptide associated complex OS=Nicotiana benthamiana GN=NbNACa1 PE=2 SV=1	60.6965	6	25	4	201	21.911	4.5						protein binding	Pf00627, Pf01849	141.9	49.2	56.1	0.346723	0.395349	1.14024	18.953	490.403
F2VJ74	Aspartic protease 1 OS=Nicotiana tabacum PE=2 SV=1	10.0791	4	11	4	506	55.261	6.2				metabolic process		catalytic activity	Pf00026, Pf03489, Pf05184, Pf14543	147.5	56.6	65.4	0.383729	0.44339	1.15548	0.957	314.562
P06290	ATP synthase subunit b, chloroplastic OS=Nicotiana tabacum GN=atpF PE=2 SV=3	22.8261	4	9	4	184	20.861	8.69				metabolic process;transport	membrane	catalytic activity;nucleotide binding;transporter activity	Pf00430	204.9	26.1	34.4	0.127379	0.167887	1.31801	1.683	217.499
U3MXK9	Auxin repressed protein 1 (Fragment) OS=Nicotiana benthamiana PE=2 SV=1	53.5714	4	6	4	112	11.959	9.09							Pf05564	94.4	130.4	82.6	1.38136	0.875	0.633436	5.31	157.647
A0A0C4FSU4	BADH2 protein OS=Nicotiana tabacum GN=BADH2 PE=2 SV=1	19.6429	7	10	4	504	55.624	5.53				metabolic process		catalytic activity	Pf00171	80.7	118.1	91.6	1.46344	1.13507	0.775614	1.291	234.17
E3UVW7	Beta-galactosidase OS=Solanum lycopersicum GN=TBG5 PE=2 SV=3	5.39906	4	13	4	852	93.154	7.18	543611	TBG5; Solyc11g069270.1	11	metabolic process		catalytic activity	Pf01301, Pf02140, Pf02449	117.5	123.8	91.9	1.05362	0.782128	0.742326	0.409	338.993
K4DBX2	Beta-galactosidase OS=Solanum lycopersicum GN=tEG3 PE=3 SV=1	7.45856	4	12	4	724	80.43	8.79		Solyc12g008840.1	12	metabolic process		catalytic activity	Pf01301, Pf02449	61.1	140.6	71.9	2.30115	1.17676	0.51138	0.482	383.963
M1BFJ8	Branched-chain-amino-acid aminotransferase OS=Solanum tuberosum GN=PGSC0003DMG400017100 PE=3 SV=1	13.6038	4	12	4	419	45.361	8.59	102577883	BCAT1; PGSC0003DMG400017100	3	metabolic process		catalytic activity	Pf01063	112.7	124.8	93.1	1.10736	0.826087	0.745994	0.65	341.82
K7ZLE1	Calcium-sensing receptor OS=Nicotiana benthamiana GN=NbCAS PE=2 SV=1	20.5584	6	32	4	394	41.843	9.39							Pf00581	87.7	136.7	98.9	1.55872	1.12771	0.723482	2.325	605.639
P27164	Calmodulin-related protein OS=Petunia hybrida GN=CAM53 PE=2 SV=2	44.5652	13	79	4	184	21.1	4.78						metal ion binding	Pf00036, Pf08726, Pf12763, Pf13202, Pf13405, Pf13499, Pf13833, Pf14658	81.7	115.1	104	1.40881	1.27295	0.903562	382.119	1447.26
P27141	Carbonic anhydrase, chloroplastic OS=Nicotiana tabacum PE=2 SV=1	22.7414	4	29	4	321	34.489	6.86				metabolic process		catalytic activity;metal ion binding	Pf00484	148.1	62.9	66.9	0.424713	0.451722	1.06359	3.467	672.235
Q9M4D2	Chloroplast ferredoxin-NADP+ oxidoreductase OS=Capsicum annuum GN=fnr PE=1 SV=1	30.9392	11	129	4	362	40.382	8.38				metabolic process		catalytic activity;nucleotide binding	Pf00175, Pf00667	129.4	94.1	98.5	0.727202	0.761206	1.04676	9	2072.63
A0A068JCD2	Chloroplast fructose-1,6-bisphosphatase OS=Nicotiana tabacum PE=2 SV=1	20.2439	7	45	4	410	44.537	5.4				metabolic process		catalytic activity	Pf00316	125.1	89	100.6	0.711431	0.804157	1.13034	4.456	1321.76
Q38JB4	Chloroplast lipocalin OS=Solanum tuberosum GN=CHL PE=2 SV=1	8.10811	4	11	4	333	37.505	6				response to stimulus	membrane		Pf00061, Pf08212	120.4	73.5	77.5	0.610465	0.643688	1.05442	1.154	180.18
A1Y9I8	Chloroplast post-illumination chlorophyll fluorescence increase protein OS=Nicotiana tabacum PE=2 SV=1	20.5776	4	21	4	277	29.935	5.47								129.9	87.5	97.1	0.673595	0.747498	1.10971	2.415	382.462
I0B7J9	Chloroplast PsbQ1 OS=Nicotiana benthamiana GN=psbQ1 PE=2 SV=1	21.0526	4	55	4	228	24.19	9.66				metabolic process		metal ion binding	Pf05757	157.2	61.1	56	0.388677	0.356234	0.91653	3.642	1859.84
A7XZB8	Chloroplast-localized protein OS=Nicotiana benthamiana GN=28C12 PE=2 SV=1	15.2542	4	9	4	295	33.731	8.6				cell organization and biogenesis;metabolic process			Pf11264	190.7	34.3	45.9	0.179864	0.240692	1.33819	1.069	181.281
A0A075F1U0	Constitutive plastid-lipid associated protein OS=Nicotiana tabacum GN=CHRD PE=2 SV=1	24.5989	4	34	4	187	19.858	8.57				metabolic process		catalytic activity	Pf01042	136.9	74.7	104.5	0.545654	0.763331	1.39893	2.415	952.205
T2BQ67	Cysteine protease CP15 OS=Nicotiana tabacum GN=CP15 PE=2 SV=1	9.2827	5	19	4	474	51.742	6.3				metabolic process		catalytic activity	Pf00112, Pf00396, Pf08246	64.8	106.5	100.5	1.64352	1.55093	0.943662	1.154	609.732
P51135	Cytochrome b-c1 complex subunit Rieske-5, mitochondrial OS=Nicotiana tabacum PE=2 SV=1	9.70149	4	8	4	268	29.244	8.68				metabolic process;transport	membrane;mitochondrion	catalytic activity;metal ion binding;transporter activity	Pf00355, Pf02921	109.7	90.1	73.2	0.821331	0.667274	0.812431	2.162	75.3497
P30361	Cytochrome b6-f complex iron-sulfur subunit 1, chloroplastic OS=Nicotiana tabacum GN=petC1 PE=2 SV=2	19.2982	4	83	4	228	24.136	7.68				metabolic process;transport	membrane	catalytic activity;metal ion binding;transporter activity	Pf00355, Pf08802	142.7	81	76.7	0.567624	0.537491	0.946914	5.105	2694.29
Q5XMB8	Cytosolic acetoacetyl-coenzyme A thiolase OS=Nicotiana tabacum GN=AACT1 PE=2 SV=1	15.5941	4	8	4	404	41.243	6.89				metabolic process		catalytic activity	Pf00108, Pf00109, Pf02803	62.1	73.1	86.4	1.17713	1.3913	1.18194	0.585	145.24
Q76MG1	Dehydrin (Fragment) OS=Nicotiana tabacum GN=NtERD10C PE=2 SV=1	14.9038	4	58	4	208	23.608	5.8				response to stimulus				62.8	105.5	105.6	1.67994	1.68153	1.00095	4.623	1652.77
Q84UH4	Dehydroascorbate reductase OS=Nicotiana tabacum GN=DHAR PE=2 SV=1	34.9057	7	26	4	212	23.646	7.88						protein binding	Pf02798, Pf13409, Pf13410, Pf13417	91.3	103.1	106.2	1.12924	1.1632	1.03007	6.197	643.695
K4DHT1	Dihydrolipoyl dehydrogenase OS=Solanum lycopersicum GN=Solyc12g099100.1 PE=4 SV=1	24.6032	14	142	4	504	53.377	6.77	101245444	LOC101245444; Solyc12g099100.1	12	cellular homeostasis;metabolic process;regulation of biological process		catalytic activity;nucleotide binding	Pf00070, Pf02852, Pf07992, Pf12831	80.9	117	114.1	1.44623	1.41038	0.975214	8.326	3763.59
Q9FXS7	EIG-I24 protein OS=Nicotiana tabacum GN=EIG-I24 PE=2 SV=1	10.4072	4	7	4	442	49.976	6.14				metabolic process		catalytic activity	Pf02458	60.7	118.2	116	1.94728	1.91104	0.981387	0.509	132.168
B2LT58	Elongation factor 1 gamma-like protein OS=Nicotiana tabacum PE=2 SV=1	12.9496	4	7	4	417	47.571	6.05				metabolic process	mitochondrion	protein binding;RNA binding	Pf00043, Pf00647, Pf02798, Pf13409, Pf13410, Pf13417, Pf14497	154.7	55.3	51.7	0.357466	0.334195	0.934901	0.817	174.644
P68158	Elongation factor Tu, chloroplastic OS=Nicotiana tabacum GN=TUFA PE=3 SV=1	25.3138	10	25	4	478	51.924	6.81				metabolic process		catalytic activity;nucleotide binding;RNA binding	Pf00009, Pf03143, Pf03144, Pf14578	109.9	62.1	56.9	0.565059	0.517743	0.916264	2.728	504.964
P08252	Endochitinase A OS=Nicotiana tabacum GN=CHN48 PE=1 SV=2	21.2766	4	33	4	329	35.134	8.02				defense response;metabolic process;response to stimulus	vacuole	catalytic activity	Pf00182, Pf00187	31.4	189.1	77	6.02229	2.45223	0.407192	2.728	817.573
B7U9Z3	ER luminal-binding protein OS=Nicotiana benthamiana GN=BLP4 PE=2 SV=1	36.2819	23	176	4	667	73.443	5.15				cell organization and biogenesis		catalytic activity;nucleotide binding	Pf00012, Pf01968, Pf06723	58.6	159.5	101	2.72184	1.72355	0.633229	18.619	3340.3
K4AYM7	Eukaryotic translation initiation factor 3 subunit B OS=Solanum lycopersicum GN=Solyc01g088370.2 PE=3 SV=1	9.62343	5	6	4	717	82.667	5.33	101267059	LOC101267059; Solyc01g088370.2	1	cell organization and biogenesis;metabolic process;regulation of biological process	cytoplasm;cytosol;nucleus	nucleotide binding;protein binding;RNA binding	Pf00076, Pf08662	128.1	59.5	68.4	0.464481	0.533958	1.14958	0.315	175.707
U6BL46	Eukarytic translation initiation factor OS=Nicotiana clevelandii GN=eIF(iso)4E PE=2 SV=1	16.5	4	5	4	200	22.837	6.37				metabolic process	cytoplasm	RNA binding	Pf01652	79	119.5	102.1	1.51266	1.29241	0.854393	1.424	81.0406
A0A068JCD7	Fructokinase OS=Nicotiana tabacum GN=FRK2 PE=2 SV=1	39.4495	10	36	4	327	34.809	5.34				metabolic process		catalytic activity	Pf00294	79.4	123.6	99.4	1.55668	1.25189	0.804207	7.031	1053.54
A0A075F2G1	Gamma-glutamylhydrolase 2 OS=Nicotiana tabacum GN=GGH2 PE=2 SV=1	15.7895	4	5	4	342	38.103	8.37				metabolic process		catalytic activity	Pf07722	69.3	149.8	115.1	2.16162	1.66089	0.768358	0.778	118.782
Q8L6A0	Glutamate dehydrogenase OS=Nicotiana tabacum GN=gdh1 PE=2 SV=1	21.4112	7	20	4	411	44.56	7.05				metabolic process		catalytic activity	Pf00208, Pf02812	95.4	134	92	1.40461	0.964361	0.686567	1.512	496.253
J7EYL4	GRX1 OS=Nicotiana benthamiana PE=2 SV=1	19.1275	4	5	4	298	32.863	8.88				cellular homeostasis;metabolic process;regulation of biological process		catalytic activity	Pf00462, Pf04908	155.2	55.8	59.2	0.359536	0.381443	1.06093	0.585	99.08
K9JIF8	Heat shock protein 90-1 OS=Nicotiana attenuata PE=2 SV=1	16.309	9	12	4	699	80.168	5.03				metabolic process;response to stimulus		nucleotide binding;protein binding	Pf00183, Pf02518, Pf13589	85.8	129.1	91.9	1.50466	1.0711	0.711851	0.756	383.674
Q7XAF5	Hexokinase OS=Nicotiana benthamiana GN=HXK1 PE=2 SV=1	25.3521	9	14	4	497	53.855	6.48				cellular homeostasis;metabolic process		catalytic activity;nucleotide binding	Pf00349, Pf03727	122.3	73.8	71.1	0.603434	0.581357	0.963415	1.683	384.285
O82030	Histidinol-phosphate aminotransferase, chloroplastic OS=Nicotiana tabacum GN=HPA PE=2 SV=1	9.92736	4	8	4	413	46.299	6.46				metabolic process		catalytic activity	Pf00155	89	116.7	106.1	1.31124	1.19213	0.909169	0.425	149.44
G8Z261	Hop-interacting protein THI032 OS=Solanum lycopersicum GN=Solyc12g099930.1 PE=2 SV=1	18.9526	6	141	4	401	43.976	8.05	101055519	LOC101055519; Solyc12g099930.1	12	metabolic process	extracellular;membrane	catalytic activity	Pf00266	100.3	94.1	111.4	0.938185	1.11067	1.18385	5.579	4135.84
Q43584	HSR203J OS=Nicotiana tabacum GN=hsr203J PE=4 SV=1	24.7761	8	20	4	335	37.52	5.45				metabolic process		catalytic activity	Pf07859, Pf10340	31.1	191	88.7	6.14148	2.85209	0.464398	3.806	445.265
W8SVJ4	Indole-3-glycerol phosphate synthase OS=Nicotiana tabacum PE=2 SV=1	11.6337	5	11	4	404	44.406	5.77				metabolic process		catalytic activity	Pf00218	121.1	89.1	84.9	0.735756	0.701073	0.952862	0.743	232.53
Q9AVG8	Isopentenyl diphosphate isomerase 1 OS=Nicotiana tabacum GN=ipi1 PE=2 SV=1	30.3448	7	24	4	290	33.182	6.37				metabolic process		catalytic activity	Pf00293	79.8	102.7	100.1	1.28697	1.25439	0.974684	2.899	540.483
Q9FSF0	Malate dehydrogenase OS=Nicotiana tabacum GN=MD1 PE=1 SV=1	47.5904	12	420	4	332	35.385	6.32				metabolic process	cytoplasm	catalytic activity	Pf00056, Pf02866	80.8	105.9	119.7	1.31064	1.48144	1.13031	280.838	11752.4
K4B6N4	Malate dehydrogenase OS=Solanum lycopersicum GN=Solyc02g063490.2 PE=3 SV=1	23.8636	8	116	4	352	36.836	7.96	101249428	LOC101249428; Solyc02g063490.2	2	metabolic process;regulation of biological process		catalytic activity	Pf00056, Pf01073, Pf02866	64.2	92.2	91.8	1.43614	1.42991	0.995662	6.943	3245.94
M1CGF9	Malate dehydrogenase OS=Solanum tuberosum GN=PGSC0003DMG400026029 PE=3 SV=1	26.2048	6	66	4	332	35.665	7.74	102585937	LOC102585937; PGSC0003DMG400026029	1	metabolic process		catalytic activity	Pf00056, Pf02866, Pf13460	116	106.4	90.9	0.917241	0.783621	0.854323	2.831	2226.87
A0A076L2G4	Mevalonate disphosphate decarboxylase OS=Nicotiana tabacum PE=2 SV=1	12.201	4	5	4	418	46.034	6.55				metabolic process	cytosol	catalytic activity;nucleotide binding		89.2	80.1	91.8	0.897982	1.02915	1.14607	0.585	73.1144
Q941P9	Non-symbiotic hemoglobin 2 OS=Solanum lycopersicum GN=HB2 PE=2 SV=1	19.8718	4	24	4	156	17.744	6.21	543822	Glb2; Solyc03g071690.2	3	metabolic process;transport		metal ion binding	Pf00042	147.8	73.2	69.5	0.495264	0.47023	0.949454	4.179	342.389
W6JJB7	Nuclear pore complex protein Sec13c OS=Nicotiana benthamiana GN=NbSec13c PE=2 SV=1	33.1126	6	13	4	302	32.626	6.3						protein binding	Pf00400, Pf12657	82	115.7	102.4	1.41098	1.24878	0.885048	2.384	355.045
K4BJV9	Nucleoside diphosphate kinase OS=Solanum lycopersicum GN=Solyc03g110960.2 PE=3 SV=1	15.0215	4	22	4	233	25.515	8.46	101244761	LOC101244761; Solyc03g110960.2	3	metabolic process;regulation of biological process;response to stimulus	cytoplasm;nucleus	catalytic activity;nucleotide binding	Pf00334	113.1	103.8	72.4	0.917772	0.640141	0.697495	3.642	658.85
Q42946	Oxygen-dependent coproporphyrinogen-III oxidase, chloroplastic OS=Nicotiana tabacum GN=CPX PE=2 SV=1	15.3652	6	31	4	397	44.907	7.77				metabolic process		catalytic activity;protein binding	Pf01218	129.3	86.8	86.7	0.671307	0.670534	0.998848	2.02	851.954
Q9XIV9	Peroxidase OS=Nicotiana tabacum PE=2 SV=1	22.4299	5	21	4	321	34.348	9.26				metabolic process;response to stimulus	extracellular	antioxidant activity;catalytic activity;metal ion binding	Pf00141	73.5	130.7	92.9	1.77823	1.26395	0.710788	2.594	450.505
Q2V9C6	Phosphoglycerate kinase OS=Solanum tuberosum PE=2 SV=1	41.791	14	79	4	402	42.512	6.47	102606065	LOC102606065		metabolic process	extracellular;membrane;nucleus	catalytic activity;nucleotide binding	Pf00162	69.5	104.7	137.4	1.50647	1.97698	1.31232	4.179	2190.38
Q42962	Phosphoglycerate kinase, cytosolic OS=Nicotiana tabacum PE=2 SV=1	48.3791	17	105	4	401	42.338	5.97				metabolic process	cytoplasm	catalytic activity;nucleotide binding	Pf00162	64.9	99	144.8	1.52542	2.23112	1.46263	18.783	2900.97
K4BT02	Phosphoribosylformylglycinamidine cyclo-ligase OS=Solanum lycopersicum GN=Solyc04g058090.2 PE=3 SV=1	13.3663	4	14	4	404	42.621	5.4	101246417	LOC101246417; Solyc04g058090.2	4	metabolic process	cytoplasm;mitochondrion	catalytic activity;metal ion binding	Pf00586, Pf02769	90.4	119.6	105.7	1.32301	1.16925	0.883779	0.957	377.853
A0A0C5AT01	Photosystem II protein D1 OS=Capsicum lycianthoides GN=psbA PE=3 SV=1	8.78187	4	47	4	353	38.913	5.25	23630294	psbA		metabolic process;response to stimulus;transport	membrane	catalytic activity;metal ion binding	Pf00124	196.8	43.1	46.4	0.219004	0.235772	1.07657	13.678	1218.77
P50471	Probable glutathione S-transferase MSR-1 OS=Nicotiana plumbaginifolia GN=MSR-1 PE=2 SV=1	11.4155	4	8	4	219	25.253	6.3				metabolic process;regulation of biological process;response to stimulus		catalytic activity;protein binding	Pf00043, Pf02798, Pf13409, Pf13410, Pf13417	33.4	86.6	69.4	2.59281	2.07784	0.801386	1.154	139.672
M1C263	Proteasome subunit beta type OS=Solanum tuberosum GN=PGSC0003DMG400022569 PE=3 SV=1	24.6637	5	17	4	223	24.586	6.76	102595078	LOC102595078; PGSC0003DMG400022569	3	metabolic process	cytoplasm;nucleus;proteasome	catalytic activity	Pf00227	87.1	85.9	108	0.986223	1.23995	1.25728	2.728	369.402
M1AZ99	Protein disulfide-isomerase OS=Solanum tuberosum GN=PGSC0003DMG400012875 PE=3 SV=1	15.4529	9	40	4	563	62.852	4.83	102585666	LOC102585666; PGSC0003DMG400012875	4	cellular homeostasis;metabolic process;regulation of biological process	endoplasmic reticulum	catalytic activity	Pf00085, Pf13098, Pf13848, Pf13899, Pf13905	59.7	96.2	96	1.61139	1.60804	0.997921	3.146	871.283
Q03198	Proteinase inhibitor I-A OS=Nicotiana tabacum GN=TIMPB PE=2 SV=1	35.514	4	11	4	107	11.872	8				regulation of biological process;response to stimulus	extracellular	enzyme regulator activity	Pf00280	38.9	136.3	54.5	3.50386	1.40103	0.399853	20.544	189.31
I1V1X6	Putative beta-D-xylosidase OS=Nicotiana tabacum PE=2 SV=1	5.81542	4	4	4	791	87.235	7.15				metabolic process		catalytic activity	Pf00933, Pf01915, Pf14310	72.9	132.8	114.7	1.82167	1.57339	0.863705	0.216	85.06
Q93X31	Putative beta5 proteasome subunit (Fragment) OS=Nicotiana tabacum GN=b5 PE=2 SV=1	31.6092	4	20	4	174	18.598	9.14				metabolic process	proteasome	catalytic activity	Pf00227	70.7	130.8	113.6	1.85007	1.60679	0.868502	2.831	674.9
Q93X29	Putative beta7 proteasome subunit (Fragment) OS=Nicotiana tabacum GN=b7 PE=2 SV=1	34.1085	4	10	4	129	14.66	8.4				metabolic process	proteasome	catalytic activity	Pf00227	84.8	102.2	115.2	1.20519	1.35849	1.1272	13.678	235.225
C9DFB6	Putative uncharacterized protein (Fragment) OS=Nicotiana benthamiana PE=2 SV=1	24.5509	5	24	4	167	18.165	6.57				metabolic process		catalytic activity	Pf00175	67.9	150.6	123.1	2.21797	1.81296	0.817397	3.924	440.908
Q5ECP6	Pyruvate dehydrogenase E1 component subunit alpha OS=Petunia hybrida GN=E1aPDH PE=2 SV=1	10.2564	5	12	4	390	43.183	7.91				metabolic process		catalytic activity	Pf00676	76.6	77.7	105.3	1.01436	1.37467	1.35521	1.31	169.191
Q42954	Pyruvate kinase, cytosolic isozyme OS=Nicotiana tabacum PE=2 SV=1	12.4016	4	7	4	508	55.097	6.84				metabolic process	cytoplasm	catalytic activity;metal ion binding;nucleotide binding	Pf00224, Pf02887	109.7	86.3	90.4	0.786691	0.824066	1.04751	0.585	136.133
Q9STA6	RAD23 protein OS=Solanum lycopersicum GN=rad23 PE=2 SV=1	21.5938	6	13	4	389	41.483	4.75	101246007	rad23; LOC101246007; Solyc02g085840.2	2	metabolic process;response to stimulus	nucleus	DNA binding;protein binding	Pf00240, Pf00627, Pf09280, Pf11976	92.9	103.9	107.4	1.11841	1.15608	1.03369	2.415	185.975
A7LH85	Ran binding protein OS=Nicotiana benthamiana PE=2 SV=1	32.5792	5	25	4	221	24.778	4.78				transport		protein binding	Pf00568, Pf00638	88	103.2	105.5	1.17273	1.19886	1.02229	9	534.54
Q307Y8	Ribosomal protein L11-like protein OS=Solanum tuberosum GN=PGSC0003DMG402010558 PE=2 SV=1	24.3094	4	30	4	181	20.777	9.92	102598285; 102606209; 102584908; 102584982	LOC102598285; LOC102606209; LOC102584908; LOC102584982; PGSC0003DMG400007855; PGSC0003DMG400020434; PGSC0003DMG400026398; PGSC0003DMG402010558	12; 7; 2; 10	metabolic process	cytosol;membrane;ribosome;vacuole	structural molecule activity	Pf00281, Pf00673	97.6	103	115.6	1.05533	1.18443	1.12233	9	745.563
Q6RYC4	Ribosomal protein L19 OS=Capsicum annuum PE=2 SV=1	15.5172	4	41	4	232	26.714	11.03				metabolic process	ribosome	structural molecule activity	Pf01280	86.3	118.9	117.4	1.37775	1.36037	0.987384	30.623	861.391
Q6TKR0	Ribosomal protein L3A OS=Nicotiana tabacum GN=RPL3A PE=2 SV=1	25.7069	14	72	4	389	44.367	10.08				metabolic process	ribosome	structural molecule activity	Pf00297	94.8	116.5	109.4	1.2289	1.15401	0.939056	9.89	1048.82
A0A076L2E2	Ribosomal protein S25 OS=Nicotiana tabacum PE=2 SV=1	29.9065	4	29	4	107	11.762	10.73					ribosome		Pf03297	109.7	88.6	108.8	0.807657	0.991796	1.22799	20.544	585.777
E5KUU8	Ribulose-1,5-bisphosphate carboxylase/oxygenase large subunit (Fragment) OS=Anisodus acutangulus GN=rbcL PE=3 SV=1	44.6623	32	2150	4	459	50.847	6.64				metabolic process		catalytic activity;metal ion binding	Pf00016, Pf02788	90.3	83.8	111.1	0.928018	1.23034	1.32578	11005.9	33213.1
Q9MUE2	S-adenosyl-L-methionine Mg-protoporphyrin IX methyltranserase OS=Nicotiana tabacum GN=Chl M PE=2 SV=1	14.7692	4	5	4	325	35.266	6.7				metabolic process	cytoplasm	catalytic activity	Pf01170, Pf01209, Pf05175, Pf06325, Pf07109, Pf08241, Pf08242, Pf12847, Pf13489, Pf13649, Pf13847	137.8	85.5	78	0.620464	0.566038	0.912281	0.551	136.47
S6A7M5	S-methyl-5-thioribose kinase OS=Nicotiana attenuata PE=2 SV=1	9.52381	4	6	4	420	47.787	6.37				metabolic process		catalytic activity	Pf01636	57.6	112.3	116.6	1.94965	2.02431	1.03829	0.585	157.23
K4C261	Serine hydroxymethyltransferase OS=Solanum lycopersicum GN=Solyc05g053810.2 PE=3 SV=1	14.4374	7	25	4	471	52.026	7.08	101256090	LOC101256090; Solyc05g053810.2	5	cell organization and biogenesis;development;metabolic process		catalytic activity	Pf00155, Pf00464	44.7	107.1	170.9	2.39597	3.82327	1.5957	1.346	592.84
K4C9B4	Serine/threonine-protein phosphatase OS=Solanum lycopersicum GN=Solyc06g073960.2 PE=3 SV=1	4.81928	4	5	4	996	106.165	6.01	101260541	LOC101260541; Solyc06g073960.2	6	metabolic process;regulation of biological process;response to stimulus	cytosol;membrane	catalytic activity;metal ion binding;protein binding	Pf00149, Pf01344, Pf07646, Pf13418	71.8	137.9	100.1	1.92061	1.39415	0.725888	0.179	65.65
O82463	SKP1-like protein OS=Nicotiana clevelandii PE=2 SV=1	56.8627	9	20	4	153	17.369	4.65				metabolic process			Pf01466, Pf03931	78	98.4	97.4	1.26154	1.24872	0.989837	17.738	562.782
A0A076L2G1	Sulfurtransferase OS=Nicotiana tabacum PE=2 SV=1	11.1702	4	9	4	376	41.389	7.27				metabolic process		catalytic activity	Pf00581	113.7	95.2	100.4	0.837291	0.883026	1.05462	0.616	225.128
C9DFC1	Thioredoxin H-type 1 (Fragment) OS=Nicotiana benthamiana GN=TRXh PE=2 SV=1	46.2185	6	31	4	119	13.289	5.82				cellular homeostasis;metabolic process;regulation of biological process		catalytic activity	Pf00085, Pf08534, Pf13098, Pf13899, Pf13905, Pf14595	82	58.7	76.1	0.715854	0.928049	1.29642	15.681	555.312
K4D2P9	Thioredoxin reductase OS=Solanum lycopersicum GN=Solyc10g080080.1 PE=3 SV=1	10.4972	4	7	4	543	58.915	6.84	101254347	LOC101254347; Solyc10g080080.1	10	cellular homeostasis;metabolic process;regulation of biological process;response to stimulus	cytoplasm	antioxidant activity;catalytic activity;enzyme regulator activity;nucleotide binding	Pf00070, Pf00085, Pf00462, Pf05768, Pf07992, Pf13098, Pf13192, Pf13738	171	68.3	66.8	0.399415	0.390643	0.978038	0.61	185.487
A0MWB6	Transcriptional coactivator multiprotein bridging factor OS=Solanum lycopersicum GN=MBF1 PE=2 SV=1	24.4604	5	7	4	139	15.325	10.04	100037506	MBF1	10	regulation of biological process		DNA binding	Pf01381, Pf08523, Pf12844, Pf13560	93.8	105.8	80.9	1.12793	0.862473	0.76465	3.329	97.6
K4B3X5	Triosephosphate isomerase OS=Solanum lycopersicum GN=Solyc01g111120.2 PE=3 SV=1	34.0491	14	130	4	326	34.644	6.89	101246286	LOC101246286; Solyc01g111120.2	1	metabolic process		catalytic activity	Pf00121	131.7	74.8	81.1	0.567957	0.615793	1.08422	182.298	2657.19
Q6TNI9	UDP-D-apiose/UDP-D-xylose synthase OS=Nicotiana benthamiana GN=AXS1 PE=2 SV=1	14.2119	5	16	4	387	43.3	6.04				metabolic process		catalytic activity	Pf01073, Pf01113, Pf01370, Pf03435, Pf07993	100	103.4	103.1	1.034	1.031	0.997099	1.031	318.707
M0ZN76	UMP-CMP kinase OS=Solanum tuberosum GN=PGSC0003DMG400001709 PE=3 SV=1	19.1388	4	6	4	209	22.97	5.73		PGSC0003DMG400001709	1	metabolic process	cytoplasm;cytosol;extracellular;nucleus	catalytic activity;nucleotide binding	Pf00406, Pf02223, Pf13207, Pf13238, Pf13671	126.9	53.1	64.5	0.41844	0.508274	1.21469	1.154	102.257
K4BKT6	Uncharacterized protein OS=Solanum lycopersicum GN=DXR PE=3 SV=1	12	4	4	4	475	51.465	6.35	543682	DXR; Solyc03g114340.2	3	metabolic process		catalytic activity;metal ion binding;nucleotide binding;protein binding	Pf02670, Pf08436, Pf13288	133	81.3	82.7	0.611278	0.621805	1.01722	0.346	100
K4AT14	Uncharacterized protein OS=Solanum lycopersicum GN=Solyc01g008160.2 PE=4 SV=1	9.0625	4	11	4	320	36.248	5.35	101245871	LOC101245871; Solyc01g008160.2	1			protein binding	Pf13414, Pf13424, Pf13432, Pf14559	100	99.6	98.1	0.996	0.981	0.98494	1.228	237.827
K4AT98	Uncharacterized protein OS=Solanum lycopersicum GN=Solyc01g009020.2 PE=4 SV=1	38.9381	6	88	4	113	12.64	8.28		Solyc01g009020.2	1	regulation of biological process		enzyme regulator activity	Pf00031	87.6	88.7	120.5	1.01256	1.37557	1.35851	165.81	3330
K4AXU5	Uncharacterized protein OS=Solanum lycopersicum GN=Solyc01g080510.2 PE=4 SV=1	11.5502	4	10	4	329	36.321	5.8	101268798	LOC101268798; Solyc01g080510.2	1			transporter activity		118.4	100.7	92.3	0.850507	0.779561	0.916584	1.637	197.57
K4AYP6	Uncharacterized protein OS=Solanum lycopersicum GN=Solyc01g088560.2 PE=3 SV=1	33.6538	7	15	4	208	23.084	7.9	101245584	LOC101245584; Solyc01g088560.2	1	regulation of biological process;response to stimulus;transport	endosome;membrane	nucleotide binding	Pf00025, Pf00071, Pf02421, Pf04670, Pf08477	89.9	95.9	78.2	1.06674	0.869855	0.815433	2.594	373.575
K4AZH0	Uncharacterized protein OS=Solanum lycopersicum GN=Solyc01g094290.2 PE=4 SV=1	3.25543	4	16	4	1198	128.696	5.02	101246664	LOC101246664; Solyc01g094290.2	1	transport	membrane	transporter activity	Pf00999, Pf01576, Pf02254, Pf03956, Pf05557, Pf10174, Pf12128	86	116.2	108.7	1.35116	1.26395	0.935456	0.633	444.98
K4B139	Uncharacterized protein OS=Solanum lycopersicum GN=Solyc01g100050.2 PE=4 SV=1	3.44523	4	5	4	1132	124.598	7.12	101262960	LOC101262960; Solyc01g100050.2	1	regulation of biological process		protein binding	Pf00400, Pf10607	59.9	165.6	85.9	2.76461	1.43406	0.51872	0.204	129.39
K4B375	Uncharacterized protein OS=Solanum lycopersicum GN=Solyc01g108600.2 PE=3 SV=1	21.1754	25	159	4	1072	120.518	5.78	101250549	LOC101250549; Solyc01g108600.2	1	metabolic process;response to stimulus	extracellular	catalytic activity;metal ion binding	Pf00675, Pf05193, Pf08367	97.2	108	107.7	1.11111	1.10802	0.997222	5.964	4695
K4B9B8	Uncharacterized protein OS=Solanum lycopersicum GN=Solyc02g078940.2 PE=4 SV=1	11.6923	4	11	4	325	34.647	7.21	101268548	LOC101268548; Solyc02g078940.2	2	metabolic process	cytosol	catalytic activity;metal ion binding	Pf00107, Pf08240, Pf13602	82.5	120	104.7	1.45455	1.26909	0.8725	0.995	249.879
K4B9W4	Uncharacterized protein OS=Solanum lycopersicum GN=Solyc02g080940.2 PE=3 SV=1	27.572	4	8	4	243	26.461	5.52		Solyc02g080940.2	2				Pf01168	93.4	104	98.3	1.11349	1.05246	0.945192	2.415	248.385
K4BB19	Uncharacterized protein OS=Solanum lycopersicum GN=Solyc02g085050.2 PE=3 SV=1	17.1642	4	39	4	268	30.158	6.55		Solyc02g085050.2	2	metabolic process	cytoplasm	catalytic activity;metal ion binding	Pf00719	86.8	121.4	108.3	1.39862	1.2477	0.892092	3.642	1477.03
K4BEC6	Uncharacterized protein OS=Solanum lycopersicum GN=Solyc03g007030.2 PE=4 SV=1	37.7551	4	25	4	98	10.596	9.28	101244055	LOC101244055; Solyc03g007030.2	3	metabolic process	mitochondrion		Pf09360	103.7	110.4	88.5	1.06461	0.853423	0.80163	38.811	576.99
K4BF35	Uncharacterized protein OS=Solanum lycopersicum GN=Solyc03g025620.2 PE=4 SV=1	31.0734	4	8	4	177	20.11	8.12		Solyc03g025620.2	3				Pf12580	109.4	81.3	103.2	0.743144	0.943327	1.26937	2.162	277.719
K4BI65	Uncharacterized protein OS=Solanum lycopersicum GN=Solyc03g082890.2 PE=4 SV=1	18.4549	4	75	4	233	25.313	7.12	101264410	LOC101264410; Solyc03g082890.2	3				Pf00805, Pf13599	128.6	86.5	91	0.672628	0.707621	1.05202	6.499	1956.88
K4BIB5	Uncharacterized protein OS=Solanum lycopersicum GN=Solyc03g083390.2 PE=4 SV=1	13.5762	4	13	4	302	33.569	5.48	101255475	LOC101255475; Solyc03g083390.2	3	development;metabolic process;regulation of biological process;response to stimulus	cytosol		Pf04969	81.9	98.3	87.7	1.20024	1.07082	0.892167	1.637	301.082
K4BIC0	Uncharacterized protein OS=Solanum lycopersicum GN=Solyc03g083440.2 PE=4 SV=1	2.56065	4	4	4	2226	243.773	6.9		Solyc03g083440.2	3	metabolic process;response to stimulus		catalytic activity;metal ion binding;nucleotide binding	Pf00070, Pf00310, Pf00890, Pf01266, Pf01493, Pf01593, Pf01645, Pf01946, Pf03486, Pf04898, Pf07992, Pf12831, Pf13450, Pf13454, Pf13738, Pf14691	75	94.6	118.5	1.26133	1.58	1.25264	0.071	67.06
K4BMT2	Uncharacterized protein OS=Solanum lycopersicum GN=Solyc03g121330.2 PE=4 SV=1	20.2797	4	21	4	143	15.934	10.52	101247801	LOC101247801; Solyc03g121330.2	3	metabolic process	membrane;ribosome	structural molecule activity	Pf01778	89.6	107.4	129.2	1.19866	1.44196	1.20298	4.012	567.183
K4BT58	Uncharacterized protein OS=Solanum lycopersicum GN=Solyc04g064670.2 PE=4 SV=1	14.4928	4	17	4	276	30.374	7.02	101259835	LOC101259835; Solyc04g064670.2	4	metabolic process		metal ion binding	Pf01789	89.6	130.4	99	1.45536	1.10491	0.759202	1.738	453.92
K4BTT5	Uncharacterized protein OS=Solanum lycopersicum GN=Solyc04g073970.2 PE=4 SV=1	17.77	4	4	4	287	30.669	6.07	101251468	LOC101251468; Solyc04g073970.2	4				Pf13266	101.7	99.4	106.4	0.977384	1.04621	1.07042	0.719	113.72
K4BV58	Uncharacterized protein OS=Solanum lycopersicum GN=Solyc04g079790.2 PE=3 SV=1	22.7848	4	21	4	237	26.279	10.11		Solyc04g079790.2	4	metabolic process	membrane;ribosome	structural molecule activity	Pf00380	142.3	65.6	113.8	0.460998	0.799719	1.73476	2.728	550.694
K4BVS6	Uncharacterized protein OS=Solanum lycopersicum GN=Solyc04g081970.2 PE=4 SV=1	12.5	4	21	4	296	33.437	7.71	101248098	LOC101248098; Solyc04g081970.2	4	cellular homeostasis;metabolic process;regulation of biological process		catalytic activity	Pf00085, Pf13098	133.2	55	83.6	0.412913	0.627628	1.52	1.239	533.356
K4BW14	Uncharacterized protein OS=Solanum lycopersicum GN=Solyc04g082880.2 PE=3 SV=1	6.16883	4	4	4	616	67.259	7.21	101245455	LOC101245455; Solyc04g082880.2	4	metabolic process	cytoplasm	catalytic activity;metal ion binding;nucleotide binding	Pf00365, Pf08696	101.9	89.7	87.1	0.880275	0.85476	0.971014	0.301	112.796
K4BY59	Uncharacterized protein OS=Solanum lycopersicum GN=Solyc05g013380.2 PE=4 SV=1	13.9293	7	25	4	481	53.381	7.05	101265236	LOC101265236; Solyc05g013380.2	5	metabolic process;response to stimulus	extracellular;membrane;vacuole	catalytic activity	Pf00155, Pf01212	81.1	90.2	77.7	1.11221	0.958076	0.861419	1.395	423.471
K4C030	Uncharacterized protein OS=Solanum lycopersicum GN=Solyc05g026490.2 PE=4 SV=1	9.60912	4	15	4	614	67.251	6.6	101267404	LOC101267404; Solyc05g026490.2	5	metabolic process		catalytic activity	Pf02878, Pf02879, Pf02880	121.5	94.9	87.6	0.78107	0.720988	0.923077	0.453	462.11
K4C286	Uncharacterized protein OS=Solanum lycopersicum GN=Solyc05g054070.2 PE=4 SV=1	10.4803	4	12	4	229	25.55	10.17	101250600	LOC101250600; Solyc05g054070.2	5	metabolic process	cytosol;membrane;ribosome	structural molecule activity	Pf01159, Pf03868	89.1	123.2	114.8	1.38272	1.28844	0.931818	1.783	206.827
K4C4W2	Uncharacterized protein OS=Solanum lycopersicum GN=Solyc06g035920.2 PE=4 SV=1	18.3784	4	9	4	185	20.507	7.9	101266641	LOC101266641; Solyc06g035920.2	6				Pf03763, Pf03766	193.2	24.6	48.9	0.127329	0.253106	1.9878	1.254	90.1315
K4C6T7	Uncharacterized protein OS=Solanum lycopersicum GN=Solyc06g061070.2 PE=3 SV=1	38.6503	4	120	4	163	17.489	4.82	101244882	LOC101244882; Solyc06g061070.2	6	metabolic process	nucleus		Pf01597	95.3	109.4	103	1.14795	1.0808	0.941499	9	2357.66
K4C7M7	Uncharacterized protein OS=Solanum lycopersicum GN=Solyc06g065990.1 PE=3 SV=1	16.1435	4	103	4	223	24.397	5.85	101263124	LOC101263124; Solyc06g065990.1	6	defense response;metabolic process;response to stimulus;transport	membrane	transporter activity	Pf00430	199.4	28.2	45	0.141424	0.225677	1.59574	9	3090.37
K4C841	Uncharacterized protein OS=Solanum lycopersicum GN=Solyc06g068670.2 PE=4 SV=1	16.6078	4	12	4	283	30.584	5.67	101249372	LOC101249372; Solyc06g068670.2	6	metabolic process				211.8	26	45.2	0.122757	0.213409	1.73846	1.976	236.995
K4CA37	Uncharacterized protein OS=Solanum lycopersicum GN=Solyc06g076790.1 PE=4 SV=1	20.7547	4	56	4	106	11.17	9.7	101259757	LOC101259757; Solyc06g076790.1	6				Pf11493	111.9	103.7	92.5	0.92672	0.826631	0.891996	22.714	666.542
K4CB67	Uncharacterized protein OS=Solanum lycopersicum GN=Solyc07g005960.2 PE=4 SV=1	8.60215	4	6	4	465	52.168	6.58	101251103	LOC101251103; Solyc07g005960.2	7	metabolic process	vacuole	catalytic activity	Pf00450	118.8	88.1	100.5	0.741582	0.84596	1.14075	0.468	102.03
K4CEA5	Uncharacterized protein OS=Solanum lycopersicum GN=Solyc07g042440.2 PE=4 SV=1	15.9624	4	12	4	213	23.525	9.42	101243905	LOC101243905; Solyc07g042440.2	7	metabolic process		antioxidant activity;catalytic activity	Pf00578, Pf02630, Pf08534, Pf13905	72.5	141.1	110.7	1.94621	1.5269	0.78455	1.929	172.961
K4CL66	Uncharacterized protein OS=Solanum lycopersicum GN=Solyc08g062820.2 PE=4 SV=1	19.2488	4	11	4	213	23.161	5.74	101252798	LOC101252798; Solyc08g062820.2	8		cytosol	protein binding	Pf03641	96.6	96.5	97	0.998965	1.00414	1.00518	3.329	449.046
K4CN08	Uncharacterized protein OS=Solanum lycopersicum GN=Solyc08g076450.2 PE=4 SV=1	9.09091	4	12	4	308	32.882	6.11	101260462	LOC101260462; Solyc08g076450.2	8	response to stimulus		catalytic activity	Pf01370, Pf13460	107.3	90.4	92.9	0.842498	0.865797	1.02765	1.069	73.7377
K4CNE7	Uncharacterized protein OS=Solanum lycopersicum GN=Solyc08g077880.2 PE=4 SV=1	16.1654	4	18	4	266	29.552	5.1	101248227	LOC101248227; Solyc08g077880.2	8				Pf00504	153.9	57.3	70.4	0.37232	0.45744	1.22862	1.512	439
K4CNG0	Uncharacterized protein OS=Solanum lycopersicum GN=Solyc08g078010.2 PE=4 SV=1	16.3551	4	26	4	214	23.913	9.95	101245574	LOC101245574; Solyc08g078010.2	8	metabolic process	membrane;ribosome	structural molecule activity	Pf01245	145.7	64.9	99.7	0.445436	0.684283	1.53621	5.813	401.28
K4CNT4	Uncharacterized protein OS=Solanum lycopersicum GN=Solyc08g079260.2 PE=4 SV=1	12.0853	4	8	4	422	45.569	5.02	101268416	LOC101268416; Solyc08g079260.2	8	response to stimulus	cytosol	protein binding	Pf13371, Pf13414, Pf13432	119.5	80.9	65.9	0.676987	0.551464	0.814586	0.701	231.45
K4CPW9	Uncharacterized protein OS=Solanum lycopersicum GN=Solyc08g083250.2 PE=4 SV=1	9.53947	5	13	4	608	68.55	6.57	101261842	LOC101261842; Solyc08g083250.2	8	metabolic process		catalytic activity;metal ion binding	Pf00149, Pf14008	40.1	105.4	129.1	2.62843	3.21945	1.22486	0.668	287.212
K4CQR5	Uncharacterized protein OS=Solanum lycopersicum GN=Solyc09g008800.2 PE=4 SV=1	13.5802	4	18	4	162	18.356	10.77	101249118	LOC101249118; Solyc09g008800.2	9				Pf01246	85.8	110.6	114.3	1.28904	1.33217	1.03345	4.623	447.749
K4CUF4	Uncharacterized protein OS=Solanum lycopersicum GN=Solyc09g065270.2 PE=3 SV=1	8.61423	4	20	4	267	29.977	9.26	101257700	LOC101257700; Solyc09g065270.2	9	cell organization and biogenesis;defense response;metabolic process;response to stimulus		metal ion binding	Pf01765	108.7	83	98	0.763569	0.901564	1.18072	1.154	394.338
K4CWB0	Uncharacterized protein OS=Solanum lycopersicum GN=Solyc09g090840.2 PE=3 SV=1	6.59722	4	23	4	576	63.916	6.87		Solyc09g090840.2	9	cell organization and biogenesis;metabolic process	mitochondrion	catalytic activity;nucleotide binding	Pf02637, Pf02934	118.2	90.7	105.1	0.767343	0.889171	1.15877	0.863	687.307
K4D3J0	Uncharacterized protein OS=Solanum lycopersicum GN=Solyc10g084040.1 PE=4 SV=1	14.1553	4	19	4	219	23.865	6.54	101245901	LOC101245901; Solyc10g084040.1	10				Pf04536	110.1	117.2	100.2	1.06449	0.910082	0.854949	2.455	353.89
K4D3L7	Uncharacterized protein OS=Solanum lycopersicum GN=Solyc10g084310.1 PE=3 SV=1	14.7887	4	16	4	142	15.725	10.45	101257002; 101252131; 101252449	LOC101257002; LOC101252131; LOC101252449; Solyc10g084310.1; Solyc10g086020.1; Solyc09g007350.2	9; 10	metabolic process	ribosome	structural molecule activity	Pf00164	88.2	118.4	106.8	1.3424	1.21088	0.902027	9	244.507
K4D4E7	Uncharacterized protein OS=Solanum lycopersicum GN=Solyc11g005340.1 PE=4 SV=1	11.7188	4	4	4	256	28.945	9.35	101262470	LOC101262470; Solyc11g005340.1	11			structural molecule activity	Pf04755	141.1	76.3	70.5	0.540751	0.499646	0.923984	0.719	80.07
K4D4E9	Uncharacterized protein OS=Solanum lycopersicum GN=Solyc11g005360.1 PE=3 SV=1	33.6957	4	5	4	92	10.312	7.44	101263959	LOC101263959; Solyc11g005360.1	11				Pf01722	106.9	81.3	114	0.760524	1.06642	1.40221	2.728	114.33
K4D5F9	Uncharacterized protein OS=Solanum lycopersicum GN=Solyc11g008990.1 PE=4 SV=1	21.2121	4	18	4	330	36.258	9.28	101257824	LOC101257824; Solyc11g008990.1	11	cell organization and biogenesis	chromosome		Pf03357, Pf04012, Pf10186	133	78.6	78.4	0.590977	0.589474	0.997455	1.994	603.6
K4DCR6	Uncharacterized protein OS=Solanum lycopersicum GN=Solyc12g013810.1 PE=4 SV=1	12.8492	5	55	4	179	19.328	8.97	101249435	LOC101249435; Solyc12g013810.1	12	cellular homeostasis;metabolic process;regulation of biological process		catalytic activity	Pf00085, Pf08534, Pf13098, Pf13899, Pf13905, Pf14595	133.9	105	95.5	0.784167	0.713219	0.909524	17.738	719.807
K4DEP4	Uncharacterized protein OS=Solanum lycopersicum GN=Solyc12g038970.1 PE=3 SV=1	11.2	4	8	4	375	41.529	5.24	101267493	LOC101267493; Solyc12g038970.1	12	metabolic process		catalytic activity	Pf04371	93.1	106.2	103.4	1.14071	1.11063	0.973635	0.874	146.577
M0ZH09	Uncharacterized protein OS=Solanum tuberosum GN=PGSC0003DMG400000214 PE=4 SV=1	7.20721	5	23	4	444	47.067	5.06		PGSC0003DMG400000214	1	defense response;metabolic process;response to stimulus	membrane			168	39.5	59.6	0.235119	0.354762	1.50886	0.823	476.685
M0ZHB0	Uncharacterized protein OS=Solanum tuberosum GN=PGSC0003DMG400000289 PE=3 SV=1	12.1032	6	20	4	504	54.652	6.16	102580877	LOC102580877; PGSC0003DMG400000289	12	metabolic process;response to stimulus	membrane	catalytic activity;metal ion binding;nucleotide binding	Pf00675, Pf05193	76.3	94.7	100.1	1.24115	1.31193	1.05702	1.754	419.174
M0ZKF0	Uncharacterized protein OS=Solanum tuberosum GN=PGSC0003DMG400001014 PE=3 SV=1	52.2059	15	286	4	408	44.598	4.87		PGSC0003DMG400001014	1	metabolic process;transport		catalytic activity;nucleotide binding;transporter activity	Pf00006, Pf00306, Pf00401, Pf02823	85.6	145.6	101.1	1.70093	1.18107	0.694368	63.495	7409.99
M0ZPZ4	Uncharacterized protein OS=Solanum tuberosum GN=PGSC0003DMG400002146 PE=4 SV=1	8.48485	4	13	4	495	52.53	8.91	102588617	LOC102588617; PGSC0003DMG400002146	6		chromosome;membrane		Pf05368, Pf13460	149.1	46.5	46.1	0.311871	0.309188	0.991398	0.607	422.073
M0ZTU6	Uncharacterized protein OS=Solanum tuberosum GN=PGSC0003DMG400003081 PE=4 SV=1	33.5938	4	8	4	128	14.725	6.87	102592706	LOC102592706; PGSC0003DMG400003081	2		cytosol	DNA binding	Pf01984	83.1	100.4	118.1	1.20818	1.42118	1.17629	2.594	96.846
M1ABN6	Uncharacterized protein OS=Solanum tuberosum GN=PGSC0003DMG400007410 PE=3 SV=1	37.069	4	27	4	116	11.537	4.68	102599598	LOC102599598; PGSC0003DMG400007410	11	metabolic process	ribosome	structural molecule activity	Pf00428	94.8	106.4	102.2	1.12236	1.07806	0.960526	9	620.493
M1ACM1	Uncharacterized protein OS=Solanum tuberosum GN=PGSC0003DMG400007658 PE=4 SV=1	7.88591	4	5	4	596	66.104	9.11	102591205	LOC102591205; PGSC0003DMG400007658	8	metabolic process			Pf00106, Pf01073, Pf01370, Pf05368, Pf08547, Pf08659, Pf13460	140.8	70.9	89	0.503551	0.632102	1.25529	0.343	98.81
M1AYQ6	Uncharacterized protein OS=Solanum tuberosum GN=PGSC0003DMG400012749 PE=4 SV=1	5.78313	4	26	4	415	43.313	6.16	102584452	LOC102584452; PGSC0003DMG400012749	1		extracellular		Pf02469	138.9	83.9	90.6	0.604032	0.652268	1.07986	1.581	495.218
M1AYY7	Uncharacterized protein OS=Solanum tuberosum GN=PGSC0003DMG400012800 PE=3 SV=1	17.3362	8	16	4	473	51.634	8.13	102582419	LOC102582419; PGSC0003DMG400012800	4	metabolic process;response to stimulus	membrane	catalytic activity;metal ion binding	Pf00202	55.8	138	113.8	2.47312	2.03943	0.824638	1.593	303.257
M1B7Y1	Uncharacterized protein OS=Solanum tuberosum GN=PGSC0003DMG400015165 PE=4 SV=1	15.142	4	49	4	317	34.061	6.16	102605195	LOC102605195; PGSC0003DMG400015165	3	metabolic process		catalytic activity	Pf00702, Pf13242, Pf13419	140.6	76.8	102.4	0.54623	0.728307	1.33333	2.793	1073.45
M1B9J5	Uncharacterized protein OS=Solanum tuberosum GN=PGSC0003DMG400015564 PE=4 SV=1	8.98876	4	5	4	356	38.182	6.57	102587356	LOC102587356; PGSC0003DMG400015564	11				Pf00190	59.5	121.5	117.5	2.04202	1.97479	0.967078	0.468	94.84
M1BAZ0	Uncharacterized protein OS=Solanum tuberosum GN=PGSC0003DMG400015920 PE=3 SV=1	5.95506	5	15	4	890	98.895	6.16	102604222	LOC102604222; PGSC0003DMG400015920	7		Golgi;membrane	nucleotide binding	Pf00012	49.9	139.6	123	2.7976	2.46493	0.881089	0.509	448.657
M1BCJ2	Uncharacterized protein OS=Solanum tuberosum GN=PGSC0003DMG400016332 PE=4 SV=1	24.3056	4	9	4	144	16.084	5.72	102600260	LOC102600260; PGSC0003DMG400016332	6	metabolic process		protein binding	Pf01920	105.6	74.5	81.4	0.705492	0.770833	1.09262	2.981	139.242
M1BCR3	Uncharacterized protein OS=Solanum tuberosum GN=PGSC0003DMG400016397 PE=4 SV=1	40.1361	4	9	4	147	16.286	5.71	102578214	LOC102578214; PGSC0003DMG400016397	1	metabolic process	cytosol	protein binding	Pf02996	113.2	56.7	72.2	0.500883	0.637809	1.27337	5.31	259.894
M1BUB0	Uncharacterized protein OS=Solanum tuberosum GN=PGSC0003DMG400020582 PE=4 SV=1	10.2669	4	7	4	487	53.579	6.05	102600424	LOC102600424; PGSC0003DMG400020582	9	cell organization and biogenesis;metabolic process;response to stimulus	cytosol	protein binding	Pf05694	105.4	93.3	91	0.885199	0.863378	0.975348	0.334	173.129
M1C3G7	Uncharacterized protein OS=Solanum tuberosum GN=PGSC0003DMG400022885 PE=3 SV=1	6.28684	4	4	4	509	54.606	5.82	102598345	LOC102598345; PGSC0003DMG400022885	3	metabolic process;response to stimulus	cytosol	catalytic activity	Pf00171	85	86.8	66.1	1.02118	0.777647	0.761521	0.374	72.6225
M1C779	Uncharacterized protein OS=Solanum tuberosum GN=PGSC0003DMG400023822 PE=4 SV=1	14.0625	4	6	4	256	29.065	5.48	102603436	LOC102603436; PGSC0003DMG400023822	6	metabolic process	extracellular	catalytic activity	Pf00657, Pf13472, Pf13552	122.4	70.8	84.6	0.578431	0.691176	1.19492	0.968	112.7
M1C8L6	Uncharacterized protein OS=Solanum tuberosum GN=PGSC0003DMG400024190 PE=4 SV=1	24.0933	7	49	4	386	40.725	4.77		PGSC0003DMG400024190	2	metabolic process;response to stimulus	cytosol;nucleus	DNA binding;protein binding	Pf00240, Pf00627, Pf09280, Pf11976	78.2	134.3	103.5	1.71739	1.32353	0.770663	13.678	1606.92
M1CBR3	Uncharacterized protein OS=Solanum tuberosum GN=PGSC0003DMG400024909 PE=3 SV=1	39.2523	7	16	4	214	23.775	6.6	102585266	LOC102585266; PGSC0003DMG400024909	1	regulation of biological process;response to stimulus;transport	cytosol;membrane	nucleotide binding	Pf00025, Pf00071, Pf01926, Pf08477	105.9	79	80.5	0.745987	0.760151	1.01899	3.642	454.763
M1CBR7	Uncharacterized protein OS=Solanum tuberosum GN=PGSC0003DMG400024913 PE=4 SV=1	10.8929	5	10	4	560	61.285	5.71		PGSC0003DMG400024913	1	transport	cytosol;membrane		Pf00928, Pf03998	55.5	161.2	102.7	2.9045	1.85045	0.637097	0.63	253.258
M1CFH9	Uncharacterized protein OS=Solanum tuberosum GN=PGSC0003DMG400025820 PE=3 SV=1	17.8172	25	151	4	1072	120.621	5.6	102580845	LOC102580845; PGSC0003DMG400025820	1	metabolic process;response to stimulus	extracellular	catalytic activity;metal ion binding	Pf00675, Pf05193, Pf08367	78.3	132.2	113.8	1.68838	1.45338	0.860817	5.964	3878.33
M1CK76	Uncharacterized protein OS=Solanum tuberosum GN=PGSC0003DMG400026946 PE=3 SV=1	20.2381	4	35	4	168	19.243	10.21	102591222	LOC102591222; PGSC0003DMG400026946	6	metabolic process	ribosome	structural molecule activity	Pf00831	140.9	79.8	98.1	0.566359	0.696238	1.22932	3.642	673.431
M1CKI1	Uncharacterized protein OS=Solanum tuberosum GN=PGSC0003DMG400027009 PE=4 SV=1	13.5838	4	5	4	346	39.86	5.83	102593792	LOC102593792; PGSC0003DMG400027009	6	metabolic process;regulation of biological process;response to stimulus		catalytic activity;protein binding	Pf01239	81.3	121.2	110.2	1.49077	1.35547	0.909241	0.668	163.3
M1CQE7	Uncharacterized protein OS=Solanum tuberosum GN=PGSC0003DMG400028208 PE=4 SV=1	38.4615	4	19	4	130	14.285	5.81		PGSC0003DMG400028208	10	metabolic process	membrane	catalytic activity	Pf01230, Pf11969	73.7	94.1	114.1	1.2768	1.54817	1.21254	6.743	575.132
M1D6Y6	Uncharacterized protein OS=Solanum tuberosum GN=PGSC0003DMG400033345 PE=4 SV=1	11.5265	4	11	4	321	35.919	7.93		PGSC0003DMG400033345	3	metabolic process		catalytic activity;nucleotide binding	Pf01243, Pf10615, Pf13883	99.8	107.7	96.5	1.07916	0.966934	0.896007	1.448	232.707
M0ZVR1	Uncharacterized protein OS=Solanum tuberosum GN=PGSC0003DMG402003567 PE=4 SV=1	37.2928	11	166	4	362	40.432	8.21	102591399	LOC102591399; PGSC0003DMG402003567	2	defense response;metabolic process;response to stimulus	extracellular	catalytic activity;RNA binding	Pf00175, Pf00667, Pf00970	133.2	85.2	106.3	0.63964	0.798048	1.24765	9	4706.01
M1B6P7	Uncharacterized protein OS=Solanum tuberosum GN=PGSC0003DMG402014796 PE=4 SV=1	12.4088	4	10	4	411	44.819	5.12	102582412	LOC102582412; PGSC0003DMG402014796	8		membrane	structural molecule activity	Pf04755	148	60.1	69	0.406081	0.466216	1.14809	0.957	189.332
A0A097BTV9	Vacuolar H+-ATPase A1 subunit isoform OS=Nicotiana tabacum PE=2 SV=1	30.4976	18	128	4	623	68.585	5.34				metabolic process;transport		catalytic activity;nucleotide binding;transporter activity	Pf00006, Pf00306, Pf02874	109.7	82.6	72.4	0.752963	0.659982	0.876513	12.789	3581.48
J7G1T0	Violaxanthin de-epoxidase OS=Nicotiana tabacum GN=VDE PE=4 SV=1	23.0126	9	24	4	478	54.55	6.55				metabolic process		catalytic activity	Pf07137	151.2	74.7	76.2	0.494048	0.503968	1.02008	2.162	447.286
P93212	14-3-3 protein 7 OS=Solanum lycopersicum GN=TFT7 PE=2 SV=2	22.619	6	28	3	252	28.796	5.03	544213	TFT7	4	regulation of biological process;response to stimulus	cytosol;membrane;mitochondrion	nucleotide binding;protein binding	Pf00244	96.7	83.7	102.9	0.865564	1.06412	1.22939	1.783	572.924
Q7XZV3	24K germin like protein OS=Nicotiana tabacum PE=2 SV=1	30	3	16	3	210	21.954	6.29					extracellular	metal ion binding	Pf00190, Pf07883	157	77.5	89	0.493631	0.566879	1.14839	9	444.712
Q08937	29 kDa ribonucleoprotein B, chloroplastic OS=Nicotiana sylvestris PE=2 SV=1	13.4021	3	12	3	291	31.095	5.03				metabolic process		nucleotide binding;RNA binding	Pf00076, Pf13893, Pf14259	181.4	55	61.7	0.303197	0.340132	1.12182	2.162	331.637
Q2XTB6	40S ribosomal protein S15-like OS=Solanum tuberosum PE=2 SV=1	19.7368	3	23	3	152	17.33	10.43	102590282	LOC102590282		metabolic process	ribosome	RNA binding;structural molecule activity	Pf00203	95.7	114.8	105.3	1.19958	1.10031	0.917247	6.499	239.23
K4C3B9	40S ribosomal protein S4 OS=Solanum lycopersicum GN=Solyc06g007360.2 PE=3 SV=1	26.1364	7	22	3	264	29.939	10.29	101246828	LOC101246828; Solyc06g007360.2	6	metabolic process	cytosol;membrane;ribosome	RNA binding;structural molecule activity	Pf00900, Pf08071	99.8	95.3	106.6	0.95491	1.06814	1.11857	3.642	352.59
K4CHJ6	40S ribosomal protein S8 OS=Solanum lycopersicum GN=Solyc07g065170.2 PE=3 SV=1	13.1222	3	9	3	221	25.015	10.42	101256398	LOC101256398; Solyc07g065170.2	7	metabolic process	cytosol;membrane;ribosome	structural molecule activity	Pf01201	81.6	134.7	113.1	1.65074	1.38603	0.839644	1.929	246.54
M1B539	40S ribosomal protein S8 OS=Solanum tuberosum GN=PGSC0003DMG400014381 PE=3 SV=1	18.552	4	11	3	221	24.966	10.46	102577526	LOC102577526; PGSC0003DMG400014381	10	metabolic process	cytosol;membrane;ribosome	structural molecule activity	Pf01201	81.1	125.1	113.9	1.54254	1.40444	0.910472	0.638	247.129
P30155	50S ribosomal protein L27, chloroplastic OS=Nicotiana tabacum GN=RPL27 PE=1 SV=1	18.9944	3	9	3	179	19.651	10.35				metabolic process	ribosome	structural molecule activity	Pf01016	167.9	50.8	92.5	0.302561	0.550923	1.82087	1.894	128.041
O80361	50S ribosomal protein L4, chloroplastic OS=Nicotiana tabacum GN=RPL4 PE=2 SV=1	20.5674	5	38	3	282	31.233	6.65				metabolic process	ribosome	RNA binding;structural molecule activity	Pf00573	134.1	85.8	98.9	0.639821	0.737509	1.15268	3.87	563.926
K4CJ96	6,7-dimethyl-8-ribityllumazine synthase OS=Solanum lycopersicum GN=Solyc08g015660.2 PE=3 SV=1	14.6552	3	15	3	232	25.088	7.8	101259864	LOC101259864; Solyc08g015660.2	8	metabolic process		catalytic activity	Pf00885	111	103.9	120.2	0.936036	1.08288	1.15688	0.52	384.163
H9CCH6	Acetyl-CoA carboxylase OS=Nicotiana tabacum GN=ACC PE=2 SV=1	23.3209	10	45	3	536	58.62	7.06				metabolic process		catalytic activity;metal ion binding;nucleotide binding	Pf00289, Pf01071, Pf02222, Pf02785, Pf02786, Pf07478, Pf08442, Pf08443, Pf13535, Pf15632	108.9	86.5	102.5	0.794307	0.94123	1.18497	2.57	1561.93
K4CBF0	Acetyltransferase component of pyruvate dehydrogenase complex OS=Solanum lycopersicum GN=Solyc07g006790.2 PE=3 SV=1	5.60579	3	4	3	553	59.597	8.16	101244498	LOC101244498; Solyc07g006790.2	7	metabolic process	organelle lumen	catalytic activity;metal ion binding	Pf00198, Pf00364, Pf02817	123.3	95.1	72.7	0.77129	0.589619	0.764458	0.199	77.46
K4CBC4	Adenylosuccinate lyase OS=Solanum lycopersicum GN=Solyc07g006530.2 PE=3 SV=1	5.49451	3	5	3	546	61.31	6.49	101263129	LOC101263129; Solyc07g006530.2	7	metabolic process		catalytic activity	Pf00206, Pf08328	115.2	89.4	91.3	0.776042	0.792535	1.02125	0.269	107.4
Q6T7E8	Adenylosuccinate synthetase, chloroplastic OS=Nicotiana tabacum GN=PURA PE=2 SV=1	30.495	11	49	3	505	55.183	7.65				metabolic process	cytoplasm	catalytic activity;metal ion binding;nucleotide binding	Pf00709	73.8	130.7	108.5	1.771	1.47019	0.830145	3.977	1281.37
K4BHG4	Alpha-1,4 glucan phosphorylase OS=Solanum lycopersicum GN=Solyc03g065340.2 PE=3 SV=1	4.65839	3	7	3	966	109.309	5.64	101252851	LOC101252851; Solyc03g065340.2	3	metabolic process;response to stimulus		catalytic activity	Pf00343	64.9	122.2	134.3	1.8829	2.06934	1.09902	0.166	236.08
E7BYE5	Alpha-mannosidase OS=Capsicum annuum PE=2 SV=1	8.05825	7	25	3	1030	116.459	6.74				metabolic process		catalytic activity;metal ion binding	Pf01074, Pf07748, Pf09261	117.9	103.3	95	0.876166	0.805768	0.919652	0.682	615.87
X5JM82	Ankyrin repeat domain containing protein OS=Nicotiana benthamiana GN=ANK PE=2 SV=1	46.9914	11	259	3	349	37.166	4.53						protein binding	Pf00023, Pf12796, Pf13606, Pf13637, Pf13857	108.5	88.2	109.3	0.812903	1.00737	1.23923	207.057	4484.23
E1AXT5	Apoplastic invertase OS=Solanum tuberosum GN=InvCD141 PE=4 SV=1	5.84192	3	4	3	582	65.991	9.38				metabolic process		catalytic activity	Pf00251, Pf08244	71.8	66.3	68.9	0.923398	0.95961	1.03922	0.07	121.47
V9TKE9	Ascorbate oxidase OS=Nicotiana tabacum GN=AO PE=2 SV=1	6.28272	3	7	3	573	64.508	8.5				metabolic process	extracellular	catalytic activity;metal ion binding	Pf00394, Pf07731, Pf07732	51.5	70.5	71.5	1.36893	1.38835	1.01418	0.562	158.7
M1B9T8	Aspartate aminotransferase OS=Solanum tuberosum GN=PGSC0003DMG400015637 PE=3 SV=1	8.37438	3	12	3	406	44.675	8.13	102579446	LOC102579446; PGSC0003DMG400015637	7	metabolic process	cytosol;membrane	catalytic activity;metal ion binding	Pf00155	88.6	85.2	128.5	0.961625	1.45034	1.50822	0.931	180.787
A8Y6H4	ATP synthase subunit beta (Fragment) OS=Physalis sp. P078 GN=atpB PE=3 SV=1	69.3452	18	697	3	336	35.939	5.29				metabolic process;transport	membrane	catalytic activity;nucleotide binding;transporter activity	Pf00006, Pf02874	210.4	36.2	58.2	0.172053	0.276616	1.60773	397.107	18770.6
O82722	ATP synthase subunit beta OS=Nicotiana sylvestris GN=nsatp2.2.1 PE=2 SV=1	62.0504	24	406	3	556	59.524	6.06	104229400	LOC104229400		metabolic process;transport		catalytic activity;nucleotide binding;transporter activity	Pf00006, Pf00306, Pf02874, Pf11421, Pf13191	76.7	104	113.4	1.35593	1.47849	1.09038	122.285	12876.6
Q8S8W8	ATP synthase subunit beta, chloroplastic OS=Atropa belladonna GN=atpB PE=3 SV=1	70.6827	25	1098	3	498	53.565	5.25	806520	atpB		metabolic process;transport	membrane	catalytic activity;nucleotide binding;transporter activity	Pf00006, Pf00306, Pf02874	147.3	48.8	79.2	0.331297	0.537678	1.62295	2394.03	27415.5
P26530	ATP synthase subunit beta, chloroplastic OS=Nicotiana rustica GN=atpB PE=3 SV=1	66.6667	22	792	3	498	53.437	5.25				metabolic process;transport	membrane	catalytic activity;nucleotide binding;transporter activity	Pf00006, Pf00306, Pf02874	90.5	79.1	112.1	0.874033	1.23867	1.41719	290.263	20936.6
P17614	ATP synthase subunit beta, mitochondrial OS=Nicotiana plumbaginifolia GN=ATPB PE=1 SV=1	61.6071	24	372	3	560	59.819	6.34				metabolic process;transport	membrane;mitochondrion	catalytic activity;nucleotide binding;protein binding;transporter activity	Pf00006, Pf00306, Pf02874	74.9	105.2	118.5	1.40454	1.58211	1.12643	75.27	12067.8
M1CH68	Beta-amylase OS=Solanum tuberosum GN=PGSC0003DMG400026199 PE=3 SV=1	5.96252	3	3	3	587	66.264	6.55		PGSC0003DMG400026199	7	metabolic process		catalytic activity	Pf01373, Pf08029	140.2	71.8	78.3	0.512126	0.558488	1.09053	0.259	76.55
Q43799	Beta-fructosidase (Beta-fructofuranosidase) OS=Nicotiana tabacum GN=Ntbfruc1 PE=2 SV=1	5.34483	3	4	3	580	65.794	9.09				metabolic process		catalytic activity	Pf00251, Pf08244	44.3	146.5	70.6	3.307	1.59368	0.481911	0.311	95.48
E3VJP9	Calcium-dependent protein kinase 10 OS=Nicotiana tabacum PE=2 SV=1	7.70578	3	5	3	571	63.929	5.82				metabolic process		catalytic activity;metal ion binding;nucleotide binding	Pf00036, Pf00069, Pf07714, Pf13202, Pf13405, Pf13499, Pf13833	72.8	97.7	88.6	1.34203	1.21703	0.906858	0.377	148.98
C5IJ81	Calmodulin isoform 1 OS=Solanum tuberosum GN=CaM1 PE=2 SV=1	46.3087	12	78	3	149	16.949	4.27	102577507	LOC102577507				metal ion binding	Pf00036, Pf12763, Pf13202, Pf13405, Pf13499, Pf13833, Pf14658	66.3	150.2	100	2.26546	1.5083	0.665779	999	1260.59
Q1HER6	Cathepsin B OS=Nicotiana benthamiana GN=CathB PE=2 SV=1	9.26966	3	5	3	356	39.406	5.91				metabolic process;regulation of biological process		catalytic activity	Pf00112, Pf08127	97.7	93.4	84.3	0.955988	0.862845	0.90257	0.778	142.38
Q40413	Cathepsin B-like cysteine proteinase OS=Nicotiana rustica GN=catch B PE=2 SV=1	9.26966	3	8	3	356	39.439	6.05				metabolic process;regulation of biological process		catalytic activity	Pf00112, Pf08127	147.8	78.5	76.8	0.531123	0.519621	0.978344	0.585	146.124
Q33DL3	Chalcone--flavonone isomerase OS=Nicotiana tabacum GN=CHI PE=2 SV=1	13.1148	3	4	3	244	26.41	5.1				metabolic process		catalytic activity	Pf02431	106.6	103.1	105.9	0.967167	0.993433	1.02716	0.778	122.49
B6RCM0	Chilling-responsive protein OS=Nicotiana tabacum PE=2 SV=1	10.625	3	5	3	320	35.718	5				response to stimulus			Pf03168	109.2	79.7	66.5	0.729853	0.608974	0.834379	0.585	119.76
K7WJR7	Chlorophyll a/b-binding protein OS=Solanum tuberosum PE=2 SV=1	10.3321	3	4	3	271	29.433	5.2				metabolic process;response to stimulus	membrane	metal ion binding	Pf00504	190.3	23.9	27.9	0.125591	0.146611	1.16736	0.701	174.02
A0A088F9I1	Chloroplast ATP-dependent Clp protease chaperone protein OS=Nicotiana benthamiana GN=ClpC1A PE=2 SV=1	15.2318	13	17	3	906	100.622	6.55				metabolic process		catalytic activity;nucleotide binding;protein binding	Pf00004, Pf00910, Pf02151, Pf02861, Pf06309, Pf07724, Pf07728, Pf10431, Pf13177, Pf13191, Pf13401	107.3	105.5	86.6	0.983225	0.807083	0.820853	0.833	414.109
C5IU71	Chloroplast sedoheptulose-1,7-bisphosphatase OS=Solanum lycopersicum GN=SBPase PE=2 SV=1	21.5736	10	173	3	394	42.561	6.4	100316873	SBPase; Solyc05g052600.2	5	defense response;metabolic process;response to stimulus	extracellular	catalytic activity	Pf00316	122.8	98.5	105.1	0.802117	0.855863	1.06701	5.422	3782.47
J7FMA4	Cinnamyl alcohol dehydrogenase OS=Nicotiana attenuata PE=2 SV=1	11.4846	4	8	3	357	39.073	5.99				metabolic process		catalytic activity;metal ion binding	Pf00107, Pf08240	47.3	69.5	97.8	1.46934	2.06765	1.40719	0.995	198.428
A0A088DBC4	Copper chaperone OS=Capsicum annuum GN=CCH PE=2 SV=1	29.3578	3	17	3	109	11.561	4.74				transport		metal ion binding	Pf00403	93.8	58.2	125.6	0.620469	1.33902	2.15808	14.849	545.039
T2BRU8	Cysteine protease CP6 OS=Nicotiana tabacum GN=CP6 PE=2 SV=1	6.65236	4	14	3	466	51.222	5.31				metabolic process		catalytic activity	Pf00112, Pf00396, Pf08246	63.8	136.2	109.2	2.1348	1.7116	0.801762	1.637	297.588
A0A075F933	Cysteine protease inhibitor OS=Nicotiana tabacum GN=CYS3 PE=2 SV=1	18.3267	5	26	3	251	28.081	6.07				metabolic process;regulation of biological process		catalytic activity;enzyme regulator activity	Pf00031	61.3	130	88.7	2.12072	1.44698	0.682308	4.412	373.967
K4CYL4	Cysteine synthase OS=Solanum lycopersicum GN=Solyc10g012370.2 PE=3 SV=1	15.9544	5	15	3	351	38.212	8.4	101253940	LOC101253940; Solyc10g012370.2	10	metabolic process	mitochondrion	catalytic activity	Pf00291	162.5	26.2	55.4	0.161231	0.340923	2.1145	0.896	305.161
P59702	Cytochrome b559 subunit alpha OS=Atropa belladonna GN=psbE PE=3 SV=3	37.3494	3	13	3	83	9.381	4.94	806444	psbE		metabolic process;transport	membrane	metal ion binding	Pf00283, Pf00284	214.1	20.9	27.9	0.0976179	0.130313	1.33493	5.31	452.996
A0A060B909	Cytochrome b6 OS=Capsicum annuum var. glabriusculum GN=petB PE=3 SV=1	21.1009	3	24	3	218	24.495	9.01				metabolic process;transport	membrane	catalytic activity;metal ion binding	Pf00033, Pf13631	137.5	30.3	26.8	0.220364	0.194909	0.884488	2.511	770.867
Q1A3E1	Cytochrome P450 CYP74C9 OS=Petunia integrifolia subsp. inflata GN=psr2 PE=2 SV=1	7.08333	3	4	3	480	54.172	6.39				metabolic process		catalytic activity;metal ion binding	Pf00067	68.7	105.8	86.6	1.54003	1.26055	0.818526	0.233	102.01
A0A0F7JLU6	Cytosolic glyceraldehyde-3-phosphate dehydrogenase 1 OS=Nicotiana benthamiana GN=GAPC1 PE=2 SV=1	49.7059	17	120	3	340	36.926	7.47				metabolic process		catalytic activity;nucleotide binding	Pf00044, Pf01113, Pf02800	86	138.6	73.5	1.61163	0.854651	0.530303	30.623	3356.44
A0A0F7JJ49	Cytosolic glyceraldehyde-3-phosphate dehydrogenase 3 OS=Nicotiana benthamiana GN=GAPC3 PE=2 SV=1	35.905	14	85	3	337	36.614	7.52				metabolic process		catalytic activity;nucleotide binding	Pf00044, Pf01113, Pf02800	106.2	70.8	75.5	0.666667	0.710923	1.06638	17.233	2023.17
Q8S3I6	D1 protease OS=Nicotiana plumbaginifolia GN=ctpA PE=2 SV=1	15.6448	5	11	3	473	51.828	8.59				metabolic process		catalytic activity;protein binding	Pf00595, Pf03572, Pf13180, Pf14684	89.4	127.4	99.7	1.42506	1.11521	0.782575	0.812	444.765
Q43364	Elongation factor TuB, chloroplastic OS=Nicotiana sylvestris GN=TUFB PE=2 SV=1	27.2165	9	25	3	485	52.655	6.35	104223071	LOC104223071		metabolic process		catalytic activity;nucleotide binding;RNA binding	Pf00009, Pf03143, Pf03144, Pf14578	107	57.6	52	0.538318	0.485981	0.902778	3.394	565.594
A0A0B5GNH2	Endoplasmic reticulum chaperone binding protein OS=Lycium chinense GN=BiP PE=2 SV=1	31.1747	21	186	3	664	73.115	5.19						nucleotide binding	Pf00012, Pf01968, Pf06723	28.3	188.3	112.6	6.65371	3.9788	0.597982	13.816	3760.83
A0A077D849	Eukaryotic translation initiation factor 5A OS=Nicotiana tabacum PE=2 SV=1	43.125	6	8	3	160	17.53	6.2				metabolic process;regulation of biological process		RNA binding	Pf01287	106.4	86	92	0.808271	0.864662	1.06977	2.511	151.24
F2VJ75	Fructose-bisphosphate aldolase OS=Nicotiana tabacum PE=2 SV=1	37.9397	18	226	3	398	42.779	6.79				metabolic process		catalytic activity	Pf00274	112.2	69.9	81	0.622995	0.721925	1.1588	82.176	6599.83
Q9XG68	FtsZ-like protein OS=Nicotiana tabacum GN=FtsZ PE=2 SV=1	8.59189	3	6	3	419	43.861	5.83				cell division;cell organization and biogenesis;metabolic process	cytoplasm	catalytic activity;nucleotide binding	Pf00091, Pf12327	143	74.8	76.5	0.523077	0.534965	1.02273	0.688	79.2245
Q95DV5	FtsZ-like protein OS=Nicotiana tabacum GN=ftsZ PE=2 SV=1	9.40171	3	3	3	468	49.144	5.69				cell organization and biogenesis;metabolic process	cytoplasm	catalytic activity;nucleotide binding	Pf00091, Pf12327	96.2	104.1	97.7	1.08212	1.01559	0.938521	0.334	77.2467
B7XH28	GDP-mannose 4,6-dehydratase OS=Nicotiana benthamiana GN=GMD PE=2 SV=2	9.26431	3	6	3	367	41.424	7.05				metabolic process		catalytic activity	Pf01370, Pf02719, Pf04321, Pf09797, Pf13950	63.2	97.2	104.4	1.53797	1.6519	1.07407	0.369	116.96
B9A6I8	Germin like protein OS=Nicotiana tabacum GN=glp PE=2 SV=1	18.2692	3	40	3	208	21.408	6.29				regulation of biological process	extracellular	metal ion binding	Pf00190, Pf02311, Pf07883	148.5	101	83.2	0.680135	0.560269	0.823762	12.895	1283.79
A0A076KWF9	Gluaredoxin OS=Nicotiana tabacum PE=2 SV=1	48.1481	4	26	3	108	11.241	7.24				cellular homeostasis;metabolic process;regulation of biological process		catalytic activity	Pf00462	95.1	80	102.7	0.84122	1.07992	1.28375	9	960.898
Q67C43	Glutamate dehydrogenase alpha subunit (Fragment) OS=Nicotiana tabacum GN=gdh1 PE=2 SV=1	23.0508	4	13	3	295	31.566	5.12				metabolic process		catalytic activity	Pf00208, Pf02812	58.8	148.3	111.6	2.52211	1.89796	0.752529	2.981	459.9
Q69B32	Glutamine synthetase OS=Nicotiana attenuata PE=2 SV=1	4.16667	3	6	3	432	47.497	7.2				metabolic process		catalytic activity;nucleotide binding	Pf00120, Pf03951	52.9	39.5	35.3	0.746692	0.667297	0.893671	0.492	53.11
K4CIG0	Glutathione peroxidase OS=Solanum lycopersicum GN=Solyc08g006720.2 PE=3 SV=1	9.2437	3	10	3	238	26.187	9.06	101248896	LOC101248896; Solyc08g006720.2	8	metabolic process;response to stimulus	membrane	antioxidant activity;catalytic activity	Pf00255, Pf00578, Pf08534	147.7	59.5	73.7	0.402844	0.498984	1.23866	0.848	221.671
A0A077D837	Glutathione synthetase OS=Nicotiana tabacum PE=2 SV=1	7.20721	3	4	3	555	61.768	6.43				metabolic process		catalytic activity;metal ion binding;nucleotide binding;protein binding	Pf03199, Pf03917	96.5	76.9	98.4	0.796891	1.01969	1.27958	0.322	92.3
F8UV60	Glutathione transferase OS=Nicotiana benthamiana GN=GSTU4 PE=2 SV=1	14.0271	3	8	3	221	25.894	5.29				metabolic process		catalytic activity;protein binding	Pf00043, Pf02798, Pf13409, Pf13410, Pf13417, Pf14497	71.5	109.7	85.6	1.53427	1.1972	0.78031	1.254	92.37
A0A0D5NRV2	Glyceraldehyde-3-phosphate dehydrogenase OS=Capsicum annuum PE=2 SV=1	28.6976	13	49	3	453	48.289	6.84				metabolic process		catalytic activity;nucleotide binding	Pf00044, Pf02672, Pf02800	124	84.8	72.5	0.683871	0.584677	0.854953	3.532	929.682
F2Q9V9	Glyceraldehyde-3-phosphate dehydrogenase OS=Solanum tuberosum GN=gapdh PE=2 SV=1	19.3333	10	43	3	450	47.968	7.37	102606161	GAPDH		metabolic process;response to stimulus	extracellular;membrane	catalytic activity;nucleotide binding	Pf00044, Pf02672, Pf02800	113.6	97.5	81.5	0.858275	0.71743	0.835897	2.808	845.664
P27484	Glycine-rich protein 2 OS=Nicotiana sylvestris GN=GRP-2 PE=2 SV=1	26.6355	3	19	3	214	19.734	5.92	104218376	GRP-2		regulation of biological process		DNA binding;metal ion binding;RNA binding	Pf00098, Pf00313, Pf08206	99	101.2	100.4	1.02222	1.01414	0.992095	1.683	988.987
B6EWX2	Glycosyltransferase OS=Lycium barbarum GN=UGT73E5 PE=2 SV=1	6.16302	3	3	3	503	55.479	5.59				metabolic process		catalytic activity	Pf00201	68	146.5	80.9	2.15441	1.18971	0.552218	0.304	69.4033
P93365	Glycosyltransferase OS=Nicotiana tabacum GN=IS5a PE=2 SV=1	9.66387	4	7	3	476	53.58	6.07				metabolic process		catalytic activity	Pf00201	65.1	121.9	100.3	1.8725	1.54071	0.822806	0.73	139.863
E0X584	Harpin binding protein 1 (Fragment) OS=Nicotiana benthamiana GN=HBP1 PE=2 SV=1	21.3235	5	53	3	272	29.36	8.29						structural molecule activity	Pf04755	129.8	64	76.6	0.493066	0.590139	1.19687	4.412	828.837
G9BRR3	Heme oxygenase 1 OS=Nicotiana tabacum GN=HO1 PE=2 SV=1	10.7914	3	10	3	278	32.25	8.41				metabolic process		catalytic activity	Pf01126	179.9	35.2	46.1	0.195664	0.256253	1.30966	0.823	111.395
Q6Q8A4	Hexokinase OS=Nicotiana tabacum GN=Hxk3 PE=2 SV=1	20.9256	7	19	3	497	54.106	6.24				cellular homeostasis;metabolic process		catalytic activity;nucleotide binding	Pf00349, Pf03727	127.9	75.1	70.7	0.587177	0.552776	0.941411	1.894	478.45
J7ERA8	Hydroxycinnamoyl transferase (Fragment) OS=Nicotiana benthamiana PE=2 SV=1	10.8401	3	7	3	369	40.831	5.91				metabolic process		catalytic activity	Pf02458	42.4	105.7	136.3	2.49292	3.21462	1.2895	0.833	214.397
B5LAT1	Ketol-acid reductoisomerase OS=Capsicum annuum PE=2 SV=1	7.44501	3	11	3	591	63.31	6.95				metabolic process		catalytic activity;metal ion binding	Pf01450, Pf07991	92.7	93.5	101.2	1.00863	1.09169	1.08235	0.682	326.494
Q6QD76	L-galactono-1,4-lactone dehydrogenase OS=Capsicum annuum GN=GLDH1 PE=2 SV=2	13.4812	5	9	3	586	66.778	8.03				metabolic process	membrane	catalytic activity;nucleotide binding	Pf01565, Pf04030	110.8	83.4	80.2	0.752708	0.723827	0.961631	0.354	175.892
K4CLR1	Lactoylglutathione lyase OS=Solanum lycopersicum GN=Solyc08g066850.2 PE=3 SV=1	6.11111	3	13	3	360	39.876	5.25	101259466	LOC101259466; Solyc08g066850.2	8	metabolic process		catalytic activity;metal ion binding	Pf00903, Pf12681, Pf13468, Pf13669	92.6	140.5	98	1.51728	1.05832	0.697509	0.905	346.303
M1BCZ9	Lactoylglutathione lyase OS=Solanum tuberosum GN=PGSC0003DMG400016448 PE=3 SV=1	12.3288	3	27	3	292	32.791	5.62	102599485	LOC102599485; PGSC0003DMG400016448	2	metabolic process		catalytic activity;metal ion binding	Pf00903, Pf12681, Pf13669	88.6	106.8	118.6	1.20542	1.3386	1.11049	1.31	676.716
E5RPJ4	Malic enzyme (Fragment) OS=Nicotiana benthamiana GN=NADP-ME PE=2 SV=1	11.6541	5	8	3	532	58.74	5.5				metabolic process		catalytic activity;metal ion binding;nucleotide binding	Pf00390, Pf03949	79.9	100.4	91.7	1.25657	1.14768	0.913347	0.389	180.885
Q069K2	Methionine synthase OS=Nicotiana suaveolens PE=2 SV=1	28.8889	19	227	3	765	84.775	6.62				metabolic process		catalytic activity;metal ion binding	Pf01717, Pf08267	92.2	108.1	104.4	1.17245	1.13232	0.965772	6.979	6131.93
U3RJ91	Mitochondrial gamma aminobutyrate transaminase 1 OS=Nicotiana tabacum PE=2 SV=1	16.4062	7	66	3	512	56.152	6.86				metabolic process		catalytic activity	Pf00155, Pf00202	52.3	167.3	96.3	3.19885	1.8413	0.575613	2.535	1437.72
Q152U7	Multiprotein bridging factor 1c OS=Solanum lycopersicum GN=MBF1 PE=4 SV=1	23.5714	4	6	3	140	15.393	10.08	101245564	MBF1; LOC101245564; Solyc07g062400.2	7			DNA binding	Pf01381, Pf08523, Pf12844	95.2	97.6	87.8	1.02521	0.922269	0.89959	1.848	61.73
B5LAU2	NADPH--cytochrome P450 reductase OS=Capsicum annuum PE=2 SV=1	3.93586	3	3	3	686	76.025	5.3				metabolic process	endoplasmic reticulum;membrane	catalytic activity;metal ion binding;nucleotide binding	Pf00175, Pf00258, Pf00667	74.5	113.5	90.5	1.52349	1.21477	0.797357	0.179	62.805
D4IHB9	Nb cell deth marker OS=Nicotiana benthamiana GN=cdm PE=2 SV=1	15.4229	3	10	3	201	21.844	8.97				regulation of biological process		enzyme regulator activity	Pf00197	23.3	190.3	44.8	8.16738	1.92275	0.235418	1.894	184.354
Q40524	Nt-Rab11e protein (Fragment) OS=Nicotiana tabacum GN=Nt-Rab11e PE=2 SV=1	27.2727	4	9	3	209	23.399	5.73				regulation of biological process;response to stimulus;transport		nucleotide binding	Pf00025, Pf00071, Pf08477	106.4	80.2	76.2	0.753759	0.716165	0.950125	0.931	269.249
W6JLY0	Nuclear pore complex protein Nup50a OS=Nicotiana benthamiana GN=NbNup50a PE=2 SV=1	25	13	27	3	448	47.763	4.87				transport			Pf00638, Pf08911	89.8	138.2	94	1.53898	1.04677	0.680174	4.878	620.443
W6JJ80	Nuclear pore complex protein Nup50c OS=Nicotiana benthamiana GN=NbNup50c PE=2 SV=1	10.8352	3	3	3	443	47.582	4.93				transport			Pf00638, Pf08911	81.3	142.7	94.1	1.75523	1.15744	0.659425	0.259	96.68
W6JPQ8	Nuclear pore complex protein Nup50d OS=Nicotiana benthamiana GN=NbNup50d PE=2 SV=1	25.8929	13	26	3	448	47.815	4.77				transport			Pf00638, Pf08911	73.5	144	103.2	1.95918	1.40408	0.716667	3.771	625.223
D3U1X1	Nucleoside diphosphate kinase OS=Solanum tuberosum GN=NDPK1 PE=2 SV=1	13.0252	3	8	3	238	25.789	9.14	102577440	NDPK1		metabolic process;response to stimulus	membrane	catalytic activity;metal ion binding;nucleotide binding	Pf00334	144	82.3	55.9	0.571528	0.388194	0.679222	0.896	104.395
Q70Z19	Nucleosome assembly protein 1;1 OS=Nicotiana tabacum GN=NAP1;1 PE=1 SV=1	10.9626	3	5	3	374	42.552	4.44				cell organization and biogenesis	cytoplasm;nucleus		Pf00956	111.4	64.2	68.8	0.576302	0.617594	1.07165	1.154	147.062
Q70Z17	Nucleosome assembly protein 1;3 OS=Nicotiana tabacum GN=NAP1;3 PE=1 SV=1	10.8753	3	14	3	377	43.064	4.46				cell organization and biogenesis	cytoplasm;nucleus		Pf00956	105.2	56.7	64.9	0.538973	0.61692	1.14462	0.778	435.541
H2ESL0	Pathogenesis-related protein PR10 OS=Nicotiana tabacum GN=pr10 PE=2 SV=1	23.75	5	59	3	160	17.756	5.83				defense response;response to stimulus			Pf00407	29.3	79.3	176.6	2.70648	6.0273	2.22699	20.544	1829.14
B2BF99	Peptidyl-prolyl cis-trans isomerase OS=Nicotiana tabacum GN=Cyp2 PE=2 SV=1	17.8744	3	14	3	207	21.971	7.99				metabolic process		catalytic activity	Pf00160	70.4	108.2	101.5	1.53693	1.44176	0.938078	1.154	413.299
K4CIE2	Peptidyl-prolyl cis-trans isomerase OS=Solanum lycopersicum GN=Solyc08g006540.2 PE=4 SV=1	11.0266	3	69	3	263	28.12	8.82		Solyc08g006540.2	8	metabolic process		catalytic activity	Pf00254	95.4	125.1	103.1	1.31132	1.08071	0.824141	2.981	2903.29
M1CSR8	Peptidyl-prolyl cis-trans isomerase OS=Solanum tuberosum GN=PGSC0003DMG400028689 PE=3 SV=1	10.2857	3	8	3	175	18.835	7.81	102605090	LOC102605090; PGSC0003DMG400028689	11	metabolic process;response to stimulus	Golgi;mitochondrion	catalytic activity	Pf00160	83.6	115.6	108.7	1.38278	1.30024	0.940311	0.638	100.175
Q42964	Peroxidase OS=Nicotiana tabacum PE=3 SV=1	15.8385	3	35	3	322	34.504	4.89				metabolic process;response to stimulus	extracellular	antioxidant activity;catalytic activity;metal ion binding	Pf00141	52.1	146.6	130.6	2.81382	2.50672	0.890859	4.337	1305.11
K4BF11	Peroxidase OS=Solanum lycopersicum GN=Solyc03g025380.2 PE=3 SV=1	13.4375	4	55	3	320	34.356	8.19	101258529	LOC101258529; Solyc03g025380.2	3	metabolic process;response to stimulus	extracellular	antioxidant activity;catalytic activity;metal ion binding	Pf00141	24.6	96.2	185.6	3.91057	7.54472	1.92931	2.594	1772.72
D2CFQ1	Phenylalanine ammonia-lyase OS=Nicotiana attenuata GN=PAL1 PE=2 SV=1	16.4326	10	26	3	712	77.294	6.42				metabolic process	cytoplasm	catalytic activity	Pf00221	68.7	160.9	94.3	2.34207	1.37263	0.586078	1.276	551.548
P25872	Phenylalanine ammonia-lyase OS=Nicotiana tabacum GN=TPA1 PE=2 SV=1	16.0839	10	26	3	715	77.731	6.77				metabolic process	cytoplasm	catalytic activity	Pf00221	66.9	140.6	107.2	2.10164	1.60239	0.762447	1.356	600.526
Q8S917	Phosphoenolpyruvate carboxylase (Fragment) OS=Nicotiana sylvestris GN=Nsppc1 PE=4 SV=1	28	20	94	3	750	85.634	6.74				metabolic process		catalytic activity	Pf00311	89.5	101.9	114.2	1.13855	1.27598	1.12071	4.275	2054.46
M0ZMF8	Phosphoserine aminotransferase OS=Solanum tuberosum GN=PGSC0003DMG400001524 PE=3 SV=1	10.7551	3	7	3	437	47.736	8.1	102591400	LOC102591400; PGSC0003DMG400001524	2	metabolic process;response to stimulus		catalytic activity	Pf00266	100.4	90.5	100.3	0.901394	0.999004	1.10829	0.778	174.8
A0A060BCE9	Photosystem I P700 chlorophyll a apoprotein A1 OS=Capsicum annuum var. glabriusculum GN=psaA PE=3 SV=1	3.86667	3	6	3	750	82.966	7.18				metabolic process;transport	membrane	catalytic activity;metal ion binding	Pf00223	193.6	46.3	51.4	0.239153	0.265496	1.11015	0.292	50.9912
P29302	Photosystem I reaction center subunit II, chloroplastic OS=Nicotiana sylvestris GN=psaD PE=2 SV=1	26.4706	3	9	3	204	22.41	9.77	104242194	LOC104242194		metabolic process	membrane		Pf02531	224.8	32.2	35.6	0.143238	0.158363	1.10559	2.162	246.54
Q202M6	PII protein (Fragment) OS=Nicotiana tabacum PE=2 SV=1	33.0189	3	5	3	106	11.244	5.57				metabolic process;regulation of biological process		enzyme regulator activity	Pf00543	81.8	136.2	107	1.66504	1.30807	0.785609	1.783	146.687
E5L8B6	Plastid thioredoxin F OS=Nicotiana tabacum PE=2 SV=1	21.1429	3	10	3	175	19.005	8.79				cellular homeostasis;metabolic process;regulation of biological process		catalytic activity	Pf00085, Pf13098, Pf13899, Pf13905	183.5	62.4	71.3	0.340054	0.388556	1.14263	1.848	161.45
Q0W9E5	Plastocyanin OS=Solanum commersonii GN=pete PE=2 SV=1	29.8246	3	47	3	171	17.188	5.2						metal ion binding	Pf00127, Pf13473	127.1	100.9	95.4	0.793863	0.75059	0.945491	41.17	339.04
K4B0B7	Prefoldin subunit 4 OS=Solanum lycopersicum GN=Solyc01g097300.2 PE=3 SV=1	21.875	3	11	3	128	14.813	4.56	101260870	LOC101260870; Solyc01g097300.2	1	metabolic process	cytosol	protein binding	Pf01920	73	119.8	114.3	1.6411	1.56575	0.95409	2.162	216.764
P49332	Probable glutathione S-transferase parC OS=Nicotiana tabacum GN=PARC PE=2 SV=1	12.6697	3	7	3	221	25.726	6.13				metabolic process;regulation of biological process;response to stimulus		catalytic activity;protein binding	Pf00043, Pf02798, Pf13409, Pf13410, Pf13417, Pf14497	95.6	83.9	89.7	0.877615	0.938285	1.06913	1.154	115.921
O82797	Proliferating cell nuclear antigen OS=Nicotiana tabacum GN=PCNA PE=2 SV=1	14.0152	3	10	3	264	29.254	4.79				metabolic process;regulation of biological process	nucleus	DNA binding;enzyme regulator activity	Pf00705, Pf02747	146.3	58.1	68.1	0.397129	0.465482	1.17212	1.154	241.998
K4CG47	Proteasome subunit alpha type OS=Solanum lycopersicum GN=Solyc07g055080.2 PE=3 SV=1	23.8298	5	29	3	235	25.657	5.48	101247839	LOC101247839; Solyc07g055080.2	7	defense response;metabolic process;response to stimulus	cytoplasm;cytosol;nucleus;proteasome;ribosome	catalytic activity	Pf00227, Pf10584	79.3	120.6	114.9	1.52081	1.44893	0.952736	3.642	860.439
K4CXX8	Proteasome subunit alpha type OS=Solanum lycopersicum GN=Solyc10g008010.2 PE=3 SV=1	26.8085	5	34	3	235	25.659	5.48	101245889	LOC101245889; Solyc10g008010.2	10	metabolic process	cytoplasm;nucleus;proteasome	catalytic activity	Pf00227, Pf10584	69	127.6	117.6	1.84928	1.70435	0.92163	5.31	969.667
K4C2W4	Protein disulfide-isomerase OS=Solanum lycopersicum GN=Solyc05g056400.2 PE=3 SV=1	4.53686	3	19	3	529	58.973	5.1		Solyc05g056400.2	5	cellular homeostasis;metabolic process;regulation of biological process;response to stimulus	endoplasmic reticulum;Golgi;membrane;vacuole	catalytic activity	Pf00085, Pf13098, Pf13848, Pf13899, Pf13905	28.2	171.5	121.2	6.08156	4.29787	0.706706	0.292	354.462
K4DA96	Protein disulfide-isomerase OS=Solanum lycopersicum GN=Solyc11g069400.1 PE=3 SV=1	8.10345	4	22	3	580	64.538	4.64	101257830	LOC101257830; Solyc11g069400.1	11	cellular homeostasis;metabolic process;regulation of biological process;response to stimulus	endoplasmic reticulum;membrane;mitochondrion	catalytic activity	Pf00085, Pf13098, Pf13848, Pf13899, Pf13905	76.7	114.4	103.1	1.49153	1.3442	0.901224	0.645	378.08
B5LAW1	Putative aminotransferase OS=Capsicum annuum PE=2 SV=1	15.1709	7	13	3	468	50.992	8.19				metabolic process		catalytic activity	Pf00202	61.4	140.5	116.3	2.28827	1.89414	0.827758	1.276	224.431
Q7XAE2	Putative fructokinase 2 OS=Petunia integrifolia subsp. inflata GN=S2-3.16 PE=3 SV=1	34.1463	9	29	3	328	34.953	5.35				metabolic process		catalytic activity	Pf00294	76.3	102.2	103.4	1.33945	1.35518	1.01174	4.623	992.95
B5LAV6	Putative long-chain acyl-CoA synthetase OS=Capsicum annuum PE=2 SV=1	3.95137	3	3	3	658	73.513	7.25				metabolic process		catalytic activity	Pf00501	142.8	29	38.8	0.203081	0.271709	1.33793	0.212	42.1673
A9YTW5	Putative red chlorophyll catabolite reductase OS=Nicotiana tabacum PE=2 SV=1	19.7452	5	17	3	314	35.111	6.09							Pf06405	60.6	150.5	118.6	2.4835	1.9571	0.78804	2.384	413.225
Q40522	Ras-related protein Rab11D OS=Nicotiana tabacum GN=RAB11D PE=2 SV=1	22.0721	4	13	3	222	24.521	6.8				regulation of biological process;response to stimulus;transport	cytoplasm;membrane;nucleus	nucleotide binding	Pf00025, Pf00071, Pf08477	100.9	89.3	74	0.885035	0.733399	0.828667	0.896	336.475
Q9XEX8	Remorin 1 OS=Solanum lycopersicum GN=rem-1 PE=2 SV=1	21.8274	6	20	3	197	21.837	5.68	543593	rem-1; Solyc03g025850.2	3				Pf03763	226.1	40.5	54	0.179124	0.238832	1.33333	1.976	252.522
Q84KK7	Respiratory burst oxidase homolog OS=Nicotiana benthamiana GN=NbrbohB PE=2 SV=1	4.89883	3	3	3	939	105.98	8.92				metabolic process	membrane	antioxidant activity;catalytic activity;metal ion binding	Pf00036, Pf01794, Pf08022, Pf08030, Pf08414, Pf13499	45.3	103.2	133.6	2.27815	2.94923	1.29457	0.126	132.486
O82529	Ribosomal protein L27a OS=Petunia hybrida PE=2 SV=1	16	3	17	3	150	16.56	10.46				metabolic process	ribosome	structural molecule activity	Pf00828	94.7	109.5	111.5	1.15628	1.1774	1.01826	4.995	523.7
A0A059Q659	Ribosomal protein S8 OS=Hyoscyamus niger GN=rps8 PE=3 SV=1	15.6716	3	8	3	134	15.745	11.03	19591395	rps8		metabolic process	ribosome	structural molecule activity	Pf00410	161.8	58.9	87.2	0.36403	0.538937	1.48048	1.61	149.12
Q40460	Ribulose bisphosphate carboxylase/oxygenase activase 1, chloroplastic OS=Nicotiana tabacum PE=1 SV=1	18.552	6	56	3	442	48.723	8.29				metabolic process		nucleotide binding	Pf00004, Pf06309	86.9	129.6	97.5	1.49137	1.12198	0.752315	2.594	1770.07
Q2EZ42	Ribulose-1,5-bisphosphate carboxylase/oxygenase large subunit (Fragment) OS=Withania somnifera PE=3 SV=1	50.6608	31	1842	3	454	50.453	6.92				metabolic process		catalytic activity;metal ion binding	Pf00016, Pf02788	105.3	51	93.4	0.48433	0.88699	1.83137	5247.07	32468.6
J7FXE4	RNA-binding glycine-rich protein OS=Nicotiana repanda GN=RGP-3 PE=4 SV=1	39.5833	4	52	3	144	15.165	5.27						nucleotide binding	Pf00076, Pf13893, Pf14259	68.8	130.4	110.3	1.89535	1.6032	0.845859	15.681	1826.35
Q38HU0	RWD domain-containing protein OS=Solanum tuberosum PE=2 SV=1	8.26772	3	4	3	254	28.955	4.37						protein binding	Pf05773	75.6	87	109.1	1.15079	1.44312	1.25402	0.778	53.52
M1A0K5	Signal recognition particle 9 kDa protein OS=Solanum tuberosum GN=PGSC0003DMG400004717 PE=3 SV=1	20	3	5	3	105	12.129	9.17		PGSC0003DMG400004717	12	cell organization and biogenesis;regulation of biological process;transport	cytoplasm	RNA binding	Pf05486	60.7	147.9	115.3	2.43657	1.89951	0.779581	5.813	120.89
I6LFS7	Small GTPase Rab5b OS=Nicotiana tabacum GN=Rab5b PE=2 SV=1	29.5	5	11	3	200	21.484	7.24				regulation of biological process;response to stimulus;transport	cytoplasm;nucleus	nucleotide binding	Pf00025, Pf00071, Pf04670, Pf08477	108	72.5	71.4	0.671296	0.661111	0.984828	1.738	284.8
B8R4D5	Subtilisin-like protein (Fragment) OS=Nicotiana benthamiana PE=2 SV=1	20.9424	3	6	3	191	20.819	5.95								96.9	105.5	105.6	1.08875	1.08978	1.00095	1.031	234.057
K4CAN4	Succinyl-CoA ligase subunit beta OS=Solanum lycopersicum GN=LOC543863 PE=3 SV=1	14.7268	5	10	3	421	45.255	6.44	543863	LOC543863; Solyc06g083790.2	6	metabolic process;response to stimulus		catalytic activity;metal ion binding;nucleotide binding	Pf00549, Pf01071, Pf08442, Pf15632	132.9	64.7	58.3	0.486832	0.438676	0.901082	0.693	209.59
P27082	Superoxide dismutase [Cu-Zn] OS=Nicotiana plumbaginifolia GN=SODCC PE=2 SV=2	50	7	335	3	152	15.226	5.87				metabolic process;response to stimulus	cytoplasm	antioxidant activity;catalytic activity;metal ion binding	Pf00080	64	85.8	104.8	1.34062	1.6375	1.22145	192.07	11925.9
M0ZHX5	Superoxide dismutase [Cu-Zn] OS=Solanum tuberosum GN=PGSC0003DMG400000417 PE=3 SV=1	23.8318	4	69	3	214	22.048	6.86	102605869	LOC102605869; PGSC0003DMG400000417	11	metabolic process;response to stimulus		antioxidant activity;catalytic activity;metal ion binding	Pf00080	102.8	111.3	112.5	1.08268	1.09436	1.01078	4.012	1856.57
W0KRH1	Superoxide dismutase OS=Nicotiana tabacum PE=2 SV=1	27.2727	6	71	3	253	28.32	8.68				metabolic process;response to stimulus		antioxidant activity;catalytic activity;metal ion binding	Pf00081, Pf02777	102.6	124.1	97.6	1.20955	0.951267	0.786463	5.105	1587
Q8RVF8	Thioredoxin peroxidase OS=Nicotiana tabacum PE=2 SV=2	32.8413	8	165	3	271	29.818	8.03				metabolic process		antioxidant activity;catalytic activity	Pf00578, Pf08534, Pf10417, Pf13905	116.5	88.9	104	0.76309	0.892704	1.16985	15.681	3696.49
Q8LNZ4	Tobacco nucleolin OS=Nicotiana tabacum GN=NNF1 PE=2 SV=1	6.12903	3	3	3	620	65.076	5.1						nucleotide binding	Pf00076, Pf14259	78.5	130.8	91.8	1.66624	1.16943	0.701835	0.189	71.3167
A0A068BIS3	Tocopherol cyclase OS=Nicotiana tabacum GN=TC PE=2 SV=1	5.65302	3	3	3	513	57.37	6.62				metabolic process		catalytic activity	Pf14249	141	60.2	48.7	0.42695	0.34539	0.80897	0.172	43.81
A0A076KWG3	Transaldolase OS=Nicotiana tabacum PE=2 SV=1	6.77201	3	11	3	443	48.477	6.32				metabolic process	cytoplasm	catalytic activity	Pf00923	52.7	125	126.1	2.37192	2.39279	1.0088	0.334	237.269
A1BQW9	Transketolase (Fragment) OS=Nicotiana attenuata GN=tk PE=2 SV=1	59.6667	14	294	3	300	32.539	6.8							Pf00456, Pf02779	66.9	111.5	156.5	1.66667	2.33931	1.40359	482.293	7058.17
U3SXQ9	Translationally controlled tumor protein OS=Nicotiana benthamiana GN=NbTCTP PE=2 SV=1	46.4286	7	112	3	168	18.938	4.67							Pf00838	67.2	125.6	116.5	1.86905	1.73363	0.927548	49.119	1927.72
A0A0F7CYG6	Translationally controlled tumor protein OS=Nicotiana tabacum PE=2 SV=1	50.5952	7	203	3	168	18.743	4.5							Pf00838	79.5	117.5	113.4	1.47799	1.42642	0.965106	128.155	3409.15
M0ZZE2	Triosephosphate isomerase OS=Solanum tuberosum GN=PGSC0003DMG400004436 PE=3 SV=1	31.348	13	175	3	319	34.032	7.12	102601486	LOC102601486; PGSC0003DMG400004436	10	metabolic process		catalytic activity	Pf00121	127.4	78.2	94.6	0.613815	0.742543	1.20972	137.95	4377.74
Q02214	Trypsin inhibitor 1 OS=Nicotiana sylvestris PE=2 SV=1	29.7872	3	30	3	94	10.458	9.64	104224920	LOC104224920		regulation of biological process;response to stimulus	extracellular;vacuole	enzyme regulator activity	Pf00280	36.7	93.6	39.8	2.55041	1.08447	0.425214	55.234	750.733
B6ZN57	Type 2 proly 4-hydroxylase OS=Nicotiana tabacum GN=NtP4H2.1 PE=2 SV=1	10.5442	3	4	3	294	32.724	6.77				metabolic process		catalytic activity;metal ion binding	Pf01549, Pf03171, Pf13640	54.4	131.1	91.8	2.40993	1.6875	0.700229	0.52	79.46
Q6XP48	UDP-Glc-4-epimerase OS=Solanum tuberosum GN=StUGE51 PE=2 SV=1	13.3903	3	17	3	351	39.19	7.18	102577764	STUGE51; PGSC0003DMG400003054	8	development;metabolic process	cytosol;membrane	catalytic activity;protein binding	Pf00106, Pf01073, Pf01370, Pf02719, Pf04321, Pf07993, Pf08659, Pf13460, Pf13847, Pf13950	69.6	143.2	75.4	2.05747	1.08333	0.526536	1.512	482.461
K4ASG5	Uncharacterized protein OS=Solanum lycopersicum GN=Solyc01g005990.2 PE=4 SV=1	8.80829	3	17	3	193	20.648	7.88	101250539	LOC101250539; Solyc01g005990.2	1		nucleus		Pf00234, Pf14368	114.7	123.6	96.2	1.07759	0.83871	0.778317	2.981	267.58
K4ATB4	Uncharacterized protein OS=Solanum lycopersicum GN=Solyc01g009180.2 PE=3 SV=1	12.6071	10	163	3	817	90.6	7.52	101250617	LOC101250617; Solyc01g009180.2	1	metabolic process	cytosol	catalytic activity;metal ion binding	Pf01717, Pf08267	99.2	93.3	109.1	0.940524	1.0998	1.16935	2.099	4264.48
K4ATD4	Uncharacterized protein OS=Solanum lycopersicum GN=Solyc01g009380.2 PE=4 SV=1	4.77876	3	3	3	565	62.162	6.81	101248033	LOC101248033; Solyc01g009380.2	1	metabolic process	endoplasmic reticulum;Golgi;membrane;mitochondrion;vacuole	catalytic activity		111.3	56.1	67.5	0.504043	0.606469	1.20321	0.28	67.02
K4AXQ9	Uncharacterized protein OS=Solanum lycopersicum GN=Solyc01g080140.2 PE=4 SV=1	9.94152	3	7	3	342	37.19	5.17	101258695	LOC101258695; Solyc01g080140.2	1				Pf08538, Pf12697	93.2	116	102.1	1.24464	1.09549	0.880172	0.896	158.967
K4AXX4	Uncharacterized protein OS=Solanum lycopersicum GN=Solyc01g080810.2 PE=3 SV=1	2.61261	3	4	3	1110	125.537	6.79	101249760	LOC101249760; Solyc01g080810.2	1	metabolic process;regulation of biological process	cytoplasm	catalytic activity;nucleotide binding	Pf00133, Pf06827, Pf08264, Pf09334, Pf13603	147.2	69.8	66.3	0.474185	0.450408	0.949857	0.095	76.3601
K4B2T0	Uncharacterized protein OS=Solanum lycopersicum GN=Solyc01g107130.2 PE=4 SV=1	4.7619	3	8	3	630	69.761	5.63	101266168	LOC101266168; Solyc01g107130.2	1	transport	endosome;vacuole	metal ion binding;protein binding	Pf02225, Pf12662	80.3	127.2	93.9	1.58406	1.16936	0.738208	0.425	174.146
K4B2Y6	Uncharacterized protein OS=Solanum lycopersicum GN=Solyc01g107700.2 PE=4 SV=1	11.8519	3	10	3	270	30.065	6.11	101253534	LOC101253534; Solyc01g107700.2	1	metabolic process;response to stimulus	endoplasmic reticulum;Golgi	catalytic activity	Pf04199	52.9	124.5	118.4	2.3535	2.23819	0.951004	1.276	235.814
K4B302	Uncharacterized protein OS=Solanum lycopersicum GN=Solyc01g107860.2 PE=4 SV=1	11.5702	4	23	3	242	26.164	7.78	101259199	LOC101259199; Solyc01g107860.2	1	cellular homeostasis;regulation of biological process		nucleotide binding	Pf00478, Pf00571	102.6	87.9	87.3	0.856725	0.850877	0.993174	2.728	423.872
K4B3A4	Uncharacterized protein OS=Solanum lycopersicum GN=Solyc01g108890.2 PE=4 SV=1	7.96117	3	4	3	515	55.427	4.78	101254429	LOC101254429; Solyc01g108890.2	1		cytosol			86.9	102.4	100.8	1.17837	1.15995	0.984375	0.241	90.84
K4B3G5	Uncharacterized protein OS=Solanum lycopersicum GN=Solyc01g109520.2 PE=3 SV=1	16.9903	3	8	3	206	22.999	5.19	101263553	LOC101263553; Solyc01g109520.2	1	regulation of biological process;response to stimulus;transport	Golgi;membrane;nucleus	nucleotide binding	Pf00025, Pf00071, Pf01926, Pf04670, Pf08477	138	54.8	51.9	0.397101	0.376087	0.94708	1.054	260.131
K4B3H5	Uncharacterized protein OS=Solanum lycopersicum GN=Solyc01g109620.2 PE=3 SV=1	17.9039	3	4	3	229	26.273	5.43	101257611	LOC101257611; Solyc01g109620.2	1	metabolic process	membrane	catalytic activity	Pf00037, Pf12797, Pf12837, Pf12838, Pf13183, Pf13187, Pf13237, Pf13459, Pf13484, Pf13534, Pf14697	133.2	38.1	41.5	0.286036	0.311562	1.08924	0.719	77.59
K4B7K2	Uncharacterized protein OS=Solanum lycopersicum GN=Solyc02g068700.2 PE=4 SV=1	15.5556	3	10	3	180	19.459	8.97	101259703	LOC101259703; Solyc02g068700.2	2	metabolic process		catalytic activity	Pf01230, Pf11969	73.8	134.3	117.4	1.81978	1.59079	0.874162	0.638	168.24
K4B860	Uncharacterized protein OS=Solanum lycopersicum GN=Solyc02g070790.2 PE=3 SV=1	10.4478	3	3	3	469	49.942	7.21	101267959	LOC101267959; Solyc02g070790.2	2	metabolic process		catalytic activity	Pf00109, Pf02801	131.7	87.7	84.4	0.665907	0.64085	0.962372	0.413	89.6218
K4B985	Uncharacterized protein OS=Solanum lycopersicum GN=Solyc02g078610.2 PE=4 SV=1	6.48464	3	4	3	586	66.84	5.35	101264481	LOC101264481; Solyc02g078610.2	2		nucleus		Pf04037, Pf04046	76	148.8	96.7	1.95789	1.27237	0.649866	0.425	72.01
K4BAK9	Uncharacterized protein OS=Solanum lycopersicum GN=Solyc02g083410.2 PE=3 SV=1	2.48112	3	9	3	927	101.524	8.07		Solyc02g083410.2	2	metabolic process		catalytic activity;nucleotide binding	Pf00069, Pf01593, Pf01636, Pf07714, Pf12260	123.2	90.2	90	0.732143	0.730519	0.997783	0.19	268.426
K4BB24	Uncharacterized protein OS=Solanum lycopersicum GN=Solyc02g085100.2 PE=4 SV=1	8.27815	3	21	3	302	33.297	7.18	101263563	LOC101263563; Solyc02g085100.2	2	metabolic process	extracellular	catalytic activity	Pf01263	104.2	102	89.1	0.978887	0.855086	0.873529	2.652	383.538
K4BD39	Uncharacterized protein OS=Solanum lycopersicum GN=Solyc02g092430.1 PE=3 SV=1	33.5616	7	31	3	146	16.725	10.9	101261182	LOC101261182; Solyc02g092430.1	2	metabolic process	ribosome	structural molecule activity	Pf00467	93.7	117	112.5	1.24867	1.20064	0.961538	70.969	653.637
K4BEW6	Uncharacterized protein OS=Solanum lycopersicum GN=Solyc03g019940.2 PE=3 SV=1	7.35552	4	10	3	571	64.134	6.13	101254276	LOC101254276; Solyc03g019940.2	3	metabolic process	cytoplasm	catalytic activity;nucleotide binding	Pf00152, Pf01336	144.7	81.3	82.1	0.561852	0.567381	1.00984	0.778	180.58
K4BF34	Uncharacterized protein OS=Solanum lycopersicum GN=Solyc03g025610.1 PE=4 SV=1	7.6555	3	11	3	418	44.315	5.43		Solyc03g025610.1	3	metabolic process		catalytic activity	Pf00082	110.1	93.4	101.8	0.84832	0.924614	1.08994	1.336	276.386
K4BH28	Uncharacterized protein OS=Solanum lycopersicum GN=Solyc03g062790.2 PE=4 SV=1	13.2203	4	21	3	295	32.6	7.65	101263678	LOC101263678; Solyc03g062790.2	3			structural molecule activity	Pf04755	134.3	76.5	94.2	0.56962	0.701415	1.23137	1.462	438.602
K4BHZ2	Uncharacterized protein OS=Solanum lycopersicum GN=Solyc03g080160.2 PE=4 SV=1	20.5882	3	4	3	204	22.315	4.55	101252667	LOC101252667; Solyc03g080160.2	3		cytosol		Pf00627, Pf01849	146.7	72.3	72.6	0.492843	0.494888	1.00415	1.31	115.09
K4BJF3	Uncharacterized protein OS=Solanum lycopersicum GN=Solyc03g097360.2 PE=3 SV=1	20.625	4	24	3	160	17.705	9.45	101268264	LOC101268264; Solyc03g097360.2	3				Pf01722	96.5	120	106.2	1.24352	1.10052	0.885	3.924	644.775
K4BK33	Uncharacterized protein OS=Solanum lycopersicum GN=Solyc03g111700.2 PE=4 SV=1	12.7596	3	8	3	337	37.417	6.79	101254186	LOC101254186; Solyc03g111700.2	3	metabolic process		catalytic activity	Pf12706, Pf13483	157.2	52.2	72.3	0.332061	0.459924	1.38506	1.069	164.96
K4BK46	Uncharacterized protein OS=Solanum lycopersicum GN=Solyc03g111850.2 PE=3 SV=1	9.48905	4	12	3	411	45.366	8.02	101250390	LOC101250390; Solyc03g111850.2	3	metabolic process	cytosol	catalytic activity;metal ion binding	Pf00218	125.2	83.1	84.4	0.663738	0.674121	1.01564	0.468	359.197
K4BLP5	Uncharacterized protein OS=Solanum lycopersicum GN=Solyc03g117430.2 PE=4 SV=1	8.49673	3	5	3	459	50.966	6.34	101260218	LOC101260218; Solyc03g117430.2	3		chromosome		Pf00437, Pf02492, Pf07683, Pf12846	138.2	35.9	83	0.259768	0.600579	2.31198	0.407	143.98
K4BLU5	Uncharacterized protein OS=Solanum lycopersicum GN=Solyc03g117940.2 PE=4 SV=1	16.7832	3	3	3	286	32.293	5.52	101248760	LOC101248760; Solyc03g117940.2	3	metabolic process;response to stimulus	cytoplasm;cytosol		Pf12799, Pf13855, Pf14580	115.1	75.8	68.8	0.658558	0.597741	0.907652	0.468	64.2567
K4BML6	Uncharacterized protein OS=Solanum lycopersicum GN=Solyc03g120670.2 PE=3 SV=1	13.4185	3	16	3	313	34.271	6.55	101263391	LOC101263391; Solyc03g120670.2	3	metabolic process		catalytic activity;nucleotide binding	Pf00389, Pf02826	94.4	100	92.3	1.05932	0.977754	0.923	1.154	597.242
K4BMV7	Uncharacterized protein OS=Solanum lycopersicum GN=Solyc03g121580.2 PE=4 SV=1	10.2174	3	7	3	460	50.802	5.36	101267299	LOC101267299; Solyc03g121580.2	3	metabolic process;response to stimulus	cytoplasm;cytosol;nucleus	metal ion binding;protein binding	Pf00400, Pf12265	112.3	90.1	94.4	0.802315	0.840606	1.04772	0.73	123.301
K4BPJ4	Uncharacterized protein OS=Solanum lycopersicum GN=Solyc04g011400.2 PE=4 SV=1	13.1195	3	6	3	343	38.54	6.89	101263507	LOC101263507; Solyc04g011400.2	4	metabolic process		catalytic activity	Pf01073, Pf01370, Pf02719, Pf04321, Pf07993	83.4	115.7	90.1	1.38729	1.08034	0.778738	0.369	185.023
K4BR01	Uncharacterized protein OS=Solanum lycopersicum GN=Solyc04g025560.2 PE=3 SV=1	14.6245	3	5	3	253	29.393	7.81		Solyc04g025560.2	4	regulation of biological process;response to stimulus	membrane;vacuole	nucleotide binding	Pf00025, Pf00071, Pf00503, Pf04670, Pf08477, Pf09439	77	121.5	84.2	1.57792	1.09351	0.693004	1.054	102.236
K4BRF6	Uncharacterized protein OS=Solanum lycopersicum GN=Solyc04g040180.2 PE=4 SV=1	9.09091	3	11	3	264	29.904	5.72	101256176	LOC101256176; Solyc04g040180.2	4	metabolic process;response to stimulus	mitochondrion	catalytic activity	Pf08241, Pf08242, Pf12847, Pf13489, Pf13847	31.3	131	130.8	4.1853	4.17891	0.998473	0.896	288.99
K4BU02	Uncharacterized protein OS=Solanum lycopersicum GN=Solyc04g074640.2 PE=3 SV=1	8.11594	3	15	3	345	37.655	7.78	101263901	LOC101263901; Solyc04g074640.2	4	metabolic process;response to stimulus	cytoplasm;membrane;nucleus	antioxidant activity;catalytic activity	Pf00141	112.5	97.2	87.1	0.864	0.774222	0.896091	0.65	234.68
K4BU77	Uncharacterized protein OS=Solanum lycopersicum GN=Solyc04g076390.2 PE=3 SV=1	4.56942	3	5	3	569	64.514	7.55	101256769	LOC101256769; Solyc04g076390.2	4	cell organization and biogenesis;metabolic process;regulation of biological process	cytoplasm;mitochondrion	catalytic activity;nucleotide binding	Pf00133, Pf01406, Pf01921, Pf09190, Pf09334	93.5	110.4	100.8	1.18075	1.07807	0.913043	0.334	104.252
K4BV02	Uncharacterized protein OS=Solanum lycopersicum GN=Solyc04g079180.2 PE=4 SV=1	12.0833	3	7	3	240	26.616	6.23	101258854	LOC101258854; Solyc04g079180.2	4				Pf14290	113	64.8	69.2	0.573451	0.612389	1.0679	2.455	134.287
K4BVD6	Uncharacterized protein OS=Solanum lycopersicum GN=Solyc04g080570.2 PE=4 SV=1	17.9487	3	3	3	273	29.433	7.3	101266937	LOC101266937; Solyc04g080570.2	4				Pf00132	135.7	48	51.5	0.353721	0.379514	1.07292	0.501	54.0433
K4BVU4	Uncharacterized protein OS=Solanum lycopersicum GN=Solyc04g082170.2 PE=3 SV=1	15.9383	6	9	3	389	42.347	6.89	101252984	LOC101252984; Solyc04g082170.2	4	metabolic process		catalytic activity;metal ion binding	Pf00107, Pf02826, Pf08240	88.7	96.4	90	1.08681	1.01466	0.93361	1.015	181.094
K4BWV5	Uncharacterized protein OS=Solanum lycopersicum GN=Solyc05g007800.2 PE=4 SV=1	14.486	3	9	3	214	23.502	5.85		Solyc05g007800.2	5				Pf04667	65.4	121.7	106.7	1.86086	1.6315	0.876746	1.424	174.858
K4BXD1	Uncharacterized protein OS=Solanum lycopersicum GN=Solyc05g009570.2 PE=4 SV=1	11.976	3	10	3	167	18.811	8.92	101258952	LOC101258952; Solyc05g009570.2	5	cell organization and biogenesis;metabolic process	membrane;ribosome	structural molecule activity	Pf04839	165.8	46	68.9	0.277443	0.415561	1.49783	2.162	103.357
K4BXX0	Uncharacterized protein OS=Solanum lycopersicum GN=Solyc05g012480.2 PE=3 SV=1	5.25328	3	3	3	533	59.544	6.61	101247218	LOC101247218; Solyc05g012480.2	5	metabolic process		catalytic activity;metal ion binding	Pf00675, Pf05193, Pf08367	97.6	69.6	69.8	0.713115	0.715164	1.00287	0.241	35.1867
K4BZ96	Uncharacterized protein OS=Solanum lycopersicum GN=Solyc05g018410.1 PE=4 SV=1	8.33333	3	3	3	300	32.862	8.07		Solyc05g018410.1	5	metabolic process	cytosol;membrane	catalytic activity	Pf00378, Pf13766	70.8	141.8	107.1	2.00282	1.51271	0.755289	0.501	64.6828
K4C2D6	Uncharacterized protein OS=Solanum lycopersicum GN=Solyc05g054580.2 PE=3 SV=1	12.1495	5	32	3	321	34.046	5.16	101261521	LOC101261521; Solyc05g054580.2	5	metabolic process;response to stimulus	cytosol;extracellular;membrane;nucleus;ribosome	metal ion binding;structural molecule activity	Pf00428, Pf00466	119.4	74.2	98.6	0.621441	0.825796	1.32884	4.412	873.377
K4C2X3	Uncharacterized protein OS=Solanum lycopersicum GN=Solyc05g056490.2 PE=4 SV=1	10.3152	3	6	3	349	37.172	5.29		Solyc05g056490.2	5	metabolic process		catalytic activity	Pf00459	89.3	97.6	104.2	1.09295	1.16685	1.06762	0.668	149.3
K4C3Z3	Uncharacterized protein OS=Solanum lycopersicum GN=Solyc06g009630.1 PE=4 SV=1	15.748	3	67	3	127	14.042	5.06	101267611	LOC101267611; Solyc06g009630.1	6	regulation of biological process;response to stimulus			Pf02672	101.7	120	110	1.17994	1.08161	0.916667	1.783	1407.41
K4C5A0	Uncharacterized protein OS=Solanum lycopersicum GN=Solyc06g048530.2 PE=3 SV=1	13.9535	3	6	3	258	28.892	6.07	101247226	LOC101247226; Solyc06g048530.2	6	metabolic process	cytosol	catalytic activity;metal ion binding	Pf00753	89.6	99.1	100.6	1.10603	1.12277	1.01514	0.968	140.327
K4C882	Uncharacterized protein OS=Solanum lycopersicum GN=Solyc06g069090.2 PE=4 SV=1	16.2304	3	8	3	191	22.114	9.8	101268693	LOC101268693; Solyc06g069090.2	6	metabolic process	ribosome	structural molecule activity	Pf01251	96.4	98.1	106	1.01763	1.09959	1.08053	1.31	159.255
K4C8G1	Uncharacterized protein OS=Solanum lycopersicum GN=Solyc06g069890.2 PE=3 SV=1	8.04598	3	8	3	261	30.297	4.34	101252497	LOC101252497; Solyc06g069890.2	6	cell differentiation;cell organization and biogenesis;cell proliferation;metabolic process;response to stimulus	cytoplasm;cytosol;nucleus	protein binding	Pf00956	72.5	124.8	121.4	1.72138	1.67448	0.972756	1.424	198.564
K4CA08	Uncharacterized protein OS=Solanum lycopersicum GN=Solyc06g076480.2 PE=4 SV=1	18.8596	3	49	3	228	24.48	8.06		Solyc06g076480.2	6		membrane		Pf00805, Pf13599	118.5	85.1	101	0.718143	0.852321	1.18684	6.356	1730.92
K4CA68	Uncharacterized protein OS=Solanum lycopersicum GN=Solyc06g082090.2 PE=4 SV=1	25.8398	10	44	3	387	42.67	6.86	101255804	LOC101255804; Solyc06g082090.2	6	cell proliferation;metabolic process;regulation of biological process		catalytic activity	Pf00557	99.6	96.1	99	0.964859	0.993976	1.03018	8.152	1110.6
K4CAE2	Uncharacterized protein OS=Solanum lycopersicum GN=Solyc06g082870.2 PE=3 SV=1	16.6113	5	29	3	301	34.57	9.31	101262823	LOC101262823; Solyc06g082870.2	6	metabolic process	ribosome	RNA binding;structural molecule activity	Pf00861, Pf14204	94.9	108.1	113.5	1.13909	1.196	1.04995	2.384	664.032
K4CAH4	Uncharacterized protein OS=Solanum lycopersicum GN=Solyc06g083190.2 PE=4 SV=1	11.6725	8	16	3	574	63.532	5.31	101253200	LOC101253200; Solyc06g083190.2	6	metabolic process		protein binding	Pf00254, Pf00515, Pf07719, Pf12895, Pf13181, Pf13414, Pf13424, Pf13428, Pf13432, Pf14559	104	98.3	75.5	0.945192	0.725962	0.768057	1.371	338.171
K4CAM4	Uncharacterized protein OS=Solanum lycopersicum GN=Solyc06g083690.2 PE=4 SV=1	25.6831	3	7	3	183	20.316	9.74	101265835	LOC101265835; Solyc06g083690.2	6	cell organization and biogenesis;cellular homeostasis;metabolic process;regulation of biological process		antioxidant activity;catalytic activity	Pf00462	123	83.7	90.1	0.680488	0.73252	1.07646	1.154	202.673
K4CB74	Uncharacterized protein OS=Solanum lycopersicum GN=Solyc07g006030.2 PE=4 SV=1	2.09565	3	4	3	1861	201.072	5.88	101252601	LOC101252601; Solyc07g006030.2	7			protein binding	Pf12807, Pf13374, Pf13414, Pf13424, Pf15044	118	103.3	98.9	0.875424	0.838136	0.957406	0.087	148.02
K4CE78	Uncharacterized protein OS=Solanum lycopersicum GN=Solyc07g042150.2 PE=4 SV=1	11.6505	3	5	3	309	34.641	7.94	101248498	LOC101248498; Solyc07g042150.2	7	metabolic process	mitochondrion		Pf08511	90.3	106.2	91.3	1.17608	1.01107	0.859699	0.438	104.43
K4CFW4	Uncharacterized protein OS=Solanum lycopersicum GN=Solyc07g054190.2 PE=4 SV=1	8.82353	3	4	3	306	33.438	7.24		Solyc07g054190.2	7	metabolic process		catalytic activity	Pf00677	87.9	103.8	112.5	1.18089	1.27986	1.08382	0.668	140.46
K4CGH0	Uncharacterized protein OS=Solanum lycopersicum GN=Solyc07g056370.2 PE=4 SV=1	5.73248	3	14	3	314	34.661	5.05	101246941	LOC101246941; Solyc07g056370.2	7				Pf01576, Pf04111, Pf05622, Pf08614, Pf10211, Pf10473, Pf12128, Pf12718, Pf12795, Pf13851	70.3	121.7	112.2	1.73115	1.59602	0.921939	0.778	247.791
K4CGM9	Uncharacterized protein OS=Solanum lycopersicum GN=Solyc07g061960.2 PE=4 SV=1	10.9155	3	8	3	284	31.393	8.13	101254405	LOC101254405; Solyc07g061960.2	7	metabolic process		catalytic activity	Pf00753	43.5	151.8	114.8	3.48966	2.63908	0.756258	1.929	150.44
K4CHP7	Uncharacterized protein OS=Solanum lycopersicum GN=Solyc07g065690.2 PE=4 SV=1	8.46682	3	3	3	437	48.172	5.85	101248594	LOC101248594; Solyc07g065690.2	7				Pf06999	71.9	112.2	104.7	1.5605	1.45619	0.933155	0.369	30.6478
K4CHX2	Uncharacterized protein OS=Solanum lycopersicum GN=Solyc07g066470.2 PE=3 SV=1	8.49315	3	7	3	365	39.176	6.57	101257684	LOC101257684; Solyc07g066470.2	7	defense response;metabolic process;response to stimulus	extracellular	catalytic activity	Pf01379, Pf03900	191.8	42.2	78.1	0.220021	0.407195	1.85071	0.445	199.03
K4CIG6	Uncharacterized protein OS=Solanum lycopersicum GN=Solyc08g006780.2 PE=4 SV=1	11.9792	3	17	3	192	20.708	8.72	101251012	LOC101251012; Solyc08g006780.2	8		membrane		Pf02575	127.3	71.9	72.9	0.564808	0.572663	1.01391	2.455	430.9
K4CKK5	Uncharacterized protein OS=Solanum lycopersicum GN=Solyc08g048550.2 PE=4 SV=1	13.7255	3	10	3	306	32.695	7.49	101249390	LOC101249390; Solyc08g048550.2	8	metabolic process		catalytic activity	Pf00089, Pf02907, Pf13365	95.9	120.3	103.3	1.25443	1.07716	0.858687	1.069	289.86
K4CKP3	Uncharacterized protein OS=Solanum lycopersicum GN=Solyc08g061000.2 PE=4 SV=1	5.56701	3	6	3	485	54.998	5.64		Solyc08g061000.2	8	metabolic process;response to stimulus	nucleus	catalytic activity;DNA binding;nucleotide binding;RNA binding	Pf00270, Pf00271	114.7	76.8	69.4	0.669573	0.605057	0.903646	0.233	91.6633
K4CLS9	Uncharacterized protein OS=Solanum lycopersicum GN=Solyc08g067030.2 PE=4 SV=1	6.73854	3	4	3	371	40.731	6.65	101262737	LOC101262737; Solyc08g067030.2	8	response to stimulus			Pf04862	140.3	121.5	71.3	0.866001	0.508197	0.586831	0.413	68.7934
K4CNY2	Uncharacterized protein OS=Solanum lycopersicum GN=Solyc08g079820.2 PE=4 SV=1	7.16612	3	7	3	307	33.586	5.41	101256022	LOC101256022; Solyc08g079820.2	8	metabolic process		catalytic activity	Pf00293	92.9	120.8	104.9	1.30032	1.12917	0.868377	1.254	68.5
K4CP41	Uncharacterized protein OS=Solanum lycopersicum GN=Solyc08g080410.2 PE=4 SV=1	6.51085	3	8	3	599	66.432	4.73	101244402	LOC101244402; Solyc08g080410.2	8		cytosol;nucleus	protein binding	Pf00789, Pf14555	73.7	126.6	102.5	1.71777	1.39077	0.809637	0.365	200.87
K4CPI9	Uncharacterized protein OS=Solanum lycopersicum GN=Solyc08g081930.2 PE=4 SV=1	11.5512	3	4	3	303	34.085	6.15	101265664	LOC101265664; Solyc08g081930.2	8	metabolic process		catalytic activity	Pf01263	89.1	103.6	104.7	1.16274	1.17508	1.01062	0.389	89.25
K4CU54	Uncharacterized protein OS=Solanum lycopersicum GN=Solyc09g064240.2 PE=3 SV=1	4.64548	3	5	3	409	43.859	6.33	101268137	LOC101268137; Solyc09g064240.2	9	metabolic process		catalytic activity	Pf00294	103.8	114.3	99.9	1.10116	0.962428	0.874016	0.35	143.5
K4CVC2	Uncharacterized protein OS=Solanum lycopersicum GN=Solyc09g075450.2 PE=3 SV=1	7.89474	3	3	3	494	53.404	7.36	101265278	LOC101265278; Solyc09g075450.2	9	metabolic process		catalytic activity	Pf00206, Pf10415	79	95.3	117.6	1.20633	1.48861	1.234	0.241	43.3133
K4CVK9	Uncharacterized protein OS=Solanum lycopersicum GN=Solyc09g082320.2 PE=4 SV=1	25.4902	6	36	3	204	22.617	7.03	101249580	LOC101249580; Solyc09g082320.2	9	metabolic process	cytosol;extracellular;membrane;vacuole	catalytic activity	Pf00227	74.5	114.2	112.2	1.53289	1.50604	0.982487	9	736.961
K4CWD6	Uncharacterized protein OS=Solanum lycopersicum GN=Solyc09g091100.2 PE=4 SV=1	8.7146	3	4	3	459	51.311	7.62	101248918	LOC101248918; Solyc09g091100.2	9	metabolic process		catalytic activity	Pf04422, Pf04432	153.1	44.2	55	0.2887	0.359242	1.24434	0.292	85.32
K4CX88	Uncharacterized protein OS=Solanum lycopersicum GN=Solyc10g005560.2 PE=4 SV=1	42.2078	7	163	3	154	17.225	6.6	101247072	LOC101247072; Solyc10g005560.2	10			protein binding	Pf00240, Pf11976, Pf13019, Pf13881, Pf14560	110.3	92.5	100.6	0.838622	0.912058	1.08757	13.251	2428.82
K4CXD5	Uncharacterized protein OS=Solanum lycopersicum GN=Solyc10g006030.2 PE=3 SV=1	13.8298	3	10	3	188	20.66	9.04	101248722	LOC101248722; Solyc10g006030.2	10	metabolic process	ribosome	RNA binding;structural molecule activity	Pf00338	139.2	70.7	95.9	0.507902	0.688937	1.35644	1.61	260.04
K4CXU8	Uncharacterized protein OS=Solanum lycopersicum GN=Solyc10g007690.2 PE=4 SV=1	10.989	3	5	3	273	29.261	8.72	101253628	LOC101253628; Solyc10g007690.2	10	metabolic process	membrane	metal ion binding	Pf00504	164	44.8	51.1	0.273171	0.311585	1.14062	0.701	152.8
K4D054	Uncharacterized protein OS=Solanum lycopersicum GN=Solyc10g047950.1 PE=4 SV=1	20.068	5	62	3	294	32.58	5.99	101264469	LOC101264469; Solyc10g047950.1	10	metabolic process	cytoplasm	catalytic activity;metal ion binding	Pf00719	91.6	131.5	105	1.43559	1.14629	0.798479	4.995	1511.67
K4D0R4	Uncharacterized protein OS=Solanum lycopersicum GN=Solyc10g051110.1 PE=4 SV=1	4.63215	3	3	3	734	78.042	5.94	101245302	LOC101245302; Solyc10g051110.1	10		membrane		Pf01073, Pf01370, Pf05368, Pf13460							0.189	61.5233
K4D258	Uncharacterized protein OS=Solanum lycopersicum GN=Solyc10g078150.1 PE=4 SV=1	44.9495	5	28	3	198	21.685	4.53	101260092	LOC101260092; Solyc10g078150.1	10	response to stimulus	cytosol;Golgi;ribosome		Pf00627, Pf01849	138.5	73.5	69	0.530686	0.498195	0.938776	26.826	451.835
K4D2D7	Uncharacterized protein OS=Solanum lycopersicum GN=Solyc10g078960.1 PE=4 SV=1	9.7561	3	5	3	164	18.663	10.58	101257121	LOC101257121; Solyc10g078960.1	10	metabolic process	ribosome	structural molecule activity	Pf01157	87.9	125.8	112.6	1.43117	1.281	0.895072	0.995	88.6642
K4D435	Uncharacterized protein OS=Solanum lycopersicum GN=Solyc10g086010.1 PE=4 SV=1	24.5977	12	85	3	435	47.8	10.29		Solyc10g086010.1	10	metabolic process	ribosome	structural molecule activity	Pf00573, Pf14374	111.7	86.6	101.9	0.775291	0.912265	1.17667	9.89	1961.18
K4D4A4	Uncharacterized protein OS=Solanum lycopersicum GN=Solyc10g086730.1 PE=3 SV=1	8.06846	3	25	3	409	44.934	5.47	101264273	LOC101264273; Solyc10g086730.1	10	metabolic process		catalytic activity	Pf00316	110.1	100.4	99.4	0.911898	0.902816	0.99004	1.783	557.11
K4D6P6	Uncharacterized protein OS=Solanum lycopersicum GN=Solyc11g017430.1 PE=4 SV=1	13	3	4	3	200	22.995	6.35		Solyc11g017430.1	11	regulation of biological process	mitochondrion	DNA binding		138.9	60.9	71.9	0.438445	0.517639	1.18062	0.638	122.263
K4D9A5	Uncharacterized protein OS=Solanum lycopersicum GN=Solyc11g064920.1 PE=4 SV=1	6.55431	3	8	3	534	58.214	5.8	101261880	LOC101261880; Solyc11g064920.1	11	cell communication;metabolic process;response to stimulus	cytoplasm;endoplasmic reticulum;Golgi	catalytic activity	Pf01979, Pf04909, Pf13147, Pf13594	58.3	137.6	107.5	2.36021	1.84391	0.78125	0.374	139.015
K4DA61	Uncharacterized protein OS=Solanum lycopersicum GN=Solyc11g069050.1 PE=4 SV=1	4.46097	3	3	3	538	58.893	8.31	101249706	LOC101249706; Solyc11g069050.1	11	metabolic process		catalytic activity	Pf00501, Pf13193	72.9	110.9	104.5	1.52126	1.43347	0.94229	0.304	53.8563
K4DBR8	Uncharacterized protein OS=Solanum lycopersicum GN=Solyc12g007310.1 PE=4 SV=1	7.47922	3	22	3	361	40.123	7.43	101255271	LOC101255271; Solyc12g007310.1	12	metabolic process;response to stimulus		catalytic activity;metal ion binding	Pf00903, Pf12681, Pf13468, Pf13669	113.7	106.6	105	0.937555	0.923483	0.984991	0.823	774.291
K4DCU3	Uncharacterized protein OS=Solanum lycopersicum GN=Solyc12g014080.1 PE=3 SV=1	35.9447	8	21	3	217	24.275	5.74	101256455	LOC101256455; Solyc12g014080.1	12	regulation of biological process;response to stimulus;transport		nucleotide binding	Pf00025, Pf00071, Pf01926, Pf04670, Pf08477	136.6	49	55	0.358712	0.402635	1.12245	2.875	474.74
K4DH15	Uncharacterized protein OS=Solanum lycopersicum GN=Solyc12g094430.1 PE=3 SV=1	13.5747	3	14	3	221	25.06	7.37	101253468	LOC101253468; Solyc12g094430.1	12	response to stimulus	extracellular;membrane;vacuole	metal ion binding;protein binding	Pf00043, Pf02798, Pf13409, Pf13410, Pf13417, Pf14497	94	115.5	108.5	1.22872	1.15426	0.939394	1.512	113.549
K4DHH6	Uncharacterized protein OS=Solanum lycopersicum GN=Solyc12g097030.1 PE=4 SV=1	9.44444	5	7	3	540	59.19	8.88	101267880	LOC101267880; Solyc12g097030.1	12	metabolic process	mitochondrion	catalytic activity;protein binding	Pf00595, Pf03572, Pf13180, Pf14684	99.9	110.7	99.8	1.10811	0.998999	0.901536	0.377	267.482
K4DHI9	Uncharacterized protein OS=Solanum lycopersicum GN=Solyc12g098150.1 PE=4 SV=1	8.78788	3	5	3	330	36.933	7.77	101265522	LOC101265522; Solyc12g098150.1	12		membrane		Pf00248	113	63.3	55.4	0.560177	0.490265	0.875197	0.585	75.5056
K4DHU7	Uncharacterized protein OS=Solanum lycopersicum GN=Solyc12g099260.1 PE=4 SV=1	16.2829	7	12	3	608	65.688	7.42	101267503	LOC101267503; Solyc12g099260.1	12	metabolic process	membrane	catalytic activity	Pf00285, Pf00549, Pf13607	47.9	125.7	128.8	2.62422	2.68894	1.02466	0.693	477.029
K4DI37	Uncharacterized protein OS=Solanum lycopersicum GN=Solyc12g100160.1 PE=3 SV=1	12.4514	3	14	3	257	28.259	10.15	101248086	LOC101248086; Solyc12g100160.1	12	metabolic process	membrane;ribosome	RNA binding;structural molecule activity	Pf00347	155.1	48.1	82.3	0.310123	0.530625	1.71102	1.976	441.43
M0ZHY6	Uncharacterized protein OS=Solanum tuberosum GN=PGSC0003DMG400000422 PE=4 SV=1	5.65217	3	12	3	460	51.064	7.8		PGSC0003DMG400000422	11	metabolic process		catalytic activity	Pf00450	82.9	146.4	108.7	1.76598	1.31122	0.742486	0.445	184.202
M0ZKA6	Uncharacterized protein OS=Solanum tuberosum GN=PGSC0003DMG400000980 PE=3 SV=1	7.95756	3	4	3	377	42.552	6.47	102596994	LOC102596994; PGSC0003DMG400000980	11	cell communication;metabolic process;response to stimulus	cytosol	catalytic activity	Pf00185, Pf02729	91.3	96	128.6	1.05148	1.40854	1.33958	0.389	109.54
M0ZKQ9	Uncharacterized protein OS=Solanum tuberosum GN=PGSC0003DMG400001100 PE=4 SV=1	11.5819	3	6	3	354	37.067	6.9		PGSC0003DMG400001100	12			metal ion binding;nucleotide binding	Pf00766, Pf01012	100.5	60.2	67.1	0.599005	0.667662	1.11462	0.688	242.568
M0ZS84	Uncharacterized protein OS=Solanum tuberosum GN=PGSC0003DMG400002694 PE=4 SV=1	35.3535	3	8	3	99	10.644	5.21	102580345	LOC102580345; PGSC0003DMG400002694	9	metabolic process		RNA binding	Pf01423	112.6	87.2	103.5	0.774423	0.919183	1.18693	9	95.5501
M0ZU86	Uncharacterized protein OS=Solanum tuberosum GN=PGSC0003DMG400003159 PE=4 SV=1	18.3453	4	13	3	278	29.478	5.77	102583725	LOC102583725; PGSC0003DMG400003159	3			nucleotide binding	Pf00076, Pf13893, Pf14259	73.4	123.9	106.5	1.68801	1.45095	0.859564	1.783	450.668
M0ZY56	Uncharacterized protein OS=Solanum tuberosum GN=PGSC0003DMG400004101 PE=3 SV=1	4.62185	3	4	3	952	104.947	6.74		PGSC0003DMG400004101	7	metabolic process;transport	membrane	catalytic activity;metal ion binding;nucleotide binding;transporter activity	Pf00122, Pf00690, Pf00702, Pf12710, Pf13246	78.4	72.7	119.3	0.927296	1.52168	1.64099	0.139	42.89
M1A2M6	Uncharacterized protein OS=Solanum tuberosum GN=PGSC0003DMG400005189 PE=4 SV=1	3.81282	3	3	3	577	64.353	4.75	102597890	LOC102597890; PGSC0003DMG400005189	6	cell growth;cell organization and biogenesis;transport	extracellular;Golgi;membrane;vacuole	protein binding	Pf00650, Pf03765, Pf13716	101	135.6	73.6	1.34257	0.728713	0.542773	0.194	37.09
M1A379	Uncharacterized protein OS=Solanum tuberosum GN=PGSC0003DMG400005353 PE=3 SV=1	3.0303	3	6	3	924	105.558	6.04		PGSC0003DMG400005353	4	cell growth;cell organization and biogenesis;defense response;metabolic process;response to stimulus	endoplasmic reticulum	catalytic activity	Pf01055, Pf13802	91	95.2	96.7	1.04615	1.06264	1.01576	0.175	39.86
M1AJ12	Uncharacterized protein OS=Solanum tuberosum GN=PGSC0003DMG400009217 PE=4 SV=1	7.36041	3	4	3	394	43.589	6.47	102591464	LOC102591464; PGSC0003DMG400009217	11	metabolic process		catalytic activity	Pf01959	111.2	78.4	95.6	0.705036	0.859712	1.21939	0.304	63.5771
M1AXW6	Uncharacterized protein OS=Solanum tuberosum GN=PGSC0003DMG400012566 PE=4 SV=1	3.9749	3	3	3	956	102.799	4.04		PGSC0003DMG400012566	1	metabolic process		catalytic activity	Pf00481, Pf07228, Pf13672	123.9	80.2	93.9	0.647296	0.757869	1.17082	0.225	81.5967
M1B4H5	Uncharacterized protein OS=Solanum tuberosum GN=PGSC0003DMG400014232 PE=3 SV=1	8.68762	5	19	3	541	61.277	4.83	102601553	LOC102601553; PGSC0003DMG400014232	3	metabolic process	endoplasmic reticulum;membrane;mitochondrion;vacuole	metal ion binding;protein binding	Pf00262	60.8	98.7	121.2	1.62336	1.99342	1.22796	0.433	220.784
M1B9Y5	Uncharacterized protein OS=Solanum tuberosum GN=PGSC0003DMG400015666 PE=4 SV=1	5.40958	3	3	3	647	69.6	6.98	102578620	LOC102578620; PGSC0003DMG400015666	11	metabolic process;response to stimulus	membrane	catalytic activity;nucleotide binding;protein binding	Pf00069, Pf07714, Pf08263, Pf13855	133.8	80.3	80.2	0.600149	0.599402	0.998755	0.199	71.2067
M1BBI1	Uncharacterized protein OS=Solanum tuberosum GN=PGSC0003DMG400016108 PE=4 SV=1	7.20339	3	10	3	236	25.86	6.4	102590056	LOC102590056; PGSC0003DMG400016108	10	metabolic process		catalytic activity	Pf01738, Pf12695, Pf12697	84.9	107.1	114.2	1.26148	1.34511	1.06629	0.501	322.363
M1BE70	Uncharacterized protein OS=Solanum tuberosum GN=PGSC0003DMG400016746 PE=4 SV=1	12.6394	3	17	3	269	28.744	7.39	102599674	LOC102599674; PGSC0003DMG400016746	3	metabolic process	cytosol	catalytic activity	Pf00106, Pf01370, Pf02456, Pf07993, Pf08659, Pf13460, Pf13561	73.4	119.5	125.1	1.62807	1.70436	1.04686	1.254	297.133
M1BEH2	Uncharacterized protein OS=Solanum tuberosum GN=PGSC0003DMG400016830 PE=4 SV=1	6.45161	3	6	3	434	48.331	5.21		PGSC0003DMG400016830	10				Pf01937	82.1	127.4	95.7	1.55177	1.16565	0.751177	0.445	220.133
M1BP45	Uncharacterized protein OS=Solanum tuberosum GN=PGSC0003DMG400019289 PE=4 SV=1	10.0223	3	4	3	449	47.968	6.77	102587335	LOC102587335; PGSC0003DMG400019289	7	metabolic process		catalytic activity	Pf00266, Pf01041, Pf01053, Pf01212, Pf06838	116.8	100	93.3	0.856164	0.798801	0.933	0.292	133.56
M1BR10	Uncharacterized protein OS=Solanum tuberosum GN=PGSC0003DMG400019764 PE=3 SV=1	12.3377	3	5	3	154	17.346	10.18		PGSC0003DMG400019764	11	metabolic process	ribosome	structural molecule activity	Pf00935	106.3	96.9	93.6	0.911571	0.880527	0.965944	1.154	35.11
M1BTN7	Uncharacterized protein OS=Solanum tuberosum GN=PGSC0003DMG400020422 PE=3 SV=1	28.8401	27	130	3	957	109.096	6.15		PGSC0003DMG400020422	7	metabolic process	cytosol;extracellular;membrane	catalytic activity	Pf00311	86.4	101.9	110.7	1.1794	1.28125	1.08636	3.642	2818.89
M1BTP6	Uncharacterized protein OS=Solanum tuberosum GN=PGSC0003DMG400020425 PE=3 SV=1	23.7548	7	41	3	261	29.455	4.82	102596432	LOC102596432; PGSC0003DMG400020425	7			protein binding	Pf00244	129	43.4	64.3	0.336434	0.49845	1.48157	3.833	920.312
M1BZW7	Uncharacterized protein OS=Solanum tuberosum GN=PGSC0003DMG400022088 PE=4 SV=1	24.1565	14	291	3	741	79.928	6.35		PGSC0003DMG400022088	10	metabolic process;response to stimulus		catalytic activity	Pf00456, Pf02779, Pf02780	87.9	64.5	103.7	0.733788	1.17975	1.60775	9	7235.22
M1C2T1	Uncharacterized protein OS=Solanum tuberosum GN=PGSC0003DMG400022731 PE=4 SV=1	14.0625	3	10	3	320	35.969	5.47	102598666	LOC102598666; PGSC0003DMG400022731	8	metabolic process		catalytic activity;protein binding		151.9	65.2	72.4	0.42923	0.476629	1.11043	1.154	249.401
M1C340	Uncharacterized protein OS=Solanum tuberosum GN=PGSC0003DMG400022796 PE=3 SV=1	12.9199	3	16	3	387	41.985	7.43	102596301	LOC102596301; PGSC0003DMG400022796	1	metabolic process	cytoplasm;mitochondrion	catalytic activity;nucleotide binding;protein binding	Pf01118, Pf02774	104.7	104.9	95.6	1.00191	0.913085	0.911344	1.637	529.175
M1C888	Uncharacterized protein OS=Solanum tuberosum GN=PGSC0003DMG400024095 PE=4 SV=1	11.7647	3	8	3	170	18.901	8.31	102584454	LOC102584454; PGSC0003DMG400024095	4	cellular homeostasis;metabolic process;regulation of biological process;response to stimulus		catalytic activity;enzyme regulator activity	Pf00085, Pf13098, Pf13848, Pf13899, Pf13905	134.7	50.9	77.9	0.377877	0.578322	1.53045	3.217	101.581
M1C9L0	Uncharacterized protein OS=Solanum tuberosum GN=PGSC0003DMG400024459 PE=4 SV=1	4.94905	3	12	3	687	74.551	5.14	102598136	LOC102598136; PGSC0003DMG400024459	3	metabolic process		catalytic activity	Pf07995	41.5	81.6	124.3	1.96627	2.99518	1.52328	0.484	297.253
M1CFN8	Uncharacterized protein OS=Solanum tuberosum GN=PGSC0003DMG400025849 PE=4 SV=1	13.4573	11	54	3	914	99.417	5.33		PGSC0003DMG400025849	1	metabolic process		catalytic activity	Pf02769, Pf13507	90.9	121.3	104.4	1.33443	1.14851	0.860676	1.358	1479.82
M1CGN3	Uncharacterized protein OS=Solanum tuberosum GN=PGSC0003DMG400026078 PE=3 SV=1	19.9074	3	7	3	216	23.855	9.73	102595243	LOC102595243; PGSC0003DMG400026078	6	cell organization and biogenesis;metabolic process;response to stimulus	nucleus;ribosome	RNA binding;structural molecule activity	Pf00829	150.9	68.9	101.7	0.456594	0.673956	1.47605	1.154	153.617
M1CHQ5	Uncharacterized protein OS=Solanum tuberosum GN=PGSC0003DMG400026328 PE=4 SV=1	13.8235	3	3	3	340	37.376	7.42	102605588	LOC102605588; PGSC0003DMG400026328	3			protein binding	Pf00400	91.5	98.7	100.3	1.07869	1.09617	1.01621	0.413	85.1982
M1CIE4	Uncharacterized protein OS=Solanum tuberosum GN=PGSC0003DMG400026478 PE=3 SV=1	20.625	4	39	3	160	17.615	9.48	102594211	LOC102594211; PGSC0003DMG400026478	3				Pf01722	87	130	107.9	1.49425	1.24023	0.83	6.017	870.541
M1CPK1	Uncharacterized protein OS=Solanum tuberosum GN=PGSC0003DMG400028009 PE=4 SV=1	17.2222	3	10	3	180	19.295	5.01	102593653	LOC102593653; PGSC0003DMG400028009	9		membrane			95.3	116.3	101.6	1.22036	1.06611	0.873603	1.31	254.536
M1CSB5	Uncharacterized protein OS=Solanum tuberosum GN=PGSC0003DMG400028592 PE=4 SV=1	9.03614	3	6	3	332	36.125	6.04		PGSC0003DMG400028592	1	metabolic process		catalytic activity;nucleotide binding	Pf01113	126.8	76.5	89.4	0.603312	0.705047	1.16863	0.833	258.77
M1CX99	Uncharacterized protein OS=Solanum tuberosum GN=PGSC0003DMG400029836 PE=3 SV=1	5.9448	3	12	3	471	50.946	6.13		PGSC0003DMG400029836	10	metabolic process		catalytic activity	Pf00155, Pf00266, Pf01053, Pf01212, Pf02347	106.6	104.4	107	0.979362	1.00375	1.0249	0.468	172.624
M1D130	Uncharacterized protein OS=Solanum tuberosum GN=PGSC0003DMG400030738 PE=3 SV=1	13.468	3	5	3	297	32.381	8	102592388	LOC102592388; PGSC0003DMG400030738	7	metabolic process		catalytic activity	Pf00160	119.9	82	77.3	0.683903	0.644704	0.942683	0.624	80.76
M1D7X5	Uncharacterized protein OS=Solanum tuberosum GN=PGSC0003DMG400034309 PE=4 SV=1	12.1827	3	9	3	197	20.415	5.95	102589672	LOC102589672; PGSC0003DMG400034309	5	transport			Pf00234, Pf14368	109.5	111.1	88.1	1.01461	0.804566	0.792979	0.931	187.588
M1DBW2	Uncharacterized protein OS=Solanum tuberosum GN=PGSC0003DMG400036067 PE=3 SV=1	5.36723	3	5	3	354	38.404	11.41		PGSC0003DMG400036067	1	metabolic process	ribosome	structural molecule activity	Pf00164	205.9	29.7	76.6	0.144245	0.372025	2.57912	0.688	105.19
M1DFM6	Uncharacterized protein OS=Solanum tuberosum GN=PGSC0003DMG400037860 PE=3 SV=1	8.45411	3	4	3	414	46.941	5.58	102595924	LOC102595924; PGSC0003DMG400037860	5	metabolic process		catalytic activity;nucleotide binding	Pf00270, Pf00271	144.8	54	53.4	0.372928	0.368785	0.988889	0.304	65.0275
M1ARC8	Uncharacterized protein OS=Solanum tuberosum GN=PGSC0003DMG401011006 PE=3 SV=1	5.96421	3	5	3	503	56.829	5.5		PGSC0003DMG401011006	10		cytosol		Pf01237	91.9	68.9	71.9	0.749728	0.782372	1.04354	0.557	101.64
M1CUU9	Uncharacterized protein OS=Solanum tuberosum GN=PGSC0003DMG401029274 PE=4 SV=1	8.56102	3	4	3	549	62.817	8.56	102605482	LOC102605482; PGSC0003DMG401029274	12	metabolic process;transport		catalytic activity;metal ion binding	Pf00355, Pf08417	113.8	72.9	67.9	0.640598	0.596661	0.931413	0.311	122.56
M0ZSD6	Uncharacterized protein OS=Solanum tuberosum GN=PGSC0003DMG402002721 PE=3 SV=1	40.0901	15	404	3	444	47.815	5.81	102595943	LOC102595943; PGSC0003DMG402002721	9	metabolic process		catalytic activity;metal ion binding	Pf00113, Pf03952	84.2	110.5	106.8	1.31235	1.26841	0.966516	53.117	12148.8
M1AD38	Uncharacterized protein OS=Solanum tuberosum GN=PGSC0003DMG402007810 PE=3 SV=1	36.4055	8	18	3	217	24.072	5.71	102603516	LOC102603516; PGSC0003DMG402007810	12	regulation of biological process;response to stimulus;transport	cytosol	nucleotide binding	Pf00025, Pf00071, Pf01926, Pf04670, Pf05783, Pf08477	127.6	48.1	63.7	0.376959	0.499216	1.32432	3.217	471.066
M1CRT2	Uncharacterized protein OS=Solanum tuberosum GN=PGSC0003DMG402028489 PE=4 SV=1	8.92388	3	3	3	381	42.745	5.9	102581561	LOC102581561; PGSC0003DMG402028489	6	cell organization and biogenesis			Pf09353	197.2	40.4	49.9	0.204868	0.253043	1.23515	0.318	61.8867
M1CBL3	Uncharacterized protein OS=Solanum tuberosum GN=PGSC0003DMG403024882 PE=3 SV=1	22.7723	4	12	3	202	22.519	5.48	102584742	LOC102584742; PGSC0003DMG403024882	1	regulation of biological process;response to stimulus;transport	membrane	nucleotide binding;protein binding	Pf00025, Pf00071, Pf01926, Pf04670, Pf08477	94.3	87.2	78.1	0.924708	0.828208	0.895642	1.154	393.18
O82702	V-type proton ATPase subunit G 1 OS=Nicotiana tabacum GN=VATG1 PE=3 SV=1	35.4545	5	40	3	110	12.339	6.32				transport		catalytic activity;transporter activity	Pf03179	116.7	44.6	51.5	0.382177	0.441302	1.15471	70.969	843.265
A0A077DBL0	Xyloglucan-specific fungal endoglucanase inhibitor protein OS=Nicotiana tabacum PE=2 SV=1	7.32265	3	8	3	437	46.669	7.99				metabolic process		catalytic activity	Pf14541, Pf14543	82.3	123.7	64.1	1.50304	0.778858	0.518189	0.52	310.515
A0A067YEL0	Zeta-carotene desaturase OS=Nicotiana tabacum GN=ZDS PE=2 SV=1	6.29252	3	6	3	588	64.702	8.12				metabolic process		catalytic activity	Pf00890, Pf01266, Pf01593, Pf03486, Pf03721, Pf06100, Pf07992, Pf13450, Pf13454	185.7	57.8	56.5	0.311255	0.304254	0.977509	0.487	151.781
O24109	1-aminocyclopropane-1-carboxylic acid oxidase OS=Nicotiana glutinosa GN=NGACO2 PE=2 SV=1	26.5823	10	41	2	316	35.698	5.39				metabolic process		catalytic activity;metal ion binding	Pf03171, Pf14226	80.8	133.1	84	1.64728	1.0396	0.631104	6.943	854.54
V9TI00	12-oxophytodienoate reductase 3 OS=Nicotiana tabacum GN=opr3 PE=2 SV=1	11.1392	3	11	2	395	43.444	7.09				metabolic process		catalytic activity;nucleotide binding	Pf00724	87.2	89.3	117.3	1.02408	1.34518	1.31355	0.492	259.47
O49996	14-3-3-like protein D OS=Nicotiana tabacum PE=2 SV=1	22.49	6	16	2	249	28.239	4.82						protein binding	Pf00244	134.7	77.2	66.8	0.573125	0.495917	0.865285	1.976	302.06
K4CPF3	2-C-methyl-D-erythritol 2,4-cyclodiphosphate synthase OS=Solanum lycopersicum GN=Solyc08g081570.2 PE=3 SV=1	9.76562	2	7	2	256	27.651	8.28	101246365	LOC101246365; Solyc08g081570.2	8	metabolic process		catalytic activity	Pf02542	117.5	97.3	81	0.828085	0.689362	0.832477	1.031	248.907
Q84LQ7	29 kDa chitinase-like thermal hysteresis protein (Fragment) OS=Solanum dulcamara PE=2 SV=1	13.1086	2	30	2	267	28.827	8.53				metabolic process		catalytic activity	Pf00182	26.2	192.7	72.2	7.35496	2.75573	0.374676	0.701	354.025
C8YNG7	3-ketoacyl CoA thiolase 2 OS=Petunia hybrida PE=2 SV=1	6.91145	2	2	2	463	48.964	7.99				metabolic process		catalytic activity	Pf00108, Pf02803, Pf08541	85.2	111.9	73.6	1.31338	0.86385	0.65773	0.212	68.24
A0A0C5B0U0	30S ribosomal protein S18, chloroplastic OS=Capsicum lycianthoides GN=rps18 PE=3 SV=1	16.8317	2	2	2	101	12.015	11.91	23630357	rps18		metabolic process	ribosome	RNA binding;structural molecule activity	Pf01084	147.2	73.1	93.9	0.496603	0.637908	1.28454	1.154	45.9664
M1ASF0	4-hydroxy-4-methyl-2-oxoglutarate aldolase OS=Solanum tuberosum GN=PGSC0003DMG400011236 PE=3 SV=1	25.9036	4	28	2	166	17.66	5.33	102584527	LOC102584527; PGSC0003DMG400011236	10	regulation of biological process		catalytic activity;enzyme regulator activity;metal ion binding	Pf03737	97.3	103.9	115.3	1.06783	1.18499	1.10972	5.813	787.243
K4BIA5	40S ribosomal protein S12 OS=Solanum lycopersicum GN=Solyc03g083290.2 PE=3 SV=1	19.1489	2	3	2	141	14.951	6.01	101256955	LOC101256955; Solyc03g083290.2	3	metabolic process	ribosome	structural molecule activity	Pf01248	95.7	100.6	78.5	1.0512	0.820272	0.780318	0.668	40.63
K4AT06	40S ribosomal protein S27 OS=Solanum lycopersicum GN=Solyc01g008080.2 PE=3 SV=1	24.4186	2	3	2	86	9.615	8.75	101247845; 101247355	LOC101247845; LOC101247355; Solyc01g008080.2; Solyc01g008090.2	1	metabolic process	ribosome	metal ion binding;structural molecule activity	Pf01667	83.3	127.1	84.3	1.52581	1.012	0.663257	2.162	65.0167
K4BJK7	40S ribosomal protein S3a OS=Solanum lycopersicum GN=Solyc03g097900.2 PE=3 SV=1	31.0345	6	17	2	261	29.69	9.74	101260518	LOC101260518; Solyc03g097900.2	3	metabolic process	cytoplasm;cytosol;membrane;ribosome	structural molecule activity	Pf01015	89.9	106.5	118.6	1.18465	1.31924	1.11362	2.793	239.062
M1B8D3	40S ribosomal protein SA OS=Solanum tuberosum GN=PGSC0003DMG400015271 PE=3 SV=1	9.33333	2	9	2	300	32.5	5.25		PGSC0003DMG400015271	3	cell organization and biogenesis;metabolic process;response to stimulus	cytoplasm;cytosol;membrane;nucleus;ribosome	structural molecule activity	Pf00318	82.8	133	92	1.60628	1.11111	0.691729	0.719	270.064
Q84LF0	5-epi-aristolochene synthase 2 OS=Nicotiana attenuata PE=1 SV=1	6.0219	3	4	2	548	63.15	5.07				defense response;metabolic process;response to stimulus	cytoplasm	catalytic activity;metal ion binding	Pf01397, Pf03936	72.7	113.5	120.8	1.56121	1.66162	1.06432	0.225	79.71
A0A0C5D5B2	50S ribosomal protein L22, chloroplastic OS=Saracha punctata GN=rpl22 PE=3 SV=1	7.05128	2	7	2	156	17.908	9.74	23764355	rpl22		metabolic process	ribosome	RNA binding;structural molecule activity	Pf00237	140.9	73.6	87.9	0.522356	0.623847	1.19429	0.585	154.066
K4DHD2	6,7-dimethyl-8-ribityllumazine synthase OS=Solanum lycopersicum GN=Solyc12g096590.1 PE=3 SV=1	4.74138	2	4	2	232	24.855	7.74	101251867	LOC101251867; Solyc12g096590.1	12	metabolic process;regulation of biological process;response to stimulus		catalytic activity	Pf00885	83.5	138.3	112.6	1.65629	1.3485	0.814172	0.701	95.36
Q07760	60S ribosomal protein L23 OS=Nicotiana tabacum GN=RPL23 PE=2 SV=1	44.2857	5	12	2	140	14.979	10.48				metabolic process	ribosome	structural molecule activity	Pf00238	84.6	57	80.2	0.673759	0.947991	1.40702	2.981	398.463
Q672Q9	Acyl carrier protein OS=Solanum lycopersicum GN=LOC543929 PE=2 SV=1	7.5188	2	40	2	133	14.163	4.98	543929	LOC543929; Solyc03g118410.2	3	metabolic process			Pf00550, Pf14573	118.5	99.5	101.2	0.839662	0.854008	1.01709	2.594	704.332
H1AD87	ADP-ribosylation factor-like 8a OS=Nicotiana tabacum GN=NtARL8a PE=2 SV=1	10.3261	2	2	2	184	20.502	8.43				regulation of biological process;response to stimulus	cytoplasm;nucleus	nucleotide binding	Pf00025, Pf00071, Pf00503, Pf01926, Pf04670, Pf08477, Pf09439	159.7	42.8	52.7	0.268003	0.329994	1.23131	0.52	84.05
K7XKT7	Alpha-1,4-glucan-protein synthase OS=Solanum tuberosum GN=PGSC0003DMG400028361 PE=2 SV=1	14.0884	6	19	2	362	41.12	6.44	102589020	LOC102589020; PGSC0003DMG400028361	5	development;metabolic process;response to stimulus	cytosol;membrane;ribosome	catalytic activity	Pf03214	68.7	59.6	81.5	0.86754	1.18632	1.36745	1.61	434.872
M0ZV96	Alpha-galactosidase OS=Solanum tuberosum GN=PGSC0003DMG400003465 PE=3 SV=1	6.75676	2	6	2	444	49.501	5.92		PGSC0003DMG400003465	6	metabolic process	vacuole	catalytic activity	Pf02065, Pf10566	93.5	109.5	91.7	1.17112	0.980749	0.837443	0.318	169.557
M0ZVS8	Alpha-mannosidase OS=Solanum tuberosum GN=PGSC0003DMG400003576 PE=3 SV=1	3.37302	3	3	2	1008	113.306	6.34	102595492	LOC102595492; PGSC0003DMG400003576	2	metabolic process		catalytic activity;metal ion binding	Pf01074, Pf07748, Pf09261	72.6	118.5	118.7	1.63223	1.63499	1.00169	0.139	71.3533
A0A060Q2U8	Aminoacylase-1 OS=Nicotiana benthamiana GN=NbACY PE=2 SV=1	29.2035	9	34	2	452	50.024	6.48				metabolic process	cytoplasm	catalytic activity;metal ion binding	Pf01546	54	133.6	120.8	2.47407	2.23704	0.904192	2.687	545.928
A0A0A8J4Z6	Aminoacylase-1 OS=Nicotiana tabacum GN=NtACY PE=2 SV=1	29.646	9	66	2	452	50.051	6.35				metabolic process	cytoplasm	catalytic activity;metal ion binding	Pf01546, Pf07687	86.2	120.8	104	1.40139	1.2065	0.860927	3.642	1303.93
A0A0A7EAV4	Ankyrin repeat domain containing protein 2 OS=Nicotiana benthamiana GN=ANKr_2 PE=2 SV=1	51.4286	12	313	2	350	37.279	4.49						protein binding	Pf00023, Pf12796, Pf13606, Pf13637, Pf13857	102.5	106.9	105.9	1.04293	1.03317	0.990645	388.86	6030.98
D2Y4N3	Ankyrin repeat-containing protein OS=Nicotiana tabacum PE=2 SV=1	38.5714	9	281	2	350	37.344	4.54						protein binding	Pf00023, Pf12796, Pf13606, Pf13637, Pf13857	133.1	77.9	101.7	0.585274	0.764087	1.30552	110.034	4765.06
Q43716	Anthocyanidin 3-O-glucosyltransferase OS=Petunia hybrida GN=RT PE=2 SV=1	4.22833	2	2	2	473	52.372	6.61				metabolic process		catalytic activity	Pf00201	103.7	103.1	87.4	0.994214	0.842816	0.847721	0.186	29.67
B2ZFD7	AOC OS=Petunia hybrida PE=2 SV=1	13.1687	3	8	2	243	26.408	8.97				metabolic process		catalytic activity	Pf06351	100.6	116.3	99.2	1.15606	0.986083	0.852966	0.778	175.755
A0A0A8WH07	Aquaporin PIP2 7a OS=Nicotiana tabacum PE=2 SV=1	5.6338	2	6	2	284	30.464	8.92				transport	membrane	transporter activity	Pf00230	113.2	62	67.7	0.547703	0.598057	1.09194	0.701	150.79
A0A0A8WK76	Aquaporin PIP2 9b OS=Nicotiana tabacum PE=2 SV=1	5.92334	2	10	2	287	30.715	7.49				transport	membrane	transporter activity	Pf00230	200.2	21.3	27.4	0.106394	0.136863	1.28638	1.031	251.018
Q944F3	Arabinosidase ARA-1 OS=Solanum lycopersicum GN=ARF1 PE=2 SV=1	2.96736	2	2	2	674	74.185	5.53	543517	ARF1; Solyc10g081120.1	10	metabolic process		catalytic activity	Pf02018, Pf06964	109.4	109.8	95.1	1.00366	0.869287	0.86612	0.16	31.6
Q5UNS2	Arginase 1 OS=Solanum lycopersicum GN=ARG1 PE=2 SV=1	7.10059	2	6	2	338	37.026	6.39	543944	ARG1; Solyc01g091160.2	1	defense response;metabolic process;response to stimulus	mitochondrion	catalytic activity;metal ion binding	Pf00491	65.7	165.2	102.2	2.51446	1.55556	0.618644	0.389	216.04
K4CR69	Arginine biosynthesis bifunctional protein ArgJ, chloroplastic OS=Solanum lycopersicum GN=Solyc09g010420.2 PE=3 SV=1	5.10638	2	6	2	470	49.125	6.14	101265059	LOC101265059; Solyc09g010420.2	9	metabolic process		catalytic activity	Pf01960	100.6	121.5	103	1.20775	1.02386	0.847737	0.318	146.357
W8R6U0	Argininosuccinate synthase OS=Nicotiana tabacum PE=2 SV=1	3.46232	2	2	2	491	53.878	6.57				metabolic process		catalytic activity;nucleotide binding	Pf00764	116.2	84.3	83.3	0.725473	0.716867	0.988138	0.145	67.3029
F8WQS3	Ascorbate peroxidase (Fragment) OS=Nicotiana benthamiana GN=APX PE=2 SV=1	34.8958	5	42	2	192	21.06	5.02				metabolic process;response to stimulus		antioxidant activity;catalytic activity	Pf00141	143.7	45.5	62.6	0.316632	0.43563	1.37582	7.483	754.107
Q75U98	Aspartate aminotransferase (Fragment) OS=Nicotiana tabacum PE=2 SV=1	24.2291	5	15	2	227	25.379	8.34				metabolic process		catalytic activity	Pf00155	80.8	137.4	106.8	1.7005	1.32178	0.777293	2.652	292.861
M0ZSK0	ATP-dependent Clp protease proteolytic subunit OS=Solanum tuberosum GN=PGSC0003DMG400002768 PE=3 SV=1	4.60993	2	2	2	564	61.525	8.92		PGSC0003DMG400002768	1	metabolic process		catalytic activity	Pf00574, Pf00657	77	139.9	85.7	1.81688	1.11299	0.61258	0.145	55.05
Q9SYX6	Beta-1,3-glucanase OS=Nicotiana tabacum GN=GGL1 PE=3 SV=1	8.26211	3	74	2	351	38.879	7.37				metabolic process		catalytic activity	Pf00332	45.2	135.6	126	3	2.78761	0.929204	0.468	1031.51
D3TI69	Beta-hexosaminidase OS=Solanum lycopersicum GN=LOC100529103 PE=2 SV=1	8	2	3	2	575	63.983	5.92	100529103	LOC100529103; Solyc01g081610.2	1	metabolic process		catalytic activity	Pf00728, Pf14845	74.5	173	95.5	2.32215	1.28188	0.552023	0.194	40.81
E6Y3A5	Beta-hexosaminidase OS=Solanum lycopersicum PE=2 SV=1	3.26087	2	5	2	552	62.58	6.1	100529104	LOC100529104	5	metabolic process	cytosol	catalytic activity	Pf00728, Pf02838, Pf14845	89.2	113.5	114.8	1.27242	1.287	1.01145	0.259	110.97
Q40401	Calreticulin OS=Nicotiana plumbaginifolia GN=CAL1 PE=2 SV=1	17.3077	9	42	2	416	47.452	4.61				metabolic process	endoplasmic reticulum;organelle lumen	metal ion binding;protein binding	Pf00262	97.6	126.2	98.8	1.29303	1.0123	0.782884	2.162	882.377
A0A077EPD5	Carotenoid isomerase OS=Nicotiana tabacum GN=CRTISO PE=2 SV=1	11.3835	5	13	2	571	61.378	7.88				metabolic process		catalytic activity	Pf01593, Pf13450	118.4	93.3	91.3	0.788007	0.771115	0.978564	1.291	408.911
A0A075EYQ1	Chloroplast malate dehydrogenase OS=Nicotiana tabacum GN=chMDH PE=2 SV=1	25.4545	12	90	2	440	48.232	6.77				metabolic process		catalytic activity	Pf00056, Pf02866	104.5	109	106.3	1.04306	1.01722	0.975229	6.88	2088.75
A7U629	Chloroplast methionine sulfoxide reductase B2 OS=Nicotiana tabacum GN=MsrB2 PE=2 SV=1	9.95025	2	7	2	201	21.522	8.84				metabolic process;response to stimulus		catalytic activity	Pf01641	169.5	53	76.7	0.312684	0.452507	1.44717	0.585	121.292
B2C7Y6	Chloroplast N receptor-interacting protein 1 OS=Nicotiana benthamiana GN=NRIP1 PE=1 SV=1	12.973	2	5	2	185	20.055	7.46						protein binding	Pf00581	140.3	67.4	59.2	0.480399	0.421953	0.878338	0.778	127.685
Q0PWS6	Chloroplast pigment-binding protein CP24 OS=Nicotiana tabacum GN=Lhcb6 PE=2 SV=1	11.284	2	5	2	257	27.317	6.04				metabolic process	membrane		Pf00504	196.1	18.2	28.7	0.0928098	0.146354	1.57692	0.701	50.22
I0B7J6	Chloroplast PsbP2 OS=Nicotiana benthamiana GN=psbP2 PE=2 SV=1	33.9623	8	172	2	265	28.498	8.21				metabolic process		metal ion binding	Pf01789	128.5	69.1	75.1	0.537743	0.584436	1.08683	14.399	5391.88
A0A076KWG9	Chloroplast sedoheptulose-1,7-bisphosphatase OS=Nicotiana tabacum PE=2 SV=1	22.6463	9	210	2	393	42.298	6.57				metabolic process		catalytic activity	Pf00316	168.1	63.3	97.7	0.376562	0.581202	1.54344	6.017	4833.1
K4AXC0	Citrate synthase OS=Solanum lycopersicum GN=Solyc01g073740.2 PE=3 SV=1	4.43038	2	2	2	474	53.015	8.24		Solyc01g073740.2	1	metabolic process;response to stimulus		catalytic activity;metal ion binding;nucleotide binding	Pf00285	133.9	54.1	49.4	0.404033	0.368932	0.913124	0.222	68.56
A0A077DBK4	Class II small heat shock protein Le-HSP17.6 OS=Nicotiana tabacum PE=2 SV=1	15.9236	2	6	2	157	17.625	6.6							Pf00011	126.1	76.2	72	0.604282	0.570975	0.944882	2.728	183.48
O23792	CND41, chloroplast nucleoid DNA binding protein OS=Nicotiana tabacum GN=cnd41 PE=2 SV=1	4.18327	2	8	2	502	53.413	8.63				metabolic process		catalytic activity	Pf00026, Pf14541, Pf14543	75.6	179.1	92	2.36905	1.21693	0.51368	0.369	148.63
Q309E8	Cryptochrome 1 OS=Nicotiana sylvestris GN=cry1 PE=2 SV=1	3.67107	2	2	2	681	77.099	5.81	104213939	CRY1		metabolic process;response to stimulus		catalytic activity	Pf00875, Pf03441, Pf12546	110.1	90.6	90.7	0.822888	0.823797	1.0011	0.116	76.734
A0A0F7R0S4	Cystathionine gamma synthase OS=Nicotiana benthamiana GN=NbCGS1a PE=2 SV=1	9.60145	5	10	2	552	58.953	6.58				metabolic process		catalytic activity	Pf00266, Pf01053, Pf01212, Pf03841	124.7	99.3	102.2	0.796311	0.819567	1.0292	0.607	148.271
A0A059TCM2	Cystein protease inhibitor 4 OS=Nicotiana tabacum GN=CYS5 PE=2 SV=1	15.4472	2	3	2	123	13.41	9.99				metabolic process;regulation of biological process		catalytic activity;enzyme regulator activity	Pf00031, Pf07430	76.9	100.8	79.1	1.31079	1.02861	0.784722	0.778	96.7267
Q42947	Dehydroquinate dehydratase/shikimate dehydrogenase (Fragment) OS=Nicotiana tabacum PE=2 SV=1	12.0898	4	8	2	579	62.971	5.94				metabolic process		catalytic activity;nucleotide binding	Pf01487, Pf01488, Pf08501	78	97	93.2	1.24359	1.19487	0.960825	0.585	194.198
O65917	Dehydroquinate dehydratase/shikimate:NADP oxidoreductase OS=Solanum lycopersicum GN=LOC543548 PE=2 SV=1	6.97248	4	9	2	545	59.06	6.24	543548	LOC543548; Solyc01g067750.2	1	metabolic process		catalytic activity;nucleotide binding	Pf01487, Pf01488, Pf08501	83.6	86.4	90.6	1.03349	1.08373	1.04861	0.63	212.687
A0A024AXE8	Dihydroflavonol reductase OS=Nicotiana tabacum PE=2 SV=1	5.55556	2	3	2	324	35.711	5.86				metabolic process		catalytic activity	Pf00106, Pf01073, Pf01370, Pf02719, Pf03435, Pf05368, Pf07993, Pf08659, Pf13460	109	78.9	82	0.723853	0.752294	1.03929	0.274	70.7767
M1CL86	Dihydrolipoyl dehydrogenase OS=Solanum tuberosum GN=PGSC0003DMG400027156 PE=4 SV=1	25	15	116	2	500	52.825	7.34	102605442	LOC102605442; PGSC0003DMG400027156	5	cellular homeostasis;metabolic process;regulation of biological process		catalytic activity;nucleotide binding	Pf00070, Pf02852, Pf07992, Pf12831	47.1	133.6	109.8	2.83652	2.33121	0.821856	5.043	2529.58
P93352	Elongation factor 2 (Fragment) OS=Nicotiana tabacum GN=EF2 PE=2 SV=1	12.2905	3	3	2	179	19.862	5.49				metabolic process		nucleotide binding;RNA binding	Pf03764, Pf14492	108.3	38.4	43.4	0.354571	0.400739	1.13021	0.874	48.9567
K4CCP7	Elongation factor Ts OS=Solanum lycopersicum GN=Solyc07g018360.2 PE=3 SV=1	15.6489	17	53	2	1048	113.76	4.81	101245558	LOC101245558; Solyc07g018360.2	7	metabolic process;response to stimulus		protein binding;RNA binding	Pf00575, Pf00627, Pf00889, Pf03344	205.3	16.9	38.2	0.0823186	0.186069	2.26036	1.818	1246.08
O04946	Enoyl-ACP reductase OS=Nicotiana tabacum GN=enr-T2 PE=4 SV=1	10.2041	4	50	2	392	41.754	8.78				metabolic process		catalytic activity	Pf00148, Pf13561	109.2	97.3	103.8	0.891026	0.950549	1.0668	1.462	1342.26
B3VMR3	Epoxide hydrolase OS=Nicotiana benthamiana GN=NbEH2.1 PE=2 SV=1	7.30159	2	2	2	315	35.557	6.46				metabolic process		catalytic activity	Pf00561, Pf12695, Pf12697	131.2	71	73.4	0.541159	0.559451	1.0338	0.274	62.06
P41380	Eukaryotic initiation factor 4A-3 OS=Nicotiana plumbaginifolia PE=2 SV=1	7.92839	2	2	2	391	44.166	5.87				metabolic process		catalytic activity;nucleotide binding;RNA binding	Pf00270, Pf00271, Pf04851	130.1	77.2	85.5	0.59339	0.657187	1.10751	0.186	48.67
K4B937	Eukaryotic translation initiation factor 3 subunit D OS=Solanum lycopersicum GN=Solyc02g078120.1 PE=3 SV=1	4.85269	2	2	2	577	65.486	5.62	101252350	LOC101252350; Solyc02g078120.1	2	cell organization and biogenesis;metabolic process;regulation of biological process	cytoplasm;cytosol	RNA binding	Pf05091	73.9	114.5	88.3	1.54939	1.19486	0.771179	0.15	46.1
P69039	Eukaryotic translation initiation factor 5A-1 OS=Nicotiana plumbaginifolia GN=EIF-5A1 PE=2 SV=1	42.7673	7	12	2	159	17.36	6.14				metabolic process;regulation of biological process		RNA binding	Pf01287	112.4	68.9	80.8	0.612989	0.718861	1.17271	4.337	162.629
P24922	Eukaryotic translation initiation factor 5A-2 OS=Nicotiana plumbaginifolia GN=EIF-5A2 PE=2 SV=1	42.7673	7	13	2	159	17.353	5.99				metabolic process;regulation of biological process		RNA binding	Pf01287	115.9	64.2	83	0.553926	0.716135	1.29283	7.111	165.888
K4APY0	Eukaryotic translation initiation factor 6 OS=Solanum lycopersicum GN=Solyc00g007270.2 PE=3 SV=1	11.8367	2	8	2	245	26.308	4.78	101255078	LOC101255078		cell organization and biogenesis;metabolic process	cytoplasm;nucleus	RNA binding	Pf01912	75.8	108.8	117.8	1.43536	1.55409	1.08272	1.848	318.32
Q42896	Fructokinase-2 OS=Solanum lycopersicum GN=FRK2 PE=2 SV=2	24.3902	6	18	2	328	34.741	6.1	544022	FRK2; Solyc06g073190.2	6	metabolic process		catalytic activity;nucleotide binding	Pf00294	63.3	145.5	109.6	2.29858	1.73144	0.753265	0.688	551.13
A0A068JD95	Fructose-1,6-bisphosphatase OS=Nicotiana tabacum PE=2 SV=1	20.8824	8	63	2	340	37.266	6.73				metabolic process		catalytic activity	Pf00316	121.9	64	93.3	0.525021	0.765381	1.45781	6.406	1529.22
A0A068JIB0	Fructose-bisphosphate aldolase OS=Nicotiana tabacum PE=2 SV=1	11.6456	5	30	2	395	42.778	8.68				metabolic process		catalytic activity	Pf00274	86.7	101.9	105	1.17532	1.21107	1.03042	1.371	682.723
K4BAW0	Fructose-bisphosphate aldolase OS=Solanum lycopersicum GN=Solyc02g084440.2 PE=3 SV=1	32.398	12	106	2	392	42.371	8	101250853	LOC101250853; Solyc02g084440.2	2	metabolic process;response to stimulus	extracellular;membrane	catalytic activity	Pf00274	130.6	68.7	77.2	0.526034	0.591118	1.12373	9	3205.42
A1KXM7	FtsH-like protein OS=Solanum lycopersicum PE=2 SV=1	5.50847	2	6	2	708	75.966	6.05	100037730	LOC100037730	4	metabolic process;regulation of biological process;response to stimulus	membrane	catalytic activity;nucleotide binding	Pf00004, Pf01434, Pf06068, Pf07724, Pf07728	136.5	60.7	81.7	0.444689	0.598535	1.34596	0.301	113.66
P23432	Glucan endo-1,3-beta-glucosidase OS=Nicotiana tabacum GN=SP41A PE=1 SV=1	5.98291	2	21	2	351	39.162	6.4				cell death;defense response;metabolic process;response to stimulus	extracellular	catalytic activity	Pf00332	12.3	263.6	85.3	21.4309	6.93496	0.323596	0.54	96.0456
P15797	Glucan endo-1,3-beta-glucosidase, basic vacuolar isoform OS=Nicotiana tabacum PE=1 SV=2	10.2426	3	16	2	371	40.484	7.64				defense response;metabolic process;response to stimulus	vacuole	catalytic activity	Pf00332, Pf01055	29.1	104.7	99.9	3.59794	3.43299	0.954155	2.384	403.559
Q15I65	Glucose-1-phosphate adenylyltransferase OS=Solanum habrochaites GN=AgpL1 PE=3 SV=1	3.41556	2	5	2	527	58.533	7.56				metabolic process		catalytic activity	Pf00483	141.1	67.1	85.2	0.475549	0.603827	1.26975	0.136	87.48
Q68HC9	Glucose-6-phosphate isomerase OS=Solanum tuberosum GN=GPI PE=2 SV=1	18.838	11	30	2	568	62.832	6.96	102577825	GPI		metabolic process		catalytic activity	Pf00342	53.8	117.9	144.3	2.19145	2.68216	1.22392	2.268	719.225
Q8RU71	Glucosyltransferase OS=Nicotiana tabacum GN=NtGT2 PE=2 SV=1	4.25532	2	4	2	470	52.782	5.8				metabolic process		catalytic activity	Pf00201, Pf03033	154	76.7	76	0.498052	0.493506	0.990874	0.318	76.3814
K4C284	Glutamate decarboxylase OS=Solanum lycopersicum GN=Solyc05g054050.2 PE=2 SV=1	8.04829	5	21	2	497	56.136	5.88	101251185	LOC101251185; Solyc05g054050.2	5	metabolic process		catalytic activity	Pf00282	49.3	140.5	133.9	2.8499	2.71602	0.953025	1.346	277.351
Q6QD77	Glutathione reductase (Fragment) OS=Capsicum annuum GN=GR1 PE=2 SV=1	20.7101	3	8	2	169	18.802	7.37				metabolic process		catalytic activity;nucleotide binding	Pf00070, Pf07992, Pf13434	65.4	141.4	112.4	2.16208	1.71865	0.794908	1.424	153.253
A5YWI8	Glutathione S-transferase OS=Solanum commersonii PE=3 SV=1	18.7793	3	11	2	213	23.843	6.43				metabolic process		catalytic activity;protein binding	Pf00043, Pf02798, Pf13409, Pf13410, Pf13417, Pf14497	79.9	125.6	110.6	1.57196	1.38423	0.880573	3.125	193.858
Q6XX17	Glutathione S-transferase U1 (Fragment) OS=Nicotiana benthamiana PE=2 SV=1	26.8908	3	9	2	119	13.507	5.27				metabolic process		catalytic activity;protein binding	Pf02798, Pf13409, Pf13417	132	61.1	80.4	0.462879	0.609091	1.31588	4.179	166.987
P93364	Glycosyltransferase OS=Nicotiana tabacum GN=IS10a PE=2 SV=1	8.61345	3	7	2	476	53.42	6.27				metabolic process		catalytic activity	Pf00201	69	135	96.8	1.95652	1.4029	0.717037	0.73	190.361
K4C712	Glycylpeptide N-tetradecanoyltransferase OS=Solanum lycopersicum GN=Solyc06g062810.1 PE=3 SV=1	4.62963	2	3	2	432	49.648	7.03	101247132	LOC101247132; Solyc06g062810.1	6	metabolic process	cytosol;ribosome	catalytic activity	Pf01233, Pf02799	133.1	77.4	65.6	0.581518	0.492863	0.847545	0.245	43.85
Q9ZSP4	GrpE protein homolog OS=Nicotiana tabacum GN=GrpE1 PE=2 SV=1	13.0435	4	14	2	299	33.617	5.52				metabolic process;regulation of biological process	mitochondrion;organelle lumen	enzyme regulator activity;nucleotide binding;protein binding	Pf01025	80.5	108.3	98.4	1.34534	1.22236	0.908587	1.448	384.805
G8XSL1	GSH1 OS=Solanum lycopersicum GN=GSH1 PE=2 SV=1	5.54493	2	4	2	523	59.037	6.7	543536	GSH1; Solyc08g081010.2	8	cell organization and biogenesis;defense response;metabolic process;response to stimulus		catalytic activity	Pf04107	102.6	94.7	105.8	0.923002	1.03119	1.11721	0.269	93.63
P52885	GTP-binding protein SAR1 OS=Nicotiana tabacum GN=SAR1 PE=2 SV=1	11.1111	2	5	2	198	22.918	8.82				regulation of biological process;response to stimulus;transport	endoplasmic reticulum;Golgi	nucleotide binding	Pf00025, Pf00503, Pf01926, Pf08477, Pf09439	107.5	56.6	63.5	0.526512	0.590698	1.12191	1.154	130.39
P93340	Guanine nucleotide-binding protein subunit beta-like protein OS=Nicotiana plumbaginifolia PE=2 SV=1	31.5951	8	24	2	326	35.798	7.17						protein binding	Pf00400	96.7	118.9	95.8	1.22958	0.990693	0.805719	4.337	630.474
H1ZXA9	Heat shock protein 70 isoform 3 OS=Solanum lycopersicum GN=hsc70.3 PE=2 SV=1	27.6498	18	210	2	651	71.345	5.25	101055596	hsc70.3; Solyc04g011440.2	4	cell organization and biogenesis;metabolic process;response to stimulus	cytosol;extracellular;Golgi;membrane;mitochondrion	nucleotide binding;protein binding	Pf00012, Pf06723	70.2	142.7	91.6	2.03276	1.30484	0.641906	29.654	4168.64
A8W7B5	Heat shock protein 70 OS=Solanum lycopersicum GN=HSP70 PE=2 SV=1	20.2312	12	150	2	692	74.243	5.57	100134914	HSP70	11	cell organization and biogenesis;metabolic process;response to stimulus	membrane	nucleotide binding;protein binding	Pf00012, Pf06723	59	125.8	116.5	2.1322	1.97458	0.926073	2.758	3832.53
C5MTW1	Heterotrimeric G protein beta 1 subunit OS=Nicotiana benthamiana PE=2 SV=1	31.5951	8	22	2	326	35.802	7.12						protein binding	Pf00400	92.4	118.3	100.3	1.2803	1.0855	0.847844	3.806	562.991
A2IBL2	Histone H2B OS=Nicotiana benthamiana GN=H2b PE=2 SV=1	13.6054	2	2	2	147	15.849	10.14				cell organization and biogenesis	chromosome;nucleus	DNA binding;protein binding	Pf00125	127.2	49.8	72.9	0.391509	0.573113	1.46386	0.52	46.37
B8Y3H9	Hydrogen peroxide-induced 1 OS=Nicotiana tabacum PE=2 SV=1	26.7717	2	4	2	127	13.565	6.54								107.2	100.2	80	0.934701	0.746269	0.798403	0.995	126.66
Q93YF8	Hydroperoxide lyase OS=Nicotiana attenuata GN=hpl PE=2 SV=1	8.26613	4	12	2	496	55.499	7.78				metabolic process		catalytic activity;metal ion binding	Pf00067	167.4	55.9	63.1	0.333931	0.376941	1.1288	1.154	292.674
Q70G33	Hydroxycinnamoyl CoA quinate transferase OS=Nicotiana tabacum GN=hqt PE=2 SV=1	5.04587	2	4	2	436	48.367	7.53				metabolic process		catalytic activity	Pf02458	40.5	200.1	95.2	4.94074	2.35062	0.475762	0.369	44.464
Q1L5W3	Isoamylase isoform 2 (Fragment) OS=Nicotiana langsdorffii x Nicotiana sanderae GN=ISO2 PE=2 SV=1	4.13669	2	3	2	556	61.748	5.83				metabolic process		catalytic activity	Pf00128, Pf02922	141.8	73.8	86.5	0.520451	0.610014	1.17209	0.16	70.7006
P50218	Isocitrate dehydrogenase [NADP] OS=Nicotiana tabacum PE=2 SV=1	30.8434	12	51	2	415	46.7	6.48				metabolic process	cytoplasm	catalytic activity;metal ion binding;nucleotide binding	Pf00180	83.5	88.7	79.3	1.06228	0.949701	0.894025	7.532	1541.95
K4ASC2	Isocitrate dehydrogenase [NADP] OS=Solanum lycopersicum GN=Solyc01g005560.2 PE=3 SV=1	21.4458	8	18	2	415	46.659	6.8	101268602	LOC101268602; Solyc01g005560.2	1	defense response;metabolic process;response to stimulus	extracellular;membrane	catalytic activity;metal ion binding;nucleotide binding	Pf00180	82	37.8	34.6	0.460976	0.421951	0.915344	1.395	533.658
K4BBG9	Isocitrate dehydrogenase [NADP] OS=Solanum lycopersicum GN=Solyc02g086610.2 PE=3 SV=1	9.12951	4	15	2	471	52.686	7.75		Solyc02g086610.2	2	metabolic process		catalytic activity;metal ion binding;nucleotide binding	Pf00180	72.7	120.4	115.3	1.65612	1.58597	0.957641	0.484	415.339
Q9AVG7	Isopentenyl diphosphate isomerase 2 OS=Nicotiana tabacum GN=ipi2 PE=2 SV=1	28.0851	5	23	2	235	27.162	5.01				metabolic process		catalytic activity	Pf00293	73.4	99.9	89.9	1.36104	1.2248	0.8999	3.642	605.871
J9XUY3	Kunitz-type protease inhibitor (Fragment) OS=Nicotiana tabacum GN=KTPI PE=2 SV=1	17.2932	2	13	2	133	14.871	6.29				metabolic process;regulation of biological process		catalytic activity;enzyme regulator activity	Pf00197	18.8	286.2	25.1	15.2234	1.33511	0.0877009	2.594	244.105
Q9FXL9	L-galactono-1,4-lactone dehydrogenase OS=Nicotiana tabacum GN=GLDHase PE=2 SV=1	9.19932	4	7	2	587	66.635	7.8				metabolic process	membrane	catalytic activity;nucleotide binding	Pf01565, Pf04030	124.9	64.9	54.6	0.519616	0.43715	0.841294	0.377	162.329
C9DFA7	Late embryogenesis-like protein (Fragment) OS=Nicotiana benthamiana GN=Lea PE=2 SV=1	20.1439	2	4	2	139	15.148	5.27				response to stimulus			Pf03168	70	80.1	88.7	1.14429	1.26714	1.10737	1.783	66.0833
Q02200	Lignin-forming anionic peroxidase OS=Nicotiana sylvestris PE=2 SV=1	7.45342	2	2	2	322	34.624	7.56	104248753	LOC104248753		metabolic process;response to stimulus	extracellular	antioxidant activity;catalytic activity;metal ion binding	Pf00141	42	165.3	54	3.93571	1.28571	0.326679	0.274	64.27
Q6RW44	Ly200 protein OS=Capsicum annuum PE=2 SV=1	21.0526	2	17	2	133	15.59	10.65				metabolic process	ribosome	structural molecule activity	Pf01655	104.2	88.9	114.2	0.853167	1.09597	1.28459	18.307	583.831
A0A076KWG2	Malate dehydrogenase OS=Nicotiana tabacum PE=2 SV=1	26.8182	12	105	2	440	48.399	6.7				metabolic process		catalytic activity	Pf00056, Pf02866	106.2	109.3	109.8	1.02919	1.0339	1.00457	7.577	2536.07
K4CGU8	Malate dehydrogenase OS=Solanum lycopersicum GN=mMDH PE=3 SV=1	21.9653	6	227	2	346	36.059	8.56		Solyc07g062650.2	7	metabolic process		catalytic activity	Pf00056, Pf01073, Pf02866	80.9	122.7	111.7	1.51669	1.38072	0.91035	11.743	4681.62
J7EPI5	Methylenetetrahydrofolate reductase OS=Nicotiana tomentosiformis PE=2 SV=1	3.36134	2	2	2	595	67.421	5.82	104104896	LOC104104896		metabolic process		catalytic activity	Pf02219	91	110	82	1.20879	0.901099	0.745455	0.125	25.77
E0X585	Mitochondrial glycine decarboxylase complex P-protein-like protein OS=Nicotiana benthamiana GN=GDCP1 PE=2 SV=1	26.2857	12	267	2	350	37.57	6.52				metabolic process		catalytic activity	Pf02347	75.3	147.7	109.3	1.96149	1.45153	0.740014	56.797	5395.6
A0A097BU06	Mitochondrial succinyl-CoA ligase ADP-forming subunit alpha-2 OS=Nicotiana tabacum PE=2 SV=1	9.70588	2	4	2	340	35.487	8.88				metabolic process		catalytic activity	Pf00549, Pf02629, Pf13607	76	77.9	66.7	1.025	0.877632	0.856226	0.501	94.37
A0A097BTW6	Mitochondrial-like betaine aldehyde dehydrogenase 2 OS=Nicotiana tabacum PE=2 SV=1	10.3175	5	8	2	504	55.363	5.25				metabolic process		catalytic activity	Pf00171	56.1	130.2	112.2	2.32086	2	0.861751	1.031	179.815
Q6UJX4	Molecular chaperone Hsp90-1 OS=Solanum lycopersicum GN=Hsp90-1 PE=2 SV=1	13.5908	7	9	2	699	80.109	5.05	543902	Hsp90-1; Solyc12g015880.1	12	metabolic process;response to stimulus	cytosol;extracellular;Golgi;membrane;nucleus	nucleotide binding;protein binding	Pf00183, Pf02518, Pf13589	107.9	115.6	84.9	1.07136	0.78684	0.734429	0.431	251.626
P80266	NADH dehydrogenase [ubiquinone] 1 alpha subcomplex subunit 5 (Fragment) OS=Solanum tuberosum PE=1 SV=1	45.9459	4	21	2	37	4.07	9.42				metabolic process;transport	membrane;mitochondrion	catalytic activity	Pf04716	95.7	121.5	93.5	1.26959	0.977011	0.769547	214.443	418.11
F2Q9W0	Nitrite reductase OS=Solanum tuberosum GN=nir PE=2 SV=1	27.598	15	108	2	587	65.924	5.9	102581851	LOC102581851; NIR		metabolic process;response to stimulus	extracellular;membrane;mitochondrion	catalytic activity	Pf01077, Pf03460	88.7	111.6	96.6	1.25817	1.08906	0.865591	4.223	2585.22
Q58IU5	Non-intrinsic ABC protein (Fragment) OS=Nicotiana benthamiana PE=2 SV=1	5.86081	3	5	2	546	61.122	5.92				cell organization and biogenesis;metabolic process			Pf01458	149.1	72.8	83.9	0.488263	0.56271	1.15247	0.322	109.021
M1AZ35	Non-specific lipid-transfer protein OS=Solanum tuberosum GN=PGSC0003DMG400012837 PE=3 SV=1	13.5593	2	9	2	118	11.88	8.9		PGSC0003DMG400012837	10	transport			Pf00234, Pf03043	81.4	140.1	102.1	1.72113	1.2543	0.728765	0.585	315.33
Q9XIY9	NtPRp27 OS=Nicotiana tabacum PE=2 SV=1	4.13223	2	9	2	242	27.361	9.28							Pf04450, Pf13485	35.3	114.3	114.5	3.23796	3.24363	1.00175	1.61	129.705
W6JJ90	Nuclear pore complex protein Sec13d OS=Nicotiana benthamiana GN=NbSec13d PE=2 SV=1	18.8742	4	7	2	302	32.608	6.3						protein binding	Pf00400, Pf12657	87.9	107.9	84	1.22753	0.955631	0.778499	1.054	278.524
W6JLY5	Nuclear pore complex protein TPRa OS=Nicotiana benthamiana GN=NbTPRa PE=2 SV=1	1.36919	2	4	2	2045	229.571	4.98				transport			Pf01496, Pf01576, Pf02463, Pf05557, Pf06156, Pf07888, Pf07926, Pf08317, Pf09726, Pf12128, Pf13166, Pf13949	73	157.5	91.5	2.15753	1.25342	0.580952	0.033	186.31
C7TPG6	Nuclear RNA binding protein OS=Solanum tuberosum GN=rgga PE=2 SV=1	4.44444	2	2	2	360	39.067	6.87	102577886	RGGA					Pf04774	95.2	111.4	88.1	1.17017	0.92542	0.790844	0.274	30.22
E1AWW9	Ornithine aminotransferase OS=Nicotiana tabacum GN=delta-OAT PE=2 SV=1	4.61216	2	3	2	477	52.382	7.9				metabolic process		catalytic activity	Pf00155, Pf00202	82.4	103.6	74	1.25728	0.898058	0.714286	0.292	40.22
P14170	Osmotin OS=Nicotiana tabacum GN=AP24 PE=1 SV=2	8.13008	2	30	2	246	26.663	7.8				defense response;response to stimulus	vacuole		Pf00314	37.7	131.9	84	3.49867	2.22812	0.636846	3.217	732.823
Q41231	Pathogen-and wound-inducible antifungal protein CBP20 OS=Nicotiana tabacum GN=CBP20 PE=2 SV=1	14.6919	2	15	2	211	22.153	8.02				defense response;response to stimulus			Pf00187, Pf00967	45.4	106.9	91.6	2.35463	2.01762	0.856876	6.197	467.28
P07052	Pathogenesis-related protein R minor form OS=Nicotiana tabacum PE=2 SV=1	13.2743	2	48	2	226	24.535	5.53				defense response;response to stimulus	vacuole		Pf00314	41.3	245.9	67.8	5.954	1.64165	0.275722	12.895	1658.64
A0A076L1Z7	Peptide methionine sulfoxide reductase-like protein OS=Nicotiana tabacum PE=2 SV=1	4.28016	2	19	2	257	28.759	7.97				metabolic process;response to stimulus		catalytic activity	Pf01625	111.5	102.4	102.9	0.918386	0.92287	1.00488	1.448	368.801
B1PDK0	Peptidyl-prolyl cis-trans isomerase OS=Capsicum annuum PE=2 SV=1	8.72093	3	7	2	172	18.115	8.47				metabolic process		catalytic activity	Pf00160	81.8	90.6	89	1.10758	1.08802	0.98234	0.701	120.663
K4BM64	Peptidyl-prolyl cis-trans isomerase OS=Solanum lycopersicum GN=Solyc03g119150.2 PE=4 SV=1	5	2	4	2	260	27.378	8.09	101251075	LOC101251075; Solyc03g119150.2	3	metabolic process	membrane	catalytic activity	Pf00254	156.8	51.4	58.8	0.327806	0.375	1.14397	0.874	97.97
M1A7D2	Peptidyl-prolyl cis-trans isomerase OS=Solanum tuberosum GN=PGSC0003DMG400006351 PE=4 SV=1	15.0538	2	3	2	186	19.91	7.15	102605512	LOC102605512; PGSC0003DMG400006351	4	metabolic process		catalytic activity	Pf00254	109.9	74	91.9	0.673339	0.836215	1.24189	0.778	51.9167
M1B7H0	Peptidyl-prolyl cis-trans isomerase OS=Solanum tuberosum GN=PGSC0003DMG400015011 PE=4 SV=1	8.51064	2	39	2	235	25.497	7.8	102598512	LOC102598512; PGSC0003DMG400015011	4	metabolic process		catalytic activity	Pf00254	121.1	99.4	95.8	0.820809	0.791082	0.963783	1.683	702.569
K4AR66	Peroxidase OS=Solanum lycopersicum GN=Solyc00g072400.2 PE=3 SV=1	9.71787	3	6	2	319	34.627	8.76	101246908	LOC101246908		metabolic process;response to stimulus	extracellular	antioxidant activity;catalytic activity;metal ion binding	Pf00141	38.7	149.4	106.8	3.86047	2.75969	0.714859	0.585	73.77
M1DAI9	Peroxidase OS=Solanum tuberosum GN=PGSC0003DMG400035475 PE=3 SV=1	8.69565	2	4	2	322	35.226	6.86	102599553	LOC102599553; PGSC0003DMG400035475	10	metabolic process;response to stimulus		antioxidant activity;catalytic activity;metal ion binding	Pf00141	120.8	139.2	71.7	1.15232	0.593543	0.515086	0.438	125.51
R9W2E1	Peroxiredoxin 2B OS=Nicotiana benthamiana PE=2 SV=1	44.4444	4	54	2	162	17.514	6.19				metabolic process		antioxidant activity;catalytic activity	Pf00578, Pf08534	102.5	70.7	82.6	0.689756	0.805854	1.16832	26.826	1550.36
Q40893	Petunia ribulose 1,5-bisphosphate carboxylase small subunit mRNA (clone pSSU 41), partial cds (Fragment) OS=Petunia hybrida PE=2 SV=1	50	3	134	2	46	5.211	8.16							Pf00101	128.1	58.7	98.1	0.458236	0.765808	1.67121	55.234	1133.37
A0A077DCL8	Phosphoenolpyruvate carboxykinase OS=Nicotiana tabacum PE=2 SV=1	3.02115	2	2	2	662	73.484	7.02				metabolic process		catalytic activity;nucleotide binding	Pf01293	76.1	153	52.5	2.01051	0.689882	0.343137	0.125	64.43
Q30GW2	Phosphoglycerate kinase (Fragment) OS=Solanum chmielewskii GN=CT114 PE=3 SV=1	52.6786	11	75	2	224	23.147	5.14				metabolic process		catalytic activity	Pf00162	80.9	102.6	116.4	1.26823	1.43881	1.1345	14.399	2124.5
K4CLQ6	Phospholipase D OS=Solanum lycopersicum GN=Solyc08g066800.2 PE=3 SV=1	5.08055	3	9	2	807	91.969	5.99	101257989	LOC101257989; TPLD; Solyc08g066800.2	8	metabolic process	membrane	catalytic activity;metal ion binding;protein binding	Pf00168, Pf00614, Pf12357, Pf13091	145.6	51.8	59.4	0.355769	0.407967	1.14672	0.253	258.929
A0A059Q6D7	Photosystem I P700 chlorophyll a apoprotein A2 OS=Hyoscyamus niger GN=psaB PE=3 SV=1	4.63215	2	3	2	734	82.268	7.17	19591350	psaB		metabolic process;transport	membrane	catalytic activity;metal ion binding	Pf00223	193.7	44.9	54.8	0.231802	0.282912	1.22049	0.389	60.1
Q41229	Photosystem I reaction center subunit IV B, chloroplastic OS=Nicotiana sylvestris GN=PSAEB PE=1 SV=1	32.8671	3	26	2	143	15.215	9.74	104216219	LOC104216219		metabolic process	membrane		Pf02427	94.2	142.1	93.4	1.50849	0.991507	0.657284	9	827.759
A0A075VUZ8	Photosystem II D2 protein OS=Capsicum annuum GN=orf353 PE=3 SV=1	8.78187	2	22	2	353	39.478	5.74				metabolic process;transport	membrane;mitochondrion	metal ion binding	Pf00124	209	31.5	35.3	0.150718	0.1689	1.12063	5.579	727.541
K4CU78	Photosystem II reaction center Psb28 protein OS=Solanum lycopersicum GN=Solyc09g064500.2 PE=3 SV=1	14.4444	2	45	2	180	20.139	9.36	101245880	LOC101245880; Solyc09g064500.2	9	metabolic process	membrane		Pf03912	99.8	119.2	101.5	1.19439	1.01703	0.85151	4.012	962.584
P35476	Plastocyanin A'/A'' OS=Nicotiana tabacum PE=1 SV=1	54.5455	3	468	2	99	10.444	4.41				metabolic process;transport	membrane	metal ion binding	Pf00127, Pf13473	109.1	121.6	100.9	1.11457	0.92484	0.82977	5.62341e+06	7299.46
P35477	Plastocyanin B'/B'' OS=Nicotiana tabacum PE=1 SV=1	54.5455	3	384	2	99	10.352	4.41				metabolic process;transport	membrane	metal ion binding	Pf00127, Pf13473	118.2	114.2	101.7	0.966159	0.860406	0.890543	5.62341e+06	5676.29
K9LZ88	Polyadenylate-binding protein (Fragment) OS=Nicotiana benthamiana PE=2 SV=1	8.8647	3	9	2	643	70.47	7.78					cytoplasm	nucleotide binding;RNA binding	Pf00076, Pf00658, Pf08777, Pf13893, Pf14259	95.9	114	99.9	1.18874	1.04171	0.876316	0.417	130.03
A0A059XN47	Polygalacturonase inhibitor protein OS=Nicotiana tabacum PE=2 SV=1	11.4804	4	14	2	331	37.58	8.56						protein binding	Pf08263, Pf12799, Pf13855	32.7	159.7	107	4.88379	3.27217	0.670006	1.976	281.22
E5LBC4	Prephenate aminotransferase OS=Solanum lycopersicum GN=PAT PE=2 SV=1	6.875	2	6	2	480	51.289	7.43	100736464	PAT; Solyc04g054710.2	4	metabolic process		catalytic activity	Pf00155, Pf00266, Pf01041	82.6	86.4	100.8	1.046	1.22034	1.16667	0.557	175.913
Q43582	Probable U6 snRNA-associated Sm-like protein LSm4 OS=Nicotiana tabacum PE=2 SV=1	17.8082	2	3	2	146	15.832	9.99				metabolic process	nucleus;spliceosomal complex	RNA binding	Pf01423	103.1	95.1	97	0.922405	0.940834	1.01998	0.874	41.7567
Q93YI9	Profilin OS=Capsicum annuum PE=1 SV=1	6.87023	2	6	2	131	14.175	4.7				cell organization and biogenesis	cytoplasm;cytoskeleton	protein binding	Pf00235	93.6	107.6	110	1.14957	1.17521	1.0223	2.981	86.1357
Q41344	Profilin-1 OS=Solanum lycopersicum GN=PRO1 PE=2 SV=1	6.76692	2	19	2	133	14.425	5.2	544018	Pro1; Solyc12g044630.1	12	cell organization and biogenesis	cytoplasm;cytoskeleton;nucleus	protein binding	Pf00235	79.2	102.1	113.6	1.28914	1.43434	1.11263	1.683	183.051
K4D300	Proteasome subunit alpha type OS=Solanum lycopersicum GN=Solyc10g081130.1 PE=3 SV=1	24.8996	6	22	2	249	27.122	6.43	101253544	LOC101253544; Solyc10g081130.1	10	metabolic process;response to stimulus	cytoplasm;cytosol;extracellular;membrane;nucleus;proteasome;vacuole	catalytic activity	Pf00227, Pf10584	66	125.8	115.4	1.90606	1.74848	0.917329	2.875	639.333
M1BNM8	Proteasome subunit alpha type OS=Solanum tuberosum GN=PGSC0003DMG401019187 PE=3 SV=1	17.6707	4	12	2	249	27.558	6.35	102589450	LOC102589450; PGSC0003DMG401019187	10	metabolic process	cytoplasm;nucleus;proteasome	catalytic activity	Pf00227, Pf10584	94.1	92	117.1	0.977683	1.24442	1.27283	1.683	202.337
K4BYA3	Proteasome subunit beta type OS=Solanum lycopersicum GN=Solyc05g013820.2 PE=3 SV=1	12.8514	3	11	2	249	26.754	7.24		Solyc05g013820.2	5	metabolic process	cytoplasm;nucleus;proteasome	catalytic activity	Pf00227	77.4	123.6	110.1	1.5969	1.42248	0.890777	2.162	275.41
M0ZYC1	Protein disulfide-isomerase OS=Solanum tuberosum GN=PGSC0003DMG400004150 PE=3 SV=1	4.65587	2	11	2	494	54.863	4.93	102594080	LOC102594080; PGSC0003DMG400004150	6	cellular homeostasis;metabolic process;regulation of biological process;response to stimulus	endoplasmic reticulum;Golgi;membrane;vacuole	catalytic activity	Pf00085, Pf13098, Pf13848, Pf13899, Pf13905	79.5	108.8	104.9	1.36855	1.3195	0.964154	0.075	126.465
M1BHF1	Protein disulfide-isomerase OS=Solanum tuberosum GN=PGSC0003DMG400017569 PE=3 SV=1	10.0604	6	48	2	497	55.592	5.01	102592089	LOC102592089; PGSC0003DMG400017569	6	cellular homeostasis;metabolic process;regulation of biological process	endoplasmic reticulum	catalytic activity	Pf00085, Pf13098, Pf13848, Pf13899, Pf13905	71.3	128.3	113.9	1.79944	1.59748	0.887763	2.054	1112.9
A0A075F1U5	Protein tyrosine phosphatase OS=Nicotiana tabacum GN=ptpkis1 PE=2 SV=1	7.21925	2	2	2	374	41.778	5.21				metabolic process		catalytic activity	Pf00782	171.2	71.4	63.7	0.417056	0.372079	0.892157	0.212	119.82
K4CBX4	Purple acid phosphatase OS=Solanum lycopersicum GN=Solyc07g008550.2 PE=3 SV=1	3.99361	2	2	2	626	70.946	7.01	101256101	LOC101256101; Solyc07g008550.2	7	metabolic process		catalytic activity;metal ion binding	Pf00149, Pf14008	53	133.5	92.6	2.51887	1.74717	0.693633	0.133	59.49
Q6J5M8	Purple acid phosphatase OS=Solanum tuberosum GN=PAP3 PE=2 SV=1	1.88679	2	2	2	477	54.784	7.01	102577583	PAP3		metabolic process		catalytic activity;metal ion binding	Pf00149, Pf14008	93.8	136.3	96.8	1.45309	1.03198	0.710198	0.202	25.89
M0ZSX2	Purple acid phosphatase OS=Solanum tuberosum GN=PGSC0003DMG400002845 PE=3 SV=1	4.77658	2	3	2	649	73.029	7.39	102586236	LOC102586236; PGSC0003DMG400002845	4	metabolic process;regulation of biological process	endosome;Golgi;mitochondrion	catalytic activity;metal ion binding	Pf00149, Pf14008	58.9	143.1	119.2	2.42954	2.02377	0.832984	0.225	63.0167
M1CR75	Purple acid phosphatase OS=Solanum tuberosum GN=PGSC0003DMG400028371 PE=3 SV=1	4.90998	3	3	2	611	68.739	6.92	102595766	LOC102595766; PGSC0003DMG400028371	5	metabolic process		catalytic activity;metal ion binding	Pf00149, Pf12850, Pf14008	87.4	120.6	89.7	1.37986	1.02632	0.743781	0.218	105.073
B1Q484	Putative 4-methyl-5(B-hydroxyethyl)-thiazol monophosphate biosynthesis enzyme OS=Capsicum chinense PE=2 SV=1	6.88776	2	7	2	392	41.657	5.52							Pf01965, Pf13278	75.7	121.1	117.4	1.59974	1.55086	0.969447	0.438	274.173
Q5NTA8	Putative 5-epi-aristolochene synthase (Fragment) OS=Nicotiana tabacum GN=HRR8 PE=2 SV=1	32.2222	2	3	2	90	10.038	5.36				metabolic process		catalytic activity;metal ion binding	Pf03936	33.6	117.2	156.7	3.4881	4.66369	1.33703	0.931	72.8867
B5LAT4	Putative branched-chain alpha-keto acid dehydrogenase E1 beta subunit OS=Capsicum annuum PE=2 SV=1	7.20222	2	3	2	361	39.489	6.33				metabolic process		catalytic activity	Pf02779, Pf02780	140	69.3	97.5	0.495	0.696429	1.40693	0.212	63.7167
B5LAT9	Putative caffeoyl-CoA 3-O-methyltransferase OS=Capsicum annuum PE=2 SV=1	7.28745	2	4	2	247	27.805	5.49				metabolic process		catalytic activity	Pf01596, Pf12847, Pf13578, Pf13847	44.2	106.1	106	2.40045	2.39819	0.999057	0.54	74.86
B1Q488	Putative Ran/TC4 protein OS=Capsicum chinense PE=2 SV=1	8.59729	2	9	2	221	25.192	6.86				metabolic process;regulation of biological process;response to stimulus;transport		catalytic activity;nucleotide binding	Pf00025, Pf00071, Pf08477	90.5	91	113	1.00552	1.24862	1.24176	1.031	247.469
K4DC28	Pyruvate dehydrogenase E1 component subunit alpha OS=Solanum lycopersicum GN=Solyc12g009400.1 PE=4 SV=1	24.5455	9	27	2	440	48.7	7.3	101256355	LOC101256355; Solyc12g009400.1	12	metabolic process		catalytic activity	Pf00676, Pf02775	133	85.4	83.5	0.642105	0.62782	0.977752	2.562	535.848
Q1I0X5	Pyruvate kinase OS=Capsicum annuum PE=2 SV=1	4.69667	2	2	2	511	55.373	6.84				metabolic process		catalytic activity;metal ion binding	Pf00224, Pf02887	93.2	110.2	86.1	1.1824	0.92382	0.781307	0.145	23.92
F8WQS4	Quinone reductase (Fragment) OS=Nicotiana benthamiana GN=GR PE=2 SV=1	38.6935	6	86	2	199	21.229	6.18				metabolic process;regulation of biological process		catalytic activity;nucleotide binding	Pf00258, Pf03358	73.2	109.6	115.6	1.49727	1.57923	1.05474	34.112	1960.15
K4BP02	Ribosomal protein L15 OS=Solanum lycopersicum GN=Solyc04g008460.2 PE=3 SV=1	8.33333	2	3	2	204	24.174	11.49	101256173	LOC101256173; Solyc04g008460.2	4	metabolic process	ribosome	structural molecule activity	Pf00827	107	101.4	87	0.947664	0.813084	0.857988	0.425	19.73
A5A5A1	Ribosomal protein L25 OS=Nicotiana benthamiana PE=2 SV=1	6.77291	2	2	2	251	27.97	9.72				metabolic process	ribosome	RNA binding;structural molecule activity	Pf01386, Pf14693	154.9	54.8	87	0.353777	0.561653	1.58759	0.311	60.7309
Q2VCJ2	Ribosomal protein L3-like OS=Solanum tuberosum GN=PGSC0003DMG400029760 PE=2 SV=1	21.3368	12	46	2	389	44.336	10.08	102598069	LOC102598069; PGSC0003DMG400029760	1	metabolic process	cytosol;membrane;ribosome;vacuole	structural molecule activity	Pf00297	92.8	129.8	98	1.39871	1.05603	0.755008	4.055	563.438
W8E6Q0	Ribulose 1,5-bisphosphate carboxylase (Fragment) OS=Capsicum annuum GN=rbcL PE=3 SV=1	34.0376	21	2079	2	426	47.243	7.17				metabolic process		catalytic activity;metal ion binding	Pf00016, Pf02788	125.4	67.7	81.9	0.539872	0.65311	1.20975	2014.34	28827.9
Q7YM65	Ribulose bisphosphate carboxylase large chain (Fragment) OS=Browallia speciosa GN=rbcL PE=3 SV=1	44.3548	25	1669	2	372	41.22	7.8				metabolic process		catalytic activity;metal ion binding	Pf00016, Pf02788	113.6	55	94.2	0.484155	0.829225	1.71273	4327.76	28069.2
G8D520	Ribulose bisphosphate carboxylase large chain (Fragment) OS=Physalis heterophylla GN=rbcL PE=3 SV=1	43.0693	8	472	2	202	22.512	8.19				metabolic process		catalytic activity;metal ion binding	Pf00016, Pf02788	87.8	91.4	108.7	1.041	1.23804	1.18928	99	6953.58
Q84QE5	Ribulose bisphosphate carboxylase small chain OS=Nicotiana tabacum PE=2 SV=1	22.7778	3	188	2	180	20.268	7.71				metabolic process		catalytic activity	Pf00101, Pf12338	94.5	65.8	85.8	0.696296	0.907937	1.30395	13.251	2573.06
P22433	Ribulose bisphosphate carboxylase small chain S41, chloroplastic OS=Nicotiana sylvestris PE=3 SV=1	16.0221	3	176	2	181	20.461	7.05	104210868	LOC104210868		metabolic process		catalytic activity	Pf00101, Pf12338	100.9	55	74.9	0.545094	0.742319	1.36182	13.251	2103.81
V9INR4	Ribulose bisphosphate carboxylase/oxygenase activase 2 OS=Nicotiana attenuata GN=rca2 PE=2 SV=1	26.6515	9	56	2	439	48.252	7.74						nucleotide binding	Pf00004, Pf06309	104	83.4	94.5	0.801923	0.908654	1.13309	6.586	1390.19
E5FE88	Ribulose-1,5-bisphosphate/carboxylase large subunit (Fragment) OS=Cestrum macrophyllum GN=rbcL PE=3 SV=1	49.2958	7	414	2	142	15.9	5.29				metabolic process		catalytic activity;metal ion binding	Pf02788	94.9	70	118	0.737619	1.24341	1.68571	463.159	6257.25
Q60CZ3	Ribulose-phosphate 3-epimerase, cytoplasmic isoform, putative OS=Solanum demissum GN=SDM1_52t00010 PE=4 SV=2	10.6227	2	6	2	273	29.342	5.78				metabolic process		catalytic activity;metal ion binding	Pf00834	76.7	111.3	117.4	1.45111	1.53064	1.05481	0.874	203.567
Q40436	RNA-binding glycine rich protein OS=Nicotiana sylvestris PE=2 SV=1	11.1969	2	2	2	259	26.601	4.96	104220016	LOC104220016				nucleotide binding	Pf00076, Pf13893, Pf14259	100.8	91.9	100.7	0.911706	0.999008	1.09576	0.468	50.88
Q40425	RNA-binding gricine-rich protein-1c OS=Nicotiana sylvestris PE=2 SV=1	23.0303	4	46	2	165	16.735	5.72	104249507	LOC104249507		response to stimulus		DNA binding;nucleotide binding;RNA binding	Pf00076, Pf13893, Pf14259	169.8	19.5	44.5	0.114841	0.262073	2.28205	4.623	1078.16
A0A0F7R532	S-adenosylmethionine synthetase OS=Nicotiana benthamiana GN=NbSAMS1a PE=2 SV=1	36.4103	10	28	2	390	42.598	6.29				metabolic process		catalytic activity;metal ion binding;nucleotide binding	Pf00438, Pf02772, Pf02773	92.6	105.4	99.6	1.13823	1.07559	0.944972	3.217	604.708
A0ZVU2	S-adenosylmethionine transporter OS=Nicotiana benthamiana GN=samt PE=2 SV=1	7.05521	2	2	2	326	34.639	9.51				transport	membrane		Pf00153	122.2	68.7	79.7	0.562193	0.652209	1.16012	0.292	58.2883
J9Y6P6	Salicylic acid-binding protein 2 OS=Nicotiana benthamiana GN=SABP2 PE=2 SV=1	11.1538	2	4	2	260	29.194	5.59							Pf00561, Pf07819, Pf12695, Pf12697	65.9	179.2	84.3	2.71927	1.27921	0.470424	0.389	141.828
Q68GS0	SKP1 OS=Nicotiana tabacum GN=SKP1 PE=2 SV=1	50.9677	7	30	2	155	17.517	4.65				metabolic process			Pf01466, Pf03931	68.4	115.9	105.7	1.69444	1.54532	0.911993	9	903.647
B6CNU8	SKP1-like protein 3 OS=Petunia hybrida GN=PSK3 PE=2 SV=1	50.9677	7	20	2	155	17.559	4.68				metabolic process			Pf01466, Pf03931	53.3	112.2	107.7	2.10507	2.02064	0.959893	9	549.13
M1C498	Small ubiquitin-related modifier OS=Solanum tuberosum GN=PGSC0003DMG400023103 PE=3 SV=1	11.1111	2	8	2	108	12.065	4.97	102593982	LOC102593982; PGSC0003DMG400023103	9	metabolic process	nucleus	protein binding	Pf00240, Pf11976	111.3	77.2	90.4	0.693621	0.812219	1.17098	5.813	153.005
Q3C2L6	Sorbitol related enzyme OS=Solanum lycopersicum GN=LeSDH PE=2 SV=1	5.35211	2	7	2	355	38.101	6.29	778312	SDH; Solyc01g006510.2	1	metabolic process	cytoplasm	catalytic activity;metal ion binding	Pf00107, Pf08240, Pf12847	117.2	73.9	72.1	0.630546	0.615188	0.975643	0.35	58.1
W8RFY2	Spermidine synthase OS=Nicotiana tabacum PE=2 SV=1	9.85507	4	17	2	345	38.018	5.12				metabolic process		catalytic activity	Pf01564, Pf05430, Pf11899, Pf13578, Pf13659	68.8	130.7	116	1.89971	1.68605	0.887529	2.162	477.08
Q94IK1	Subunit A of ferredoxin-thioredoxin-reductase OS=Solanum tuberosum GN=ftrapot PE=2 SV=1	11.1111	2	4	2	171	18.772	9.04				metabolic process		catalytic activity	Pf02941	154.8	70.9	71	0.45801	0.458656	1.00141	0.638	80.26
D2KQI9	Succinate dehydrogenase [ubiquinone] iron-sulfur subunit, mitochondrial OS=Solanum lycopersicum GN=LOC100736507 PE=2 SV=1	7.66423	2	6	2	274	30.841	8.44	100736507	LOC100736507; Solyc02g093680.2	2	metabolic process	membrane;mitochondrion	catalytic activity;metal ion binding	Pf13085, Pf13183, Pf13534	89.1	96.3	83	1.08081	0.931538	0.86189	0.551	131.462
A0A076KWH0	Succinic semialdehyde dehydrogenase OS=Nicotiana tabacum PE=2 SV=1	4.5977	2	3	2	522	55.65	7.56				metabolic process		catalytic activity	Pf00171	76.2	121.2	100.2	1.59055	1.31496	0.826733	0.241	96.6667
B1Q3F7	Succinic semialdehyde reductase isofom2 OS=Solanum lycopersicum GN=LeSSR2 PE=2 SV=1	8.81543	2	7	2	363	38.257	8.19	100147725	SSR2	3	metabolic process		catalytic activity;nucleotide binding	Pf03446, Pf03807, Pf14833	74.1	121.4	100.4	1.63833	1.35493	0.827018	0.35	259.103
A0A097BTX5	Succinyl-CoA ligase subunit beta OS=Nicotiana tabacum PE=2 SV=1	15.4394	4	11	2	421	45.142	5.72				metabolic process		catalytic activity;metal ion binding;nucleotide binding	Pf00549, Pf01071, Pf08442	130.3	56.3	64.2	0.43208	0.492709	1.14032	0.719	266.52
O82802	Sulfite reductase 1 [ferredoxin], chloroplastic OS=Nicotiana tabacum GN=SIR1 PE=1 SV=1	13.9971	9	24	2	693	77.914	9.04				cell organization and biogenesis;metabolic process;regulation of biological process		catalytic activity;DNA binding;metal ion binding	Pf01077, Pf03460	101.9	81.7	77.4	0.801766	0.759568	0.947368	1.006	403.821
K4BIU3	Superoxide dismutase OS=Solanum lycopersicum GN=Solyc03g095180.2 PE=4 SV=1	10.231	4	23	2	303	34.554	5.55	101248277	LOC101248277; Solyc03g095180.2	3	metabolic process;response to stimulus		antioxidant activity;catalytic activity;metal ion binding	Pf00081, Pf02777	89.8	148.4	99.1	1.65256	1.10356	0.66779	1.894	436.347
A0A076FU21	Temperature-induced lipocalin OS=Nicotiana tabacum GN=TIL PE=2 SV=1	9.72973	2	12	2	185	21.356	7.43				transport		transporter activity	Pf00061, Pf08212	132.7	59.1	72.6	0.445365	0.547099	1.22843	0.874	217.823
M1B2B9	Thioredoxin reductase OS=Solanum tuberosum GN=PGSC0003DMG400013638 PE=3 SV=1	20.7084	5	32	2	367	39.105	7.33	102599463	LOC102599463; PGSC0003DMG400013638	2	metabolic process;response to stimulus	cytoplasm	antioxidant activity;catalytic activity;nucleotide binding	Pf00070, Pf07992, Pf13738	62.5	128.7	116.2	2.0592	1.8592	0.902875	3.467	836.532
V9HZ07	Trigger factor 1 (Fragment) OS=Nicotiana attenuata PE=2 SV=1	29.3233	3	7	2	133	15.062	4.74				metabolic process;transport			Pf05698, Pf09551	142.9	72.5	77.6	0.507348	0.543037	1.07034	2.981	178.333
Q3HVL7	TSJT1-like protein OS=Solanum tuberosum GN=PGSC0003DMG400022388 PE=2 SV=1	9.27419	3	6	2	248	27.658	5.48	102596316	LOC102596316; PGSC0003DMG400022388	2	metabolic process			Pf00310, Pf12481, Pf13522, Pf13537	77.1	105.9	101.9	1.37354	1.32166	0.962229	1.276	125.037
P80969	Tyramine N-feruloyltransferase 10/30 OS=Nicotiana tabacum GN=THT10 PE=1 SV=2	8.84956	2	5	2	226	25.959	6.24				metabolic process	cytoplasm	catalytic activity	Pf00583	25.6	96.3	139.9	3.76172	5.46484	1.45275	0.585	91.7983
K4CH48	Ubiquitin carboxyl-terminal hydrolase OS=Solanum lycopersicum GN=Solyc07g063650.2 PE=3 SV=1	3.1211	2	4	2	801	88.864	5.06	101266142	LOC101266142; Solyc07g063650.2	7	cell growth;metabolic process	cytosol	catalytic activity;metal ion binding;protein binding	Pf00443, Pf00627, Pf02148, Pf13423	115.6	89.8	81.6	0.776817	0.705882	0.908686	0.113	115.81
Q8W3Z7	UDP-glucose pyrophosphorylase (Fragment) OS=Nicotiana tabacum GN=NtUGPase PE=2 SV=1	23.6702	8	22	2	376	41.001	7.4				metabolic process		catalytic activity	Pf01704	97.6	110.9	99.3	1.13627	1.01742	0.895401	1.683	497.177
K4C3D3	Uncharacterized protein OS=Solanum lycopersicum GN=ACI29 PE=4 SV=1	23.5808	5	21	2	229	25.971	10.43		Solyc06g007520.2	6	metabolic process	ribosome	structural molecule activity	Pf00252	82.4	122	110	1.48058	1.33495	0.901639	3.217	689.493
K4CU67	Uncharacterized protein OS=Solanum lycopersicum GN=ADH3 PE=4 SV=1	9.94764	2	3	2	382	41.261	8.05		Solyc09g064370.2	9	metabolic process		catalytic activity;metal ion binding	Pf00107, Pf08240	88.7	87.2	63.6	0.983089	0.717024	0.729358	0.369	61.4033
K4CNG6	Uncharacterized protein OS=Solanum lycopersicum GN=Rab1A PE=3 SV=1	35.468	5	20	2	203	22.489	5.68	544010	Rab1A; Solyc08g078070.2	8	cell growth;cell organization and biogenesis;development;regulation of biological process;response to stimulus;transport	cytosol;membrane;vacuole	nucleotide binding	Pf00025, Pf00071, Pf04670, Pf08477, Pf09439	86.4	92.1	87.8	1.06597	1.0162	0.953312	2.384	628.484
K4ARQ3	Uncharacterized protein OS=Solanum lycopersicum GN=Solyc00g140060.2 PE=4 SV=1	6.39269	2	5	2	219	24.029	7.36	101250292	LOC101250292		metabolic process	cytoplasm;membrane;ribosome;vacuole	catalytic activity	Pf07362	97.4	100.2	104.5	1.02875	1.0729	1.04291	0.585	108.17
K4ASL5	Uncharacterized protein OS=Solanum lycopersicum GN=Solyc01g006490.2 PE=3 SV=1	5.57491	3	4	2	574	64.216	5.36	101266256	LOC101266256; Solyc01g006490.2	1				Pf02696	71.9	118.2	102.5	1.64395	1.42559	0.867174	0.205	63.7824
K4ATJ2	Uncharacterized protein OS=Solanum lycopersicum GN=Solyc01g009970.2 PE=4 SV=1	4.92754	2	6	2	345	38.379	6.79	101263344	LOC101263344; Solyc01g009970.2	1	metabolic process		catalytic activity	Pf04909	93.9	118.9	107.8	1.26624	1.14803	0.906644	0.668	70.449
K4ATQ3	Uncharacterized protein OS=Solanum lycopersicum GN=Solyc01g010590.2 PE=3 SV=1	7.89474	2	4	2	228	25.747	8.53	101253307	LOC101253307; Solyc01g010590.2	1	metabolic process	endosome;Golgi	catalytic activity	Pf00160	61.8	124.4	121.1	2.01294	1.95955	0.973473	0.334	72.04
K4AWQ1	Uncharacterized protein OS=Solanum lycopersicum GN=Solyc01g066480.2 PE=4 SV=1	6.94981	2	6	2	259	27.869	8.53	101258990	LOC101258990; Solyc01g066480.2	1	metabolic process	mitochondrion	catalytic activity;metal ion binding	Pf01557	81.4	105.3	108.6	1.29361	1.33415	1.03134	0.54	100.392
K4AWX8	Uncharacterized protein OS=Solanum lycopersicum GN=Solyc01g067290.2 PE=4 SV=1	5.71429	2	5	2	420	46.057	6.8	101247061	LOC101247061; Solyc01g067290.2	1	metabolic process	membrane	catalytic activity	Pf01073, Pf01370, Pf05368, Pf07993, Pf13460	131.6	82.5	68.4	0.6269	0.519757	0.829091	0.369	87.26
K4AYQ1	Uncharacterized protein OS=Solanum lycopersicum GN=Solyc01g088610.2 PE=3 SV=1	13.3333	2	13	2	135	14.921	7.99	101246758	LOC101246758; Solyc01g088610.2	1	metabolic process	cytoplasm		Pf00166	122	84.1	99.3	0.689344	0.813934	1.18074	1.371	190.67
K4AZ53	Uncharacterized protein OS=Solanum lycopersicum GN=Solyc01g091130.2 PE=4 SV=1	3.56564	2	2	2	617	69.402	7.49	101249301	LOC101249301; Solyc01g091130.2	1	metabolic process		catalytic activity		97.9	103.4	108.9	1.05618	1.11236	1.05319	0.129	39.39
K4AZQ1	Uncharacterized protein OS=Solanum lycopersicum GN=Solyc01g095120.2 PE=4 SV=1	3.6965	2	3	2	514	57.232	7.5	101249860	LOC101249860; Solyc01g095120.2	1	metabolic process	cytosol;vacuole	catalytic activity	Pf00561, Pf12697	71.1	109.3	99.6	1.53727	1.40084	0.911253	0.155	44.4517
K4B0G7	Uncharacterized protein OS=Solanum lycopersicum GN=Solyc01g097800.2 PE=4 SV=1	11.2179	2	4	2	312	34.079	5.43	101268721	LOC101268721; Solyc01g097800.2	1	metabolic process;response to stimulus	cytoplasm;cytosol;nucleus	catalytic activity	Pf02311, Pf02502, Pf07883, Pf12973	85.3	108.7	101.5	1.27433	1.18992	0.933763	0.413	90.91
K4B0S5	Uncharacterized protein OS=Solanum lycopersicum GN=Solyc01g098880.2 PE=3 SV=1	2.46085	2	2	2	447	50.946	6.64	101263161	LOC101263161; Solyc01g098880.2	1	metabolic process	cytoplasm	catalytic activity;nucleotide binding	Pf00587, Pf02403	135.9	62.1	71.8	0.456954	0.52833	1.1562	0.166	40.53
K4B0U8	Uncharacterized protein OS=Solanum lycopersicum GN=Solyc01g099110.2 PE=4 SV=1	2.40453	2	4	2	707	78.646	6.43	101268433	LOC101268433; Solyc01g099110.2	1	metabolic process		catalytic activity;metal ion binding	Pf00557, Pf01321	116.7	91.2	94.7	0.781491	0.811482	1.03838	0.184	94.0079
K4B124	Uncharacterized protein OS=Solanum lycopersicum GN=Solyc01g099900.2 PE=4 SV=1	22.4599	4	17	2	187	20.75	10.76	104644735	LOC104644735; Solyc01g099900.2	1	metabolic process	cytosol;membrane;ribosome;vacuole	structural molecule activity	Pf00828	101.6	90.7	116.8	0.892717	1.14961	1.28776	5.31	334.048
K4B1D4	Uncharacterized protein OS=Solanum lycopersicum GN=Solyc01g101040.2 PE=4 SV=1	5.91017	2	3	2	423	46.453	5.48	101261460	LOC101261460; Solyc01g101040.2	1			nucleotide binding	Pf08442	83.7	88.6	113.5	1.05854	1.35603	1.28104	0.245	117.173
K4B1J4	Uncharacterized protein OS=Solanum lycopersicum GN=Solyc01g102660.2 PE=3 SV=1	9.00901	2	4	2	222	25.26	5.66		Solyc01g102660.2	1	metabolic process	cytoplasm	catalytic activity;protein binding	Pf00043, Pf02798, Pf13409, Pf13417	75.1	110.7	106.7	1.47403	1.42077	0.963866	0.778	146.064
K4B1S7	Uncharacterized protein OS=Solanum lycopersicum GN=Solyc01g103510.2 PE=3 SV=1	22.3476	13	54	2	443	50.557	10.08		Solyc01g103510.2	1	metabolic process	cytosol;membrane;ribosome;vacuole	structural molecule activity	Pf00297, Pf05731	69.1	137	119.8	1.98263	1.73372	0.874453	4.233	754.428
K4B287	Uncharacterized protein OS=Solanum lycopersicum GN=Solyc01g105170.2 PE=4 SV=1	15.812	2	7	2	234	24.136	8.03		Solyc01g105170.2	1	transport		metal ion binding	Pf00403	95.5	113.3	107.8	1.18639	1.1288	0.951456	1.031	163.382
K4B2H0	Uncharacterized protein OS=Solanum lycopersicum GN=Solyc01g106010.2 PE=3 SV=1	5.42005	2	4	2	369	40.016	6.13		Solyc01g106010.2	1	metabolic process		catalytic activity	Pf00316, Pf00459	99.4	98.9	94.9	0.99497	0.954728	0.959555	0.413	106.195
K4B2H7	Uncharacterized protein OS=Solanum lycopersicum GN=Solyc01g106090.2 PE=4 SV=1	5.57491	2	9	2	287	32.345	8.7	101264980	LOC101264980; Solyc01g106090.2	1	cell organization and biogenesis;metabolic process	membrane	metal ion binding	Pf01789	79.1	155.5	99.9	1.96587	1.26296	0.642444	0.233	159.216
K4B2U4	Uncharacterized protein OS=Solanum lycopersicum GN=Solyc01g107270.2 PE=4 SV=1	6.22656	10	37	2	1333	146.262	6.25		Solyc01g107270.2	1	metabolic process		catalytic activity	Pf00586, Pf02769, Pf13507	90.5	115.2	107.4	1.27293	1.18674	0.932292	0.905	761.748
K4B3W9	Uncharacterized protein OS=Solanum lycopersicum GN=Solyc01g111060.2 PE=4 SV=1	7.79221	4	16	2	308	32.73	5.41		Solyc01g111060.2	1	metabolic process;reproduction	cytosol;membrane	catalytic activity	Pf01048	77	137.4	108.5	1.78442	1.40909	0.789665	1.581	330.472
K4B3Y3	Uncharacterized protein OS=Solanum lycopersicum GN=Solyc01g111210.2 PE=4 SV=1	2.37203	2	2	2	801	87.625	6.49		Solyc01g111210.2	1	metabolic process		catalytic activity	Pf01190, Pf01425	107.8	105.2	99	0.975881	0.918367	0.941065	0.113	15.79
K4B402	Uncharacterized protein OS=Solanum lycopersicum GN=Solyc01g111400.2 PE=4 SV=1	3.23834	2	3	2	772	81.727	8.59	101261760	LOC101261760; Solyc01g111400.2	1	metabolic process	membrane	catalytic activity	Pf00082, Pf02225, Pf05922	92	92	88	1	0.956522	0.956522	0.25	82.3467
K4B425	Uncharacterized protein OS=Solanum lycopersicum GN=Solyc01g111630.2 PE=3 SV=1	12.6943	5	42	2	386	42.232	7.01	100191110	HPR; LOC100191110; Solyc01g111630.2	1	metabolic process		catalytic activity;nucleotide binding	Pf00389, Pf02826	98.5	106	103.8	1.07614	1.05381	0.979245	1.894	1338.7
K4B5N7	Uncharacterized protein OS=Solanum lycopersicum GN=Solyc02g032940.2 PE=3 SV=1	8.20896	3	7	2	536	58.4	5.94		Solyc02g032940.2	2	metabolic process;response to stimulus	cytosol	catalytic activity	Pf00026, Pf03489, Pf05184, Pf14543	170.6	95.9	73.5	0.562134	0.430832	0.766423	0.334	102.401
K4B6D2	Uncharacterized protein OS=Solanum lycopersicum GN=Solyc02g062430.2 PE=4 SV=1	3.73514	2	3	2	589	65.435	7.23		Solyc02g062430.2	2	metabolic process		catalytic activity;nucleotide binding	Pf01565, Pf02913	117.1	95.9	98.7	0.818958	0.842869	1.0292	0.212	46.31
K4B6T0	Uncharacterized protein OS=Solanum lycopersicum GN=Solyc02g064950.2 PE=4 SV=1	22.4576	5	21	2	236	25.87	8.59	101267675	LOC101267675; Solyc02g064950.2	2			nucleotide binding	Pf00478, Pf00571	164.6	47.6	58.1	0.289186	0.352977	1.22059	2.652	544.96
K4B6V2	Uncharacterized protein OS=Solanum lycopersicum GN=Solyc02g065170.2 PE=4 SV=1	5.00928	2	3	2	539	60.177	9.25	101263571	LOC101263571; Solyc02g065170.2	2	metabolic process;response to stimulus		catalytic activity;metal ion binding	Pf00394, Pf07731, Pf07732	113	131.8	93.8	1.16637	0.830088	0.711684	0.292	68.0267
K4B7F9	Uncharacterized protein OS=Solanum lycopersicum GN=Solyc02g068270.2 PE=4 SV=1	6.97674	2	2	2	215	23.475	6.58	101244833	LOC101244833; Solyc02g068270.2	2		membrane			179	37.3	47.9	0.20838	0.267598	1.28418	0.778	40.74
K4B7Q7	Uncharacterized protein OS=Solanum lycopersicum GN=Solyc02g069250.2 PE=3 SV=1	3.05556	2	5	2	360	39.537	7.97	101249426	LOC101249426; Solyc02g069250.2	2	metabolic process;response to stimulus		catalytic activity;metal ion binding	Pf00107, Pf08240	46.1	210.9	74.9	4.57484	1.62473	0.355145	0.413	113.89
K4B8J2	Uncharacterized protein OS=Solanum lycopersicum GN=Solyc02g072180.2 PE=3 SV=1	27.6498	6	14	2	217	24.072	5.69	101254053	LOC101254053; Solyc02g072180.2	2	regulation of biological process;response to stimulus;transport	cytosol;membrane;nucleus;vacuole	nucleotide binding	Pf00025, Pf00071, Pf01926, Pf04670, Pf08477, Pf13401	138.3	64.3	77.6	0.464931	0.561099	1.20684	1.738	388.718
K4B8W8	Uncharacterized protein OS=Solanum lycopersicum GN=Solyc02g077420.2 PE=4 SV=1	4.47761	2	2	2	402	45.205	6.21	101243853	LOC101243853; Solyc02g077420.2	2	metabolic process		catalytic activity	Pf01764	28	267.9	61.3	9.56786	2.18929	0.228817	0.194	54.2575
K4B9P8	Uncharacterized protein OS=Solanum lycopersicum GN=Solyc02g080270.2 PE=4 SV=1	9.48905	2	2	2	274	30.628	6.79	101258121	LOC101258121; Solyc02g080270.2	2				Pf03997	79	95.8	77	1.21266	0.974684	0.803758	0.311	72.57
K4B9S5	Uncharacterized protein OS=Solanum lycopersicum GN=Solyc02g080540.1 PE=3 SV=1	13.7931	6	103	2	377	41.467	8.02	101253342	LOC101253342; Solyc02g080540.1	2	metabolic process;transport		catalytic activity;transporter activity	Pf00231	154.4	52.1	84.8	0.337435	0.549223	1.62764	18.307	2331.03
K4B9Y4	Uncharacterized protein OS=Solanum lycopersicum GN=Solyc02g081140.2 PE=4 SV=1	10.8553	3	8	2	304	32.696	6.1	101244442	LOC101244442; Solyc02g081140.2	2			protein binding	Pf00789, Pf08059	81.3	121.3	99.7	1.492	1.22632	0.821929	1.336	134.875
K4BA67	Uncharacterized protein OS=Solanum lycopersicum GN=Solyc02g081970.2 PE=4 SV=1	3.29154	2	4	2	638	71.063	5.68	101250358	LOC101250358; Solyc02g081970.2	2			metal ion binding	Pf12947	48.9	163.1	92.7	3.33538	1.89571	0.568363	0.116	52.35
K4BAF0	Uncharacterized protein OS=Solanum lycopersicum GN=Solyc02g082800.2 PE=4 SV=1	13.7432	6	39	2	553	58.6	4.97	101255157	LOC101255157; Solyc02g082800.2	2			protein binding	Pf00240, Pf00627, Pf11976, Pf14560	89.8	118.5	94.3	1.3196	1.05011	0.795781	6.499	967.004
K4BAL4	Uncharacterized protein OS=Solanum lycopersicum GN=Solyc02g083460.2 PE=3 SV=1	1.66976	2	2	2	539	58.057	5.83	101268338	LOC101268338; Solyc02g083460.2	2	metabolic process		catalytic activity	Pf00026, Pf14541, Pf14543	52.5	122.6	113.6	2.33524	2.16381	0.926591	0.212	25.62
K4BAN9	Uncharacterized protein OS=Solanum lycopersicum GN=Solyc02g083710.2 PE=4 SV=1	5.45906	2	6	2	403	42.667	4.6	101263071	LOC101263071; Solyc02g083710.2	2	cell growth;cell organization and biogenesis;development;metabolic process;regulation of biological process;response to stimulus	cytosol;membrane	protein binding;receptor activity;signal transducer activity	Pf13519	70.6	141	101.3	1.99717	1.43484	0.71844	0.896	124.11
K4BBG4	Uncharacterized protein OS=Solanum lycopersicum GN=Solyc02g086560.2 PE=4 SV=1	13.1068	2	2	2	206	22.607	8.27	101257032	LOC101257032; Solyc02g086560.2	2	metabolic process;response to stimulus		catalytic activity;metal ion binding	Pf01903	119.1	80.5	99.9	0.675903	0.838791	1.24099	0.425	95.95
K4BBH8	Uncharacterized protein OS=Solanum lycopersicum GN=Solyc02g086710.2 PE=4 SV=1	4.158	2	2	2	481	52.375	7.25	101253550	LOC101253550; Solyc02g086710.2	2	metabolic process	membrane	catalytic activity;nucleotide binding	Pf07992	107.2	95.7	77	0.892724	0.718284	0.804598	0.222	43.81
K4BBJ0	Uncharacterized protein OS=Solanum lycopersicum GN=Solyc02g086830.2 PE=4 SV=1	5.5814	2	3	2	430	45.534	7.3	101250650	LOC101250650; Solyc02g086830.2	2	metabolic process	nucleus	catalytic activity;protein binding	Pf00089, Pf13180, Pf13365	124.4	84	74	0.675241	0.594855	0.880952	0.222	101.107
K4BBN0	Uncharacterized protein OS=Solanum lycopersicum GN=Solyc02g087230.2 PE=4 SV=1	12.7517	2	3	2	149	16.837	6.87	101268336	LOC101268336; Solyc02g087230.2	2	metabolic process		catalytic activity;metal ion binding	Pf02943	108.1	92.7	118	0.857539	1.09158	1.27292	0.468	64.5542
K4BCC3	Uncharacterized protein OS=Solanum lycopersicum GN=Solyc02g089720.1 PE=4 SV=1	3.75522	2	4	2	719	80.091	6.83	101265981	LOC101265981; Solyc02g089720.1	2	metabolic process		catalytic activity	Pf03639	64.9	116.7	105.4	1.79815	1.62404	0.903171	0.166	135.48
K4BCT2	Uncharacterized protein OS=Solanum lycopersicum GN=Solyc02g091340.2 PE=4 SV=1	3.23625	2	2	2	309	33.947	6.42		Solyc02g091340.2	2	cell differentiation;metabolic process;response to stimulus	cytosol	catalytic activity	Pf00294, Pf08543	71.6	127.3	112.1	1.77793	1.56564	0.880597	0.334	35.44
K4BDC7	Uncharacterized protein OS=Solanum lycopersicum GN=Solyc02g093310.2 PE=4 SV=1	5.33981	2	4	2	412	45.42	7.59	101263954	LOC101263954; Solyc02g093310.2	2	metabolic process	membrane	catalytic activity	Pf00388	80.9	129	104.2	1.59456	1.28801	0.807752	0.202	94.52
K4BEB0	Uncharacterized protein OS=Solanum lycopersicum GN=Solyc03g006870.2 PE=4 SV=1	13.2911	8	31	2	632	68.692	5.99	101267287	LOC101267287; Solyc03g006870.2	3	metabolic process;response to stimulus	extracellular	catalytic activity;metal ion binding	Pf00408, Pf02878, Pf02879, Pf02880	140.7	64.4	88.4	0.457711	0.628287	1.37267	1.412	811.694
K4BEU4	Uncharacterized protein OS=Solanum lycopersicum GN=Solyc03g019720.2 PE=4 SV=1	5.55556	2	3	2	252	27.521	8.27	101249243	LOC101249243; Solyc03g019720.2	3	response to stimulus	membrane			113.9	81.5	78.2	0.71554	0.686567	0.959509	0.389	51.0533
K4BG20	Uncharacterized protein OS=Solanum lycopersicum GN=Solyc03g044000.1 PE=3 SV=1	26.7123	6	21	2	146	16.687	10.81	101267290	LOC101267290; Solyc03g044000.1	3	metabolic process;response to stimulus	cytosol;membrane;nucleus;ribosome	structural molecule activity	Pf00467	107.6	62.5	98.3	0.580855	0.913569	1.5728	18.307	341.441
K4BIC8	Uncharacterized protein OS=Solanum lycopersicum GN=Solyc03g083520.2 PE=4 SV=1	52.6667	8	35	2	150	16.917	5.05		Solyc03g083520.2	3			metal ion binding	Pf00036, Pf13405, Pf13499, Pf13833	109.9	74.9	112.7	0.681529	1.02548	1.50467	19.309	806.152
K4BIU4	Uncharacterized protein OS=Solanum lycopersicum GN=Solyc03g095190.2 PE=3 SV=1	34.5	3	27	2	200	21.41	6.19	101248556	LOC101248556; Solyc03g095190.2	3	metabolic process;transport		catalytic activity;transporter activity	Pf02823	82.9	96.1	108.2	1.15923	1.30519	1.12591	22.714	723.25
K4BJA3	Uncharacterized protein OS=Solanum lycopersicum GN=Solyc03g096850.2 PE=4 SV=1	9.35252	2	10	2	278	28.992	9.57	101255672	LOC101255672; Solyc03g096850.2	3		membrane	metal ion binding;protein binding	Pf00301, Pf00595, Pf13180	149.5	54.1	45.1	0.361873	0.301672	0.833641	0.438	119.54
K4BJY3	Uncharacterized protein OS=Solanum lycopersicum GN=Solyc03g111200.2 PE=3 SV=1	17.623	5	14	2	244	26.653	8.38	101265630	LOC101265630; Solyc03g111200.2	3	metabolic process		catalytic activity;nucleotide binding	Pf00406, Pf05191, Pf13207	128.9	57.3	55.4	0.444531	0.429791	0.966841	1.637	369.807
K4BKH7	Uncharacterized protein OS=Solanum lycopersicum GN=Solyc03g113240.2 PE=4 SV=1	13.1579	2	6	2	190	20.21	8.29	101245045	LOC101245045; Solyc03g113240.2	3		membrane		Pf06549	179.5	18.9	29.2	0.105292	0.162674	1.54497	0.995	210.05
K4BL78	Uncharacterized protein OS=Solanum lycopersicum GN=Solyc03g115760.2 PE=4 SV=1	13.5747	2	3	2	221	25.121	9.28	101266321	LOC101266321; Solyc03g115760.2	3	response to stimulus;transport	endosome;Golgi;membrane;vacuole	protein binding	Pf03908, Pf05008, Pf12352	85.4	111.9	86.6	1.3103	1.01405	0.773905	0.359	87.1867
K4BLV4	Uncharacterized protein OS=Solanum lycopersicum GN=Solyc03g118030.2 PE=4 SV=1	3.36538	2	4	2	624	68.73	7.01	101246703	LOC101246703; Solyc03g118030.2	3	metabolic process		catalytic activity	Pf01425	71.5	143.8	104.2	2.01119	1.45734	0.724618	0.129	67.9
K4BM77	Uncharacterized protein OS=Solanum lycopersicum GN=Solyc03g119280.2 PE=3 SV=1	4.7619	2	3	2	504	56.82	7.94	101267504	LOC101267504; Solyc03g119280.2	3	metabolic process	cytoplasm;mitochondrion	catalytic activity;nucleotide binding	Pf00587, Pf01409, Pf03129, Pf13393	167.7	59.3	68.3	0.353608	0.407275	1.15177	0.16	50.7633
K4BMF8	Uncharacterized protein OS=Solanum lycopersicum GN=Solyc03g120090.1 PE=4 SV=1	12.1311	3	5	2	305	32.711	5.43	101251664	LOC101251664; Solyc03g120090.1	3	metabolic process	cytosol	catalytic activity;protein binding	Pf01680, Pf02581, Pf05690	89.6	100.2	107.8	1.1183	1.20312	1.07585	0.585	67.31
K4BMJ4	Uncharacterized protein OS=Solanum lycopersicum GN=Solyc03g120450.2 PE=3 SV=1	7.86802	2	3	2	394	43.469	6.25	101244469	LOC101244469; Solyc03g120450.2	3	metabolic process;regulation of biological process;response to stimulus	cytoplasm;cytosol	catalytic activity	Pf00155, Pf01053, Pf01212	59.8	140.2	111.8	2.34448	1.86957	0.797432	0.212	57.4433
K4BMK3	Uncharacterized protein OS=Solanum lycopersicum GN=Solyc03g120540.2 PE=4 SV=1	10.1523	2	3	2	197	21.659	6.2	101267390	LOC101267390; Solyc03g120540.2	3	metabolic process		catalytic activity	Pf00857	81.9	94.5	106.1	1.15385	1.29548	1.12275	0.389	50.44
K4BML2	Uncharacterized protein OS=Solanum lycopersicum GN=Solyc03g120630.2 PE=3 SV=1	11.3924	2	10	2	158	17.665	10.24		Solyc03g120630.2	3	cell organization and biogenesis;metabolic process	ribosome	structural molecule activity	Pf00366	182.5	47.9	82.7	0.262466	0.453151	1.72651	0.585	120.72
K4BMZ4	Uncharacterized protein OS=Solanum lycopersicum GN=Solyc03g121960.2 PE=4 SV=1	3.74251	2	4	2	668	74.232	7.02	101259322	LOC101259322; Solyc03g121960.2	3	metabolic process		catalytic activity	Pf02450	125	53.6	71.1	0.4288	0.5688	1.32649	0.136	161.865
K4BNN0	Uncharacterized protein OS=Solanum lycopersicum GN=Solyc04g007230.2 PE=4 SV=1	4.02477	2	2	2	323	35.609	7.74	101254375	LOC101254375; Solyc04g007230.2	4				Pf03398	60.1	147.6	116	2.45591	1.93012	0.785908	0.212	44.52
K4BP98	Uncharacterized protein OS=Solanum lycopersicum GN=Solyc04g009420.2 PE=4 SV=1	11.8852	2	12	2	244	26.533	7.28	101259233	LOC101259233; Solyc04g009420.2	4	metabolic process		metal ion binding	Pf01789	122.1	88.1	102.4	0.72154	0.838657	1.16232	1.683	354.853
K4BPA9	Uncharacterized protein OS=Solanum lycopersicum GN=Solyc04g009530.2 PE=4 SV=1	6.44068	2	3	2	295	33.507	6.7	101256964	LOC101256964; Solyc04g009530.2	4	metabolic process		protein binding	Pf13409, Pf13410, Pf13417	107.5	122.1	97.8	1.13581	0.909767	0.800983	0.233	78.31
K4BPH8	Uncharacterized protein OS=Solanum lycopersicum GN=Solyc04g010240.2 PE=3 SV=1	26.8293	4	6	2	123	14.28	10.81	101267698	LOC101267698; Solyc04g010240.2	4	metabolic process	ribosome	structural molecule activity	Pf00831	111.6	92	114.6	0.824373	1.02688	1.24565	4.179	98.8693
K4BPJ2	Uncharacterized protein OS=Solanum lycopersicum GN=Solyc04g011370.2 PE=4 SV=1	24.4755	2	3	2	143	16.483	5.44	101264416	LOC101264416; Solyc04g011370.2	4	cell organization and biogenesis;defense response;regulation of biological process;response to stimulus	cytoplasm;cytoskeleton;cytosol;membrane;mitochondrion;nucleus	protein binding	Pf00241	160.3	43.3	62.4	0.270119	0.38927	1.44111	1.371	74.8369
K4BQ85	Uncharacterized protein OS=Solanum lycopersicum GN=Solyc04g015830.2 PE=4 SV=1	8.43882	6	14	2	948	103.948	5.76	101268090	LOC101268090; Solyc04g015830.2	4	cell organization and biogenesis		protein binding	Pf00626, Pf02209	83.4	99.7	68.7	1.19544	0.823741	0.689067	0.314	342.704
K4BQD6	Uncharacterized protein OS=Solanum lycopersicum GN=Solyc04g016360.2 PE=4 SV=1	8.80282	2	10	2	284	32.069	6.28	101260331	LOC101260331; Solyc04g016360.2	4	metabolic process;response to stimulus	extracellular	catalytic activity	Pf00326, Pf00756, Pf01738	118.5	73	81.6	0.616034	0.688608	1.11781	0.468	501.39
K4BRZ6	Uncharacterized protein OS=Solanum lycopersicum GN=Solyc04g050240.2 PE=4 SV=1	9.30233	2	2	2	301	34.913	7.42	101247715	LOC101247715; Solyc04g050240.2	4		endosome		Pf03643	71.3	130.3	106.9	1.82749	1.4993	0.820414	0.259	100.74
K4BSR7	Uncharacterized protein OS=Solanum lycopersicum GN=Solyc04g055200.2 PE=4 SV=1	5.01253	2	3	2	399	45.029	6.99		Solyc04g055200.2	4	metabolic process	cytosol	catalytic activity	Pf00733	118.9	74	75.6	0.622372	0.635828	1.02162	0.202	61.44
K4BSV7	Uncharacterized protein OS=Solanum lycopersicum GN=Solyc04g056590.2 PE=4 SV=1	3.31263	2	5	2	483	52.554	6.73	101252770	LOC101252770; Solyc04g056590.2	4	metabolic process		catalytic activity	Pf00026, Pf14541, Pf14543	82.3	130.5	95.8	1.58566	1.16403	0.7341	0.318	119.24
K4BT18	Uncharacterized protein OS=Solanum lycopersicum GN=Solyc04g063280.2 PE=4 SV=1	3.59168	2	6	2	529	57.759	5.34	101253775	LOC101253775; Solyc04g063280.2	4	transport			Pf00790, Pf03127	48	144.8	100.5	3.01667	2.09375	0.694061	0.292	119.14
K4BT25	Uncharacterized protein OS=Solanum lycopersicum GN=Solyc04g063350.2 PE=4 SV=1	4.44915	2	3	2	472	52.787	6.18	101254378	LOC101254378; Solyc04g063350.2	4	metabolic process		catalytic activity	Pf00456, Pf00676	141.5	69.8	100.5	0.493286	0.710247	1.43983	0.194	61.5367
K4BT41	Uncharacterized protein OS=Solanum lycopersicum GN=Solyc04g064500.2 PE=3 SV=1	6.51558	2	3	2	353	38.368	4.94	101256968	LOC101256968; Solyc04g064500.2	4	metabolic process		catalytic activity;metal ion binding	Pf00481, Pf13672							0.413	156.306
K4BUA0	Uncharacterized protein OS=Solanum lycopersicum GN=Solyc04g076620.2 PE=4 SV=1	1.08333	2	5	2	3600	397.005	5.14		Solyc04g076620.2	4	metabolic process		catalytic activity;protein binding	Pf00627, Pf00632, Pf06012, Pf06025, Pf14377	72	150	105.2	2.08333	1.46111	0.701333	0.047	290.45
K4BUX5	Uncharacterized protein OS=Solanum lycopersicum GN=Solyc04g078910.2 PE=4 SV=1	11.1628	2	3	2	215	24.486	6.23	101260340	LOC101260340; Solyc04g078910.2	4	cellular homeostasis;metabolic process;regulation of biological process		catalytic activity	Pf00085, Pf13098	143.2	74	87.7	0.51676	0.61243	1.18514	0.389	99.25
K4BVY3	Uncharacterized protein OS=Solanum lycopersicum GN=Solyc04g082560.2 PE=4 SV=1	2.60586	2	2	2	1228	134.607	5.68		Solyc04g082560.2	4		membrane	metal ion binding;protein binding	Pf09770, Pf12763, Pf13499, Pf15011	79.9	121.9	90.6	1.52566	1.13392	0.743232	0.07	94.38
K4BW98	Uncharacterized protein OS=Solanum lycopersicum GN=Solyc05g005700.2 PE=3 SV=1	17.0132	8	58	2	529	57.805	7.93	101254485	LOC101254485; Solyc05g005700.2	5	metabolic process		catalytic activity	Pf00171	91.3	126.2	98.2	1.38226	1.07558	0.77813	1.656	2057.34
K4C0M5	Uncharacterized protein OS=Solanum lycopersicum GN=Solyc05g043430.2 PE=4 SV=1	10.9091	2	26	2	220	23.814	6.39		Solyc05g043430.2	5	metabolic process;response to stimulus	cytosol	catalytic activity	Pf01738, Pf05448, Pf09752, Pf12695, Pf12697	45	139.6	134.6	3.10222	2.99111	0.964183	2.455	714.821
K4C227	Uncharacterized protein OS=Solanum lycopersicum GN=Solyc05g053470.2 PE=3 SV=1	27.3997	17	134	2	573	61.088	5.92	101263320	LOC101263320; Solyc05g053470.2	5	metabolic process	cytoplasm	nucleotide binding	Pf00118	110.7	59.8	79.4	0.540199	0.717254	1.32776	18.829	4083.88
K4C247	Uncharacterized protein OS=Solanum lycopersicum GN=Solyc05g053670.2 PE=3 SV=1	19.9029	5	42	2	206	23.546	10.54	101259442	LOC101259442; Solyc05g053670.2	5	metabolic process	cytosol;membrane;ribosome	structural molecule activity	Pf00572	73.6	143.3	113.5	1.94701	1.54212	0.792045	4.623	526.302
K4C285	Uncharacterized protein OS=Solanum lycopersicum GN=Solyc05g054060.2 PE=4 SV=1	8.1761	4	12	2	477	52.1	6.18	101250892	LOC101250892; Solyc05g054060.2	5	cell communication;cell organization and biogenesis;development;metabolic process;response to stimulus	cytosol;membrane	catalytic activity	Pf01704	99.1	102.6	103.5	1.03532	1.0444	1.00877	0.301	358.27
K4C2H1	Uncharacterized protein OS=Solanum lycopersicum GN=Solyc05g054940.2 PE=4 SV=1	8.18505	2	2	2	281	30.785	6.43		Solyc05g054940.2	5	metabolic process;response to stimulus		catalytic activity	Pf00795	69.8	143.7	105.4	2.05874	1.51003	0.733473	0.274	79.78
K4C2J4	Uncharacterized protein OS=Solanum lycopersicum GN=Solyc05g055170.2 PE=4 SV=1	8.11966	2	2	2	234	26.108	4.84	101248200	LOC101248200; Solyc05g055170.2	5	transport			Pf03357	94.5	61.6	56.9	0.651852	0.602116	0.923701	0.52	0
K4C2T9	Uncharacterized protein OS=Solanum lycopersicum GN=Solyc05g056150.2 PE=3 SV=1	7.05128	2	3	2	312	33.575	5.82	101250407	LOC101250407; Solyc05g056150.2	5	metabolic process		catalytic activity	Pf00977	104.2	104.1	98	0.99904	0.940499	0.941402	0.438	79.8
K4C321	Uncharacterized protein OS=Solanum lycopersicum GN=Solyc06g005370.2 PE=4 SV=1	6.07287	2	2	2	494	52.919	5.66	101251587	LOC101251587; Solyc06g005370.2	6	metabolic process	cytosol	catalytic activity;metal ion binding	Pf01676, Pf10143	102.2	93.6	88.1	0.915851	0.862035	0.941239	0.166	45.99
K4C392	Uncharacterized protein OS=Solanum lycopersicum GN=Solyc06g006100.2 PE=4 SV=1	4.25894	2	2	2	587	65.56	7.14	101265030	LOC101265030; Solyc06g006100.2	6	metabolic process		catalytic activity	Pf00425, Pf04715	123.5	74.1	73.6	0.6	0.595951	0.993252	0.125	45.86
K4C3A3	Uncharacterized protein OS=Solanum lycopersicum GN=Solyc06g007200.2 PE=4 SV=1	21.7949	9	35	2	390	42.777	6.48	101267411	LOC101267411; Solyc06g007200.2	6	cell proliferation;metabolic process;regulation of biological process	membrane	catalytic activity	Pf00557	108	82	95.3	0.759259	0.882407	1.1622	5.422	841.402
K4C3T4	Uncharacterized protein OS=Solanum lycopersicum GN=Solyc06g009040.2 PE=3 SV=1	19.3396	3	10	2	212	23.848	6.54	101256677	LOC101256677; Solyc06g009040.2	6			protein binding	Pf00043, Pf02798, Pf13409, Pf13410, Pf13417, Pf14497	76.2	120.7	114.5	1.58399	1.50262	0.948633	1.031	213.03
K4C455	Uncharacterized protein OS=Solanum lycopersicum GN=Solyc06g011280.2 PE=4 SV=1	7.02179	2	4	2	413	47.022	5.86	101248107	LOC101248107; Solyc06g011280.2	6	metabolic process		protein binding;RNA binding	Pf00043, Pf00647, Pf02798, Pf13409, Pf13410, Pf13417, Pf14497	120.7	85.9	58.8	0.711682	0.487158	0.684517	0.101	117.71
K4C5D0	Uncharacterized protein OS=Solanum lycopersicum GN=Solyc06g048840.2 PE=4 SV=1	26.8817	2	6	2	93	10.03	5.57	101252190	LOC101252190; Solyc06g048840.2	6				Pf00477	176.4	88	62.9	0.498866	0.356576	0.714773	2.162	187.247
K4C5M1	Uncharacterized protein OS=Solanum lycopersicum GN=Solyc06g050770.2 PE=4 SV=1	6.92042	2	3	2	289	32.519	5.16	101266422	LOC101266422; Solyc06g050770.2	6	transport	membrane;vacuole	protein binding	Pf13181, Pf13424, Pf14938	142	43.7	48.5	0.307746	0.341549	1.10984	0.222	86.24
K4C735	Uncharacterized protein OS=Solanum lycopersicum GN=Solyc06g063040.1 PE=4 SV=1	9.62099	2	10	2	343	37.999	6.33	101246540	LOC101246540; Solyc06g063040.1	6	metabolic process		catalytic activity;metal ion binding	Pf00107	50.2	156.3	103.7	3.11355	2.06574	0.663468	0.73	195.03
K4C7B1	Uncharacterized protein OS=Solanum lycopersicum GN=Solyc06g064810.2 PE=4 SV=1	13.1387	2	2	2	137	15.646	9.52	101253499	LOC101253499; Solyc06g064810.2	6		membrane			112	95.7	87.5	0.854464	0.78125	0.914316	0.668	52.18
K4C7H8	Uncharacterized protein OS=Solanum lycopersicum GN=Solyc06g065490.2 PE=4 SV=1	10.8	2	7	2	250	27.279	8.22	101248113	LOC101248113; Solyc06g065490.2	6	metabolic process		metal ion binding	Pf01789	139.1	57.5	69.2	0.413372	0.497484	1.20348	1.154	151.913
K4C7X1	Uncharacterized protein OS=Solanum lycopersicum GN=Solyc06g067960.2 PE=4 SV=1	15.2941	2	8	2	170	19.012	6.95	101266646	LOC101266646; Solyc06g067960.2	6	cellular homeostasis;metabolic process;regulation of biological process		catalytic activity	Pf00462	83.8	101	104.3	1.20525	1.24463	1.03267	1.031	209.321
K4C994	Uncharacterized protein OS=Solanum lycopersicum GN=Solyc06g073760.2 PE=4 SV=1	7.96178	5	8	2	628	68.775	8.19	101266643	LOC101266643; Solyc06g073760.2	6	metabolic process		catalytic activity	Pf00933, Pf01915	186.6	46.9	42.2	0.25134	0.226152	0.899787	0.468	142.796
K4CB09	Uncharacterized protein OS=Solanum lycopersicum GN=Solyc07g005370.2 PE=4 SV=1	13.4228	2	5	2	149	16.76	4.79	101262127	LOC101262127; Solyc07g005370.2	7	defense response;response to stimulus			Pf00407	100.8	109.2	113.5	1.08333	1.12599	1.03938	0.995	102.221
K4CBE9	Uncharacterized protein OS=Solanum lycopersicum GN=Solyc07g006780.2 PE=4 SV=1	4.83092	2	3	2	621	67.708	6.32		Solyc07g006780.2	7	metabolic process		catalytic activity	Pf00370, Pf01869, Pf02782	114.3	69.4	71.9	0.607174	0.629046	1.03602	0.25	96.37
K4CBJ8	Uncharacterized protein OS=Solanum lycopersicum GN=Solyc07g007280.2 PE=4 SV=1	11.9522	2	4	2	251	28.619	5.49	101254005	LOC101254005; Solyc07g007280.2	7	cell organization and biogenesis	membrane		Pf08847	161.2	69.3	91	0.429901	0.564516	1.31313	0.54	73.6333
K4CBV6	Uncharacterized protein OS=Solanum lycopersicum GN=Solyc07g008370.2 PE=3 SV=1	21.0744	5	32	2	242	27.988	9.95	101251486	LOC101251486; Solyc07g008370.2	7		cytosol;membrane;ribosome;vacuole		Pf00327, Pf08079	98.8	92.5	118.6	0.936235	1.2004	1.28216	3.437	433.401
K4CBW8	Uncharacterized protein OS=Solanum lycopersicum GN=Solyc07g008490.2 PE=4 SV=1	4.97925	2	3	2	482	51.658	6.05	101254606	LOC101254606; Solyc07g008490.2	7			RNA binding	Pf00013, Pf13014	112.2	91.5	78.6	0.815508	0.700535	0.859016	0.15	67.45
K4CC52	Uncharacterized protein OS=Solanum lycopersicum GN=Solyc07g009330.2 PE=4 SV=1	21.8487	2	2	2	119	11.817	4.46	101246068	LOC101246068; Solyc07g009330.2	7	metabolic process	cytosol;membrane;nucleus;ribosome	structural molecule activity		103.6	103	93.7	0.994208	0.90444	0.909709	2.162	45.44
K4CCF6	Uncharacterized protein OS=Solanum lycopersicum GN=Solyc07g017400.2 PE=4 SV=1	13.7072	2	3	2	321	35.783	4.44	101258384	LOC101258384; Solyc07g017400.2	7		cytoplasm;nucleus		Pf04683	98.3	105.3	98.3	1.07121	1	0.933523	0.585	130.64
K4CD10	Uncharacterized protein OS=Solanum lycopersicum GN=Solyc07g021540.2 PE=4 SV=1	8.01527	2	4	2	262	28.629	6.54	101253700	LOC101253700; Solyc07g021540.2	7				Pf02893	124.9	79.1	70.2	0.633307	0.56205	0.887484	0.638	163.2
K4CDS7	Uncharacterized protein OS=Solanum lycopersicum GN=Solyc07g039510.2 PE=4 SV=1	6.17761	2	3	2	259	28.976	6.19	101267625	LOC101267625; Solyc07g039510.2	7		cytosol		Pf00561, Pf08538, Pf08840, Pf12146, Pf12695, Pf12697	70.3	149.1	115.8	2.12091	1.64723	0.77666	0.311	47.6767
K4CG46	Uncharacterized protein OS=Solanum lycopersicum GN=Solyc07g055060.2 PE=3 SV=1	27.4896	26	141	2	964	109.877	6.15	101248407	LOC101248407; Solyc07g055060.2	7	metabolic process	cytosol;extracellular;membrane	catalytic activity	Pf00311	86.3	94	109	1.08922	1.26304	1.15957	3.303	3254.41
K4CGD5	Uncharacterized protein OS=Solanum lycopersicum GN=Solyc07g056020.2 PE=3 SV=1	3.46535	2	2	2	1010	107.946	6.92	101254504	LOC101254504; Solyc07g056020.2	7	metabolic process		catalytic activity;nucleotide binding;RNA binding	Pf00009, Pf02421, Pf03144, Pf04760, Pf11987	97.9	93.5	92.1	0.955056	0.940756	0.985027	0.08	42.83
K4CGL2	Uncharacterized protein OS=Solanum lycopersicum GN=Solyc07g061790.2 PE=4 SV=1	9.60699	2	22	2	229	25.833	7.72	101255814	LOC101255814; Solyc07g061790.2	7		membrane;vacuole		Pf04832	106.2	97.8	103.4	0.920904	0.973635	1.05726	1.371	209.215
K4CHE8	Uncharacterized protein OS=Solanum lycopersicum GN=Solyc07g064690.1 PE=4 SV=1	10.0775	2	3	2	129	13.921	6.28	101245381	LOC101245381; Solyc07g064690.1	7	cell organization and biogenesis;metabolic process	vacuole	catalytic activity;nucleotide binding	Pf09585	107.4	117.9	95.6	1.09777	0.89013	0.810857	1.683	56.7033
K4CIH7	Uncharacterized protein OS=Solanum lycopersicum GN=Solyc08g006890.2 PE=3 SV=1	10.4213	3	5	2	451	49.735	4.98	101254013	LOC101254013; Solyc08g006890.2	8	cell organization and biogenesis;metabolic process;response to stimulus	cytoplasm;cytoskeleton;cytosol;membrane;vacuole	catalytic activity;nucleotide binding;structural molecule activity	Pf00091, Pf03953	193	56.7	59.7	0.293782	0.309326	1.05291	0.334	233.74
K4CIR4	Uncharacterized protein OS=Solanum lycopersicum GN=Solyc08g007770.2 PE=4 SV=1	3.90879	2	3	2	307	34.679	7.72		Solyc08g007770.2	8					133.1	70.8	68.2	0.531931	0.512397	0.963277	0.334	84.3167
K4CIZ7	Uncharacterized protein OS=Solanum lycopersicum GN=Solyc08g008630.2 PE=4 SV=1	8.95522	2	3	2	268	30.299	8.48	101266539	LOC101266539; Solyc08g008630.2	8				Pf13225	150.9	45.4	54.9	0.300861	0.363817	1.20925	0.425	41.62
K4CJ19	Uncharacterized protein OS=Solanum lycopersicum GN=Solyc08g013840.2 PE=4 SV=1	9.92908	2	3	2	282	31.475	4.94	101245863	LOC101245863; Solyc08g013840.2	8	metabolic process		catalytic activity	Pf00702, Pf12710, Pf13242, Pf13419	121.9	94.3	90.1	0.773585	0.73913	0.955461	0.54	104.083
K4CKM0	Uncharacterized protein OS=Solanum lycopersicum GN=Solyc08g059760.2 PE=3 SV=1	7.05521	2	2	2	326	35.402	5.85	101257790	LOC101257790; Solyc08g059760.2	8	metabolic process;response to stimulus		antioxidant activity;catalytic activity	Pf00141	112.1	101.9	78.2	0.90901	0.697591	0.767419	0.274	93.3631
K4CNE3	Uncharacterized protein OS=Solanum lycopersicum GN=Solyc08g077840.2 PE=4 SV=1	10.8197	2	2	2	305	34.518	6.1	101248901	LOC101248901; Solyc08g077840.2	8	metabolic process		catalytic activity	Pf07883	89.6	118.6	107.2	1.32366	1.19643	0.903879	0.389	88.62
K4CP37	Uncharacterized protein OS=Solanum lycopersicum GN=Solyc08g080370.2 PE=3 SV=1	4.13043	2	5	2	460	48.969	6.39	101245573	LOC101245573; Solyc08g080370.2	8	defense response;metabolic process;response to stimulus		catalytic activity;metal ion binding	Pf00202	115.2	64.8	86.2	0.5625	0.748264	1.33025	0.318	187.4
K4CP90	Uncharacterized protein OS=Solanum lycopersicum GN=Solyc08g080920.2 PE=4 SV=1	14.3564	2	3	2	202	22.351	6.76		Solyc08g080920.2	8	metabolic process;response to stimulus	cytosol	catalytic activity	Pf02441	82.8	112	112	1.35266	1.35266	1	0.389	73.1667
K4CPX9	Uncharacterized protein OS=Solanum lycopersicum GN=Solyc08g083350.2 PE=3 SV=1	11.0599	2	3	2	217	23.096	9.41	101259181	LOC101259181; Solyc08g083350.2	8	metabolic process	membrane;ribosome	structural molecule activity	Pf00298, Pf03946	129.9	66.5	65.3	0.511932	0.502694	0.981955	0.501	150.81
K4CQ60	Uncharacterized protein OS=Solanum lycopersicum GN=Solyc09g005700.2 PE=3 SV=1	4.6832	2	7	2	363	39.408	6.19	101246955	LOC101246955; Solyc09g005700.2	9	metabolic process	cytoplasm	catalytic activity	Pf01678	121.5	86.6	92.3	0.712757	0.759671	1.06582	0.468	178.034
K4CR71	Uncharacterized protein OS=Solanum lycopersicum GN=Solyc09g010440.2 PE=4 SV=1	25.1799	2	2	2	139	15.998	7.21	101264752	LOC101264752; Solyc09g010440.2	9	cell organization and biogenesis	cytoskeleton	protein binding	Pf00241	142.2	48.5	72	0.341069	0.506329	1.48454	0.931	32.1823
K4CRV1	Uncharacterized protein OS=Solanum lycopersicum GN=Solyc09g014750.1 PE=4 SV=1	24.7525	2	6	2	101	10.868	9.09	101247056	LOC101247056; Solyc09g014750.1	9				Pf00477							0.468	188.817
K4CS37	Uncharacterized protein OS=Solanum lycopersicum GN=Solyc09g015670.2 PE=4 SV=1	8.37359	5	9	2	621	69.033	5.47	101260562	LOC101260562; Solyc09g015670.2	9	transport	endoplasmic reticulum;membrane	metal ion binding	Pf02225	71.3	119.8	81.8	1.68022	1.14727	0.682805	0.546	112.273
K4CTC9	Uncharacterized protein OS=Solanum lycopersicum GN=Solyc09g056340.2 PE=3 SV=1	10.4762	2	2	2	210	23.596	5.07	101260861	LOC101260861; Solyc09g056340.2	9	regulation of biological process;response to stimulus;transport		nucleotide binding	Pf00025, Pf00071, Pf08477	113.8	91.6	83	0.804921	0.72935	0.906114	0.274	55.88
K4CUK9	Uncharacterized protein OS=Solanum lycopersicum GN=Solyc09g065830.2 PE=4 SV=1	6.66667	2	8	2	255	28.264	8.13	101244117	LOC101244117; Solyc09g065830.2	9	metabolic process;response to stimulus		catalytic activity;metal ion binding	Pf01257	107.3	85	90.7	0.792171	0.845294	1.06706	0.585	74.3881
K4CV19	Uncharacterized protein OS=Solanum lycopersicum GN=Solyc09g074420.2 PE=4 SV=1	3.22061	2	3	2	621	67.553	6.06	101261957	LOC101261957; Solyc09g074420.2	9	cell organization and biogenesis;metabolic process		catalytic activity;protein binding	Pf00089, Pf10459, Pf13365	134	85.6	78.8	0.638806	0.58806	0.920561	0.166	49.94
K4CVA6	Uncharacterized protein OS=Solanum lycopersicum GN=Solyc09g075290.2 PE=4 SV=1	21.9251	4	9	2	187	20.829	10.78	101267842	LOC101267842; Solyc09g075290.2	9	metabolic process	membrane;ribosome;vacuole	structural molecule activity	Pf00828	118	83	93.2	0.70339	0.789831	1.12289	2.511	174.698
K4CVP1	Uncharacterized protein OS=Solanum lycopersicum GN=Solyc09g082650.2 PE=3 SV=1	9.91736	2	3	2	242	28.505	5.38		Solyc09g082650.2	9	metabolic process;regulation of biological process	cytoplasm;nucleus	catalytic activity;metal ion binding	Pf03079, Pf07883	116.7	77.3	108.6	0.662382	0.930591	1.40492	0.54	87.1767
K4CW78	Uncharacterized protein OS=Solanum lycopersicum GN=Solyc09g090520.2 PE=4 SV=1	5.47368	2	2	2	475	47.763	6.83	101260765	LOC101260765; Solyc09g090520.2	9			nucleotide binding	Pf00076, Pf13893, Pf14259	87.6	102.7	96	1.17237	1.09589	0.934761	0.311	68.58
K4CWE4	Uncharacterized protein OS=Solanum lycopersicum GN=Solyc09g091180.2 PE=3 SV=1	32.9879	18	136	2	579	61.521	5.63	101250927	LOC101250927; Solyc09g091180.2	9	metabolic process;response to stimulus	cytoplasm;cytosol;membrane;organelle lumen;ribosome	metal ion binding;nucleotide binding	Pf00118	110.8	73.6	77.9	0.66426	0.703069	1.05842	17.632	4427.76
K4CWL0	Uncharacterized protein OS=Solanum lycopersicum GN=Solyc09g091840.2 PE=3 SV=1	9.91189	3	18	2	454	49.35	6.55		Solyc09g091840.2	9	cellular homeostasis;metabolic process;regulation of biological process		antioxidant activity;catalytic activity;nucleotide binding	Pf00070, Pf01266, Pf01593, Pf02852, Pf07992, Pf13434, Pf13454, Pf13738	58	137	113	2.36207	1.94828	0.824818	1.424	547.813
K4CWW3	Uncharacterized protein OS=Solanum lycopersicum GN=Solyc09g097910.2 PE=4 SV=1	6.41026	2	2	2	390	43.265	6.01	101267163	LOC101267163; Solyc09g097910.2	9	response to stimulus	nucleus	RNA binding	Pf00575	135.1	87.1	98.7	0.644708	0.73057	1.13318	0.212	46.02
K4CXF5	Uncharacterized protein OS=Solanum lycopersicum GN=Solyc10g006240.2 PE=3 SV=1	9.0535	2	6	2	243	26.736	7.74	101263166	LOC101263166; Solyc10g006240.2	10				Pf01168	100.1	107	99.9	1.06893	0.998002	0.933645	1.154	267.197
K4CXU6	Uncharacterized protein OS=Solanum lycopersicum GN=Solyc10g007670.2 PE=4 SV=1	13.6646	2	5	2	161	17.933	8.43	101254243	LOC101254243; Solyc10g007670.2	10	cell organization and biogenesis;metabolic process		metal ion binding		98.3	131.3	88.9	1.33571	0.904374	0.677075	0.778	137.52
K4CXV5	Uncharacterized protein OS=Solanum lycopersicum GN=Solyc10g007760.2 PE=4 SV=1	6.52174	2	2	2	322	36.001	7.56	101252123	LOC101252123; Solyc10g007760.2	10	metabolic process		catalytic activity	Pf00156, Pf13793	59.6	164.2	87.7	2.75503	1.47148	0.534105	0.274	47.08
K4CXW3	Uncharacterized protein OS=Solanum lycopersicum GN=Solyc10g007840.2 PE=3 SV=1	4.7259	2	7	2	529	56.376	6.06	101249307	LOC101249307; Solyc10g007840.2	10	cell organization and biogenesis;metabolic process	mitochondrion	catalytic activity;nucleotide binding	Pf01425	126.9	75.6	96.5	0.595745	0.760441	1.27646	0.304	275.086
K4CZD5	Uncharacterized protein OS=Solanum lycopersicum GN=Solyc10g038120.1 PE=4 SV=1	7.41688	3	4	2	391	42.651	6.04		Solyc10g038120.1	10	transport	cytosol		Pf00928	51.4	189.2	87.3	3.68093	1.69844	0.461416	0.274	113.37
K4D181	Uncharacterized protein OS=Solanum lycopersicum GN=Solyc10g054880.1 PE=4 SV=1	8.88031	2	9	2	259	27.981	4.89	101253329	LOC101253329; Solyc10g054880.1	10		endoplasmic reticulum;membrane		Pf03896	80.4	81.7	94.5	1.01617	1.17537	1.15667	3.217	325.301
K4D1Z3	Uncharacterized protein OS=Solanum lycopersicum GN=Solyc10g076510.1 PE=3 SV=1	7.62852	4	10	2	603	65.297	6.21	101247173	LOC101247173; Solyc10g076510.1	10	metabolic process		catalytic activity;metal ion binding	Pf00205, Pf02775, Pf02776	39	143.8	131.9	3.68718	3.38205	0.917246	0.616	211.46
K4D2C4	Uncharacterized protein OS=Solanum lycopersicum GN=Solyc10g078830.1 PE=4 SV=1	11.1554	2	3	2	251	28.38	4.97	101253639	LOC101253639; Solyc10g078830.1	10				Pf00085, Pf02114	88.7	93.8	97	1.0575	1.09357	1.03412	0.585	57.9833
K4D3A4	Uncharacterized protein OS=Solanum lycopersicum GN=Solyc10g083170.1 PE=3 SV=1	8.77193	2	3	2	285	30.232	6.39	101243657	LOC101243657; Solyc10g083170.1	10	metabolic process		catalytic activity	Pf00106, Pf01073, Pf08659, Pf13561	127.4	92.1	92.6	0.72292	0.726845	1.00543	0.292	125.406
K4D3F2	Uncharacterized protein OS=Solanum lycopersicum GN=Solyc10g083650.1 PE=4 SV=1	27.193	4	24	2	228	24.421	8.4	104644379	LOC104644379; Solyc10g083650.1	10	defense response;metabolic process;response to stimulus		catalytic activity	Pf00578, Pf08534	133.5	72.8	84.5	0.545318	0.632959	1.16071	5.105	843.638
K4D443	Uncharacterized protein OS=Solanum lycopersicum GN=Solyc10g086090.1 PE=4 SV=1	13.6842	2	24	2	95	10.676	10.1	101256437	LOC101256437; Solyc10g086090.1	10	regulation of biological process;response to stimulus		enzyme regulator activity	Pf00280	29.5	60.8	47.7	2.06102	1.61695	0.784539	9	502.978
K4D473	Uncharacterized protein OS=Solanum lycopersicum GN=Solyc10g086410.2 PE=3 SV=1	37.7329	26	323	2	644	70.735	5.19	101247772	LOC101247772; Solyc10g086410.2	10	response to stimulus	cytosol;extracellular;Golgi;membrane;ribosome;vacuole	nucleotide binding;protein binding	Pf00012, Pf06723	66.7	120.8	114.6	1.81109	1.71814	0.948675	163.519	7047.05
K4D4X0	Uncharacterized protein OS=Solanum lycopersicum GN=Solyc11g007090.1 PE=3 SV=1	5.37897	2	3	2	409	44.881	6.83		Solyc11g007090.1	11	metabolic process		catalytic activity;metal ion binding	Pf02127, Pf05343	97.8	120	109.1	1.22699	1.11554	0.909167	0.194	75.37
K4D4X3	Uncharacterized protein OS=Solanum lycopersicum GN=Solyc11g007120.1 PE=4 SV=1	6.83453	2	4	2	278	30.448	5.49	101245903	LOC101245903; Solyc11g007120.1	11	cell organization and biogenesis;metabolic process	cytoplasm	metal ion binding;nucleotide binding	Pf01106, Pf08712	90.5	87.8	103.3	0.970166	1.14144	1.17654	0.701	101.34
K4D533	Uncharacterized protein OS=Solanum lycopersicum GN=Solyc11g007720.1 PE=3 SV=1	2.48447	2	4	2	644	68.646	6.27	101257033	LOC101257033; Solyc11g007720.1	11	metabolic process		catalytic activity	Pf00198, Pf00364, Pf02817	109.4	98.3	81.6	0.898537	0.745887	0.830112	0.122	80.5257
K4D5D7	Uncharacterized protein OS=Solanum lycopersicum GN=Solyc11g008770.1 PE=4 SV=1	4.3364	2	5	2	761	86.593	5.77	101252646	LOC101252646; Solyc11g008770.1	11		mitochondrion	metal ion binding	Pf07766	55.1	165	103.3	2.99456	1.87477	0.626061	0.166	123.983
K4D7P8	Uncharacterized protein OS=Solanum lycopersicum GN=Solyc11g032130.1 PE=4 SV=1	6.49718	3	29	2	354	39.638	7.2	101254262	LOC101254262; Solyc11g032130.1	11	metabolic process		catalytic activity;nucleotide binding	Pf00724	53.5	140.1	109.8	2.61869	2.05234	0.783726	1.371	493.746
K4D9H4	Uncharacterized protein OS=Solanum lycopersicum GN=Solyc11g065640.1 PE=4 SV=1	13.8889	2	2	2	216	23.496	6.27	101246790	LOC101246790; Solyc11g065640.1	11			metal ion binding	Pf00111	81.2	120.6	94.2	1.48522	1.1601	0.781095	0.468	72.92
K4D9W3	Uncharacterized protein OS=Solanum lycopersicum GN=Solyc11g067060.1 PE=4 SV=1	10.9244	2	3	2	238	26.423	7.74	101252251	LOC101252251; Solyc11g067060.1	11	metabolic process		catalytic activity	Pf01451	138.3	70.1	74.1	0.506869	0.535792	1.05706	0.638	49.5267
K4D9X3	Uncharacterized protein OS=Solanum lycopersicum GN=Solyc11g067160.1 PE=4 SV=1	5.52764	2	3	2	398	44.409	8.62	101254562	LOC101254562; Solyc11g067160.1	11				Pf00248	127.5	89.3	83.1	0.700392	0.651765	0.930571	0.233	73.1133
K4DA74	Uncharacterized protein OS=Solanum lycopersicum GN=Solyc11g069180.1 PE=3 SV=1	8.25243	2	4	2	412	45.278	7.09	101252846	LOC101252846; Solyc11g069180.1	11	metabolic process	organelle lumen	catalytic activity;nucleotide binding	Pf00441, Pf02770, Pf02771, Pf08028	78.4	116	96.6	1.47959	1.23214	0.832759	0.369	128.076
K4DBW4	Uncharacterized protein OS=Solanum lycopersicum GN=Solyc12g008760.1 PE=4 SV=1	4.79798	2	2	2	396	44.665	5	101266393	LOC101266393; Solyc12g008760.1	12	metabolic process	cytoplasm;cytosol	catalytic activity	Pf02475, Pf05175, Pf05185, Pf06325, Pf08241, Pf08242, Pf12847, Pf13649, Pf13659, Pf13847	100.1	86.5	86.6	0.864136	0.865135	1.00116	0.274	50.1974
K4DCC5	Uncharacterized protein OS=Solanum lycopersicum GN=Solyc12g010380.1 PE=3 SV=1	3.30033	2	2	2	606	67.414	8.13	101248270	LOC101248270; Solyc12g010380.1	12	metabolic process	membrane	catalytic activity;nucleotide binding	Pf00406, Pf01121, Pf05191, Pf09353, Pf13207, Pf13238, Pf13671	104.8	101.1	73.6	0.964695	0.70229	0.727992	0.136	49.83
K4DCK2	Uncharacterized protein OS=Solanum lycopersicum GN=Solyc12g011160.1 PE=4 SV=1	5.20833	2	4	2	384	42.726	5.45	101263879	LOC101263879; Solyc12g011160.1	12	response to stimulus			Pf00378, Pf13766	80.9	118.9	107.7	1.46972	1.33127	0.905803	0.186	62.0361
K4DCP3	Uncharacterized protein OS=Solanum lycopersicum GN=Solyc12g013580.1 PE=4 SV=1	4.43459	2	7	2	451	49.048	6.3	101246897	LOC101246897; Solyc12g013580.1	12	metabolic process	membrane	catalytic activity	Pf00160	120.5	81.1	77.8	0.673029	0.645643	0.959309	0.407	175.919
K4DDL2	Uncharacterized protein OS=Solanum lycopersicum GN=Solyc12g019890.1 PE=3 SV=1	4.42105	2	6	2	475	52.318	5.11	101246798	LOC101246798; Solyc12g019890.1	12	metabolic process	membrane	catalytic activity	Pf00332, Pf00925, Pf07983	84.8	124.6	106	1.46934	1.25	0.850722	0.668	163.24
K4DF79	Uncharacterized protein OS=Solanum lycopersicum GN=Solyc12g042900.1 PE=4 SV=1	9.88372	2	7	2	172	18.834	5.71	101262088	LOC101262088; Solyc12g042900.1	12	transport	membrane	catalytic activity;metal ion binding;transporter activity	Pf01215	67.8	140.5	108.4	2.07227	1.59882	0.77153	0.874	102.737
K4DG11	Uncharacterized protein OS=Solanum lycopersicum GN=Solyc12g056800.1 PE=4 SV=1	5	3	6	2	360	39.628	6.54	101255180	LOC101255180; Solyc12g056800.1	12	metabolic process		catalytic activity	Pf01408	111.1	86.2	108.6	0.775878	0.977498	1.25986	0.492	85.1979
K4DHD8	Uncharacterized protein OS=Solanum lycopersicum GN=Solyc12g096650.1 PE=4 SV=1	7.92952	2	3	2	227	25.337	4.75	101250100	LOC101250100; Solyc12g096650.1	12	transport	membrane		Pf03357	74.5	125.4	87.8	1.68322	1.17852	0.700159	0.334	68.1667
K4DHR2	Uncharacterized protein OS=Solanum lycopersicum GN=Solyc12g098890.1 PE=3 SV=1	10.4938	2	11	2	162	18.184	9.58	101250874	LOC101250874; Solyc12g098890.1	12	metabolic process	ribosome	structural molecule activity	Pf00861	146.1	71.3	99.3	0.488022	0.679671	1.39271	0.874	134.805
K4DHR8	Uncharacterized protein OS=Solanum lycopersicum GN=Solyc12g098950.1 PE=4 SV=1	7.03704	2	3	2	270	30.456	6.93	101248280	LOC101248280; Solyc12g098950.1	12		membrane	protein binding		133.1	69.3	57.1	0.520661	0.429001	0.823954	0.468	74.6033
K4DHU5	Uncharacterized protein OS=Solanum lycopersicum GN=Solyc12g099240.1 PE=4 SV=1	41.8182	5	15	2	110	12.233	5.07	101268083	LOC101268083; Solyc12g099240.1	12		cytosol			84	115.1	117	1.37024	1.39286	1.01651	9	425.091
K4DHX8	Uncharacterized protein OS=Solanum lycopersicum GN=Solyc12g099570.1 PE=4 SV=1	68.8889	2	10	2	45	5.147	5.01		Solyc12g099570.1	12				Pf06825	127.2	61.4	102.9	0.482704	0.808962	1.6759	45.416	283.549
K4DI01	Uncharacterized protein OS=Solanum lycopersicum GN=Solyc12g099800.1 PE=4 SV=1	11.5512	2	2	2	303	33.739	7.27	101255076	LOC101255076; Solyc12g099800.1	12	metabolic process		catalytic activity	Pf00581, Pf00639, Pf13616	121.5	91.4	83.9	0.752263	0.690535	0.917943	0.233	68.09
M0ZGB1	Uncharacterized protein OS=Solanum tuberosum GN=PGSC0003DMG400000067 PE=4 SV=1	14.8571	2	4	2	175	19.269	4.7	102586655	LOC102586655; PGSC0003DMG400000067	1	response to stimulus			Pf03168	70.3	83.6	86.2	1.18919	1.22617	1.0311	0.468	112.34
M0ZHL0	Uncharacterized protein OS=Solanum tuberosum GN=PGSC0003DMG400000347 PE=4 SV=1	8.74439	2	2	2	446	48.998	6.93	102582416	LOC102582416; PGSC0003DMG400000347	12	metabolic process		catalytic activity	Pf01546, Pf07687	93.2	109.4	95.9	1.17382	1.02897	0.8766	0.202	121.812
M0ZKJ3	Uncharacterized protein OS=Solanum tuberosum GN=PGSC0003DMG400001057 PE=4 SV=1	7.55208	2	5	2	384	44.298	9.32	102580389	LOC102580389; PGSC0003DMG400001057	12				Pf04832, Pf10184	147.7	49.2	55.6	0.333108	0.376439	1.13008	0.407	125.2
M0ZLC9	Uncharacterized protein OS=Solanum tuberosum GN=PGSC0003DMG400001299 PE=4 SV=1	4.83871	2	3	2	372	41.751	4.59	102601192	LOC102601192; PGSC0003DMG400001299	2	cell organization and biogenesis;response to stimulus;transport	membrane	protein binding	Pf00023, Pf00385, Pf12796, Pf13606, Pf13637, Pf13857	150.7	86.4	91.8	0.573324	0.609157	1.0625	0.194	41.23
M0ZNS6	Uncharacterized protein OS=Solanum tuberosum GN=PGSC0003DMG400001849 PE=3 SV=1	9.09091	2	2	2	99	11.024	10.08	102588076	LOC102588076; PGSC0003DMG400001849	8	metabolic process	ribosome	structural molecule activity	Pf01780	123.2	75.9	93.7	0.616071	0.760552	1.23452	0.931	50.78
M0ZPB2	Uncharacterized protein OS=Solanum tuberosum GN=PGSC0003DMG400001976 PE=3 SV=1	3.05755	2	5	2	556	63.366	5.58		PGSC0003DMG400001976	11	metabolic process	cytoplasm	catalytic activity;metal ion binding	Pf00293, Pf05153	93.7	123	103.2	1.3127	1.10139	0.839024	0.346	101.93
M0ZQ32	Uncharacterized protein OS=Solanum tuberosum GN=PGSC0003DMG400002174 PE=3 SV=1	9.58904	3	7	2	219	25.045	5.5	102597085	LOC102597085; PGSC0003DMG400002174	9			protein binding	Pf00043, Pf02798, Pf13409, Pf13417	101.1	99.4	82.7	0.983185	0.818002	0.831992	0.931	122.554
M0ZQP4	Uncharacterized protein OS=Solanum tuberosum GN=PGSC0003DMG400002336 PE=4 SV=1	7.24638	2	6	2	345	38.302	5.73	102579606	LOC102579606; PGSC0003DMG400002336	1				Pf00248	111.6	82.9	80.1	0.742832	0.717742	0.966224	0.334	145.47
M0ZQV8	Uncharacterized protein OS=Solanum tuberosum GN=PGSC0003DMG400002387 PE=4 SV=1	8.86525	2	3	2	282	31.938	6.71		PGSC0003DMG400002387	4	metabolic process		catalytic activity	Pf01596, Pf13578	123.1	85.4	102.2	0.693745	0.830219	1.19672	0.389	27.18
M0ZQW3	Uncharacterized protein OS=Solanum tuberosum GN=PGSC0003DMG400002389 PE=3 SV=1	22.1344	4	32	2	253	26.544	7.42	102594350	LOC102594350; PGSC0003DMG400002389	7	metabolic process;regulation of biological process;response to stimulus	cytoplasm;extracellular;membrane;mitochondrion	metal ion binding;nucleotide binding	Pf00166	104.9	107.8	101.9	1.02765	0.971401	0.945269	1.783	1010.68
M0ZRM5	Uncharacterized protein OS=Solanum tuberosum GN=PGSC0003DMG400002559 PE=4 SV=1	4.15755	2	9	2	457	51.278	5.94		PGSC0003DMG400002559	3				Pf00485	149	58.3	69.7	0.391275	0.467785	1.19554	0.28	168.784
M0ZRQ9	Uncharacterized protein OS=Solanum tuberosum GN=PGSC0003DMG400002579 PE=4 SV=1	5.97826	2	2	2	184	20.521	4.73	102583032	LOC102583032; PGSC0003DMG400002579	3	transport	membrane		Pf01217	111.8	84.5	77.4	0.755814	0.692308	0.915976	0.778	54.51
M0ZRX8	Uncharacterized protein OS=Solanum tuberosum GN=PGSC0003DMG400002622 PE=4 SV=1	4.46097	2	3	2	538	60.788	4.87	102588649	LOC102588649; PGSC0003DMG400002622	3	cellular homeostasis;regulation of biological process			Pf00085, Pf13848	133.1	53	67.9	0.398197	0.510143	1.28113	0.233	80.6133
M0ZSL7	Uncharacterized protein OS=Solanum tuberosum GN=PGSC0003DMG400002779 PE=3 SV=1	3.06407	2	5	2	359	39.515	5.83		PGSC0003DMG400002779	1	cellular homeostasis;development;metabolic process;regulation of biological process;response to stimulus	endoplasmic reticulum;membrane	catalytic activity	Pf00085, Pf00578, Pf07749, Pf13098, Pf13899, Pf13905	106.4	49.2	48.7	0.462406	0.457707	0.989837	0.425	82.94
M0ZSU7	Uncharacterized protein OS=Solanum tuberosum GN=PGSC0003DMG400002827 PE=4 SV=1	2.86426	2	2	2	803	88.829	5	102594420	LOC102594420; PGSC0003DMG400002827	4	metabolic process		protein binding;RNA binding	Pf00240, Pf01805, Pf12230	83.1	144.6	77.6	1.74007	0.933815	0.536653	0.145	65.96
M0ZT89	Uncharacterized protein OS=Solanum tuberosum GN=PGSC0003DMG400002929 PE=3 SV=1	11.5079	3	15	2	252	26.668	8.19	102578514	LOC102578514; PGSC0003DMG400002929	12	metabolic process	cytoplasm	nucleotide binding	Pf00166	108	102	103.6	0.944444	0.959259	1.01569	1.239	231.804
M0ZTX3	Uncharacterized protein OS=Solanum tuberosum GN=PGSC0003DMG400003102 PE=4 SV=1	7.16511	2	4	2	321	34.591	5.31	102599558	LOC102599558; PGSC0003DMG400003102	1	metabolic process	cytosol	catalytic activity	Pf00248	138.2	66.1	58.6	0.478292	0.424023	0.886536	0.585	143.223
M0ZUD8	Uncharacterized protein OS=Solanum tuberosum GN=PGSC0003DMG400003198 PE=4 SV=1	13.2701	2	3	2	211	22.737	6.43		PGSC0003DMG400003198	7					88.6	104.3	107.8	1.1772	1.2167	1.03356	0.701	80.75
M0ZWJ1	Uncharacterized protein OS=Solanum tuberosum GN=PGSC0003DMG400003734 PE=4 SV=1	10.3896	2	4	2	231	25.145	4.86	102592745	LOC102592745; PGSC0003DMG400003734	4		cytoplasm		Pf02545	132.5	69.5	82.8	0.524528	0.624906	1.19137	0.425	86.26
M0ZWY9	Uncharacterized protein OS=Solanum tuberosum GN=PGSC0003DMG400003842 PE=4 SV=1	3.33988	2	3	2	509	56.48	4.56	102603989	LOC102603989; PGSC0003DMG400003842	9				Pf03909	81	115.3	91.8	1.42346	1.13333	0.796184	0.241	73.1167
M0ZX98	Uncharacterized protein OS=Solanum tuberosum GN=PGSC0003DMG400003912 PE=4 SV=1	2.54351	2	4	2	747	78.96	6.71	102597175	LOC102597175; PGSC0003DMG400003912	8	metabolic process		catalytic activity	Pf00082, Pf02225, Pf05922	56.2	162.7	105	2.89502	1.86833	0.64536	0.225	166.59
M0ZXL7	Uncharacterized protein OS=Solanum tuberosum GN=PGSC0003DMG400003985 PE=3 SV=1	27.321	11	179	2	377	41.758	5.49	102599168	LOC102599168; PGSC0003DMG400003985	11	cell differentiation;cell division;cell growth;cell organization and biogenesis;response to stimulus	cytoplasm;cytoskeleton;cytosol;membrane;mitochondrion;nucleus;vacuole	metal ion binding;nucleotide binding	Pf00022	72	129	110.5	1.79167	1.53472	0.856589	15.156	3674.22
M0ZZL1	Uncharacterized protein OS=Solanum tuberosum GN=PGSC0003DMG400004498 PE=3 SV=1	3.23054	2	2	2	681	75.601	5.74		PGSC0003DMG400004498	2	metabolic process	cytosol;membrane	catalytic activity;metal ion binding	Pf00557, Pf01321	82.9	102.2	90.7	1.23281	1.09409	0.887476	0.141	54.88
M1A047	Uncharacterized protein OS=Solanum tuberosum GN=PGSC0003DMG400004620 PE=4 SV=1	35.4545	5	8	2	110	12.233	5.07	102585827	LOC102585827; PGSC0003DMG400004620	12		cytosol			73.3	55.1	95.8	0.751705	1.30696	1.73866	3.642	64.6018
M1A0N1	Uncharacterized protein OS=Solanum tuberosum GN=PGSC0003DMG400004734 PE=4 SV=1	15.0407	3	12	2	246	28.2	6.83	102585177	LOC102585177; PGSC0003DMG400004734	8					219.8	25.9	60.5	0.117834	0.27525	2.33591	0.931	204.638
M1A551	Uncharacterized protein OS=Solanum tuberosum GN=PGSC0003DMG400005829 PE=4 SV=1	4.83559	2	2	2	517	57.811	6.19	102590009	LOC102590009; PGSC0003DMG400005829	8	metabolic process;regulation of biological process;response to stimulus	cytosol;membrane;vacuole	catalytic activity;metal ion binding;nucleotide binding	Pf00036, Pf00069, Pf07714, Pf13202, Pf13405, Pf13499, Pf13833	129.2	55	57.7	0.425697	0.446594	1.04909	0.155	67.48
M1A587	Uncharacterized protein OS=Solanum tuberosum GN=PGSC0003DMG400005851 PE=4 SV=1	7.9096	2	6	2	354	38.251	6.87	102578228	LOC102578228; PGSC0003DMG400005851	8	metabolic process	mitochondrion	catalytic activity	Pf03328	159.1	71.6	69.4	0.450031	0.436204	0.969274	0.54	164.673
M1A7S6	Uncharacterized protein OS=Solanum tuberosum GN=PGSC0003DMG400006450 PE=3 SV=1	12.2995	2	2	2	187	22.307	5.17	102599891	LOC102599891; PGSC0003DMG400006450	9	metabolic process	cytoplasm;nucleus	catalytic activity;metal ion binding	Pf00190, Pf02311, Pf03079, Pf07883	92.1	77.1	100.9	0.837134	1.09555	1.30869	0.468	37.16
M1A7X7	Uncharacterized protein OS=Solanum tuberosum GN=PGSC0003DMG400006491 PE=4 SV=1	16.0839	2	3	2	143	15.823	10.65		PGSC0003DMG400006491	12	metabolic process	membrane;ribosome	structural molecule activity	Pf01778	80.5	111.7	125.5	1.38758	1.55901	1.12355	0.995	140.933
M1A9C8	Uncharacterized protein OS=Solanum tuberosum GN=PGSC0003DMG400006877 PE=4 SV=1	3.1694	2	2	2	915	106.658	6.02	102596412	LOC102596412; PGSC0003DMG400006877	1	metabolic process	nucleus	protein binding		77.3	133.9	100.8	1.73221	1.30401	0.752801	0.08	64.06
M1A9K8	Uncharacterized protein OS=Solanum tuberosum GN=PGSC0003DMG400006931 PE=4 SV=1	14.5652	5	14	2	460	49.076	5.94	102604649	LOC102604649; PGSC0003DMG400006931	2	metabolic process		catalytic activity;protein binding	Pf00089, Pf10459, Pf13180, Pf13365	103	126.5	96	1.22816	0.932039	0.758893	1.219	375.81
M1A9W5	Uncharacterized protein OS=Solanum tuberosum GN=PGSC0003DMG400006995 PE=4 SV=1	7.393	2	6	2	257	28.554	5.27	102593878	LOC102593878; PGSC0003DMG400006995	5		cytosol		Pf00300	35.8	161.5	110.5	4.51117	3.08659	0.684211	0.719	126
M1AAL1	Uncharacterized protein OS=Solanum tuberosum GN=PGSC0003DMG400007149 PE=4 SV=1	16.2679	2	4	2	209	22.74	5.22		PGSC0003DMG400007149	6					97.7	109	108.9	1.11566	1.11464	0.999083	0.389	28.6
M1AD62	Uncharacterized protein OS=Solanum tuberosum GN=PGSC0003DMG400007831 PE=3 SV=1	20.8729	14	176	2	527	54.726	6.18		PGSC0003DMG400007831	12	metabolic process	cytoplasm	catalytic activity;metal ion binding	Pf00883, Pf02789	86.4	123.7	104.5	1.43171	1.20949	0.844786	11.328	5149.99
M1AE95	Uncharacterized protein OS=Solanum tuberosum GN=PGSC0003DMG400008088 PE=4 SV=1	9.21053	2	2	2	228	25.06	5.88	102584678	LOC102584678; PGSC0003DMG400008088	11		cytosol		Pf03641	100.1	75.5	83	0.754246	0.829171	1.09934	0.52	43.75
M1AEP7	Uncharacterized protein OS=Solanum tuberosum GN=PGSC0003DMG400008191 PE=4 SV=1	3.31429	2	3	2	875	99.263	5.87	102600594	LOC102600594; PGSC0003DMG400008191	8	metabolic process	cytosol;membrane	catalytic activity;metal ion binding	Pf01433, Pf11838, Pf13485	91	121	86.8	1.32967	0.953846	0.717355	0.083	116.38
M1AEP8	Uncharacterized protein OS=Solanum tuberosum GN=PGSC0003DMG400008193 PE=4 SV=1	5.80357	2	6	2	224	24.898	4.87	102600266	LOC102600266; PGSC0003DMG400008193	8	transport			Pf00638	94.4	98	97.5	1.03814	1.03284	0.994898	1.154	77.43
M1AG04	Uncharacterized protein OS=Solanum tuberosum GN=PGSC0003DMG400008535 PE=4 SV=1	3.56633	2	2	2	701	76.277	5.72	102588435	LOC102588435; PGSC0003DMG400008535	4	transport	membrane			99.8	72.6	87	0.727455	0.871743	1.19835	0.136	34.18
M1AI65	Uncharacterized protein OS=Solanum tuberosum GN=PGSC0003DMG400009042 PE=4 SV=1	34.6774	2	6	2	124	13.324	5.12	102600488	LOC102600488; PGSC0003DMG400009042	1	regulation of biological process;response to stimulus			Pf02672	142.4	81	104.1	0.56882	0.731039	1.28519	1.371	141.427
M1AJ01	Uncharacterized protein OS=Solanum tuberosum GN=PGSC0003DMG400009210 PE=4 SV=1	7.40741	2	3	2	378	41.961	5.01		PGSC0003DMG400009210	11	metabolic process	cytoplasm;nucleus	nucleotide binding;RNA binding	Pf00076, Pf13893, Pf14259	134.2	84.1	91.2	0.626677	0.679583	1.08442	0.468	72.8167
M1AL00	Uncharacterized protein OS=Solanum tuberosum GN=PGSC0003DMG400009698 PE=4 SV=1	26.8353	35	492	2	1621	176.907	6.61	102600112	LOC102600112; PGSC0003DMG400009698	3	metabolic process		catalytic activity	Pf00310, Pf01493, Pf01645, Pf04898	126.1	70.4	92.2	0.558287	0.731166	1.30966	10.565	12805.3
M1ALW9	Uncharacterized protein OS=Solanum tuberosum GN=PGSC0003DMG400009928 PE=4 SV=1	17.2131	2	4	2	122	13.64	6.32	102589731	LOC102589731; PGSC0003DMG400009928	4	regulation of biological process;response to stimulus			Pf02672	99.2	131.8	87.1	1.32863	0.878024	0.66085	2.728	132.361
M1AM96	Uncharacterized protein OS=Solanum tuberosum GN=PGSC0003DMG400009993 PE=4 SV=1	20.5882	2	13	2	170	17.797	8.98	102605586	LOC102605586; PGSC0003DMG400009993	4		membrane;mitochondrion			146.9	57.5	68.3	0.391423	0.464942	1.18783	2.981	563.11
M1ANH9	Uncharacterized protein OS=Solanum tuberosum GN=PGSC0003DMG400010295 PE=4 SV=1	8.09399	2	2	2	383	42.559	4.78	102598068	LOC102598068; PGSC0003DMG400010295	9	transport			Pf00790, Pf03127	90.4	95.3	90.5	1.0542	1.00111	0.949633	0.202	83.94
M1ANN8	Uncharacterized protein OS=Solanum tuberosum GN=PGSC0003DMG400010333 PE=4 SV=1	9.84615	2	3	2	325	37.14	6.02	102599013	LOC102599013; PGSC0003DMG400010333	2	response to stimulus	cytosol	protein binding	Pf00043, Pf13409, Pf13410, Pf14497	109.9	82.4	84.9	0.749773	0.77252	1.03034	0.292	134.753
M1ARF6	Uncharacterized protein OS=Solanum tuberosum GN=PGSC0003DMG400011023 PE=3 SV=1	5.69476	2	2	2	439	48.342	7.87		PGSC0003DMG400011023	10	metabolic process		catalytic activity;nucleotide binding	Pf00441, Pf02770, Pf02771	94.6	116.6	89.6	1.23256	0.947146	0.768439	0.202	37.1
M1ARJ5	Uncharacterized protein OS=Solanum tuberosum GN=PGSC0003DMG400011047 PE=4 SV=1	27.6215	11	86	2	391	43.178	10.45		PGSC0003DMG400011047	10	metabolic process	ribosome	structural molecule activity	Pf00573, Pf14374	98.4	110	106.2	1.11789	1.07927	0.965455	9	1992.43
M1ATA3	Uncharacterized protein OS=Solanum tuberosum GN=PGSC0003DMG400011420 PE=4 SV=1	7.94393	2	5	2	214	25.044	9.63	102599560	LOC102599560; PGSC0003DMG400011420	10	cellular homeostasis;metabolic process;regulation of biological process		catalytic activity	Pf00085, Pf11009, Pf13098	141	83.5	68.2	0.592199	0.483688	0.816766	0.389	119.75
M1AUG5	Uncharacterized protein OS=Solanum tuberosum GN=PGSC0003DMG400011712 PE=4 SV=1	4.0201	2	12	2	398	44.874	8.21		PGSC0003DMG400011712	1	regulation of biological process		DNA binding;RNA binding	Pf00687	91.7	113	117.7	1.23228	1.28353	1.04159	0.492	288.011
M1AUM4	Uncharacterized protein OS=Solanum tuberosum GN=PGSC0003DMG400011753 PE=4 SV=1	13.5407	12	53	2	1093	123.527	4.86		PGSC0003DMG400011753	7				Pf02463, Pf12128	77.5	113.5	110	1.46452	1.41935	0.969163	0.923	861.867
M1AXJ2	Uncharacterized protein OS=Solanum tuberosum GN=PGSC0003DMG400012485 PE=4 SV=1	1.83639	2	2	2	599	68.147	8.73		PGSC0003DMG400012485	8			protein binding	Pf00515, Pf07719, Pf13414, Pf13424, Pf13432, Pf14559	130.7	55.1	62.4	0.421576	0.477429	1.13249	0.119	40.74
M1AY29	Uncharacterized protein OS=Solanum tuberosum GN=PGSC0003DMG400012598 PE=4 SV=1	3.13076	2	3	2	543	59.088	6.49		PGSC0003DMG400012598	2				Pf05266, Pf06148, Pf07223, Pf09770	80	134.6	89.1	1.6825	1.11375	0.661961	0.259	56.6667
M1AZE6	Uncharacterized protein OS=Solanum tuberosum GN=PGSC0003DMG400012912 PE=4 SV=1	10.929	2	14	2	183	20.135	7.99	102587193	LOC102587193; PGSC0003DMG400012912	4	response to stimulus		metal ion binding	Pf03091	69.7	139.2	116.4	1.99713	1.67001	0.836207	2.162	238.52
M1AZL8	Uncharacterized protein OS=Solanum tuberosum GN=PGSC0003DMG400012966 PE=3 SV=1	5	2	4	2	460	48.308	7.46	102592754	LOC102592754; PGSC0003DMG400012966	5	metabolic process	membrane;ribosome	catalytic activity	Pf00198, Pf00364, Pf02817	115.6	113.3	83.7	0.980104	0.724048	0.738747	0.304	128.465
M1B0J3	Uncharacterized protein OS=Solanum tuberosum GN=PGSC0003DMG400013210 PE=4 SV=1	15.3409	3	4	2	176	19.216	7.34		PGSC0003DMG400013210	4	metabolic process		catalytic activity	Pf00227	89.5	75.7	110.7	0.84581	1.23687	1.46235	2.162	52.6464
M1B164	Uncharacterized protein OS=Solanum tuberosum GN=PGSC0003DMG400013339 PE=4 SV=1	14.1732	2	7	2	254	27.86	7.91	102602739	LOC102602739; PGSC0003DMG400013339	11	metabolic process		catalytic activity	Pf00326, Pf01738, Pf02230, Pf12695	88.5	109.4	107.3	1.23616	1.21243	0.980804	0.848	139.011
M1B275	Uncharacterized protein OS=Solanum tuberosum GN=PGSC0003DMG400013598 PE=4 SV=1	7.40741	2	9	2	378	43.156	10.11		PGSC0003DMG400013598	11	metabolic process	ribosome	metal ion binding;structural molecule activity	Pf01655	95.1	104.2	114.9	1.09569	1.2082	1.10269	0.501	224.832
M1B359	Uncharacterized protein OS=Solanum tuberosum GN=PGSC0003DMG400013879 PE=3 SV=1	31.0345	6	61	2	203	21.516	6.7		PGSC0003DMG400013879	2	metabolic process;regulation of biological process		catalytic activity;nucleotide binding	Pf00258, Pf03358	101.1	49.3	100.5	0.487636	0.994065	2.03854	17.738	1221.53
M1B584	Uncharacterized protein OS=Solanum tuberosum GN=PGSC0003DMG400014406 PE=4 SV=1	20.8437	5	10	2	403	44.249	5.12		PGSC0003DMG400014406	10	metabolic process;response to stimulus	cytosol;nucleus	catalytic activity;protein binding	Pf00077, Pf00240, Pf00627, Pf08284, Pf09668, Pf13650, Pf13975	39.3	191.6	97.3	4.87532	2.47583	0.507829	0.688	142.349
M1B588	Uncharacterized protein OS=Solanum tuberosum GN=PGSC0003DMG400014408 PE=4 SV=1	8.91566	2	3	2	415	44.053	6.28	102601845	LOC102601845; PGSC0003DMG400014408	10				Pf02469	158.7	65.2	78	0.410838	0.491493	1.19632	0.334	104.793
M1B923	Uncharacterized protein OS=Solanum tuberosum GN=PGSC0003DMG400015457 PE=4 SV=1	8.50202	2	2	2	247	28.036	5.01	102593749	LOC102593749; PGSC0003DMG400015457	12	transport	membrane	protein binding	Pf05739, Pf09177	85.4	109.5	91.8	1.2822	1.07494	0.838356	0.259	62.4132
M1B9N7	Uncharacterized protein OS=Solanum tuberosum GN=PGSC0003DMG400015599 PE=4 SV=1	14.2045	2	5	2	176	19.246	6.32	102604646	LOC102604646; PGSC0003DMG400015599	5	regulation of biological process;response to stimulus				132.1	79.9	78.2	0.604845	0.591976	0.978723	1.512	165.36
M1BA01	Uncharacterized protein OS=Solanum tuberosum GN=PGSC0003DMG400015677 PE=3 SV=1	9.55056	3	11	2	356	38.928	6.74	102589424	LOC102589424; PGSC0003DMG400015677	11	metabolic process		catalytic activity;metal ion binding	Pf00107, Pf08240	107.1	82.5	107	0.770308	0.999066	1.29697	2.384	307.285
M1BAA1	Uncharacterized protein OS=Solanum tuberosum GN=PGSC0003DMG400015742 PE=4 SV=1	4.95868	2	2	2	484	53.338	8.35		PGSC0003DMG400015742	5	defense response;metabolic process;regulation of biological process;response to stimulus		catalytic activity;metal ion binding;protein binding	Pf07002, Pf10138, Pf13920, Pf13923, Pf14447	57.1	143.6	104.7	2.51489	1.83363	0.729109	0.16	89.6727
M1BB96	Uncharacterized protein OS=Solanum tuberosum GN=PGSC0003DMG400016018 PE=3 SV=1	2.56696	2	4	2	896	101.068	6.79	102581005	LOC102581005; PGSC0003DMG400016018	4	metabolic process	extracellular;vacuole	catalytic activity	Pf01055, Pf13802	102.7	128.1	99.9	1.24732	0.972736	0.779859	0.094	75.03
M1BF20	Uncharacterized protein OS=Solanum tuberosum GN=PGSC0003DMG400016961 PE=4 SV=1	6.66667	3	10	2	360	39.432	6.46	102591504	LOC102591504; PGSC0003DMG400016961	12	metabolic process	cytosol	catalytic activity	Pf01408, Pf02894	92.5	115.5	108.1	1.24865	1.16865	0.935931	0.65	135.46
M1BFR3	Uncharacterized protein OS=Solanum tuberosum GN=PGSC0003DMG400017151 PE=3 SV=1	44.2857	5	11	2	140	15.019	10.48	102601959	LOC102601959; PGSC0003DMG400017151	9	metabolic process	ribosome	structural molecule activity	Pf00238	93.5	66.1	81.9	0.706952	0.875936	1.23903	2.981	368.996
M1BIE3	Uncharacterized protein OS=Solanum tuberosum GN=PGSC0003DMG400017809 PE=4 SV=1	9.78261	2	15	2	276	29.938	6.55	102578855	LOC102578855; PGSC0003DMG400017809	11	metabolic process	membrane	catalytic activity	Pf13806	173.6	43.2	48.4	0.248848	0.278802	1.12037	1.154	577.49
M1BJX6	Uncharacterized protein OS=Solanum tuberosum GN=PGSC0003DMG400018239 PE=4 SV=1	3.07298	2	10	2	781	85.846	4.32	102604558	LOC102604558; PGSC0003DMG400018239	1					112.6	114.5	100.5	1.01687	0.89254	0.877729	0.186	231.14
M1BLY4	Uncharacterized protein OS=Solanum tuberosum GN=PGSC0003DMG400018685 PE=4 SV=1	9.375	2	4	2	160	18.428	10.2		PGSC0003DMG400018685	3	regulation of biological process	nucleus	DNA binding	Pf00505, Pf09011	164.4	58.7	70.8	0.357056	0.430657	1.20613	0.52	53.19
M1BQ10	Uncharacterized protein OS=Solanum tuberosum GN=PGSC0003DMG400019521 PE=4 SV=1	20	3	22	2	280	29.997	7.02		PGSC0003DMG400019521	3	metabolic process		catalytic activity	Pf00834	170.8	52.9	54.8	0.309719	0.320843	1.03592	2.728	626.661
M1BQT9	Uncharacterized protein OS=Solanum tuberosum GN=PGSC0003DMG400019717 PE=4 SV=1	6.95876	2	4	2	388	41.839	5.55	102591897	LOC102591897; PGSC0003DMG400019717	2	metabolic process		catalytic activity	Pf00117, Pf01965, Pf13278	100.8	76.2	112.9	0.755952	1.12004	1.48163	0.438	139.95
M1BRE6	Uncharacterized protein OS=Solanum tuberosum GN=PGSC0003DMG400019883 PE=4 SV=1	7.51566	3	17	2	479	51.072	5.03	102604510	LOC102604510; PGSC0003DMG400019883	10	metabolic process		catalytic activity		193.2	31.9	42.1	0.165114	0.217909	1.31975	0.957	420.35
M1BSG7	Uncharacterized protein OS=Solanum tuberosum GN=PGSC0003DMG400020152 PE=4 SV=1	6.2635	2	3	2	463	51.131	4.64	102580874	LOC102580874; PGSC0003DMG400020152	6	transport		nucleotide binding	Pf00076, Pf02136, Pf13893, Pf14259	80.1	129	97.8	1.61049	1.22097	0.75814	0.292	109.47
M1BT69	Uncharacterized protein OS=Solanum tuberosum GN=PGSC0003DMG400020305 PE=3 SV=1	14.6179	4	17	2	301	34.551	9.47	102594641	LOC102594641; PGSC0003DMG400020305	9	cell proliferation;metabolic process	cytosol;membrane;ribosome;vacuole	RNA binding;structural molecule activity	Pf00861, Pf14204	77.1	140.2	114.3	1.81842	1.48249	0.815264	0.668	258.073
M1BW90	Uncharacterized protein OS=Solanum tuberosum GN=PGSC0003DMG400021112 PE=4 SV=1	5.61798	2	3	2	534	59.84	6.87	102594905	LOC102594905; PGSC0003DMG400021112	2	metabolic process		catalytic activity;nucleotide binding	Pf01565, Pf08031	77.7	136.7	104.3	1.75933	1.34234	0.762985	0.269	59.4333
M1BXK9	Uncharacterized protein OS=Solanum tuberosum GN=PGSC0003DMG400021436 PE=4 SV=1	4.68432	2	4	2	491	54.383	4.44	102587465	LOC102587465; PGSC0003DMG400021436	2				Pf03909	102	75.1	93.7	0.736275	0.918627	1.24767	0.259	137.06
M1C114	Uncharacterized protein OS=Solanum tuberosum GN=PGSC0003DMG400022300 PE=4 SV=1	9.52381	3	10	2	546	61.174	5.19	102600021	LOC102600021; PGSC0003DMG400022300	7	metabolic process;transport			Pf00254, Pf05697, Pf05698	148.8	78.9	63.3	0.530242	0.425403	0.802281	0.259	283.33
M1C2T5	Uncharacterized protein OS=Solanum tuberosum GN=PGSC0003DMG400022735 PE=4 SV=1	2.69122	2	3	2	706	77.513	4.49		PGSC0003DMG400022735	8		cytosol;membrane;nucleus		Pf04424	116.9	81.6	83.9	0.698033	0.717707	1.02819	0.212	54.66
M1C4Z9	Uncharacterized protein OS=Solanum tuberosum GN=PGSC0003DMG400023335 PE=3 SV=1	2.77136	2	4	2	433	50.921	6.34	102581294	LOC102581294; PGSC0003DMG400023335	5	metabolic process	endoplasmic reticulum	metal ion binding;protein binding	Pf00262	71.2	63.1	53.1	0.886236	0.745787	0.841521	0.445	53.2
M1C6M8	Uncharacterized protein OS=Solanum tuberosum GN=PGSC0003DMG400023689 PE=4 SV=1	5.33752	3	10	2	637	69.922	6.18		PGSC0003DMG400023689	10	cell organization and biogenesis		protein binding	Pf00626	110.7	75.8	64.7	0.684734	0.584463	0.853562	0.369	294.54
M1C9T8	Uncharacterized protein OS=Solanum tuberosum GN=PGSC0003DMG400024494 PE=4 SV=1	6.66667	2	3	2	300	33.139	6.68	102593654	LOC102593654; PGSC0003DMG400024494	3				Pf00300	98.6	118.4	91.1	1.20081	0.923935	0.769426	0.311	59.8133
M1C9W6	Uncharacterized protein OS=Solanum tuberosum GN=PGSC0003DMG400024508 PE=4 SV=1	10.2564	4	8	2	390	41.293	9.32	102600011	LOC102600011; PGSC0003DMG400024508	3	regulation of biological process;response to stimulus	mitochondrion		Pf00581	139.9	76.5	76.8	0.546819	0.548964	1.00392	0.668	118.618
M1CA03	Uncharacterized protein OS=Solanum tuberosum GN=PGSC0003DMG400024531 PE=4 SV=1	10.9756	2	10	2	246	27.538	8.13	102585358	LOC102585358; PGSC0003DMG400024531	3	metabolic process		metal ion binding	Pf01789	59.9	192.9	101.2	3.22037	1.68948	0.524624	0.931	192.765
M1CAU6	Uncharacterized protein OS=Solanum tuberosum GN=PGSC0003DMG400024719 PE=4 SV=1	18.4	2	8	2	125	14.013	9.45	102582943	LOC102582943; PGSC0003DMG400024719	1	metabolic process	ribosome	structural molecule activity	Pf01776	92.8	104.6	122.7	1.12716	1.3222	1.17304	1.683	305.81
M1CBS3	Uncharacterized protein OS=Solanum tuberosum GN=PGSC0003DMG400024915 PE=3 SV=1	27.2494	13	57	2	389	44.399	10.08	102590107	LOC102590107; PGSC0003DMG400024915	1	metabolic process	membrane;ribosome	structural molecule activity	Pf00297	85.6	118.8	110.3	1.38785	1.28855	0.928451	5.629	789.921
M1CC30	Uncharacterized protein OS=Solanum tuberosum GN=PGSC0003DMG400024973 PE=4 SV=1	10.6195	2	6	2	113	12.632	7.69		PGSC0003DMG400024973	2	metabolic process		catalytic activity	Pf13085	88.5	101.3	82.3	1.14463	0.929944	0.812438	1.783	56.06
M1CCH8	Uncharacterized protein OS=Solanum tuberosum GN=PGSC0003DMG400025068 PE=4 SV=1	9.52381	2	5	2	168	18.318	9.26	102585320	LOC102585320; PGSC0003DMG400025068	4	response to stimulus	membrane			185	39.1	53	0.211351	0.286486	1.3555	0.778	171.14
M1CDE1	Uncharacterized protein OS=Solanum tuberosum GN=PGSC0003DMG400025300 PE=4 SV=1	16.9697	2	7	2	165	18.566	4.74	102602327	LOC102602327; PGSC0003DMG400025300	4					124.2	70.9	86.5	0.570853	0.696457	1.22003	2.594	58.7243
M1CG26	Uncharacterized protein OS=Solanum tuberosum GN=PGSC0003DMG400025927 PE=4 SV=1	9.40594	2	2	2	202	22.608	6.68		PGSC0003DMG400025927	1	defense response;response to stimulus				124	78.2	74.6	0.630645	0.601613	0.953964	0.425	69.5674
M1CJ70	Uncharacterized protein OS=Solanum tuberosum GN=PGSC0003DMG400026653 PE=4 SV=1	6.75105	2	2	2	237	25.901	9.03		PGSC0003DMG400026653	8				Pf01789	82.2	136.3	100.2	1.65815	1.21898	0.735143	0.359	92.2216
M1CMH0	Uncharacterized protein OS=Solanum tuberosum GN=PGSC0003DMG400027460 PE=4 SV=1	12.2047	2	2	2	254	28.531	6.21		PGSC0003DMG400027460	7	regulation of biological process;response to stimulus	membrane	nucleotide binding	Pf00025, Pf00071, Pf03308, Pf04670	109.3	69.8	79.2	0.638609	0.724611	1.13467	0.334	53.57
M1CN05	Uncharacterized protein OS=Solanum tuberosum GN=PGSC0003DMG400027590 PE=3 SV=1	28.4946	4	32	2	186	19.86	5.82		PGSC0003DMG400027590	6	metabolic process;transport		catalytic activity;transporter activity	Pf02823	60.1	130.6	115.2	2.17304	1.91681	0.882083	4.012	1033.44
M1CNC4	Uncharacterized protein OS=Solanum tuberosum GN=PGSC0003DMG400027686 PE=4 SV=1	16.5605	2	4	2	157	17.344	8.37	102594547	LOC102594547; PGSC0003DMG400027686	6					106.7	77.9	79.2	0.730084	0.742268	1.01669	1.154	105.02
M1CRA9	Uncharacterized protein OS=Solanum tuberosum GN=PGSC0003DMG400028384 PE=4 SV=1	3.81125	2	12	2	551	57.841	6.37		PGSC0003DMG400028384	5					80.1	83.2	117.5	1.0387	1.46692	1.41226	0.334	248.701
M1CSW5	Uncharacterized protein OS=Solanum tuberosum GN=PGSC0003DMG400028737 PE=3 SV=1	2.37812	2	2	2	841	90.132	8		PGSC0003DMG400028737	7	metabolic process	extracellular;membrane	catalytic activity	Pf00082, Pf05922, Pf06280	109.1	116.1	100	1.06416	0.91659	0.861326	0.119	35.36
M1CVC9	Uncharacterized protein OS=Solanum tuberosum GN=PGSC0003DMG400029378 PE=3 SV=1	23.75	8	45	2	240	27.786	9.98	102587452	LOC102587452; PGSC0003DMG400029378	12		ribosome		Pf00327, Pf08079	101.6	101.1	114.6	0.995079	1.12795	1.13353	4.817	734.887
M1CY18	Uncharacterized protein OS=Solanum tuberosum GN=PGSC0003DMG400030029 PE=4 SV=1	1.6835	2	3	2	594	66.832	6.48		PGSC0003DMG400030029	6		vacuole		Pf12222	71.9	134.4	114.1	1.86926	1.58693	0.848958	0.304	41.12
M1CYM7	Uncharacterized protein OS=Solanum tuberosum GN=PGSC0003DMG400030187 PE=4 SV=1	1.7341	2	2	2	1211	134.4	5.43	102606375	LOC102606375; PGSC0003DMG400030187	4	development	nucleus	protein binding	Pf03178, Pf10433	135.2	69.2	67.8	0.511834	0.501479	0.979769	0.08	43.69
M1CZN6	Uncharacterized protein OS=Solanum tuberosum GN=PGSC0003DMG400030439 PE=3 SV=1	6.68896	3	10	2	598	65.463	5.4	102584844	LOC102584844; PGSC0003DMG400030439	6	metabolic process		catalytic activity	Pf00933, Pf01915	108.7	94.3	95.2	0.867525	0.875805	1.00954	0.52	235.26
M1D0F7	Uncharacterized protein OS=Solanum tuberosum GN=PGSC0003DMG400030596 PE=4 SV=1	6.88623	2	2	2	334	36.782	4.72	102602202	LOC102602202; PGSC0003DMG400030596	2	metabolic process	cytosol;nucleus	catalytic activity	Pf05175, Pf06325, Pf08241, Pf08242, Pf12847, Pf13489, Pf13649, Pf13659, Pf13847	101.4	76.6	80.8	0.755424	0.796844	1.05483	0.233	39.12
M1D0I5	Uncharacterized protein OS=Solanum tuberosum GN=PGSC0003DMG400030613 PE=3 SV=1	16.0296	13	38	2	811	91.478	6.81	102591157	LOC102591157; PGSC0003DMG400030613	2	metabolic process;response to stimulus	cytosol;extracellular	catalytic activity;metal ion binding	Pf01432	56.4	115.3	123.1	2.04433	2.18262	1.06765	1.555	903.736
M1D248	Uncharacterized protein OS=Solanum tuberosum GN=PGSC0003DMG400030997 PE=4 SV=1	15.2672	2	7	2	131	14.706	8.13	102603706	LOC102603706; PGSC0003DMG400030997	5					65.4	137.1	99.1	2.09633	1.51529	0.72283	1.683	126.897
M1D357	Uncharacterized protein OS=Solanum tuberosum GN=PGSC0003DMG400031224 PE=4 SV=1	8.17308	5	10	2	624	69.143	5.76	102594404	LOC102594404; PGSC0003DMG400031224	10	transport	endoplasmic reticulum;membrane	metal ion binding	Pf02225	89.6	100.9	78.1	1.12612	0.871652	0.774034	0.624	216.68
M1D3N5	Uncharacterized protein OS=Solanum tuberosum GN=PGSC0003DMG400031370 PE=4 SV=1	5.50459	2	6	2	436	47.987	8.21		PGSC0003DMG400031370	4	metabolic process		catalytic activity	Pf02779, Pf02780	131.6	86.6	85	0.658055	0.645897	0.981524	0.551	103.563
M1D6E8	Uncharacterized protein OS=Solanum tuberosum GN=PGSC0003DMG400033037 PE=3 SV=1	47.5138	26	1713	2	362	40.242	7.55		PGSC0003DMG400033037	6	metabolic process		catalytic activity;metal ion binding	Pf00016, Pf02788	96.5	56	104.4	0.580311	1.08187	1.86429	5924.53	29064.1
M1DF23	Uncharacterized protein OS=Solanum tuberosum GN=PGSC0003DMG400037583 PE=4 SV=1	4.04172	2	2	2	767	80.991	8.09	102598020	LOC102598020; PGSC0003DMG400037583	3	metabolic process	extracellular;membrane;vacuole	catalytic activity	Pf00082, Pf02225, Pf05922	87.1	135.5	95.7	1.55568	1.09874	0.706273	0.068	62.93
M0ZU37	Uncharacterized protein OS=Solanum tuberosum GN=PGSC0003DMG401003132 PE=4 SV=1	13.9344	2	30	2	122	13.444	6.52		PGSC0003DMG401003132	8					105.9	110.1	109.5	1.03966	1.03399	0.99455	4.623	636.711
M1A5H7	Uncharacterized protein OS=Solanum tuberosum GN=PGSC0003DMG401005911 PE=3 SV=1	8.93855	2	9	2	179	19.51	10.58		PGSC0003DMG401005911	6	metabolic process	ribosome	structural molecule activity	Pf00366	103.6	89.4	105	0.862934	1.01351	1.1745	0.874	214.652
M1AKA8	Uncharacterized protein OS=Solanum tuberosum GN=PGSC0003DMG401009485 PE=4 SV=1	2.45161	2	3	2	775	85.433	7.23	102598405	LOC102598405; PGSC0003DMG401009485	4	metabolic process		catalytic activity	Pf00933, Pf01915, Pf14310	84.7	136.3	113.3	1.60921	1.33766	0.831255	0.091	118.553
M1B4E3	Uncharacterized protein OS=Solanum tuberosum GN=PGSC0003DMG401014218 PE=4 SV=1	7.62943	3	11	2	367	39.245	4.54	102593740	LOC102593740; PGSC0003DMG401014218	3	metabolic process;response to stimulus	nucleus	DNA binding;protein binding	Pf00240, Pf00627, Pf09280, Pf11976	86.7	111.6	105.6	1.2872	1.21799	0.946237	1.371	183.27
M1BAI7	Uncharacterized protein OS=Solanum tuberosum GN=PGSC0003DMG401015792 PE=3 SV=1	7.98722	2	4	2	313	34.155	9.35		PGSC0003DMG401015792	3	metabolic process		catalytic activity	Pf00106, Pf08659, Pf13460	173.7	29.3	35.6	0.168682	0.204951	1.21502	0.668	134.82
M1BZ89	Uncharacterized protein OS=Solanum tuberosum GN=PGSC0003DMG401021870 PE=4 SV=1	2.88557	2	2	2	1005	107.894	4.68		PGSC0003DMG401021870	9			metal ion binding		79.1	149.4	79.5	1.88875	1.00506	0.532129	0.077	88.56
M1CGY4	Uncharacterized protein OS=Solanum tuberosum GN=PGSC0003DMG401026150 PE=4 SV=1	10.9756	2	7	2	328	36.103	7.56	102599432	LOC102599432; PGSC0003DMG401026150	7	metabolic process		catalytic activity	Pf01182	78.4	118.1	113.7	1.50638	1.45026	0.962743	0.624	112.189
M1CL95	Uncharacterized protein OS=Solanum tuberosum GN=PGSC0003DMG401027165 PE=3 SV=1	28.6213	17	139	2	573	61.173	6.15	102582102	LOC102582102; PGSC0003DMG401027165	5	metabolic process;response to stimulus	cytoplasm;cytosol;membrane;organelle lumen;ribosome	metal ion binding;nucleotide binding	Pf00118	111	64.6	86.1	0.581982	0.775676	1.33282	20.102	4241.4
M0ZQU1	Uncharacterized protein OS=Solanum tuberosum GN=PGSC0003DMG402002368 PE=4 SV=1	5.01567	2	2	2	319	35.461	5.15	102580549	LOC102580549; PGSC0003DMG402002368	12				Pf03909	128.4	65.5	60.7	0.510125	0.472741	0.926718	0.259	45.45
M1AHS7	Uncharacterized protein OS=Solanum tuberosum GN=PGSC0003DMG402008946 PE=3 SV=1	5.49451	2	2	2	364	41.129	6.06	102597152	LOC102597152; PGSC0003DMG402008946	9	metabolic process;regulation of biological process		catalytic activity;metal ion binding	Pf03171, Pf14226	88.7	92.3	94.7	1.04059	1.06764	1.026	0.311	59.7421
M1BB01	Uncharacterized protein OS=Solanum tuberosum GN=PGSC0003DMG402015926 PE=4 SV=1	5.72207	2	5	2	367	40.418	7.21	102604552	LOC102604552; PGSC0003DMG402015926	7	metabolic process	membrane	catalytic activity	Pf00248	160.5	66.3	79.1	0.413084	0.492835	1.19306	0.468	159.85
M1D3D7	Uncharacterized protein OS=Solanum tuberosum GN=PGSC0003DMG402031287 PE=4 SV=1	7.60563	2	2	2	355	38.613	9.13		PGSC0003DMG402031287	9	cell organization and biogenesis;metabolic process		catalytic activity	Pf01073, Pf01370, Pf05368, Pf07993, Pf08338, Pf13460	134.9	62.2	66.5	0.461082	0.492958	1.06913	0.245	72.02
M1C4C1	Uncharacterized protein OS=Solanum tuberosum GN=PGSC0003DMG403023117 PE=4 SV=1	6.03448	2	2	2	348	38.976	5.85	102591845	LOC102591845; PGSC0003DMG403023117	4	metabolic process;response to stimulus		catalytic activity	Pf03214	68.5	101.4	113.2	1.48029	1.65255	1.11637	0.212	44.77
Q42967	Uroporphyrinogen decarboxylase, chloroplastic OS=Nicotiana tabacum GN=DCUP PE=1 SV=1	20.4604	7	36	2	391	43.089	8.84				metabolic process		catalytic activity	Pf01208	164.2	64.8	83.1	0.394641	0.50609	1.28241	2.981	1181.41
W8TFM0	Uroporphyrinogen-III synthase OS=Nicotiana tabacum PE=2 SV=1	6.27063	2	2	2	303	32.317	8.62				metabolic process		catalytic activity	Pf02602	117.8	112.5	94.2	0.955008	0.79966	0.837333	0.334	42.18
M1AJZ7	V-type proton ATPase subunit F OS=Solanum tuberosum GN=PGSC0003DMG400009421 PE=3 SV=1	20	2	2	2	130	14.535	6.57	102603935	LOC102603935; PGSC0003DMG400009421	2	transport	Golgi;membrane	catalytic activity;transporter activity	Pf01990	85.8	112.8	105	1.31469	1.22378	0.930851	0.931	29.38
Q5K4L4	Villin 2 (Fragment) OS=Nicotiana tabacum GN=vln2 PE=2 SV=1	13.0769	5	10	2	520	56.686	5.96				cell organization and biogenesis		protein binding	Pf00626, Pf02209	103.4	65.2	75	0.630561	0.725338	1.15031	0.585	249.84

## Sheet: Table S2
Supplemental Table S2. The 100 most abundant proteins in non-infiltrated (n.i.) leaves
#	Accession	Description	Abundance n.i.	Abundance EV	Abundance M2
1	Q9XEX8	Remorin	226.1	40.5	54
2	P29302	Photosystem I reaction center subunit II, chloroplastic	224.8	32.2	35.6
3	A0A076L2F1	Remorin 1	223.1	37	48.4
4	M1A0N1	Uncharacterized protein	219.8	25.9	60.5
5	P59702	Cytochrome b559 subunit alpha	214.1	20.9	27.9
6	Q84QE4	Putative chloroplast thiazole biosynthetic protein	213.3	43.2	81.7
7	K4C841	Uncharacterized protein	211.8	26	45.2
8	Q84UU0	Photosystem I subunit XI	211.5	32.2	41.4
9	I6N953	Photosystem II CP43 reaction center protein	211.4	28.5	34.9
10	A8Y6H4	ATP synthase subunit beta (Fragment)	210.4	36.2	58.2
11	A0A075VUZ8	Photosystem II D2 protein	209	31.5	35.3
12	M1DBW2	Uncharacterized protein	205.9	29.7	76.6
13	Q43797	Inorganic pyrophosphatase	205.5	20.2	26.2
14	K4CCP7	Elongation factor Ts	205.3	16.9	38.2
15	P06290	ATP synthase subunit b, chloroplastic	204.9	26.1	34.4
16	Q0PWS5	Chloroplast pigment-binding protein CP26	201.6	19.1	22.8
17	A0A0A8WK76	Aquaporin PIP2 9b	200.2	21.3	27.4
18	K4C7M7	ATP synthase subunit b', chloroplastic-like	199.4	28.2	45
19	M1CRT2	Uncharacterized protein	197.2	40.4	49.9
20	A0A0C5AT01	Photosystem II protein D1	196.8	43.1	46.4
21	Q0PWS6	Chloroplast pigment-binding protein CP24	196.1	18.2	28.7
22	K4C390	Thiamine biosynthesis protein ThiC-like	195.1	47	85.5
23	M1DZ44	Photosystem II CP47 reaction center protein	194.9	46.9	45.6
24	M0ZU44	Elongation factor Ts	194	50.3	61.2
25	A0A059Q6D7	Photosystem I P700 chlorophyll a apoprotein A2	193.7	44.9	54.8
26	A0A060BCE9	Photosystem I P700 chlorophyll a apoprotein A1	193.6	46.3	51.4
27	K4C4W2	remorin-like	193.2	24.6	48.9
28	M1BRE6	Chitinase-like	193.2	31.9	42.1
29	K4CIH7	tubulin alpha chain-like	193	56.7	59.7
30	K4CHX2	delta-aminolevulinic acid dehydratase, chloroplastic-like	191.8	42.2	78.1
31	K4CRS9	chlorophyll a-b binding protein CP29.2, chloroplastic-like	191	35.2	35.2
32	A7XZB8	Chloroplast-localized protein	190.7	34.3	45.9
33	K7WJR7	Chlorophyll a/b-binding protein	190.3	23.9	27.9
34	A0A0C5B729	30S ribosomal protein S4, chloroplastic	189.5	39.4	81.8
35	B3F8G9	1-hydroxy-2-methyl-2-(E)-butenyl 4-diphosphate reductase	188.9	50.9	57.8
36	K4CNS6	elongation factor G, chloroplastic-like	187.9	59.7	59.2
37	Q08935	29 kDa ribonucleoprotein A, chloroplastic	186.6	47.1	62.7
38	K4C994	lysosomal beta glucosidase-like	186.6	46.9	42.2
39	K4AZT2	Uncharacterized protein	186.4	32.7	42
40	M1A511	Photosystem I reaction center subunit-like	185.9	27.5	37.2
41	A0A067YEL0	Zeta-carotene desaturase	185.7	57.8	56.5
42	M1CCH8	Chloroplast one-helix protein 2-like	185	39.1	53
43	O22436	Magnesium-chelatase subunit ChlI, chloroplastic	183.5	66.1	66.4
44	E5L8B6	Plastid thioredoxin F	183.5	62.4	71.3
45	K4BML2	30S ribosomal protein S17, chloroplastic-like	182.5	47.9	82.7
46	Q08937	29 kDa ribonucleoprotein B, chloroplastic	181.4	55	61.7
47	G9BRR3	Heme oxygenase 1	179.9	35.2	46.1
48	K4BKH7	Uncharacterized protein	179.5	18.9	29.2
49	P32980	ATP synthase delta chain, chloroplastic	179.2	37.5	44.5
50	K4B0Q1	UPF0603 protein At1g54780, chloroplastic-like	179.1	31.3	41.8
51	K4B7F9	Uncharacterized protein	179	37.3	47.9
52	K4ASB8	Uncharacterized protein	177.9	43.4	52.3
53	K4C5D0	em protein H5-like	176.4	88	62.9
54	A0A076L1Z5	Remorin 2	175.1	49.9	53.4
55	M1BAI7	Short-chain dehydrogenase TIC 32, chloroplastic-like	173.7	29.3	35.6
56	M1BIE3	Oxidoreductase-like	173.6	43.2	48.4
57	I0B7J8	Chloroplast PsbP4	172.9	63.5	63.9
58	A0A075F1U5	Protein tyrosine phosphatase	171.2	71.4	63.7
59	K4D2P9	Thioredoxin reductase	171	68.3	66.8
60	M1BQ10	Ribulose-phosphate 3-epimerase, chloroplastic-like	170.8	52.9	54.8
61	K4B5N7	aspartic proteinase A1-like	170.6	95.9	73.5
62	Q40425	RNA-binding gricine-rich protein-1c	169.8	19.5	44.5
63	A7U629	Chloroplast methionine sulfoxide reductase B2	169.5	53	76.7
64	A0A076KWG9	Chloroplast sedoheptulose-1,7-bisphosphatase	168.1	63.3	97.7
65	M0ZH09	Chitinase-like	168	39.5	59.6
66	P30155	50S ribosomal protein L27, chloroplastic	167.9	50.8	92.5
67	K4AVZ4	30S ribosomal protein S1, chloroplastic-like	167.7	47.2	60.3
68	A0A0A1E5J9	CBL3 protein	167.7	36.5	49.4
69	K4BM77	histidine--tRNA ligase-like	167.7	59.3	68.3
70	Q93YF8	Hydroperoxide lyase	167.4	55.9	63.1
71	H9CCH7	Beta-keto-ACP reductase	166.1	45.7	46.3
72	Q9M7J4	MAR-binding filament-like protein 1-1	165.8	63.9	58.8
73	K4BXD1	30S ribosomal protein 3-1, chloroplastic-like	165.8	46	68.9
74	A4D0J8	Carbonic anhydrase (Fragment)	165.6	93.3	84.8
75	K4B6T0	CBS domain-containing protein CBSX1, chloroplastic-like	164.6	47.6	58.1
76	M1BLY4	High mobility group protein 2 HMG2-like	164.4	58.7	70.8
77	Q42967	Uroporphyrinogen decarboxylase, chloroplastic	164.2	64.8	83.1
78	K4CXU8	Chlorophyll a-b binding protein 8, chloroplastic-like	164	44.8	51.1
79	O80362	50S ribosomal protein L10, chloroplastic	163.6	58.3	59.2
80	M0ZND0	50S ribosomal protein L5-like	163.5	61.2	89
81	J7HAR8	ATP synthase epsilon chain, chloroplastic	163.1	52.9	70.9
82	K4CYL4	Cysteine synthase	162.5	26.2	55.4
83	A0A059Q659	Ribosomal protein S8	161.8	58.9	87.2
84	K4CBJ8	Uncharacterized protein	161.2	69.3	91
85	M1BB01	Aldo/keto reductase-like	160.5	66.3	79.1
86	K4BPJ2	actin-depolymerizing factor 2-like	160.3	43.3	62.4
87	H1AD87	ADP-ribosylation factor-like 8a	159.7	42.8	52.7
88	M1A587	2,4-dihydroxyhept-2-ene-1,7-dioic acid aldolase-like	159.1	71.6	69.4
89	M1B588	Fasciclin-like arabinogalactan protein 10-like	158.7	65.2	78
90	S6A7M4	Cysteine synthase	158.1	61.7	83.2
91	I0B7J9	Chloroplast PsbQ1	157.2	61.1	56
92	K4BK33	Uncharacterized protein	157.2	52.2	72.3
93	Q08948	33 kd chloroplast ribonucleoprotein	157.1	69.6	86.2
94	Q7XZV3	24K germin like protein	157	77.5	89
95	K4BM64	Peptidyl-prolyl cis-trans isomerase	156.8	51.4	58.8
96	J7EYL4	GRX1	155.2	55.8	59.2
97	K4DI37	50S ribosomal protein L6, chloroplastic-like	155.1	48.1	82.3
98	A5A5A1	Ribosomal protein L25	154.9	54.8	87
99	Q94IK1	Subunit A of ferredoxin-thioredoxin-reductase	154.8	70.9	71
100	B2LT58	Elongation factor 1 gamma-like protein	154.7	55.3	51.7

## Sheet: Table S3
Supplemental Table S3. The 100 most abundant proteins in EV-infiltrated leaves
#	Accession	Description	Abundance n.i.	Abundance EV	Abundance M2
1	J9XUY3	Kunitz-type protease inhibitor (Fragment)	18.8	286.2	25.1
2	K4B8W8	phospholipase A1-II 1-like	28	267.9	61.3
3	P23432	Glucan endo-1,3-beta-glucosidase	12.3	263.6	85.3
4	P07052	Pathogenesis-related protein R minor form	41.3	245.9	67.8
5	Q50LG4	Peroxidase	25	222.2	49.8
6	K4B7Q7	probable cinnamyl alcohol dehydrogenase 6-like	46.1	210.9	74.9
7	Q9LW96	Inositol-3-phosphate synthase	39.7	200.9	122.7
8	Q70G33	Hydroxycinnamoyl CoA quinate transferase	40.5	200.1	95.2
9	M1CA03	Thylakoid lumenal 25.6 kDa protein, chloroplast-like	59.9	192.9	101.2
10	Q84LQ7	29 kDa chitinase-like thermal hysteresis protein (Fragment)	26.2	192.7	72.2
11	M1B584	DNA damage-inducible protein 1-like	39.3	191.6	97.3
12	Q43584	HSR203J	31.1	191	88.7
13	D4IHB9	Nb cell deth marker	23.3	190.3	44.8
14	K4CZD5	coatomer subunit delta-2-like	51.4	189.2	87.3
15	P08252	Endochitinase A	31.4	189.1	77
16	A0A0B5GNH2	Endoplasmic reticulum chaperone binding protein	28.3	188.3	112.6
17	J9Y6P6	Salicylic acid-binding protein 2	65.9	179.2	84.3
18	O23792	CND41, chloroplast nucleoid DNA binding protein	75.6	179.1	92
19	D3TI69	Beta-hexosaminidase	74.5	173	95.5
20	A0A075EYT4	Acyl-coenzyme A oxidase	40.1	172	106.4
21	K4C2W4	Protein disulfide-isomerase	28.2	171.5	121.2
22	Q2QFR3	Cysteine proteinase aleuran type	34.3	169.8	122.3
23	U3RJ91	Mitochondrial gamma aminobutyrate transaminase 1	52.3	167.3	96.3
24	K4B139	topless-related protein 3-like	59.9	165.6	85.9
25	Q02200	Lignin-forming anionic peroxidase	42	165.3	54
26	Q5UNS2	Arginase 1	65.7	165.2	102.2
27	K4D5D7	LETM1 and EF-hand domain-containing protein 1, mitochondrial-like	55.1	165	103.3
28	K4CXV5	ribose-phosphate pyrophosphokinase 4-like	59.6	164.2	87.7
29	K4BA67	vacuolar-sorting receptor 6-like	48.9	163.1	92.7
30	M0ZX98	P69F protein-like	56.2	162.7	105
31	Q03685	Luminal-binding protein 5	40.9	162.2	116.3
32	M1A9W5	PRIB5 protein-like	35.8	161.5	110.5
33	M1CBR7	Coatomer delta subunit-like	55.5	161.2	102.7
34	D2CFQ1	Phenylalanine ammonia-lyase	68.7	160.9	94.3
35	Q9FR00	Avr9/Cf-9 rapidly elicited protein 31	29.4	160.8	121.2
36	A0A059XN47	Polygalacturonase inhibitor protein	32.7	159.7	107
37	B7U9Z3	ER luminal-binding protein	58.6	159.5	101
38	W6JLY5	Nuclear pore complex protein TPRa	73	157.5	91.5
39	M1AWJ2	Heat shock protein 70-like	38.2	156.6	123
40	K4C735	NADP-dependent alkenal double bond reductase P1-like	50.2	156.3	103.7
41	C9DFB7	Protein disulfide isomerase (Fragment)	40.1	156	117.4
42	K4B2H7	psbP domain-containing protein 1, chloroplastic-like	79.1	155.5	99.9
43	M1AP43	Pyrroline-5-carboxylate reductase	64.3	154.4	129.3
44	Q6L5N5	Heat shock protein 70 (Fragment)	37.2	154.3	122.4
45	A0A077DCL8	Phosphoenolpyruvate carboxykinase	76.1	153	52.5
46	K4CGM9	hydroxyacylglutathione hydrolase 3, mitochondrial-like	43.5	151.8	114.8
47	Q8GUA3	Vacuolar invertase	77.7	151.6	92.8
48	V9TLJ9	12-oxophytodienoate reductase 1	39.9	151.5	114.2
49	C9DFB6	Uncharacterized protein	67.9	150.6	123.1
50	A9YTW5	Putative red chlorophyll catabolite reductase	60.6	150.5	118.6
51	C5IJ81	Calmodulin isoform 1	66.3	150.2	100
52	K4BUA0	E3 ubiquitin-protein ligase UPL2-like	72	150	105.2
53	A0A075F2G1	Gamma-glutamylhydrolase 2	69.3	149.8	115.1
54	K4AR66	Peroxidase	38.7	149.4	106.8
55	M1BZ89	Hypothetical salt-inducible protein	79.1	149.4	79.5
56	K4CDS7	Uncharacterized protein	70.3	149.1	115.8
57	K4B985	splicing factor 3B subunit 2-like	76	148.8	96.7
58	Q9SQI4	Centrin	63.8	148.7	101.6
59	K4BIU3	Superoxide dismutase	89.8	148.4	99.1
60	Q67C43	Glutamate dehydrogenase alpha subunit (Fragment)	58.8	148.3	111.6
61	M1BBJ6	10-hydroxygeraniol oxidoreductase-like	26.4	148	104.5
62	M1A0K5	Signal recognition particle 9 kDa protein	60.7	147.9	115.3
63	E0X585	Mitochondrial glycine decarboxylase complex P-protein-like protein	75.3	147.7	109.3
64	K4BNN0	IST1 homolog-like	60.1	147.6	116
65	Q42964	Peroxidase	52.1	146.6	130.6
66	Q43799	Beta-fructosidase (Beta-fructofuranosidase)	44.3	146.5	70.6
67	B6EWX2	Glycosyltransferase	68	146.5	80.9
68	M0ZHY6	Serine carboxypeptidase-like 51-like	82.9	146.4	108.7
69	U3PWQ0	EF2 protein	33.6	146.3	116.6
70	M0ZKF0	H+-transporting two-sector ATPase-like	85.6	145.6	101.1
71	Q94KK8	Glutamate decarboxylase	39.7	145.5	135.5
72	Q42896	Fructokinase-2	63.3	145.5	109.6
73	K4BT18	TOM1-like protein 2-like	48	144.8	100.5
74	M0ZSU7	Spliceosome associated protein	83.1	144.6	77.6
75	W6JPQ8	Nuclear pore complex protein Nup50d	73.5	144	103.2
76	K4BLV4	glutamyl-tRNA(Gln) amidotransferase subunit A-like	71.5	143.8	104.2
77	K4D1Z3	pyruvate decarboxylase isozyme 2-like	39	143.8	131.9
78	K4C2H1	nitrilase homolog 1-like	69.8	143.7	105.4
79	M1BAA1	Copine I-like	57.1	143.6	104.7
80	K4C247	60S ribosomal protein L13a-4-like	73.6	143.3	113.5
81	Q6XP48	UDP-Glc-4-epimerase	69.6	143.2	75.4
82	M0ZSX2	Purple acid phosphatase	58.9	143.1	119.2
83	K4CLG9	vacuolar protein sorting-associated protein 32 homolog 1-like	62.7	142.7	91.3
84	W6JJ80	Nuclear pore complex protein Nup50c	81.3	142.7	94.1
85	H1ZXA9	Heat shock protein 70 isoform 3	70.2	142.7	91.6
86	Q41229	Photosystem I reaction center subunit IV B, chloroplastic	94.2	142.1	93.4
87	Q40473	PS60 protein	94.7	141.9	95.5
88	K4BZ96	3-hydroxyisobutyryl-CoA hydrolase-like protein 3, mitochondrial-like	70.8	141.8	107.1
89	M1BAU4	Alpha-glucosidase	110.6	141.7	89.1
90	Q6QD77	Glutathione reductase (Fragment)	65.4	141.4	112.4
91	K4CEA5	peroxiredoxin Q, chloroplastic-like	72.5	141.1	110.7
92	K4BAN9	26S proteasome non-ATPase regulatory subunit 4-like	70.6	141	101.3
93	K4DBX2	Beta-galactosidase	61.1	140.6	71.9
94	P25872	Phenylalanine ammonia-lyase	66.9	140.6	107.2
95	C3VP56	SnRK2 calcium sensor	87.2	140.5	101.4
96	Q42961	Phosphoglycerate kinase, chloroplastic	84.2	140.5	85.6
97	K4CLR1	Lactoylglutathione lyase	92.6	140.5	98
98	B5LAW1	Putative aminotransferase	61.4	140.5	116.3
99	K4C284	Glutamate decarboxylase	49.3	140.5	133.9
100	K4DF79	Cytochrome c oxidase subunit 5b-2, mitochondrial-like	67.8	140.5	108.4

## Sheet: Table S4
Supplemental Table S4. The 100 most abundant proteins in M2-expressing leaves
#	Accession	Description	Abundance n.i.	Abundance EV	Abundance M2
1	K4BF11	Peroxidase	24.6	96.2	185.6
2	H2ESL0	Pathogenesis-related protein PR10	29.3	79.3	176.6
3	A0A068JKR2	Pathogenesis-related protein PR-10	31.4	91.1	173.9
4	K4C261	Serine hydroxymethyltransferase	44.7	107.1	170.9
5	Q5NTA8	Putative 5-epi-aristolochene synthase (Fragment)	33.6	117.2	156.7
6	A1BQW9	Transketolase (Fragment)	66.9	111.5	156.5
7	C3RXI5	Plastid transketolase	78.2	100.2	151.6
8	Q42962	Phosphoglycerate kinase, cytosolic	64.9	99	144.8
9	Q68HC9	Glucose-6-phosphate isomerase	53.8	117.9	144.3
10	A0A0F6P9E3	Aldehyde dehydrogenase 1	37.5	115.5	143.4
11	A0A076FN11	Glucose-6-phosphate isomerase	52	123.8	143.1
12	M1CRA7	Alpha-1,4 glucan phosphorylase	64	113.3	140.7
13	P80969	Tyramine N-feruloyltransferase 10/30	25.6	96.3	139.9
14	Q2V9C6	Phosphoglycerate kinase	69.5	104.7	137.4
15	J7ERA8	Hydroxycinnamoyl transferase (Fragment)	42.4	105.7	136.3
16	Q94KK8	Glutamate decarboxylase	39.7	145.5	135.5
17	Q5M9V4	ATP synthase subunit alpha	51	110.7	135
18	K4C0M5	protein usf-like	45	139.6	134.6
19	K4BHG4	Alpha-1,4 glucan phosphorylase	64.9	122.2	134.3
20	K4C284	Glutamate decarboxylase	49.3	140.5	133.9
21	Q84KK7	Respiratory burst oxidase homolog	45.3	103.2	133.6
22	O81101	Glutamate decarboxylase	60.5	136.7	132.8
23	K4BCV4	Serine hydroxymethyltransferase	79.1	105.1	132.8
24	K4D1Z3	pyruvate decarboxylase isozyme 2-like	39	143.8	131.9
25	K4BRF6	putative methyltransferase DDB_G0268948-like	31.3	131	130.8
26	Q42964	Peroxidase	52.1	146.6	130.6
27	A0A077D830	Superoxide dismutase copper chaperone isoform 1	57.3	98.1	129.4
28	M1AP43	Pyrroline-5-carboxylate reductase	64.3	154.4	129.3
29	K4BMT2	60S ribosomal protein L28-1-like	89.6	107.4	129.2
30	K4CPW9	probable inactive purple acid phosphatase 27-like	40.1	105.4	129.1
31	K4DHU7	ATP-citrate synthase beta chain protein 1-like	47.9	125.7	128.8
32	M0ZKA6	Aspartate carbamoyltransferase-like	91.3	96	128.6
33	M1B9T8	Aspartate aminotransferase	88.6	85.2	128.5
34	K4BKV2	enolase 1, chloroplastic-like	64.7	114.7	126.1
35	A0A076KWG3	Transaldolase	52.7	125	126.1
36	Q9SYX6	Beta-1,3-glucanase	45.2	135.6	126
37	A0A088DBC4	Copper chaperone	93.8	58.2	125.6
38	M1A7X7	Ribosomal protein L28-like	80.5	111.7	125.5
39	M1BE70	short chain alcohol dehydrogenase-like	73.4	119.5	125.1
40	K4C945	chloroplast stem-loop binding protein, chloroplastic-like	105.9	96.3	125
41	M1C9L0	HIPL1 protein-like	41.5	81.6	124.3
42	B3F8G6	2-C-methyl-D-erythritol 4-phosphate cytidyltransferase	78.1	136.8	124
43	Q006Q0	Malic enzyme	38.6	89.6	123.5
44	K4BUB7	Serine hydroxymethyltransferase	76.4	110.9	123.1
45	C9DFB6	Putative uncharacterized protein (Fragment)	67.9	150.6	123.1
46	M1D0I5	Oligopeptidase A-like	56.4	115.3	123.1
47	M1AWJ2	Heat shock protein 70-like	38.2	156.6	123
48	M1BAZ0	Heat shock 70 kDa protein-like	49.9	139.6	123
49	Q9LW96	Inositol-3-phosphate synthase	39.7	200.9	122.7
50	M1CAU6	60S ribosomal protein L22-like	92.8	104.6	122.7
51	Q6L5N5	Heat shock protein 70 (Fragment)	37.2	154.3	122.4
52	Q2QFR3	Cysteine proteinase aleuran type	34.3	169.8	122.3
53	Q9AXU4	Threonine dehydratase	66.5	129.7	122
54	Q07761	60S ribosomal protein L23a	99.7	102.7	121.4
55	K4C8G1	protein SET-like	72.5	124.8	121.4
56	Q9FR00	Avr9/Cf-9 rapidly elicited protein 31	29.4	160.8	121.2
57	K4C2W4	Protein disulfide-isomerase	28.2	171.5	121.2
58	M1B4H5	Calnexin-like	60.8	98.7	121.2
59	K4ATQ3	probable peptidyl-prolyl cis-trans isomerase-like	61.8	124.4	121.1
60	Q84LF0	5-epi-aristolochene synthase 2	72.7	113.5	120.8
61	A0A060Q2U8	Aminoacylase-1	54	133.6	120.8
62	K4AT98	Cystatin-like	87.6	88.7	120.5
63	K4CLC9	Serine hydroxymethyltransferase	87.1	105	120.3
64	K4CJ96	6,7-dimethyl-8-ribityllumazine synthase	111	103.9	120.2
65	M1CXI6	Aspartate aminotransferase	109.2	97.2	119.8
66	K4B1S7	60S ribosomal protein L3-like	69.1	137	119.8
67	Q9FSF0	Malate dehydrogenase	80.8	105.9	119.7
68	M0ZY56	Plasma membrane H+-ATPase-like	78.4	72.7	119.3
69	M0ZSX2	Purple acid phosphatase	58.9	143.1	119.2
70	M0ZVS8	Alpha-mannosidase	72.6	118.5	118.7
71	M1BCZ9	Lactoylglutathione lyase	88.6	106.8	118.6
72	A9YTW5	Putative red chlorophyll catabolite reductase	60.6	150.5	118.6
73	K4BJK7	40S ribosomal protein S3a	89.9	106.5	118.6
74	K4CBV6	60S ribosomal protein L7-3-like	98.8	92.5	118.6
75	K4BIC0	glutamate synthase 1 [NADH], chloroplastic-like	75	94.6	118.5
76	P17614	ATP synthase subunit beta, mitochondrial	74.9	105.2	118.5
77	K4B2Y6	kynurenine formamidase-like	52.9	124.5	118.4
78	M0ZTU6	Double-stranded DNA-binding protein-like	83.1	100.4	118.1
79	E5FE88	Ribulose-1,5-bisphosphate/carboxylase large subunit (Fragment)	94.9	70	118
80	K4BBN0	ferredoxin-thioredoxin reductase catalytic chain, chloroplastic-like	108.1	92.7	118
81	B1Q486	Aconitate hydratase	60	113.1	117.9
82	K4APY0	Eukaryotic translation initiation factor 6	75.8	108.8	117.8
83	M1AUG5	Ribosomal protein-like	91.7	113	117.7
84	K4CXX8	Proteasome subunit alpha type	69	127.6	117.6
85	K4CVC2	fumarate hydratase 1, mitochondrial-like	79	95.3	117.6
86	M1B9J5	Globulin-like	59.5	121.5	117.5
87	M1CRA9	drought-induced protein SDi-6-like	80.1	83.2	117.5
88	C9DFB7	Protein disulfide isomerase (Fragment)	40.1	156	117.4
89	Q6RYC4	Ribosomal protein L19	86.3	118.9	117.4
90	K4B7K2	14 kDa zinc-binding protein-like	73.8	134.3	117.4
91	B1Q484	Putative 4-methyl-5(B-hydroxyethyl)-thiazol monophosphate	75.7	121.1	117.4
92	Q60CZ3	Ribulose-phosphate 3-epimerase, cytoplasmic isoform, putative	76.7	111.3	117.4
93	V9TI00	12-oxophytodienoate reductase 3	87.2	89.3	117.3
94	M1BNM8	Proteasome subunit alpha type	94.1	92	117.1
95	K4DHU5	huntingtin-interacting protein K-like	84	115.1	117
96	K4CQW8	Monodehydroascorbate reductase-like	60.4	105.2	116.9
97	M0ZN11	Aldo-keto reductase-like	76.9	123.8	116.9
98	K4B124	Uncharacterized protein	101.6	90.7	116.8
99	U3PWQ0	EF2 protein	33.6	146.3	116.6
100	P80461	Glutathione reductase, chloroplastic (Fragment)	96	98.1	116.6

## Sheet: Table S5
Supplemental Table S5. The 60 most upregulated proteins in empty vector (EV)-infiltrated leaves relative to non-infiltrated leaves
Accession	Protein name	Ratio
P23432	Glucan endo-1,3-beta-glucosidase	21.516
J9XUY3	Kunitz-type protease inhibitor (Fragment)	15.242
K4B8W8	Phospholipase A1-IIgamma-like	9.565
Q50LG4	Suberization-associated anionic peroxidase-like	8.872
D4IHB9	Kunitz-type trypsin inhibitor alpha chain-like	8.151
Q84LQ7	29 kDa chitinase-like thermal hysteresis protein	7.367
A0A0B5GNH2	Endoplasmic reticulum chaperone binding protein	6.658
Q43584	Probable carboxylesterase 15	6.146
K4C2W4	Protein disulfide-isomerase	6.076
P08252	Endochitinase 4	6.024
P07052	Pathogenesis-related R major form	5.956
M1BBJ6	Probable mannitol dehydrogenase	5.604
Q9FR00	Calcium-binding CAST-like	5.473
Q9LW96	Inositol-3-phosphate synthase	5.065
Q2QFR3	Cysteine proteinase aleuran	4.956
Q70G33	Hydroxycinnamoyl quinate transferase	4.938
A0A059XN47	Polygalacturonase inhibitor protein	4.885
M1B584	DNA damage-inducible 1	4.879
Q9SSV1	Intracellular ribonuclease LX-like	4.635
K4B7Q7	Probable cinnamyl alcohol dehydrogenase 6	4.574
M1A9W5	Phosphoglycerate mutase family	4.509
U3PWQ0	Pathogen-related -like	4.356
A0A075EYT4	Peroxisomal acyl- oxidase 1A	4.286
F2VJF4	Miraculin-like protein	4.224
K4BRF6	Methyltransferase DDB_G0268948	4.189
Q6L5N5	Heat shock 70 kDa 17	4.146
M1AWJ2	Heat shock 70 (Hsp 70) family	4.098
Q03685	Luminal-binding protein 5	3.97
Q02200	Lignin-forming anionic peroxidase-like	3.936
K4BF11	Peroxidase P7-like	3.909
C9DFB7	Protein disulfide isomerase	3.895
K4AR66	Peroxidase 2-like	3.86
V9TLJ9	12-oxophytodienoate reductase 1-like isoform X1	3.794
P80969	Tyramine N-feruloyltransferase 4 11-like	3.756
K4D1Z3	Pyruvate decarboxylase 1-like	3.69
K4CZD5	coatomer subunit delta-like	3.679
Q94KK8	Glutamate decarboxylase 4	3.665
P15797	Glucan endo-1,3-beta-glucosidase	3.595
Q03198	Proteinase inhibitor I-A	3.502
P14170	Osmotin	3.496
Q5NTA8	Putative 5-epi-aristolochene synthase	3.49
K4CGM9	Persulfide dioxygenase ETHE1 homolog, mitochondrial-like	3.489
K4BA67	Vacuolar-sorting receptor 6-like	3.334
Q43799	Apoplastic invertase	3.304
Q9XIY9	p27 precursor	3.235
M1CA03	psbP 1, chloroplastic	3.221
U3RJ91	Gamma aminobutyrate transaminase 3, chloroplastic	3.199
K4C735	2-alkenal reductase (NADP(+)-dependent)	3.113
K4C0M5	Carboxymethylenebutenolidase homolog	3.103
A0A0F6P9E3	Aldehyde dehydrogenase family 2 member C4	3.076
K4BT18	Uncharacterized protein	3.014
Q9SYX6	Glucan endo-1,3-beta-glucosidase	2.998
K4D5D7	LETM1 and EF-hand domain-containing 1, mitochondrial	2.994
M1CBR7	coatomer subunit delta-like	2.905
A0A068JKR2	Pathogenesis-related protein PR-10	2.904
M0ZX98	Subtilisin-like protease	2.893
K4C284	Glutamate decarboxylase-like	2.853
M1CL86	Dihydrolipoamide dehydrogenase precursor	2.839
P93344	Aldehyde dehydrogenase family 2 member B7-like	2.839
Q42964	Lignin-forming anionic peroxidase	2.812

## Sheet: Table S6
Supplemental Table S6. The 60 most downregulated proteins in EV-infiltrated leaves relative to non-infiltrated leaves
Accession	Protein name	Ratio
K4CCP7	Elongation factor Ts	0.082
Q0PWS6	Chlorophyll a-b binding CP24 10A, chloroplastic	0.093
Q0PWS5	Chlorophyll a-b binding CP26, chloroplastic	0.095
Q43797	Pyrophosphate-energized vacuolar membrane proton pump	0.098
P59702	Photosystem II cytochrome b559 alpha subunit	0.098
A0A0A8WK76	Probable aquaporin PIP2-1	0.106
K4BKH7	Uncharacterized protein	0.106
Q40425	Glycine-rich RNA-binding -like	0.115
M1A0N1	Uncharacterized protein	0.118
K4C841	ACT domain-containing DS12, chloroplastic-like	0.123
K7WJR7	Chlorophyll a/b-binding protein	0.126
K4C4W2	Remorin a4-e8	0.127
P06290	ATP synthase CF0 subunit I (chloroplast)	0.128
I6N953	Photosystem II CP43 chlorophyll apo (chloroplast)	0.135
K4C7M7	ATP synthase subunit b , chloroplastic-like	0.141
P29302	Photosystem I reaction center subunit II, chloroplastic	0.143
M1DBW2	Ribosomal S12 (chloroplast)	0.144
M1A511	Photosystem I reaction center subunit N, chloroplastic	0.148
A0A075VUZ8	Photosystem II D2 (chloroplast)	0.151
Q84UU0	Photosystem I reaction center subunit XI, chloroplastic-like	0.152
K4CYL4	Cysteine synthase 1, mitochondrial	0.161
M1BRE6	rhodanese-like domain-containing 4, chloroplastic	0.165
A0A076L2F1	remorin 1	0.166
M1BAI7	Short-chain dehydrogenase TIC 32, chloroplastic-like	0.169
A8Y6H4	ATP synthase subunit beta (Fragment)	0.172
K4B0Q1	UPF0603 At1g54780, chloroplastic	0.175
K4AZT2	Curvature thylakoid 1A, chloroplastic	0.176
Q9XEX8	remorin 1	0.179
A7XZB8	Thylakoid formation 1, chloroplastic	0.18
K4CRS9	Chlorophyll a-b binding , chloroplastic	0.184
G9BRR3	Heme oxygenase 1	0.196
Q84QE4	Thiamine thiazole synthase, chloroplastic	0.202
B5LAV6	Long chain acyl- synthetase 4-like	0.203
M1CRT2	Uncharacterized protein	0.205
A0A0C5B729	30S ribosomal protein S4, chloroplastic	0.208
P32980	ATP synthase delta chain, chloroplastic	0.209
K4B7F9	Uncharacterized protein	0.209
M1CCH8	Probable inactive serine threonine- kinase slob2	0.211
A0A0A1E5J9	Calcineurin B 3	0.218
A0A0C5AT01	Photosystem II protein D1	0.219
K4CHX2	Porphobilinogen deaminase, chloroplastic	0.22
A0A060B909	Cytochrome b6	0.221
A0A059Q6D7	Photosystem I P700 apo A2 (chloroplast)	0.232
M0ZH09	rhodanese-like domain-containing 4, chloroplastic	0.235
A0A060BCE9	Photosystem I P700 apo A1 (chloroplast)	0.239
M1DZ44	Photosystem II CP47 chlorophyll apo (chloroplast)	0.241
K4C390	Phosphomethylpyrimidine synthase, chloroplastic	0.241
K4ASB8	Uncharacterized protein	0.244
M1BIE3	Uncharacterized protein	0.249
Q08935	29 kDa ribonucleo A, chloroplastic	0.252
K4C994	beta-glucosidase 3B-like	0.252
M0ZU44	Elongation factor Ts isoform 2	0.259
K4BLP5	COBW domain-containing 1	0.26
K4BML2	30S ribosomal S17, chloroplastic	0.263
H1AD87	ADP-ribosylation factor 8A	0.268
B3F8G9	4-hydroxy-3-methylbut-2-enyl diphosphate reductase	0.27
K4BPJ2	Actin-depolymerizing factor 2	0.27
K4CXU8	Chlorophyll a-b binding 8, chloroplastic-like	0.273
H9CCH7	3-oxoacyl-[acyl-carrier- ] reductase 4-like	0.275
K4BXD1	30S ribosomal 3, chloroplastic-like	0.278

## Sheet: Table S7
Supplemental Table S7. The 60 most upregulated proteins in M2-expressing leaves relative to EV-infiltrated leaves
Accession	Protein name	Ratio
M1DBW2	Ribosomal S12 (chloroplast)	2.57732
M1A0N1	Uncharacterized protein	2.33645
K4BLP5	COBW domain-containing 1	2.30947
Q40425	Glycine-rich RNA-binding-like	2.2779
K4CCP7	Elongation factor Ts	2.26757
H2ESL0	Pathogenesis-related protein PR10	2.22717
A0A088DBC4	Copper transport ATX1-like	2.15983
K4CYL4	Cysteine synthase 1	2.11416
A0A0C5B729	30S ribosomal protein S4	2.079
M1B359	Probable NAD(P)H dehydrogenase (quinone) FQR1-like 1	2.03666
K4C4W2	Remorin 1	1.98413
Q36570	Ribosomal S19 (chloroplast)	1.93798
K4BF11	Peroxidase P7-like	1.92678
A0A068JKR2	Pathogenesis-related protein PR-10	1.9084
Q84QE4	Thiamine thiazole synthase, chloroplastic	1.89394
M1D6E8	Ribulose bisphosphate carboxylase oxygenase large subunit	1.86567
K4CHX2	Porphobilinogen deaminase, chloroplastic	1.85185
Q2EZ42	Ribulose bisphosphate carboxylase/oxygenase large subunit	1.83486
K4C390	Phosphomethylpyrimidine synthase, chloroplastic	1.81818
P30155	50S ribosomal L27, chloroplastic	1.81818
A0A076FNJ9	Delta-aminolevulinic acid dehydratase, chloroplastic	1.7452
M1A047	Huntingtin-interacting K	1.74216
K4BV58	30S ribosomal S9, chloroplastic	1.73611
K4C841	ACT domain-containing DS12, chloroplastic-like isoform X1	1.7331
K4BML2	30S ribosomal S17, chloroplastic	1.72414
K4DI37	50S ribosomal L6, chloroplastic	1.71233
Q7YM65	Ribulose bisphosphate carboxylase large chain (Fragment)	1.71233
E5FE88	Ribulose bisphosphate/carboxylase large subunit (Fragment)	1.68634
K4DHX8	Heat shock factor-binding 1-like	1.67785
Q40893	Ribulose 1,5-bisphosphate carboxylase small subunit mRNA	1.67224
M1A989	50S ribosomal L1, chloroplastic	1.66389
M0ZY56	Plasma membrane ATPase 4	1.63934
K4B9S5	ATP synthase gamma chain, chloroplastic	1.62866
Q8S8W8	ATP synthase CF1 beta subunit (chloroplast)	1.62602
A8Y6H4	ATP synthase subunit beta (Fragment)	1.60772
M1BZW7	transketolase, chloroplastic	1.60772
K4C7M7	ATP synthase subunit b , chloroplastic	1.59744
K4C261	Serine hydroxymethyltransferase 4	1.5949
A5A5A1	50S ribosomal L25	1.58983
Q0PWS6	Chlorophyll a-b binding CP24 10A, chloroplastic	1.57729
K4BG20	60S ribosomal L26-1	1.57233
A0A076KWG9	Sedoheptulose-1,7-bisphosphatase, chloroplastic	1.54321
K4BKH7	Uncharacterized protein	1.54083
K4CNG0	50S ribosomal L19-2, chloroplastic-like	1.5361
M1C888	Thioredoxin Y1, chloroplastic	1.53139
M1C9L0	HIPL1 -like	1.52439
K4BVS6	Thioredoxin CDSP32, chloroplastic	1.51745
K4D5C2	Phosphoglycolate phosphatase 1B, chloroplastic-like	1.51515
C3RXI5	Plastid transketolase	1.51286
M0ZH09	Rhodanese-like domain-containing 4, chloroplastic	1.51057
M1B9T8	Aspartate aminotransferase, cytoplasmic	1.5083
K4BIC8	Probable calcium-binding CML13	1.50602
K4BXD1	30S ribosomal 3, chloroplastic-like	1.49701
S5ZIN5	Cysteine synthase	1.49031
K4CR71	Actin-depolymerizing factor 1	1.48368
M1BQT9	DJ-1 homolog D	1.48368
M1BTP6	14-3-3 9	1.48148
A0A059Q659	Ribosomal protein S8	1.47929
M1CGN3	50S ribosomal L21, chloroplastic	1.4771
A2IBL2	Core histone H2A H2B H3 H4	1.46413

## Sheet: Table S8
Supplemental Table S8. The 60 most downregulated proteins in M2-expressing leaves relative to ER-infiltrated leaves
Accession	Protein name	Ratio
J9XUY3	Kunitz-type protease inhibitor (Fragment)	0.0876578
Q50LG4	Suberization-associated anionic peroxidase-like	0.223914
K4B8W8	Phospholipase A1-IIgamma-like	0.228833
D4IHB9	kunitz-type trypsin inhibitor alpha chain-like	0.235239
P07052	Pathogenesis-related R major form	0.275786
P23432	Glucan endo-1,3-beta-glucosidase	0.323729
Q02200	Lignin-forming anionic peroxidase-like	0.326904
A0A077DCL8	Phosphoenolpyruvate carboxykinase [ATP]-like	0.342936
K4B7Q7	Probable cinnamyl alcohol dehydrogenase 6	0.355366
P93344	Aldehyde dehydrogenase family 2 member B7	0.367512
Q84LQ7	29 kDa chitinase-like thermal hysteresis protein (Fragment)	0.374672
Q03198	Proteinase inhibitor I-A	0.39968
P08252	Endochitinase 4	0.407166
Q02214	Trypsin inhibitor 1-like	0.42517
K4CZD5	coatomer subunit delta-like	0.461681
Q43584	Probable carboxylesterase 15	0.464468
J9Y6P6	Salicylic acid-binding 2	0.470367
Q70G33	Hydroxycinnamoyl quinate transferase	0.475511
Q43799	Apoplastic invertase	0.481928
M1B584	DNA damage-inducible 1	0.507614
K4DBX2	ss-galactosidase precursor	0.511509
O23792	Aspartic protease in guard cell 2-like	0.513611
M1CV01	Far upstream element-binding 2-like	0.514139
M1DAI9	Peroxidase 43-like	0.514668
A0A077DBL0	Xyloglucan-specific fungal endoglucanase inhibitor precursor	0.517866
K4B139	Topless-related 3 isoform X2	0.518403
F2VJF4	Miraculin-like protein	0.523834
M1CA03	psbP 1, chloroplastic	0.524934
Q6XP48	Bifunctional UDP-glucose 4-epimerase and UDP-xylose 4-epimerase 1	0.52687
A0A0F7JLU6	Glyceraldehyde-3-phosphate dehydrogenase, cytosolic	0.530504
M1BZ89	Dentin sialophospho	0.532481
K4CXV5	Ribose-phosphate pyrophosphokinase 4	0.534188
M0ZSU7	Probable splicing factor 3A subunit 1	0.536193
M1A2M6	Patellin-3-like	0.542888
D3TI69	Beta-hexosaminidase 2	0.552181
B6EWX2	UDP-glycosyltransferase 73C1-like	0.552792
K4BA67	Vacuolar-sorting receptor 6-like	0.568182
U3RJ91	Gamma aminobutyrate transaminase 3, chloroplastic	0.575374
W6JLY5	Nuclear-pore anchor	0.58072
D2CFQ1	Phenylalanine ammonia-lyase	0.585823
K4CLS9	Galactose-binding domain	0.58651
A0A0B5GNH2	Endoplasmic reticulum chaperone binding protein	0.597729
Q42961	Phosphoglycerate kinase, chloroplastic	0.609013
Q9LW96	Inositol-3-phosphate synthase	0.610874
M0ZSK0	ATP-dependent Clp protease proteolytic subunit 5, chloroplastic	0.611995
Q8GUA3	Vacuolar invertase	0.61237
A0A075EYT4	Peroxisomal acyl- oxidase 1A	0.618812
Q5UNS2	Arginase 1, mitochondrial	0.619195
Q9SSV1	Intracellular ribonuclease LX-like	0.620347
K4D5D7	LETM1 and EF-hand domain-containing 1, mitochondrial	0.626174
M1BAU4	Alpha-xylosidase 1-like	0.628931
O24109	1-aminocyclopropane-1-carboxylate oxidase	0.631712
B7U9Z3	ER luminal-binding protein	0.633714
U3MXK9	Auxin-repressed kDa -like	0.633714
M1CBR7	coatomer subunit delta-like	0.637349
P14170	Osmotin	0.637349
K4CLG9	Vacuolar sorting-associated 32 homolog 2-like	0.640205
H1ZXA9	Heat shock cognate 70 kDa 2-like	0.642261
K4B2H7	psbP domain-containing 1, chloroplastic	0.642674
M0ZX98	Subtilisin-like protease	0.645161

## Sheet: Table S9
Supplemental Table S9. DNA primers for the RT-qPCR amplifications
Gene type	Targeted gene	Primer name	Primer sequence (5' --- 3')	Primer location	Tm (°C)	Amplicon size (bp)
Reference genes	NbEF1α	EF1for	ACCAGATTAATGAGCCCAAGAG	662-683	60	199
		EF1rev	AGAGCTTCGTGGTGCATCT	842-860	60
	NbACT	ACTfor1	TATGGAAACATTGTGCTCAGTGGT	886-909	61	150
		ACTrev1	TCCTCCAATCCAGACACTGTA	1015-1035	61
	NbUBQ	UBQfor	CATCCAAATATCAACAGTAATGG	223-245	59	108
		UBQrev	CAAAAGTGAGCAGATTGAAAGC	309-330	62
	NbSAND	SANDfor	TCATCCGAGTTTTCCTCACC	1486-1505	63	161
		SANDrev	TGAGTAACCCAGCACAGCAG	1627-1646	63
	NbVATP	VATPfor	CTGGTGTTTTGGGTATTTATGG	185-206	61	130
		VATPrev	GCAAGACCACAAGCAAGACC	295-314	64
	NbGAPDH	GAPDHfor	GCAATCAAGGAGGAATCAGAG	796-816	62	202
		GAPDHrev	TCAAATCAATCACACGAGAGC	977-997	62
ER stress	NbPDI713	PDI713for	GGTTGTTAGAGATACCCTCCAGG	1164-1186	62	138
		PDI713rev	TCACTGTCAAACGATACGGC	1282-1301	62
	NbBIP1	BIP1for	GAAACAGCCTGGAGACTTACG	1712-1732	61	165
		BIP1rev	CATAATCCTCCTTCTCAGCG	1857-1876	60
Plant defense	PR3	PR3for	GTTATTGCTGGCTTAGAGAACG	482-503	61	175
		PR3rev	TCAGGATTGTTTAGGAGGTCC	636-656	61
Chloroplast	RbcL	RbsLfor	GGCTTTGTTGATTTACTGCG	1030-1049	61	196
		RbsLrev	GTCCTAAAGTTCCTCCACCG	1206-1225	61
	RbcS	RbsSfor	GCAGATACTGGACGATGTGG	365-384	62	164
		RbsSrev	GTAGGCGATGAAACTGATGC	509-528	61
